# Supplementary material for: Chemoproteomics-based target profiling of sinomenine reveals multiple protein regulators of inflammation
Source: Royal Society of Chemistry journal article supplement (doi:10.1039/d1cc01522b), 2021-01-01
Supplement: d1cc01522b1.xlsx [file d1cc01522b1.xlsx]

## Sheet: KEGG 
KEGG (the ten smallest P-value)
Term	Gene names	Count	P-value
Spliceosome	Thoc1,Crnkl1,Thoc2,Prpf3，Prpf6，Snrnp70	6	0.00162825
Leukocyte transendothelial migration	Rock2，Vasp，Rhoa，Rap1a，Ncf1	5	0.00704258
Biosynthesis of antibiotics	Pycr2，Akr1a1，Dld，Idh3g，Acaa2，Adh5	6	0.0122017
Ribosome biogenesis in eukaryotes	Tbl3，Csnk2a1，Wdr3，Utp18	4	0.0165023
Degradation of aromatic compounds	Akr1a1，Adh5	2	0.0193793
Chemokine signaling pathway	Rock2，Ikbkb，Rhoa，Rap1a，Ncf1	5	0.0378871
Platelet activation	Rock2，Vasp，Rhoa，Rap1a	4	0.053019
Wnt signaling pathway	Rock2，Ctbp2，Csnk2a1，Rhoa	4	0.0633359
Colorectal cancer	Mlh1，Rhoa，Appl1	3	0.0647077
Glycolysis / Gluconeogenesis	Akr1a1，Dld，Adh5	3	0.0682922

## Sheet: GO(CC)
Cellular components (the ten smallest P-value)
Term		Count	P-value
nucleus	TSFM, CRNKL1, ZC3HAV1, CSTF3, PRPF3, CDK1, RRP9, EPB41L2, UTP18, RAD50, STIP1, CTBP2, RHOA, THOC1, HPF1, NDRG2, ROCK2, DAB2, TBL3, RBM19, SYNE3, POLR2C, LPXN, DDX27, RPL13A, CSNK2A1, NDUFS3, FXR2, ADH5, RPL11, TIMELESS, POLA1, EIF3K, LGALS3, FTH1, PRDX4, PRPF6, SNRNP70, APPL1, RNMT, LUC7L3, MLH1, WDR3, IKBKAP, NIFK, NCAPH, DCAF13, THOC2, IKBKB, EXOSC10, PTGES3, RALY	52	3.33603e-08
extracellular exosome	CISD1, EIF3K, LGALS3, PSMD6, CDK1, TBC1D15, EPB41L2, FTH1, VASP, PRDX4, CTSZ, RHOA, RAP1A, APPL1, ACTR1B, NDRG2, ANKFY1, DAB2, AHSA1, LASP1, DBNL, AKR1A1, SCAMP3, TXNDC5, FXR2, PTGES3, FNBP1L, MYH11, ACAA2, RPL11, ADH5	31	4.68802e-07
nucleolus	TIMELESS, DAB2, POLA1, TBL3, RBM19, WDR3, IKBKAP, RRP9, NIFK, DDX27, UTP18, RPL13A, DCAF13, EXOSC10, RPL11, RNMT	16	3.35447e-06
small-subunit processome	TBL3, DCAF13, WDR3, RRP9, UTP18	5	1.80578e-05
cytoplasm	PYCR2, ZC3HAV1, POLA1, EIF3K, LGALS3, PRPF3, CDK1, TBC1D15, EPB41L2, NCF1, STIP1, ARCN1, VASP, CKAP5, PRDX4, RHOA, SNRNP70, RAP1A, ACTR1B, ANKFY1, HSPA14, THOC1, NDRG2, ROCK2, DAB2, AHSA1, RBM19, DBNL, LASP1, POLR2C, IFI44, LPXN, IKBKAP, NIFK, RIPK3, NCAPH, SNX5, RPL13A, DCAF13, IKBKB, FXR2, PTGES3, EXOSC10, EML4, FNBP1L, MYH11, ADH5, RPL11	48	5.19291e-05
Pwp2p-containing subcomplex of 90S preribosome	TBL3, WDR3, UTP18	3	0.000187486
nuclear speck	THOC1, CRNKL1, LUC7L3, THOC2, PRPF3, PRPF6, SNRNP70	7	0.000280682
spliceosomal complex	CRNKL1, LGALS3, PRPF3, PRPF6, SNRNP70, RALY	6	0.00032692
nucleoplasm	NDRG2, THOC1, POLA1, LUC7L3, RBM19, CSTF3, MLH1, DLD, POLR2C, PRPF3, CDK1, NIFK, EPB41L2, RAD50, PTGES3, PRPF6, SNRNP70, RPL11, RNMT	19	0.00156143
cell-cell adherens junction	SNX5, ZC3HAV1, VASP, CKAP5, AHSA1, DBNL, LASP1	7	0.00263182

## Sheet: GO(BP)
Biological processes (the ten smallest P-value)
Term	Gene names	Count	P-value
mRNA processing	THOC1, CRNKL1, LUC7L3, CSTF3, LGALS3, THOC2, PRPF3, PRPF6, RNMT, RALY	10	1.67e-05
RNA processing	CRNKL1, TRMT2A, CSTF3, EXOSC10, PRPF6, TRNT1	6	2.12e-05
rRNA processing	TBL3, DCAF13, EXOSC10, RRP9, DDX27, RPL11, UTP18	7	2.47e-05
RNA splicing	THOC1, CRNKL1, LUC7L3, LGALS3, THOC2, PRPF3, PRPF6, RALY	8	0.00012
cell-cell adhesion	SNX5, ZC3HAV1, VASP, CKAP5, AHSA1, DBNL, LASP1	7	0.000233
maturation of SSU-rRNA from tricistronic rRNA transcript (SSU-rRNA, 5.8S rRNA, LSU-rRNA)	TBL3, DCAF13, WDR3, UTP18	4	0.000281
cell redox homeostasis	PRDX4, DLD, ERO1LB, TXNDC5	4	0.00331879
oxidation-reduction process	PYCR2, CTBP2, PRDX4, AKR1A1, DLD, ERO1LB, NDUFS3, IDH3G, ADH5, FTH1	10	0.00377656
cortical actin cytoskeleton organization	ROCK2, IKBKB, EPB41L2	3	0.00538088
I-kappaB kinase/NF-kappaB signaling	ROCK2, IKBKB, RIPK3	3	0.00944328

## Sheet: GO (MF)
Molecular functions (the ten smallest P-value)
Term	Gene names	Count	P-value
poly(A) RNA binding	TSFM, CRNKL1, ZC3HAV1, CSTF3, LGALS3, PRPF3, RRP9, UTP18, STIP1, ARCN1, PRPF6, SNRNP70, ROCK2, LUC7L3, TBL3, RBM19, WDR3, DDX27, NIFK, TRMT2A, RPL13A, DCAF13, EXOSC10, FXR2, ACAA2, RPL11, RALY	27	3.30536e-12
RNA binding	THOC1, CRNKL1, ZC3HAV1, EIF3K, RBM19, RRP9, NIFK, TRMT2A, THOC2, FXR2, EXOSC10, PRPF6, SNRNP70, RPL11, TRNT1, RNMT, RALY	17	5.74814e-07
nucleotide binding	HSPA14, ATP2B4, ROCK2, POLA1, RBM19, CDK1, NIFK, IDH3G, DDX27, RIPK3, RAD50, TRMT2A, SAR1B, IKBKB, EXOSC10, RHOA, SNRNP70, RAP1A, MYH11, TRNT1, ACTR1B, RALY	22	0.000180827
mRNA binding	LUC7L3, RPL13A, CSTF3, THOC2, FXR2, SNRNP70	6	0.000549336
cadherin binding involved in cell-cell adhesion	SNX5, ZC3HAV1, VASP, CKAP5, AHSA1, DBNL, LASP1	7	0.00200908
oxidoreductase activity	PYCR2, CTBP2, PRDX4, AKR1A1, DLD, ERO1LB, NDUFS3, IDH3G, ADH5, FTH1	10	0.00208064
3'-5' exonuclease activity	POLA1, EXOSC10, RAD50	3	0.00392481
snoRNA binding	TBL3, WDR3, RRP9	3	0.00517871
ATP binding	HSPA14, ATP2B4, ROCK2, CSNK2A1, MLH1, IKBKB, CDK1, IKBKAP, DDX27, IDH3G, RIPK3, MYH11, TRNT1, ACTR1B, RAD50	15	0.0101179
NAD binding	CTBP2, DLD, IDH3G	3	0.0275938

## Sheet: Raw Data of KEGG
Category	Term	Count	P-Value	Genes	Gene names	Pop Hits	Fold Enrichment	Bonferroni	Benjamini	FDR
KEGG_PATHWAY	Spliceosome	6	0.00162825	Q8R3N6, P63154, B1AZI6, Q922U1, Q91YR7, Q62376	Thoc1,Crnkl1,Thoc2,Prpf3，Prpf6，Snrnp70	133	6.80318	0.185618	0.185618	1.86946
KEGG_PATHWAY	Leukocyte transendothelial migration	5	0.00704258	P70336, P70460, Q9QUI0, P62835, Q09014	Rock2，Vasp，Rhoa，Rap1a，Ncf1	118	6.39	0.589551	0.359337	7.85863
KEGG_PATHWAY	Biosynthesis of antibiotics	6	0.0122017	Q922Q4, Q9JII6, O08749, P70404, Q8BWT1, P28474	Pycr2，Akr1a1，Dld，Idh3g，Acaa2，Adh5	214	4.22815	0.787087	0.402872	13.2529
KEGG_PATHWAY	Ribosome biogenesis in eukaryotes	4	0.0165023	Q8C4J7, Q60737, Q8BHB4, Q5SSI6	Tbl3，Csnk2a1，Wdr3，Utp18	83	7.26766	0.877132	0.407948	17.5273
KEGG_PATHWAY	Degradation of aromatic compounds	2	0.0193793	Q9JII6, P28474	Akr1a1，Adh5	3	100.536	0.915056	0.389302	20.2783
KEGG_PATHWAY	Chemokine signaling pathway	5	0.0378871	P70336, O88351, Q9QUI0, P62835, Q09014	Rock2，Ikbkb，Rhoa，Rap1a，Ncf1	196	3.84704	0.9923	0.555628	36.0638
KEGG_PATHWAY	Platelet activation	4	0.053019	P70336, P70460, Q9QUI0, P62835	Rock2，Vasp，Rhoa，Rap1a	131	4.6047	0.998955	0.624903	46.7871
KEGG_PATHWAY	Wnt signaling pathway	4	0.0633359	P70336, P56546, Q60737, Q9QUI0	Rock2，Ctbp2，Csnk2a1，Rhoa	141	4.27813	0.999737	0.643183	53.127
KEGG_PATHWAY	Colorectal cancer	3	0.0647077	Q9JK91, Q9QUI0, Q8K3H0	Mlh1，Rhoa，Appl1	64	7.06893	0.999782	0.608021	53.9159
KEGG_PATHWAY	Glycolysis / Gluconeogenesis	3	0.0682922	Q9JII6, O08749, P28474	Akr1a1，Dld，Adh5	66	6.85472	0.999865	0.589867	55.9202
KEGG_PATHWAY	cGMP-PKG signaling pathway	4	0.0890145	Q6Q477, P70336, P70460, Q9QUI0	Atp2b4，Rock2，Vasp，Rhoa	163	3.70071	0.999992	0.656266	66.0284
KEGG_PATHWAY	RNA transport	4	0.0979843	Q8R3N6, B1AZI6, Q9WVR4, Q8K1J6	Thoc1，Thoc2，Fxr2，Trnt1	170	3.54833	0.999998	0.661352	69.7065

## Sheet: Raw dataof CC  
Category	Term	Count	%	PValue	Genes	List Total	Pop Hits	Pop Total	Fold Enrichment	Bonferroni	Benjamini	FDR
GOTERM_CC_DIRECT	GO:0005634~nucleus	52	59.0909	3.33603e-08	Q9CZR8, P63154, Q3UPF5, Q99LI7, Q922U1, P11440, Q91WM3, O70318, Q5SSI6, P70388, Q60864, P56546, Q9QUI0, Q8R3N6, Q8CFE2, Q9QYG0, P70336, P98078, Q8C4J7, Q8R3C6, Q4FZC9, P97760, Q99N69, Q921N6, P19253, Q60737, Q9DCT2, Q9WVR4, P28474, Q9CXW4, Q9R1X4, P33609, Q9DBZ5, P16110, P09528, O08807, Q91YR7, Q62376, Q8K3H0, Q9D0L8, Q5SUF2, Q9JK91, Q8BHB4, Q7TT37, Q91VE6, Q8C156, Q6PAC3, B1AZI6, O88351, P56960,…	87	6019	19662	1.95248	7.17244e-06	7.17244e-06	4.23085e-05
GOTERM_CC_DIRECT	GO:0070062~extracellular exosome	31	35.2273	4.68802e-07	Q91WS0, Q9DBZ5, P16110, Q99JI4, P11440, Q9CXF4, O70318, P09528, P70460, O08807, Q9WUU7, Q9QUI0, P62835, Q8K3H0, Q8R5C5, Q9QYG0, Q810B6, P98078, Q8BK64, Q61792, Q62418, Q9JII6, O35609, Q91W90, Q9WVR4, Q9R0Q7, Q8K012, O08638, Q8BWT1, Q9CXW4, P28474	87	2674	19662	2.62004	0.000100787	5.0395e-05	0.000594547
GOTERM_CC_DIRECT	GO:0005730~nucleolus	16	18.1818	3.35447e-06	Q9R1X4, P98078, P33609, Q8C4J7, Q8R3C6, Q8BHB4, Q7TT37, Q91WM3, Q91VE6, Q921N6, Q5SSI6, P19253, Q6PAC3, P56960, Q9CXW4, Q9D0L8	87	842	19662	4.29454	0.000720951	0.000240375	0.00425415
GOTERM_CC_DIRECT	GO:0032040~small-subunit processome	5	5.68182	1.80578e-05	Q8C4J7, Q6PAC3, Q8BHB4, Q91WM3, Q5SSI6	87	36	19662	31.3889	0.00387494	0.000970146	0.022899
GOTERM_CC_DIRECT	GO:0005737~cytoplasm	48	54.5455	5.19291e-05	Q922Q4, Q3UPF5, P33609, Q9DBZ5, P16110, Q922U1, P11440, Q9CXF4, O70318, Q09014, Q60864, Q5XJY5, P70460, A2AGT5, O08807, Q9QUI0, Q62376, P62835, Q8R5C5, Q810B6, Q99M31, Q8R3N6, Q9QYG0, P70336, P98078, Q8BK64, Q8R3C6, Q62418, Q61792, P97760, Q8BV66, Q99N69, Q7TT37, Q91VE6, Q9QZL0, Q8C156, Q9D8U8, P19253, Q6PAC3, O88351, Q9WVR4, Q9R0Q7, P56960, Q3UMY5, Q8K012, O08638, P28474, Q9CXW4	87	6631	19662	1.63595	0.0111029	0.00223052	0.065838
GOTERM_CC_DIRECT	GO:0034388~Pwp2p-containing subcomplex of 90S preribosome	3	3.40909	0.000187486	Q8C4J7, Q8BHB4, Q5SSI6	87	5	19662	135.6	0.0395115	0.00669636	0.237515
GOTERM_CC_DIRECT	GO:0016607~nuclear speck	7	7.95455	0.000280682	Q8R3N6, P63154, Q5SUF2, B1AZI6, Q922U1, Q91YR7, Q62376	87	205	19662	7.71707	0.0585698	0.00858509	0.355386
GOTERM_CC_DIRECT	GO:0005681~spliceosomal complex	6	6.81818	0.00032692	P63154, P16110, Q922U1, Q91YR7, Q62376, Q64012	87	136	19662	9.97059	0.0678852	0.00874892	0.413819
GOTERM_CC_DIRECT	GO:0005654~nucleoplasm	19	21.5909	0.00156143	Q9QYG0, Q8R3N6, P33609, Q5SUF2, Q8R3C6, Q99LI7, Q9JK91, O08749, P97760, Q922U1, P11440, Q91VE6, O70318, P70388, Q9R0Q7, Q91YR7, Q62376, Q9CXW4, Q9D0L8	87	1935	19662	2.21912	0.285355	0.0366418	1.96229
GOTERM_CC_DIRECT	GO:0005913~cell-cell adherens junction	7	7.95455	0.00263182	Q9D8U8, Q3UPF5, P70460, A2AGT5, Q8BK64, Q62418, Q61792	87	316	19662	5.00633	0.432541	0.0550835	3.28692
GOTERM_CC_DIRECT	GO:0005739~mitochondrion	17	19.3182	0.00297249	Q9CZR8, Q922Q4, Q91WS0, Q9CXT8, O08749, P11440, Q9CXF4, P70404, Q9QZL0, Q9QXX4, P09528, O08807, Q9DCT2, Q9QUI0, Q8BWT1, P28474, Q8K1J6	87	1721	19662	2.23242	0.472727	0.0565247	3.70503
GOTERM_CC_DIRECT	GO:0005925~focal adhesion	7	7.95455	0.00736118	P98078, P70460, P19253, Q61792, Q99N69, O70318, Q9QUI0	87	391	19662	4.04604	0.79577	0.123988	8.94459
GOTERM_CC_DIRECT	GO:0030529~intracellular ribonucleoprotein complex	6	6.81818	0.0131917	P19253, Q6PAC3, Q91WM3, Q62376, Q9CXW4, Q64012	87	320	19662	4.2375	0.94245	0.197178	15.4997
GOTERM_CC_DIRECT	GO:0000794~condensed nuclear chromosome	3	3.40909	0.0158814	Q9JK91, Q91VE6, P70388	87	44	19662	15.4091	0.967996	0.217961	18.3746
GOTERM_CC_DIRECT	GO:0005694~chromosome	6	6.81818	0.0175093	Q8R3C6, Q9JK91, Q91VE6, Q921N6, P70388, Q8C156	87	344	19662	3.94186	0.977581	0.22368	20.0705
GOTERM_CC_DIRECT	GO:0000784~nuclear chromosome, telomeric region	4	4.54545	0.0182558	Q8R3N6, B1AZI6, P11440, P70388	87	127	19662	7.11811	0.980961	0.219312	20.8373
GOTERM_CC_DIRECT	GO:0000347~THO complex	2	2.27273	0.0216813	Q8R3N6, B1AZI6	87	5	19662	90.4	0.99102	0.242113	24.2698
GOTERM_CC_DIRECT	GO:0005856~cytoskeleton	11	12.5	0.0232241	P70336, P70460, A2AGT5, Q62418, Q61792, P11440, Q3UMY5, Q8K012, O70318, Q9QUI0, Q8R5C5	87	1113	19662	2.2336	0.993604	0.244723	25.7705
GOTERM_CC_DIRECT	GO:0000445~THO complex part of transcription export complex	2	2.27273	0.0302231	Q8R3N6, B1AZI6	87	7	19662	64.5714	0.998637	0.293388	32.2408
GOTERM_CC_DIRECT	GO:0015630~microtubule cytoskeleton	4	4.54545	0.0320919	Q9R1X4, P97760, Q3UMY5, Q8R5C5	87	158	19662	5.72152	0.9991	0.295766	33.8783
GOTERM_CC_DIRECT	GO:0016020~membrane	40	45.4545	0.0389943	Q91WS0, Q9DBZ5, P16110, P11440, O70318, P70388, Q09014, Q5XJY5, P70460, A2AGT5, Q91YR7, Q9QUI0, P62835, Q8K3H0, Q8R5C5, Q810B6, Q6Q477, Q99M31, P70336, P98078, Q8R3C6, Q9JK91, Q4FZC9, Q62418, Q99N69, O35609, Q9QZL0, Q9QXX4, Q8C156, Q9D8U8, P19253, Q9CQC9, Q8R2E9, O88351, Q9DCT2, Q9WVR4, P56960, Q3UMY5, Q8K012, Q9CXW4	87	6998	19662	1.2918	0.999807	0.334502	39.6155
GOTERM_CC_DIRECT	GO:0005813~centrosome	6	6.81818	0.0420217	Q9QYG0, P70336, A2AGT5, Q6PAC3, P11440, Q8R5C5	87	435	19662	3.11724	0.999902	0.342654	41.9841
GOTERM_CC_DIRECT	GO:0005829~cytosol	14	15.9091	0.0459273	Q810B6, Q99M31, Q8BK64, Q62418, Q9JII6, Q9QZL0, Q09014, Q60864, Q9D8U8, P70460, O08807, O88351, Q9QUI0, Q8K3H0	87	1784	19662	1.77354	0.999959	0.355636	44.9134
GOTERM_CC_DIRECT	GO:0043231~intracellular membrane-bounded organelle	8	9.09091	0.0461541	Q6Q477, P98078, Q5XJY5, Q91WS0, O88351, O35609, Q9WUU7, Q9R0Q7	87	751	19662	2.40746	0.999961	0.345124	45.0792
GOTERM_CC_DIRECT	GO:0005759~mitochondrial matrix	4	4.54545	0.049456	Q9CZR8, Q9CXT8, O08749, Q8BWT1	87	188	19662	4.80851	0.999982	0.353511	47.4422
GOTERM_CC_DIRECT	GO:0000346~transcription export complex	2	2.27273	0.0512566	Q8R3N6, B1AZI6	87	12	19662	37.6667	0.999988	0.352801	48.6909
GOTERM_CC_DIRECT	GO:0043209~myelin sheath	4	4.54545	0.0520571	Q60864, O08749, Q9DCT2, P62835	87	192	19662	4.70833	0.99999	0.346693	49.2373
GOTERM_CC_DIRECT	GO:0019898~extrinsic component of membrane	3	3.40909	0.053445	Q9D8U8, O70318, Q09014	87	85	19662	7.97647	0.999993	0.344105	50.1718
GOTERM_CC_DIRECT	GO:0030665~clathrin-coated vesicle membrane	2	2.27273	0.0554089	P98078, Q62418	87	13	19662	34.7692	0.999995	0.344665	51.4672
GOTERM_CC_DIRECT	GO:0071013~catalytic step 2 spliceosome	3	3.40909	0.0662175	P63154, Q91YR7, Q64012	87	96	19662	7.0625	1	0.387987	58.0582
GOTERM_CC_DIRECT	GO:0071004~U2-type prespliceosome	2	2.27273	0.0677582	Q5SUF2, Q62376	87	16	19662	28.25	1	0.385296	58.9274
GOTERM_CC_DIRECT	GO:0022624~proteasome accessory complex	2	2.27273	0.071839	Q8BJY1, Q99JI4	87	17	19662	26.5882	1	0.394005	61.1502
GOTERM_CC_DIRECT	GO:0005685~U1 snRNP	2	2.27273	0.0799479	Q5SUF2, Q62376	87	19	19662	23.7895	1	0.418925	65.2417
GOTERM_CC_DIRECT	GO:0016581~NuRD complex	2	2.27273	0.0799479	Q60737, Q8K3H0	87	19	19662	23.7895	1	0.418925	65.2417
GOTERM_CC_DIRECT	GO:0005623~cell	4	4.54545	0.0807213	O08807, Q4FZC9, O08749, Q91W90	87	231	19662	3.91342	1	0.412704	65.6104
GOTERM_CC_DIRECT	GO:0005622~intracellular	12	13.6364	0.0885767	Q9CZR8, Q9D8U8, P70336, Q9CQC9, Q62418, O88351, P56960, Q9QUI0, Q9QZL0, P62835, Q9CXW4, Q8K1J6	87	1599	19662	1.69606	1	0.434326	69.1568
GOTERM_CC_DIRECT	GO:0005743~mitochondrial inner membrane	5	5.68182	0.089728	Q9CXT8, P16110, Q9DCT2, Q8BWT1, Q9QXX4	87	387	19662	2.9199	1	0.429624	69.6473
GOTERM_CC_DIRECT	GO:0005768~endosome	6	6.81818	0.0900348	Q810B6, Q9D8U8, Q62418, Q9QUI0, Q8K3H0, P62835	87	544	19662	2.49265	1	0.422036	69.7768
GOTERM_CC_DIRECT	GO:0042995~cell projection	7	7.95455	0.0916282	Q9QYG0, Q6Q477, Q9D8U8, P70460, Q62418, Q99N69, Q9QUI0	87	712	19662	2.22191	1	0.419423	70.4412
GOTERM_CC_DIRECT	GO:0030054~cell junction	7	7.95455	0.0944539	P56546, P70460, Q6PAC3, Q62418, Q99N69, O70318, P62835	87	718	19662	2.20334	1	0.421297	71.5863
GOTERM_CC_DIRECT	GO:0030904~retromer complex	2	2.27273	0.0959561	Q810B6, Q9D8U8	87	23	19662	19.6522	1	0.418542	72.1784
GOTERM_CC_DIRECT	GO:0046540~U4/U6 x U5 tri-snRNP complex	2	2.27273	0.099915	Q922U1, Q91YR7	87	24	19662	18.8333	1	0.424206	73.6846

## Sheet: Raw data of BP
Category	Term	Count	%	PValue	Genes	List Total	Pop Hits	Pop Total	Fold Enrichment	Bonferroni	Benjamini	FDR
GOTERM_BP_DIRECT	GO:0006397~mRNA processing	10	11.3636	1.67e-05	Q8R3N6, P63154, Q5SUF2, Q99LI7, P16110, B1AZI6, Q922U1, Q91YR7, Q9D0L8, Q64012	84	322	18082	6.68515	0.0104042	0.0104042	0.0247472
GOTERM_BP_DIRECT	GO:0006396~RNA processing	6	6.81818	2.12e-05	P63154, Q8BNV1, Q99LI7, P56960, Q91YR7, Q8K1J6	84	73	18082	17.6928	0.0132337	0.0066389	0.0315213
GOTERM_BP_DIRECT	GO:0006364~rRNA processing	7	7.95455	2.47e-05	Q8C4J7, Q6PAC3, P56960, Q91WM3, Q921N6, Q9CXW4, Q5SSI6	84	126	18082	11.959	0.01541	0.00516327	0.0367443
GOTERM_BP_DIRECT	GO:0008380~RNA splicing	8	9.09091	0.00012	Q8R3N6, P63154, Q5SUF2, P16110, B1AZI6, Q922U1, Q91YR7, Q64012	84	241	18082	7.14562	0.0727208	0.0186981	0.17851
GOTERM_BP_DIRECT	GO:0098609~cell-cell adhesion	7	7.95455	0.000233	Q9D8U8, Q3UPF5, P70460, A2AGT5, Q8BK64, Q62418, Q61792	84	189	18082	7.97266	0.136277	0.0288755	0.346095
GOTERM_BP_DIRECT	GO:0000462~maturation of SSU-rRNA from tricistronic rRNA transcript (SSU-rRNA, 5.8S rRNA, LSU-rRNA)	4	4.54545	0.000281	Q8C4J7, Q6PAC3, Q8BHB4, Q5SSI6	84	28	18082	30.7517	0.161908	0.0290089	0.417112
GOTERM_BP_DIRECT	GO:0045454~cell redox homeostasis	4	4.54545	0.00331879	O08807, O08749, Q8R2E9, Q91W90	84	65	18082	13.2469	0.876024	0.257875	4.82034
GOTERM_BP_DIRECT	GO:0055114~oxidation-reduction process	10	11.3636	0.00377656	Q922Q4, P56546, O08807, Q9JII6, O08749, Q8R2E9, Q9DCT2, P70404, P28474, P09528	84	676	18082	3.18435	0.907094	0.256972	5.46795
GOTERM_BP_DIRECT	GO:0030866~cortical actin cytoskeleton organization	3	3.40909	0.00538088	P70336, O88351, O70318	84	24	18082	26.9077	0.966235	0.313727	7.7053
GOTERM_BP_DIRECT	GO:0007249~I-kappaB kinase/NF-kappaB signaling	3	3.40909	0.00944328	P70336, O88351, Q9QZL0	84	32	18082	20.1808	0.997416	0.448909	13.1517
GOTERM_BP_DIRECT	GO:0006897~endocytosis	5	5.68182	0.00966069	Q810B6, Q9D8U8, P98078, Q62418, Q8K012	84	181	18082	5.94646	0.997749	0.425479	13.4346
GOTERM_BP_DIRECT	GO:0019471~4-hydroxyproline metabolic process	2	2.27273	0.0137082	O08807, Q8R2E9	84	3	18082	143.508	0.999828	0.514395	18.5461
GOTERM_BP_DIRECT	GO:0000398~mRNA splicing, via spliceosome	4	4.54545	0.0148492	P63154, Q922U1, Q91YR7, Q62376	84	112	18082	7.68793	0.999917	0.514566	19.9353
GOTERM_BP_DIRECT	GO:0006907~pinocytosis	2	2.27273	0.0182363	Q9D8U8, P98078	84	4	18082	107.631	0.99999	0.562018	23.9302
GOTERM_BP_DIRECT	GO:1903347~negative regulation of bicellular tight junction assembly	2	2.27273	0.0182363	P70336, O88351	84	4	18082	107.631	0.99999	0.562018	23.9302
GOTERM_BP_DIRECT	GO:0008283~cell proliferation	5	5.68182	0.0185602	P33609, P11440, Q9R0Q7, Q8K3H0, Q09014	84	220	18082	4.89232	0.999992	0.543587	24.3024
GOTERM_BP_DIRECT	GO:0007049~cell cycle	8	9.09091	0.0226318	Q9R1X4, A2AGT5, Q9JK91, P11440, Q9QUI0, Q8K3H0, P70388, Q8C156	84	614	18082	2.80472	0.999999	0.592822	28.8376
GOTERM_BP_DIRECT	GO:0022417~protein maturation by protein folding	2	2.27273	0.0227438	O08807, Q8R2E9	84	5	18082	86.1048	0.999999	0.572535	28.9586
GOTERM_BP_DIRECT	GO:0035509~negative regulation of myosin-light-chain-phosphatase activity	2	2.27273	0.0272308	P70336, O88351	84	6	18082	71.754	1	0.618341	33.6549
GOTERM_BP_DIRECT	GO:1903140~regulation of establishment of endothelial barrier	2	2.27273	0.0272308	P70336, O88351	84	6	18082	71.754	1	0.618341	33.6549
GOTERM_BP_DIRECT	GO:0030036~actin cytoskeleton organization	4	4.54545	0.0276132	P70336, P70460, O70318, Q9QUI0	84	142	18082	6.06372	1	0.603677	34.0414
GOTERM_BP_DIRECT	GO:0006898~receptor-mediated endocytosis	3	3.40909	0.0310298	P98078, Q62418, P09528	84	60	18082	10.7631	1	0.628339	37.403
GOTERM_BP_DIRECT	GO:0046784~viral mRNA export from host cell nucleus	2	2.27273	0.0316975	Q8R3N6, B1AZI6	84	7	18082	61.5034	1	0.618351	38.041
GOTERM_BP_DIRECT	GO:0010977~negative regulation of neuron projection development	3	3.40909	0.0349306	P98078, B1AZI6, Q9QUI0	84	64	18082	10.0904	1	0.637576	41.0453
GOTERM_BP_DIRECT	GO:0000244~spliceosomal tri-snRNP complex assembly	2	2.27273	0.0405702	Q922U1, Q91YR7	84	9	18082	47.836	1	0.677238	45.963
GOTERM_BP_DIRECT	GO:0007252~I-kappaB phosphorylation	2	2.27273	0.0537288	O88351, Q7TT37	84	12	18082	35.877	1	0.764273	55.9893
GOTERM_BP_DIRECT	GO:0048246~macrophage chemotaxis	2	2.27273	0.062402	P19253, P16110	84	14	18082	30.7517	1	0.80182	61.6179
GOTERM_BP_DIRECT	GO:0006939~smooth muscle contraction	2	2.27273	0.0709966	P70336, O08638	84	16	18082	26.9077	1	0.831152	66.5272
GOTERM_BP_DIRECT	GO:0030261~chromosome condensation	2	2.27273	0.0709966	P11440, Q8C156	84	16	18082	26.9077	1	0.831152	66.5272
GOTERM_BP_DIRECT	GO:0006103~2-oxoglutarate metabolic process	2	2.27273	0.0795134	O08749, P70404	84	18	18082	23.918	1	0.85443	70.809
GOTERM_BP_DIRECT	GO:0006886~intracellular protein transport	4	4.54545	0.0910109	Q9D8U8, Q9CQC9, O35609, Q9CXF4	84	232	18082	3.71141	1	0.882367	75.7828
GOTERM_BP_DIRECT	GO:0006303~double-strand break repair via nonhomologous end joining	2	2.27273	0.0921442	P33609, Q9JK91	84	21	18082	20.5011	1	0.876733	76.2277
GOTERM_BP_DIRECT	GO:0051301~cell division	5	5.68182	0.093213	Q9R1X4, A2AGT5, P11440, Q9QUI0, Q8C156	84	374	18082	2.87783	1	0.871043	76.6403
GOTERM_BP_DIRECT	GO:0051298~centrosome duplication	2	2.27273	0.0963163	P70336, A2AGT5	84	22	18082	19.5693	1	0.871478	77.8005
GOTERM_BP_DIRECT	GO:0030198~extracellular matrix organization	3	3.40909	0.0965296	O08807, P16110, Q8R2E9	84	114	18082	5.66479	1	0.863601	77.8783

## Sheet: Raw data of MF
Category	Term	Count	%	PValue	Genes	List Total	Pop Hits	Pop Total	Fold Enrichment	Bonferroni	Benjamini	FDR
GOTERM_MF_DIRECT	GO:0044822~poly(A) RNA binding	27	30.6818	3.30536e-12	Q9CZR8, P63154, Q3UPF5, Q99LI7, P16110, Q922U1, Q91WM3, Q5SSI6, Q60864, Q5XJY5, Q91YR7, Q62376, P70336, Q5SUF2, Q8C4J7, Q8R3C6, Q8BHB4, Q921N6, Q91VE6, Q8BNV1, P19253, Q6PAC3, P56960, Q9WVR4, Q8BWT1, Q9CXW4, Q64012	83	1113	17446	5.09902	6.84209e-10	6.84209e-10	4.16626e-09
GOTERM_MF_DIRECT	GO:0003723~RNA binding	17	19.3182	5.74814e-07	Q8R3N6, P63154, Q3UPF5, Q9DBZ5, Q8R3C6, Q91WM3, Q91VE6, Q8BNV1, B1AZI6, Q9WVR4, P56960, Q91YR7, Q62376, Q9CXW4, Q8K1J6, Q9D0L8, Q64012	83	780	17446	4.58112	0.000118979	5.94915e-05	0.000724525
GOTERM_MF_DIRECT	GO:0000166~nucleotide binding	22	25	0.000180827	Q99M31, Q6Q477, P70336, P33609, Q8R3C6, P11440, Q91VE6, P70404, Q921N6, Q9QZL0, P70388, Q8BNV1, Q9CQC9, O88351, P56960, Q9QUI0, Q62376, P62835, O08638, Q8K1J6, Q8R5C5, Q64012	83	1936	17446	2.38855	0.0367427	0.0124007	0.227686
GOTERM_MF_DIRECT	GO:0003729~mRNA binding	6	6.81818	0.000549336	Q5SUF2, P19253, Q99LI7, B1AZI6, Q9WVR4, Q62376	83	142	17446	8.88138	0.107513	0.0280354	0.69021
GOTERM_MF_DIRECT	GO:0098641~cadherin binding involved in cell-cell adhesion	7	7.95455	0.00200908	Q9D8U8, Q3UPF5, P70460, A2AGT5, Q8BK64, Q62418, Q61792	83	279	17446	5.27365	0.340516	0.0798877	2.50304
GOTERM_MF_DIRECT	GO:0016491~oxidoreductase activity	10	11.3636	0.00208064	Q922Q4, P56546, O08807, Q9JII6, O08749, Q8R2E9, Q9DCT2, P70404, P28474, P09528	83	604	17446	3.48001	0.350233	0.069336	2.59113
GOTERM_MF_DIRECT	GO:0008408~3'-5' exonuclease activity	3	3.40909	0.00392481	P33609, P56960, P70388	83	20	17446	31.5289	0.556932	0.109783	4.83593
GOTERM_MF_DIRECT	GO:0030515~snoRNA binding	3	3.40909	0.00517871	Q8C4J7, Q8BHB4, Q91WM3	83	23	17446	27.4164	0.658627	0.125714	6.33493
GOTERM_MF_DIRECT	GO:0005524~ATP binding	15	17.0455	0.0101179	Q99M31, Q6Q477, P70336, Q60737, Q9JK91, O88351, P11440, Q7TT37, Q921N6, P70404, Q9QZL0, O08638, Q8K1J6, Q8R5C5, P70388	83	1507	17446	2.09216	0.878162	0.208556	12.0306
GOTERM_MF_DIRECT	GO:0051287~NAD binding	3	3.40909	0.0275938	P56546, O08749, P70404	83	55	17446	11.4651	0.996949	0.439665	29.7209
GOTERM_MF_DIRECT	GO:0035091~phosphatidylinositol binding	3	3.40909	0.0657381	Q9D8U8, P98078, Q09014	83	89	17446	7.08515	0.999999	0.721854	57.5605
GOTERM_MF_DIRECT	GO:0003779~actin binding	5	5.68182	0.0749127	P70460, Q62418, Q61792, O70318, O08638	83	338	17446	3.10936	1	0.738993	62.5244
GOTERM_MF_DIRECT	GO:0003756~protein disulfide isomerase activity	2	2.27273	0.0899698	Q8R2E9, Q91W90	83	20	17446	21.0193	1	0.777135	69.5269
