# Supplementary material for: Chemoproteomics-based target profiling of sinomenine reveals multiple protein regulators of inflammation
Source: Royal Society of Chemistry journal article supplement (doi:10.1039/d1cc01522b), 2021-01-01
Supplement: d1cc01522b2.xlsx [file d1cc01522b2.xlsx]

## Sheet: List of targets
	The table shows the result of label free quantification based on the comparison of SIN-CW probe-treated and control（DMSO）samples, which contain five biological repeat experiments. All the samples meet the requirement of P<0.05 and log2 (fold change) >2.
					LFQ intensity of DMSO groups					LFQ intensity of SIN-CW probe groups
Accession	Description	Gene Symbol	Abundances (Normalized): F1: Control, 1	Abundances (Normalized): F2: Control, 2	Abundances (Normalized): F3: Control, 3	Abundances (Normalized): F4: Control, 4	Abundances (Normalized): F5: Control, 5	Abundances (Normalized): F6: Sample, 1	Abundances (Normalized): F7: Sample, 2	Abundances (Normalized): F8: Sample, 3	Abundances (Normalized): F9: Sample, 4	Abundances (Normalized): F10: Sample, 5	Mean of intensity of DMSO groups	Mean of intensity of SIN-CW probe groups	Fold change (FC)	log2(FC)	P-value	-log10(P)
Q9QZL0	Receptor-interacting serine/threonine-protein kinase 3 OS=Mus musculus OX=10090 GN=Ripk3 PE=1 SV=2	Ripk3	0	0	0	0	0	1.05138e+06	1.29778e+06	1.34551e+06	1.14157e+06	1.49676e+06	0	1.2666e+06	999	9.96434	1.05489e-07	6.97679
Q3UPF5	Zinc finger CCCH-type antiviral protein 1 OS=Mus musculus OX=10090 GN=Zc3hav1 PE=1 SV=1	Zc3hav1	0	0	0	0	0	520219	781142	734786	809458	729727	0	715066	999	9.96434	3.20588e-07	6.49405
Q99JI4	26S proteasome non-ATPase regulatory subunit 6 OS=Mus musculus OX=10090 GN=Psmd6 PE=1 SV=1	Psmd6	0	0	0	0	0	2.81989e+06	2.89904e+06	3.25202e+06	2.37041e+06	1.88338e+06	0	2.64495e+06	999	9.96434	1.83292e-06	5.73686
P62835	Ras-related protein Rap-1A OS=Mus musculus OX=10090 GN=Rap1a PE=1 SV=1	Rap1a	0	0	0	0	0	1.42623e+06	2.05507e+06	1.59837e+06	1.1992e+06	1.75767e+06	0	1.60731e+06	999	9.96434	1.99326e-06	5.70044
P70404	Isocitrate dehydrogenase [NAD] subunit gamma 1, mitochondrial OS=Mus musculus OX=10090 GN=Idh3g PE=1 SV=1	Idh3g	0	0	0	0	0	1.31166e+06	2.00659e+06	1.66955e+06	2.08923e+06	2.35715e+06	0	1.88684e+06	999	9.96434	3.0968e-06	5.50909
O08749	Dihydrolipoyl dehydrogenase, mitochondrial OS=Mus musculus OX=10090 GN=Dld PE=1 SV=2	Dld	0	0	0	0	0	1.16932e+06	1.77669e+06	1.72133e+06	2.29541e+06	1.66113e+06	0	1.72478e+06	999	9.96434	5.59851e-06	5.25193
Q4FZC9	Nesprin-3 OS=Mus musculus OX=10090 GN=Syne3 PE=1 SV=1	4831426I19Rik; Syne3	0	0	0	0	0	925774	1.84204e+06	1.80214e+06	1.92164e+06	2.24516e+06	0	1.74735e+06	999	9.96434	2.27543e-05	4.64294
Q8BNV1	tRNA (uracil-5-)-methyltransferase homolog A OS=Mus musculus OX=10090 GN=Trmt2a PE=1 SV=1	Trmt2a	0	0	0	0	0	0	1.6034e+06	1.80864e+06	1.35863e+06	1.38194e+06	0	1.23052e+06	999	9.96434	0.00238596	2.62234
Q91YR7	Pre-mRNA-processing factor 6 OS=Mus musculus OX=10090 GN=Prpf6 PE=1 SV=1	Prpf6	0	0	0	0	0	1.8004e+06	1.88369e+06	2.5522e+06	1.86836e+06	0	0	1.62093e+06	999	9.96434	0.00265365	2.57616
O08807	Peroxiredoxin-4 OS=Mus musculus OX=10090 GN=Prdx4 PE=1 SV=1	Prdx4	0	0	0	0	0	1.82696e+06	1.23024e+06	1.27876e+06	1.42879e+06	0	0	1.15295e+06	999	9.96434	0.002776	2.55658
Q8C156	Condensin complex subunit 2 OS=Mus musculus OX=10090 GN=Ncaph PE=1 SV=1	Ncaph	0	0	0	0	0	3.44167e+06	2.8396e+06	5.32172e+06	0	3.2344e+06	0	2.96748e+06	999	9.96434	0.00424654	2.37196
Q9D8U8	Sorting nexin-5 OS=Mus musculus OX=10090 GN=Snx5 PE=1 SV=1	Snx5	0	0	0	0	0	1.36368e+06	2.38057e+06	1.20367e+06	1.70856e+06	0	0	1.3313e+06	999	9.96434	0.00455308	2.34169
Q5SSI6	U3 small nucleolar RNA-associated protein 18 homolog OS=Mus musculus OX=10090 GN=Utp18 PE=1 SV=1	Utp18	0	0	0	0	0	1.47127e+06	0	3.6991e+06	4.21086e+06	4.13336e+06	0	2.70292e+06	999	9.96434	0.00616455	2.2101
Q09014	Neutrophil cytosol factor 1 OS=Mus musculus OX=10090 GN=Ncf1 PE=1 SV=3	Ncf1	0	0	0	0	0	0	930775	2.36934e+06	1.45136e+06	2.47576e+06	0	1.44545e+06	999	9.96434	0.00702359	2.15344
P28474	Alcohol dehydrogenase class-3 OS=Mus musculus OX=10090 GN=Adh5 PE=1 SV=3	Adh5	0	0	0	0	0	0	1.95304e+06	1.79403e+06	1.71407e+06	0	0	1.09223e+06	999	9.96434	0.0202688	1.69317
Q9CXT8	Mitochondrial-processing peptidase subunit beta OS=Mus musculus OX=10090 GN=Pmpcb PE=1 SV=1	Pmpcb	0	0	0	0	0	0	0	1.8313e+06	1.43447e+06	1.58218e+06	0	969590	999	9.96434	0.0209695	1.67841
O08638	Myosin-11 OS=Mus musculus OX=10090 GN=Myh11 PE=1 SV=1	Myh11	0	0	0	0	0	6.03956e+06	5.46012e+06	0	7.86939e+06	0	0	3.87381e+06	999	9.96434	0.0224285	1.6492
Q9R0Q7	Prostaglandin E synthase 3 OS=Mus musculus OX=10090 GN=Ptges3 PE=1 SV=1	Ptges3; Gm9769; Ptges3-ps; LOC100048119; LOC102641464	0	0	0	0	0	0	1.69415e+06	3.05383e+06	2.11237e+06	0	0	1.37207e+06	999	9.96434	0.0260506	1.58418
Q62418	Drebrin-like protein OS=Mus musculus OX=10090 GN=Dbnl PE=1 SV=2	Dbnl	0	0	0	0	0	0	1.00944e+06	0	1.20247e+06	634141	0	569209	999	9.96434	0.0260542	1.58412
Q921N6	Probable ATP-dependent RNA helicase DDX27 OS=Mus musculus OX=10090 GN=Ddx27 PE=1 SV=3	Ddx27	0	0	0	0	0	321656	0	0	345706	91791.5	0	151831	999	9.96434	0.0407317	1.39007
Q60864	Stress-induced-phosphoprotein 1 OS=Mus musculus OX=10090 GN=Stip1 PE=1 SV=1	Stip1	0	0	0	1.4586e+06	0	5.97505e+06	6.15075e+06	6.54017e+06	6.50454e+06	6.91757e+06	291720	6.41762e+06	999	9.96434	4.09296e-08	7.38796
Q9WVR4	Fragile X mental retardation syndrome-related protein 2 OS=Mus musculus OX=10090 GN=Fxr2 PE=1 SV=1	Fxr2	967135	0	0	0	0	1.24472e+06	0	4.42521e+06	5.12207e+06	1.55198e+06	193427	2.46879e+06	12.7634	3.67395	0.02634	1.57938
Q922Q4	Pyrroline-5-carboxylate reductase 2 OS=Mus musculus OX=10090 GN=Pycr2 PE=1 SV=1	Pycr2	0	0	0	0	1.00828e+06	2.22316e+06	2.80451e+06	2.22384e+06	2.1544e+06	3.24499e+06	201655	2.53018e+06	12.5471	3.64928	2.34726e-05	4.62944
P56546	C-terminal-binding protein 2 OS=Mus musculus OX=10090 GN=Ctbp2 PE=1 SV=2	Ctbp2	0	0	710085	0	0	1.129e+06	1.84734e+06	1.16967e+06	1.83638e+06	1.68632e+06	142017	1.53374e+06	10.7997	3.43292	9.26827e-05	4.033
Q9WUU7	Cathepsin Z OS=Mus musculus OX=10090 GN=Ctsz PE=1 SV=1	Ctsz	107156	0	0	0	0	161555	0	211934	520011	257669	21431.3	230234	10.7429	3.42531	0.0217447	1.66265
O70318	Band 4.1-like protein 2 OS=Mus musculus OX=10090 GN=Epb41l2 PE=1 SV=2	Epb4.1l2; Epb41l2	0	0	734093	1.05002e+06	0	4.31143e+06	3.80738e+06	3.5414e+06	3.30261e+06	2.94097e+06	356822	3.58076e+06	10.0351	3.32699	4.24063e-06	5.37257
Q7TT37	Elongator complex protein 1 OS=Mus musculus OX=10090 GN=Elp1 PE=1 SV=2	Ikbkap	0	705650	0	0	0	1.16415e+06	1.18802e+06	1.26608e+06	1.41466e+06	1.40462e+06	141130	1.28751e+06	9.12283	3.18948	3.12209e-05	4.50556
Q6PAC3	DDB1- and CUL4-associated factor 13 OS=Mus musculus OX=10090 GN=Dcaf13 PE=2 SV=2	Dcaf13	817301	973137	0	0	0	3.59369e+06	0	4.86494e+06	3.80557e+06	3.37047e+06	358088	3.12693e+06	8.73232	3.12636	0.00584414	2.23328
Q9R1X4	Protein timeless homolog OS=Mus musculus OX=10090 GN=Timeless PE=1 SV=3	Timeless	853941	0	0	0	0	1.58683e+06	2.08063e+06	1.88258e+06	0	1.1154e+06	170788	1.33309e+06	7.80551	2.96449	0.0107863	1.96713
P47957	Adenine phosphoribosyltransferase OS=Mus spicilegus OX=10103 GN=Aprt PE=3 SV=1		0	623847	761911	0	0	2.22805e+06	1.97532e+06	2.04126e+06	1.89421e+06	2.31892e+06	277152	2.09155e+06	7.5466	2.91583	5.64816e-06	5.24809
Q8K012	Formin-binding protein 1-like OS=Mus musculus OX=10090 GN=Fnbp1l PE=1 SV=2	Fnbp1l	0	794063	0	0	0	1.31096e+06	741836	2.30091e+06	1.28005e+06	0	158813	1.12675e+06	7.09484	2.82677	0.0229022	1.64012
Q810B6	Rabankyrin-5 OS=Mus musculus OX=10090 GN=Ankfy1 PE=1 SV=2	Ankfy1	0	2.55193e+06	0	1.75464e+06	0	6.41488e+06	4.59042e+06	3.91912e+06	5.14914e+06	9.17313e+06	861314	5.84934e+06	6.79118	2.76366	0.00082631	3.08286
A2AGT5	Cytoskeleton-associated protein 5 OS=Mus musculus OX=10090 GN=Ckap5 PE=1 SV=1	Ckap5	0	1.89624e+06	0	0	0	5.12147e+06	1.30796e+06	1.65188e+06	4.74622e+06	0	379249	2.56551e+06	6.76471	2.75803	0.0383387	1.41636
P97760	DNA-directed RNA polymerase II subunit RPB3 OS=Mus musculus OX=10090 GN=Polr2c PE=1 SV=2	Polr2c	1.87233e+06	0	0	0	0	3.38153e+06	0	2.57733e+06	2.02562e+06	4.64257e+06	374466	2.52541e+06	6.74403	2.75361	0.0180953	1.74243
P98078	Disabled homolog 2 OS=Mus musculus OX=10090 GN=Dab2 PE=1 SV=2	Dab2	0	0	1.45512e+06	2.35896e+06	0	0	8.27959e+06	5.20879e+06	4.03924e+06	4.79471e+06	762815	4.46446e+06	5.85262	2.54908	0.0154665	1.81061
Q64012	RNA-binding protein Raly OS=Mus musculus OX=10090 GN=Raly PE=1 SV=3	Raly	1.42147e+06	0	0	0	0	1.52592e+06	2.49274e+06	1.62465e+06	996466	1.63473e+06	284294	1.6549e+06	5.82109	2.54129	0.00309647	2.50913
Q8BK64	Activator of 90 kDa heat shock protein ATPase homolog 1 OS=Mus musculus OX=10090 GN=Ahsa1 PE=1 SV=2	Ahsa1	0	0	724598	0	0	1.0532e+06	1.01615e+06	1.03753e+06	892563	0	144920	799888	5.51953	2.46455	0.0149764	1.82459
P63154	Crooked neck-like protein 1 OS=Mus musculus OX=10090 GN=Crnkl1 PE=1 SV=1	Crnkl1	1.57858e+06	1.05211e+06	1.3156e+06	0	0	6.06592e+06	3.31871e+06	3.74613e+06	3.84998e+06	2.49246e+06	789258	3.89464e+06	4.93456	2.30292	0.000917793	3.03726
Q8R3N6	THO complex subunit 1 OS=Mus musculus OX=10090 GN=Thoc1 PE=1 SV=1	Thoc1	4.1907e+06	0	0	0	0	3.35175e+06	3.11387e+06	4.3405e+06	3.35508e+06	5.90101e+06	838140	4.01244e+06	4.78732	2.25922	0.00609193	2.21524
P70388	DNA repair protein RAD50 OS=Mus musculus OX=10090 GN=Rad50 PE=1 SV=1	Rad50	0	665888	1.18826e+06	0	0	0	1.81438e+06	1.87637e+06	2.42963e+06	2.13934e+06	370829	1.65194e+06	4.45473	2.15534	0.0155466	1.80837
Q9DCT2	NADH dehydrogenase [ubiquinone] iron-sulfur protein 3, mitochondrial OS=Mus musculus OX=10090 GN=Ndufs3 PE=1 SV=2	Ndufs3	590990	573104	399911	383461	903667	517448	792914	2.90686e+06	3.5334e+06	4.76497e+06	570227	2.50312e+06	4.38969	2.13412	0.0228773	1.6406
Q9JII6	Aldo-keto reductase family 1 member A1 OS=Mus musculus OX=10090 GN=Akr1a1 PE=1 SV=3	Akr1a1	0	0	0	2.06307e+06	0	0	2.11564e+06	1.67788e+06	2.26613e+06	2.84046e+06	412613	1.78002e+06	4.31402	2.10903	0.0316722	1.49932
Q5XJY5	Coatomer subunit delta OS=Mus musculus OX=10090 GN=Arcn1 PE=1 SV=2	Arcn1	0	0	0	0	1.63288e+06	1.69123e+06	1.9808e+06	1.66123e+06	0	1.61601e+06	326575	1.38985e+06	4.25585	2.08945	0.0290405	1.537
Q62376	U1 small nuclear ribonucleoprotein 70 kDa OS=Mus musculus OX=10090 GN=Snrnp70 PE=1 SV=2	Snrnp70	0	0	0	0	193028	257140	178813	154738	0	226717	38605.7	163482	4.23465	2.08224	0.03359	1.47379
Q8C4J7	Transducin beta-like protein 3 OS=Mus musculus OX=10090 GN=Tbl3 PE=2 SV=1	Tbl3	0	452684	0	506450	0	991165	1.01512e+06	748459	604266	646122	191827	801027	4.17578	2.06205	0.0015406	2.81231
P16110	Galectin-3 OS=Mus musculus OX=10090 GN=Lgals3 PE=1 SV=3	Lgals3	0	0	1.61109e+06	0	1.37386e+06	2.43407e+06	1.48501e+06	2.05159e+06	2.86191e+06	3.54316e+06	596990	2.47515e+06	4.14604	2.05173	0.00302048	2.51992
Q9CZR8	Elongation factor Ts, mitochondrial OS=Mus musculus OX=10090 GN=Tsfm PE=1 SV=1	Tsfm	1.06227e+06	0	1.18644e+06	0	0	1.2863e+06	2.75098e+06	1.39244e+06	1.0114e+06	2.71755e+06	449743	1.83173e+06	4.07285	2.02604	0.00887686	2.05174
Q9QXX4	Calcium-binding mitochondrial carrier protein Aralar2 OS=Mus musculus OX=10090 GN=Slc25a13 PE=1 SV=1	Slc25a13	0	0	1.3522e+06	0	1.90771e+06	2.20852e+06	3.17231e+06	3.16024e+06	3.26851e+06	1.39036e+06	651982	2.63999e+06	4.04918	2.01763	0.00340217	2.46824
Q99N69	Leupaxin OS=Mus musculus OX=10090 GN=Lpxn PE=1 SV=2	Lpxn	0	214668	190653	0	0	298616	398466	0	406357	466992	81064.3	314086	3.87453	1.95402	0.021361	1.67038
Q8CFE2	Histone PARylation factor 1 OS=Mus musculus OX=10090 GN=Hpf1 PE=1 SV=1	2700029M09Rik; Hpf1	1.586e+06	1.53513e+06	1.825e+06	0	1.55584e+06	1.36835e+06	7.76757e+06	4.73935e+06	7.26792e+06	2.39285e+06	1.30039e+06	4.70721e+06	3.61983	1.85592	0.0160495	1.79454
P46977	Dolichyl-diphosphooligosaccharide--protein glycosyltransferase subunit STT3A OS=Homo sapiens OX=9606 GN=STT3A PE=1 SV=2	STT3A	388344	259154	0	0	0	465024	598890	380039	395266	479535	129500	463751	3.5811	1.8404	0.00307637	2.51196
Q5SUF2	Luc7-like protein 3 OS=Mus musculus OX=10090 GN=Luc7l3 PE=1 SV=1	Luc7l3	0	2.37715e+06	1.66997e+06	0	1.04399e+06	4.13141e+06	3.82093e+06	2.62901e+06	3.94729e+06	3.10276e+06	1.01822e+06	3.52628e+06	3.46318	1.7921	0.000884334	3.05338
P46087	Probable 28S rRNA (cytosine(4447)-C(5))-methyltransferase OS=Homo sapiens OX=9606 GN=NOP2 PE=1 SV=2	NOP2	0	148881	0	0	252667	182824	381501	358297	451424	0	80309.7	274809	3.42187	1.77478	0.0396433	1.40183
Q8BHB4	WD repeat-containing protein 3 OS=Mus musculus OX=10090 GN=Wdr3 PE=1 SV=1	Wdr3	1.29822e+06	0	0	0	1.09202e+06	1.85253e+06	1.11753e+06	2.34415e+06	1.44224e+06	1.36174e+06	478048	1.62364e+06	3.39639	1.764	0.0069166	2.16011
P11440	Cyclin-dependent kinase 1 OS=Mus musculus OX=10090 GN=Cdk1 PE=1 SV=3	Cdk1	87380.8	0	43761.3	0	55552.1	133506	148351	0	181669	160903	37338.8	124886	3.34466	1.74186	0.0212785	1.67206
P33609	DNA polymerase alpha catalytic subunit OS=Mus musculus OX=10090 GN=Pola1 PE=1 SV=2	Pola1	0	798991	0	0	1484235	0	2.31796e+06	1.47679e+06	1.97916e+06	1.35547e+06	456645	1.42588e+06	3.1225	1.6427	0.0435003	1.36151
Q8R5C5	Beta-centractin OS=Mus musculus OX=10090 GN=Actr1b PE=1 SV=1	Actr1b	2.95082e+06	978391	685699	0	0	3.08731e+06	3.2163e+06	2.53788e+06	2.28357e+06	3.26614e+06	922982	2.87824e+06	3.11841	1.64081	0.00474978	2.32333
Q8K3H0	DCC-interacting protein 13-alpha OS=Mus musculus OX=10090 GN=Appl1 PE=1 SV=1	Appl1	2.56315e+06	1.15604e+06	0	0	1.18965e+06	2.43883e+06	1.60035e+06	1.81749e+06	6.13077e+06	3.22321e+06	981769	3.04213e+06	3.09862	1.63163	0.0308714	1.51044
O35609	Secretory carrier-associated membrane protein 3 OS=Mus musculus OX=10090 GN=Scamp3 PE=1 SV=3	Scamp3	0	0	0	1.15552e+06	1.42596e+06	1.77712e+06	2.19192e+06	1.6457e+06	2.33358e+06	0	516296	1.58966e+06	3.07898	1.62245	0.037624	1.42454
Q8K1J6	CCA tRNA nucleotidyltransferase 1, mitochondrial OS=Mus musculus OX=10090 GN=Trnt1 PE=1 SV=1	Trnt1	1.76465e+06	435277	203240	0	0	1.61911e+06	0	1.54167e+06	1.98744e+06	2.12619e+06	480633	1.45488e+06	3.02701	1.59789	0.0445834	1.35083
Q91WS0	CDGSH iron-sulfur domain-containing protein 1 OS=Mus musculus OX=10090 GN=Cisd1 PE=1 SV=1	Cisd1	4.4397e+06	874192	1.65703e+06	875254	4.11389e+06	3.42251e+06	7.86412e+06	7.42208e+06	9.95765e+06	5.7673e+06	2.39201e+06	6.88673e+06	2.87905	1.5256	0.00511884	2.29083
Q60737	Casein kinase II subunit alpha OS=Mus musculus OX=10090 GN=Csnk2a1 PE=1 SV=2	Csnk2a1	801530	502867	0	0	0	704397	802580	600278	291042	1.14427e+06	260880	708514	2.71587	1.44141	0.036395	1.43896
O88351	Inhibitor of nuclear factor kappa-B kinase subunit beta OS=Mus musculus OX=10090 GN=Ikbkb PE=1 SV=1	Ikbkb	1.03583e+07	1.08858e+06	1.55984e+06	2.04255e+06	2596782	9.36432e+06	6.8883e+06	1.0874e+07	1.11078e+07	9.37193e+06	3.52922e+06	9.52127e+06	2.69784	1.43181	0.00646956	2.18913
Q8BWT1	3-ketoacyl-CoA thiolase, mitochondrial OS=Mus musculus OX=10090 GN=Acaa2 PE=1 SV=3	Acaa2	3.21804e+06	2.29301e+06	2.65835e+06	0	2.7569e+06	9.12682e+06	3.34649e+06	8.26667e+06	3.71882e+06	4.96694e+06	2.18526e+06	5.88515e+06	2.69311	1.42927	0.0113446	1.94521
Q9CXF4	TBC1 domain family member 15 OS=Mus musculus OX=10090 GN=Tbc1d15 PE=1 SV=1	Tbc1d15	1.84358e+06	2.71063e+06	1.9814e+06	0	0	4.62033e+06	2.18547e+06	2.47195e+06	3.17001e+06	4.68914e+06	1.30712e+06	3.42738e+06	2.62208	1.39071	0.0120336	1.91961
P19253	60S ribosomal protein L13a OS=Mus musculus OX=10090 GN=Rpl13a PE=1 SV=4	Rpl13a	212692	0	131737	0	231284	175070	226295	297644	272493	493690	115143	293038	2.545	1.34767	0.0212162	1.67333
P56960	Exosome component 10 OS=Mus musculus OX=10090 GN=Exosc10 PE=1 SV=2	Exosc10	1.70615e+06	958634	3.4102e+06	2.09823e+06	4.22166e+06	6.20515e+06	6.87815e+06	7.15061e+06	5.52129e+06	5.72958e+06	2.47898e+06	6.29696e+06	2.54014	1.34491	0.000225787	3.6463
Q6Q477	Plasma membrane calcium-transporting ATPase 4 OS=Mus musculus OX=10090 GN=Atp2b4 PE=1 SV=1	Atp2b4	0	1.31541e+06	1.21958e+06	1.02334e+06	1.94679e+06	2.44124e+06	2.10808e+06	1.22216e+06	3.94254e+06	3.94007e+06	1.10102e+06	2.73082e+06	2.48026	1.31049	0.0150548	1.82232
Q91VE6	MKI67 FHA domain-interacting nucleolar phosphoprotein OS=Mus musculus OX=10090 GN=Nifk PE=1 SV=1	Mki67ip; Nifk	0	0	1.13494e+06	2.3735e+06	0	1.23577e+06	1.57728e+06	1.5849e+06	1.91673e+06	2.26082e+06	701689	1.7151e+06	2.44425	1.28939	0.0393948	1.40456
Q8R2E9	ERO1-like protein beta OS=Mus musculus OX=10090 GN=Ero1b PE=1 SV=1	Ero1lb	2.91223e+06	2.79175e+06	5.82896e+06	0	5.17312e+06	1.08979e+07	6.75113e+06	7.85835e+06	2.97665e+06	1.14167e+07	3.34121e+06	7.98014e+06	2.3884	1.25604	0.0180619	1.74324
Q8BV66	Interferon-induced protein 44 OS=Mus musculus OX=10090 GN=Ifi44 PE=2 SV=1	Ifi44	3.62468e+06	553864	133791	0	3.73944e+06	2.08533e+06	5.16968e+06	2.88063e+06	5.28311e+06	3.80171e+06	1.61036e+06	3.84409e+06	2.38711	1.25526	0.0337302	1.47198
Q99LI7	Cleavage stimulation factor subunit 3 OS=Mus musculus OX=10090 GN=Cstf3 PE=1 SV=1	Cstf3	2.39955e+06	0	6.50765e+06	4.50905e+06	0	6.94229e+06	9.47689e+06	7.43598e+06	7.39567e+06	767329	2.68325e+06	6.40363e+06	2.38652	1.25491	0.0463649	1.33381
P46100	Transcriptional regulator ATRX OS=Homo sapiens OX=9606 GN=ATRX PE=1 SV=5	ATRX	3.16517e+06	4.75554e+06	0	3.39248e+06	0	7.5346e+06	5.70921e+06	5.86785e+06	3.61896e+06	3.39298e+06	2.26264e+06	5.22472e+06	2.30913	1.20735	0.0215847	1.66585
Q9QYG0	Protein NDRG2 OS=Mus musculus OX=10090 GN=Ndrg2 PE=1 SV=1	Ndrg2	0	1.7295e+06	809848	0	2.67511e+06	2.47711e+06	2.04035e+06	2.8521e+06	1.94074e+06	2.59752e+06	1.04289e+06	2.38156e+06	2.28362	1.19132	0.0198536	1.70216
Q922U1	U4/U6 small nuclear ribonucleoprotein Prp3 OS=Mus musculus OX=10090 GN=Prpf3 PE=1 SV=1	Prpf3	0	498840	0	508953	0	566905	360699	338035	476134	524656	201559	453286	2.2489	1.16922	0.0458207	1.33894
P70336	Rho-associated protein kinase 2 OS=Mus musculus OX=10090 GN=Rock2 PE=1 SV=1	Rock2	0	2.4928e+06	3.0133e+06	2.97706e+06	5.21376e+06	1.022e+07	5.30285e+06	4.44711e+06	6.34664e+06	4.41855e+06	2.73939e+06	6.14702e+06	2.24394	1.16604	0.0183543	1.73626
Q61792	LIM and SH3 domain protein 1 OS=Mus musculus OX=10090 GN=Lasp1 PE=1 SV=1	Lasp1	9.84178e+06	1.14047e+07	1.97928e+07	7.31834e+06	1.69886e+07	2.21843e+07	2.6143e+07	2.80706e+07	4.00325e+07	2.98117e+07	1.30692e+07	2.92484e+07	2.23796	1.16218	0.00132446	2.87796
Q9D0L8	mRNA cap guanine-N7 methyltransferase OS=Mus musculus OX=10090 GN=Rnmt PE=1 SV=1	Rnmt	0	971380	2.12089e+06	743831	1.38416e+06	2.89539e+06	3.13653e+06	1.22547e+06	2.72044e+06	1.41038e+06	1.04405e+06	2.27764e+06	2.18154	1.12535	0.0243091	1.61423
Q8BJY1	26S proteasome non-ATPase regulatory subunit 5 OS=Mus musculus OX=10090 GN=Psmd5 PE=1 SV=4	Psmd5	0	265494	137834	214703	407970	330583	495018	421588	544183	405029	205200	439280	2.14074	1.09811	0.0080816	2.0925
Q9QUI0	Transforming protein RhoA OS=Mus musculus OX=10090 GN=Rhoa PE=1 SV=1	Rhoa	0	693208	502564	471038	863662	878492	1.75681e+06	782309	812779	1.18434e+06	506094	1.08295e+06	2.13981	1.09748	0.0193189	1.71402
Q99M31	Heat shock 70 kDa protein 14 OS=Mus musculus OX=10090 GN=Hspa14 PE=1 SV=2	Hspa14	0	1.5047e+06	0	1.60221e+06	1.87852e+06	990717	2.51027e+06	3.43852e+06	1.70977e+06	2.01423e+06	997085	2.1327e+06	2.13894	1.09689	0.0430211	1.36632
P09528	Ferritin heavy chain OS=Mus musculus OX=10090 GN=Fth1 PE=1 SV=2	Fth1	8.57368e+06	6.98181e+06	7.86109e+06	4.62703e+06	6595491	9.73315e+06	8.02484e+06	1.2973e+07	1.36789e+07	2.93794e+07	6.92782e+06	1.47579e+07	2.13023	1.09101	0.0384597	1.41499
Q91WM3	U3 small nucleolar RNA-interacting protein 2 OS=Mus musculus OX=10090 GN=Rrp9 PE=1 SV=1	Rrp9	3.96252e+06	753789	858758	926565	2819701	2.90558e+06	2.90783e+06	3.13488e+06	4.31086e+06	6.51031e+06	1.86427e+06	3.95389e+06	2.12088	1.08467	0.0292787	1.53345
Q91W90	Thioredoxin domain-containing protein 5 OS=Mus musculus OX=10090 GN=Txndc5 PE=1 SV=2	Txndc5	0	238743	167239	222982	383084	302876	459945	459609	362677	516061	202410	420233	2.07615	1.05391	0.00863805	2.06358
Q3UMY5	Echinoderm microtubule-associated protein-like 4 OS=Mus musculus OX=10090 GN=Eml4 PE=1 SV=1	Eml4	1.37091e+06	2.25904e+06	1.05999e+06	956216	1.81955e+06	870872	3.72333e+06	3.29443e+06	3.44893e+06	4.13463e+06	1.49314e+06	3.09444e+06	2.07243	1.05133	0.0165937	1.78006
B1AZI6	THO complex subunit 2 OS=Mus musculus OX=10090 GN=Thoc2 PE=1 SV=1	Thoc2	3.29471e+06	2.18761e+06	2.13039e+06	0	3.08152e+06	5.37549e+06	4.96712e+06	3.9249e+06	2.10415e+06	5.76324e+06	2.13885e+06	4.42698e+06	2.0698	1.04949	0.0156784	1.8047
Q9CXW4	60S ribosomal protein L11 OS=Mus musculus OX=10090 GN=Rpl11 PE=1 SV=4	Rpl11	3.0818e+06	2.42929e+06	2.97687e+06	0	6.37857e+06	7.14539e+06	8.09273e+06	3.59128e+06	6.23625e+06	5.6536e+06	2.97331e+06	6.14385e+06	2.06634	1.04707	0.0186304	1.72978
P70460	Vasodilator-stimulated phosphoprotein OS=Mus musculus OX=10090 GN=Vasp PE=1 SV=4	Vasp	339376	544517	966117	363563	2265249	1.84281e+06	2.14385e+06	1.6575e+06	1.94654e+06	1.63866e+06	895764	1.84587e+06	2.06067	1.04311	0.0170566	1.76811
Q9CQC9	GTP-binding protein SAR1b OS=Mus musculus OX=10090 GN=Sar1b PE=1 SV=1	Sar1b	3.85099e+06	2.66148e+06	0	1.66655e+06	1.84019e+06	4.79195e+06	3.38574e+06	3.07659e+06	4.90446e+06	4.46776e+06	2.00384e+06	4.1253e+06	2.0587	1.04173	0.0101803	1.99224
Q9JK91	DNA mismatch repair protein Mlh1 OS=Mus musculus OX=10090 GN=Mlh1 PE=1 SV=2	Mlh1	6.85792e+06	6.01305e+06	5.96699e+06	3.05508e+06	5.98036e+06	1.18157e+07	1.48738e+07	1.39459e+07	5.18885e+06	1.09086e+07	5.57468e+06	1.13466e+07	2.03538	1.0253	0.00653284	2.1849
Q8R3C6	Probable RNA-binding protein 19 OS=Mus musculus OX=10090 GN=Rbm19 PE=1 SV=1	Rbm19	0	0	278508	224154	266456	265822	312356	372079	300676	305040	153824	311195	2.02306	1.01654	0.0217888	1.66177
Q9DBZ5	Eukaryotic translation initiation factor 3 subunit K OS=Mus musculus OX=10090 GN=Eif3k PE=1 SV=1	Eif3k	2.46671e+06	0	4.099e+06	0	3.30125e+06	4.57534e+06	3.85757e+06	4.63935e+06	3.12672e+06	3.63427e+06	1.97339e+06	3.96665e+06	2.01007	1.00724	0.0281034	1.55124

## Sheet: Raw Data
Accession	Description	Biological Process	Cellular Component	Molecular Function	Gene Symbol	KEGG Pathways	WikiPathways	Abundances (Normalized): F1: Control, 1	Abundances (Normalized): F2: Control, 2	Abundances (Normalized): F3: Control, 3	Abundances (Normalized): F4: Control, 4	Abundances (Normalized): F5: Control, 5	Abundances (Normalized): F6: Sample, 1	Abundances (Normalized): F7: Sample, 2	Abundances (Normalized): F8: Sample, 3	Abundances (Normalized): F9: Sample, 4	Abundances (Normalized): F10: Sample, 5
Q6PDG5	SWI/SNF complex subunit SMARCC2 OS=Mus musculus OX=10090 GN=Smarcc2 PE=1 SV=2	cell organization and biogenesis;metabolic process;regulation of biological process	nucleus	DNA binding;protein binding	Smarcc2		TNF-alpha NF-kB Signaling Pathway	0	0	0	0	0	0	0	0	0	4.18629e+06
O08788	Dynactin subunit 1 OS=Mus musculus OX=10090 GN=Dctn1 PE=1 SV=3	cell division;cell organization and biogenesis;cellular component movement;regulation of biological process;transport	chromosome;cytoplasm;cytoskeleton;cytosol;membrane;nucleus	catalytic activity;motor activity;protein binding	Dctn1	Huntington's disease; Vasopressin-regulated water reabsorption		0	0	0	0	0	0	0	0	2.52528e+06	3.9903e+06
P62280	40S ribosomal protein S11 OS=Homo sapiens OX=9606 GN=RPS11 PE=1 SV=3	cell differentiation;cell organization and biogenesis;metabolic process;transport	cytoplasm;cytosol;membrane;ribosome	protein binding;RNA binding;structural molecule activity	RPS11	Ribosome	Cytoplasmic Ribosomal Proteins	0	0	0	0	0	0	0	0	3.55998e+06	3.438e+06
Q9DC51	Guanine nucleotide-binding protein G(i) subunit alpha OS=Mus musculus OX=10090 GN=Gnai3 PE=1 SV=3	cell division;cell organization and biogenesis;metabolic process;regulation of biological process;response to stimulus	cytoplasm;cytoskeleton;Golgi;membrane;nucleus	catalytic activity;metal ion binding;nucleotide binding;protein binding;signal transducer activity	Gnai3	Oxytocin signaling pathway; Leukocyte transendothelial migration; Morphine addiction; Cholinergic synapse; Chagas disease (American trypanosomiasis); Retrograde endocannabinoid signaling; Dopaminergic synapse; Progesterone-mediated oocyte maturation; GABAergic synapse; Regulation of lipolysis in adipocytes; Toxoplasmosis; Chemokine signaling pathway; Platelet activation; Melanogenesis; Axon guida…	Chemokine signaling pathway; G Protein Signaling Pathways; Calcium Regulation in the Cardiac Cell; Signal Transduction of S1P Receptor	0	0	0	0	0	0	0	681619	781683	0
Q9CXT8	Mitochondrial-processing peptidase subunit beta OS=Mus musculus OX=10090 GN=Pmpcb PE=1 SV=1	metabolic process	membrane;mitochondrion;organelle lumen	catalytic activity;metal ion binding	Pmpcb			0	0	0	0	0	0	0	1.8313e+06	1.43447e+06	1.58218e+06
Q8UN02	Glyco-Gag protein OS=Moloney murine leukemia virus (strain neuropathogenic variant ts1-92b) OX=882209 GN=gag PE=3 SV=2	cell organization and biogenesis	extracellular;membrane	metal ion binding;structural molecule activity				0	0	0	0	0	0	0	2.13972e+06	1.92498e+06	2.61146e+06
P15532	Nucleoside diphosphate kinase A OS=Mus musculus OX=10090 GN=Nme1 PE=1 SV=1	cell differentiation;cellular homeostasis;metabolic process;regulation of biological process;response to stimulus;transport	cytoplasm;cytosol;membrane;mitochondrion;nucleus	catalytic activity;DNA binding;metal ion binding;nucleotide binding;protein binding;RNA binding	Nme1	Metabolic pathways; Purine metabolism; Pyrimidine metabolism	Purine metabolism	0	0	0	0	0	0	0	2.80725e+06	0	0
Q9Z2U0	Proteasome subunit alpha type-7 OS=Mus musculus OX=10090 GN=Psma7 PE=1 SV=1	metabolic process	cytoplasm;cytosol;nucleus;proteasome	catalytic activity;protein binding	Psma7	Proteasome	Proteasome Degradation	0	0	0	0	0	0	174117	0	0	0
Q09014	Neutrophil cytosol factor 1 OS=Mus musculus OX=10090 GN=Ncf1 PE=1 SV=3	cell death;cell organization and biogenesis;cell proliferation;defense response;metabolic process;regulation of biological process;response to stimulus;transport	cytoplasm;cytosol;endoplasmic reticulum;Golgi;membrane	catalytic activity;enzyme regulator activity;protein binding	Ncf1	Leukocyte transendothelial migration; Chemokine signaling pathway; Osteoclast differentiation; Phagosome; Fc gamma R-mediated phagocytosis; Leishmaniasis	Chemokine signaling pathway; Microglia Pathogen Phagocytosis Pathway	0	0	0	0	0	0	930775	2.36934e+06	1.45136e+06	2.47576e+06
Q62418	Drebrin-like protein OS=Mus musculus OX=10090 GN=Dbnl PE=1 SV=2	cell organization and biogenesis;regulation of biological process;response to stimulus;transport	cytoplasm;cytoskeleton;cytosol;endosome;Golgi;membrane	protein binding	Dbnl			0	0	0	0	0	0	1.00944e+06	0	1.20247e+06	634141
Q8BNV1	tRNA (uracil-5-)-methyltransferase homolog A OS=Mus musculus OX=10090 GN=Trmt2a PE=1 SV=1	metabolic process		catalytic activity;RNA binding	Trmt2a		mRNA processing	0	0	0	0	0	0	1.6034e+06	1.80864e+06	1.35863e+06	1.38194e+06
Q9R0Q7	Prostaglandin E synthase 3 OS=Mus musculus OX=10090 GN=Ptges3 PE=1 SV=1	cell organization and biogenesis;cell proliferation;metabolic process;regulation of biological process;response to stimulus	cytoplasm;cytosol;nucleus	catalytic activity;protein binding	Ptges3; Gm9769; Ptges3-ps; LOC100048119; LOC102641464	Metabolic pathways; Arachidonic acid metabolism		0	0	0	0	0	0	1.69415e+06	3.05383e+06	2.11237e+06	0
Q05639	Elongation factor 1-alpha 2 OS=Homo sapiens OX=9606 GN=EEF1A2 PE=1 SV=1	metabolic process;regulation of biological process;response to stimulus	cytoplasm;nucleus	catalytic activity;nucleotide binding;protein binding;RNA binding	EEF1A2	RNA transport; Legionellosis	Translation Factors	0	0	0	0	0	0	1.74234e+06	0	3.81075e+06	0
P28474	Alcohol dehydrogenase class-3 OS=Mus musculus OX=10090 GN=Adh5 PE=1 SV=3	metabolic process;response to stimulus	cytoplasm;mitochondrion;nucleus	catalytic activity;metal ion binding;protein binding	Adh5	Drug metabolism - cytochrome P450; Retinol metabolism; Metabolic pathways; Fatty acid degradation; Glycolysis / Gluconeogenesis; Carbon metabolism; Chemical carcinogenesis; Tyrosine metabolism; Metabolism of xenobiotics by cytochrome P450		0	0	0	0	0	0	1.95304e+06	1.79403e+06	1.71407e+06	0
Q80X41	Serine/threonine-protein kinase VRK1 OS=Mus musculus OX=10090 GN=Vrk1 PE=1 SV=2	cell division;cell organization and biogenesis;metabolic process;regulation of biological process	cytoplasm;cytoskeleton;cytosol;nucleus	catalytic activity;nucleotide binding;protein binding	Vrk1			0	0	0	0	0	0	2.41496e+06	2.49486e+06	0	0
E9Q634	Unconventional myosin-Ie OS=Mus musculus OX=10090 GN=Myo1e PE=1 SV=1	cell differentiation;cell organization and biogenesis;metabolic process;regulation of biological process;response to stimulus;transport	cytoplasm;cytoskeleton	catalytic activity;motor activity;nucleotide binding;protein binding	Myo1e		Primary Focal Segmental Glomerulosclerosis FSGS	0	0	0	0	0	0	2.97368e+06	0	1.25563e+06	0
O70145	Neutrophil cytosol factor 2 OS=Mus musculus OX=10090 GN=Ncf2 PE=1 SV=1	metabolic process;regulation of biological process;response to stimulus;transport	cytoplasm;cytosol;membrane	catalytic activity;enzyme regulator activity;protein binding	Ncf2	Leukocyte transendothelial migration; Osteoclast differentiation; Phagosome; Leishmaniasis	TYROBP Causal Network; Microglia Pathogen Phagocytosis Pathway	0	0	0	0	0	0	3.76805e+06	0	0	9.20392e+06
Q921N6	Probable ATP-dependent RNA helicase DDX27 OS=Mus musculus OX=10090 GN=Ddx27 PE=1 SV=3	metabolic process	chromosome;cytoplasm;nucleus	catalytic activity;nucleotide binding;RNA binding	Ddx27			0	0	0	0	0	321656	0	0	345706	91791.5
Q3UPF5	Zinc finger CCCH-type antiviral protein 1 OS=Mus musculus OX=10090 GN=Zc3hav1 PE=1 SV=1	defense response;regulation of biological process;response to stimulus	cytoplasm;cytosol;endosome;nucleus;vacuole	catalytic activity;metal ion binding;protein binding;RNA binding	Zc3hav1			0	0	0	0	0	520219	781142	734786	809458	729727
Q4FZC9	Nesprin-3 OS=Mus musculus OX=10090 GN=Syne3 PE=1 SV=1	cell organization and biogenesis;regulation of biological process	endoplasmic reticulum;membrane;nucleus	protein binding	4831426I19Rik; Syne3			0	0	0	0	0	925774	1.84204e+06	1.80214e+06	1.92164e+06	2.24516e+06
Q9QZL0	Receptor-interacting serine/threonine-protein kinase 3 OS=Mus musculus OX=10090 GN=Ripk3 PE=1 SV=2	cell death;cell differentiation;cell organization and biogenesis;metabolic process;regulation of biological process;response to stimulus	cytoplasm;cytosol;membrane;mitochondrion	catalytic activity;nucleotide binding;protein binding;signal transducer activity	Ripk3	TNF signaling pathway; NOD-like receptor signaling pathway; Cytosolic DNA-sensing pathway	TNF-alpha NF-kB Signaling Pathway	0	0	0	0	0	1.05138e+06	1.29778e+06	1.34551e+06	1.14157e+06	1.49676e+06
O08749	Dihydrolipoyl dehydrogenase, mitochondrial OS=Mus musculus OX=10090 GN=Dld PE=1 SV=2	cellular homeostasis;metabolic process;regulation of biological process	mitochondrion;organelle lumen	catalytic activity;nucleotide binding	Dld	Pyruvate metabolism; Citrate cycle (TCA cycle); Valine, leucine and isoleucine degradation; Metabolic pathways; Glycine, serine and threonine metabolism; Glycolysis / Gluconeogenesis; Propanoate metabolism; Carbon metabolism; Glyoxylate and dicarboxylate metabolism	Fatty Acid Beta Oxidation; Glycolysis and Gluconeogenesis; TCA Cycle	0	0	0	0	0	1.16932e+06	1.77669e+06	1.72133e+06	2.29541e+06	1.66113e+06
P70404	Isocitrate dehydrogenase [NAD] subunit gamma 1, mitochondrial OS=Mus musculus OX=10090 GN=Idh3g PE=1 SV=1	metabolic process;regulation of biological process	mitochondrion	catalytic activity;metal ion binding;nucleotide binding	Idh3g	Citrate cycle (TCA cycle); Metabolic pathways; Biosynthesis of amino acids; 2-Oxocarboxylic acid metabolism; Carbon metabolism	TCA Cycle	0	0	0	0	0	1.31166e+06	2.00659e+06	1.66955e+06	2.08923e+06	2.35715e+06
Q9D8U8	Sorting nexin-5 OS=Mus musculus OX=10090 GN=Snx5 PE=1 SV=1	cell organization and biogenesis;transport	cytoplasm;cytosol;endosome;membrane	protein binding	Snx5	Endocytosis		0	0	0	0	0	1.36368e+06	2.38057e+06	1.20367e+06	1.70856e+06	0
P62835	Ras-related protein Rap-1A OS=Mus musculus OX=10090 GN=Rap1a PE=1 SV=1	cellular homeostasis;regulation of biological process;response to stimulus;transport	cytoplasm;endosome;membrane	catalytic activity;nucleotide binding;protein binding;transporter activity	Rap1a	Leukocyte transendothelial migration; MAPK signaling pathway; Pancreatic secretion; Ras signaling pathway; Focal adhesion; Long-term potentiation; Chemokine signaling pathway; Platelet activation; Neurotrophin signaling pathway; Rap1 signaling pathway; cAMP signaling pathway; Renal cell carcinoma	Signaling of Hepatocyte Growth Factor Receptor; Chemokine signaling pathway; IL-3 Signaling Pathway; MAPK signaling pathway; Integrin-mediated Cell Adhesion; Focal Adhesion	0	0	0	0	0	1.42623e+06	2.05507e+06	1.59837e+06	1.1992e+06	1.75767e+06
Q5SSI6	U3 small nucleolar RNA-associated protein 18 homolog OS=Mus musculus OX=10090 GN=Utp18 PE=1 SV=1	metabolic process	membrane;nucleus	protein binding;RNA binding	Utp18	Ribosome biogenesis in eukaryotes		0	0	0	0	0	1.47127e+06	0	3.6991e+06	4.21086e+06	4.13336e+06
Q91YR7	Pre-mRNA-processing factor 6 OS=Mus musculus OX=10090 GN=Prpf6 PE=1 SV=1	cell organization and biogenesis;metabolic process;regulation of biological process	membrane;nucleus;spliceosomal complex	protein binding;RNA binding	Prpf6	Spliceosome	mRNA processing	0	0	0	0	0	1.8004e+06	1.88369e+06	2.5522e+06	1.86836e+06	0
O08807	Peroxiredoxin-4 OS=Mus musculus OX=10090 GN=Prdx4 PE=1 SV=1	cell organization and biogenesis;cellular homeostasis;metabolic process;regulation of biological process	cytoplasm;cytosol;endoplasmic reticulum;mitochondrion;nucleus	antioxidant activity;catalytic activity;protein binding	Prdx4			0	0	0	0	0	1.82696e+06	1.23024e+06	1.27876e+06	1.42879e+06	0
P25976	Nucleolar transcription factor 1 OS=Mus musculus OX=10090 GN=Ubtf PE=1 SV=1	metabolic process;regulation of biological process	nucleus	DNA binding;protein binding;RNA binding	Ubtf			0	0	0	0	0	1.89405e+06	0	2.17685e+06	0	0
Q505F5	Leucine-rich repeat-containing protein 47 OS=Mus musculus OX=10090 GN=Lrrc47 PE=1 SV=1	metabolic process		catalytic activity;protein binding;RNA binding	Lrrc47			0	0	0	0	0	2.1609e+06	0	0	3.33335e+06	0
Q99JI4	26S proteasome non-ATPase regulatory subunit 6 OS=Mus musculus OX=10090 GN=Psmd6 PE=1 SV=1	metabolic process;regulation of biological process	proteasome	enzyme regulator activity;protein binding	Psmd6	Proteasome; Epstein-Barr virus infection	TNF-alpha NF-kB Signaling Pathway; Proteasome Degradation	0	0	0	0	0	2.81989e+06	2.89904e+06	3.25202e+06	2.37041e+06	1.88338e+06
Q9DB20	ATP synthase subunit O, mitochondrial OS=Mus musculus OX=10090 GN=Atp5po PE=1 SV=1	metabolic process;transport	membrane;mitochondrion;nucleus	catalytic activity;protein binding;transporter activity	Atp5o; LOC100047429; LOC102641678	Metabolic pathways; Huntington's disease; Oxidative phosphorylation; Parkinson's disease; Alzheimer's disease	Oxidative phosphorylation; Electron Transport Chain	0	0	0	0	0	2.82549e+06	4.24523e+06	0	0	0
Q8C156	Condensin complex subunit 2 OS=Mus musculus OX=10090 GN=Ncaph PE=1 SV=1	cell division;cell organization and biogenesis;metabolic process;regulation of biological process	chromosome;cytoplasm;cytosol;membrane;nucleus	enzyme regulator activity;protein binding	Ncaph			0	0	0	0	0	3.44167e+06	2.8396e+06	5.32172e+06	0	3.2344e+06
Q8C1B7	Septin-11 OS=Mus musculus OX=10090 GN=Septin11 PE=1 SV=4	cell division;cell organization and biogenesis	cytoplasm;cytoskeleton	nucleotide binding;protein binding	2021-09-11	Bacterial invasion of epithelial cells		0	0	0	0	0	4.61786e+06	0	4.28388e+06	0	0
Q64337	Sequestosome-1 OS=Mus musculus OX=10090 GN=Sqstm1 PE=1 SV=1	cell communication;cell death;cell differentiation;cell organization and biogenesis;metabolic process;regulation of biological process;response to stimulus	cytoplasm;cytosol;endoplasmic reticulum;endosome;nucleus;vacuole	metal ion binding;protein binding	Sqstm1	Osteoclast differentiation	IL-1 Signaling Pathway	0	0	0	0	0	5.30961e+06	0	1.29231e+06	0	0
O08638	Myosin-11 OS=Mus musculus OX=10090 GN=Myh11 PE=1 SV=1	cell differentiation;cell organization and biogenesis;metabolic process;transport	cytoplasm;extracellular	catalytic activity;motor activity;nucleotide binding;protein binding;structural molecule activity	Myh11			0	0	0	0	0	6.03956e+06	5.46012e+06	0	7.86939e+06	0
Q60864	Stress-induced-phosphoprotein 1 OS=Mus musculus OX=10090 GN=Stip1 PE=1 SV=1		cytoplasm;cytosol;nucleus	protein binding;RNA binding	Stip1	Prion diseases		0	0	0	1.4586e+06	0	5.97505e+06	6.15075e+06	6.54017e+06	6.50454e+06	6.91757e+06
Q9WVR4	Fragile X mental retardation syndrome-related protein 2 OS=Mus musculus OX=10090 GN=Fxr2 PE=1 SV=1	regulation of biological process	cytoplasm;cytosol;membrane;nucleus	protein binding;RNA binding	Fxr2		mRNA processing	967135	0	0	0	0	1.24472e+06	0	4.42521e+06	5.12207e+06	1.55198e+06
Q922Q4	Pyrroline-5-carboxylate reductase 2 OS=Mus musculus OX=10090 GN=Pycr2 PE=1 SV=1	metabolic process;response to stimulus	cytoplasm;mitochondrion	catalytic activity;nucleotide binding	Pycr2	Arginine and proline metabolism; Metabolic pathways; Biosynthesis of amino acids		0	0	0	0	1.00828e+06	2.22316e+06	2.80451e+06	2.22384e+06	2.1544e+06	3.24499e+06
P56546	C-terminal-binding protein 2 OS=Mus musculus OX=10090 GN=Ctbp2 PE=1 SV=2	cell differentiation;metabolic process;regulation of biological process	cytosol;nucleus	catalytic activity;nucleotide binding;protein binding	Ctbp2	Wnt signaling pathway; Notch signaling pathway; Pathways in cancer; Chronic myeloid leukemia	PluriNetWork; Notch Signaling Pathway; Wnt Signaling Pathway NetPath; Wnt Signaling Pathway and Pluripotency	0	0	710085	0	0	1.129e+06	1.84734e+06	1.16967e+06	1.83638e+06	1.68632e+06
Q9WUU7	Cathepsin Z OS=Mus musculus OX=10090 GN=Ctsz PE=1 SV=1	metabolic process;regulation of biological process	cell surface;endoplasmic reticulum;vacuole	catalytic activity	Ctsz	Lysosome; Apoptosis		107156	0	0	0	0	161555	0	211934	520011	257669
O70318	Band 4.1-like protein 2 OS=Mus musculus OX=10090 GN=Epb41l2 PE=1 SV=2	cell division;cell organization and biogenesis;regulation of biological process;transport	cytoplasm;cytoskeleton;membrane;nucleus	protein binding;structural molecule activity	Epb4.1l2; Epb41l2	Tight junction	Splicing factor NOVA regulated synaptic proteins	0	0	734093	1.05002e+06	0	4.31143e+06	3.80738e+06	3.5414e+06	3.30261e+06	2.94097e+06
Q7TT37	Elongator complex protein 1 OS=Mus musculus OX=10090 GN=Elp1 PE=1 SV=2	metabolic process;regulation of biological process	cytoplasm;cytosol;nucleus	catalytic activity;enzyme regulator activity;nucleotide binding;protein binding	Ikbkap		TNF-alpha NF-kB Signaling Pathway; IL-1 Signaling Pathway	0	705650	0	0	0	1.16415e+06	1.18802e+06	1.26608e+06	1.41466e+06	1.40462e+06
Q6PAC3	DDB1- and CUL4-associated factor 13 OS=Mus musculus OX=10090 GN=Dcaf13 PE=2 SV=2	metabolic process	cytosol;nucleus	protein binding;RNA binding	Dcaf13			817301	973137	0	0	0	3.59369e+06	0	4.86494e+06	3.80557e+06	3.37047e+06
Q9R1X4	Protein timeless homolog OS=Mus musculus OX=10090 GN=Timeless PE=1 SV=3	cell division;development;metabolic process;regulation of biological process;response to stimulus	nucleus	protein binding	Timeless			853941	0	0	0	0	1.58683e+06	2.08063e+06	1.88258e+06	0	1.1154e+06
P47957	Adenine phosphoribosyltransferase OS=Mus spicilegus OX=10103 GN=Aprt PE=3 SV=1	metabolic process	cytoplasm	catalytic activity				0	623847	761911	0	0	2.22805e+06	1.97532e+06	2.04126e+06	1.89421e+06	2.31892e+06
Q8K012	Formin-binding protein 1-like OS=Mus musculus OX=10090 GN=Fnbp1l PE=1 SV=2	cell organization and biogenesis;metabolic process;transport	cytoplasm;cytoskeleton;membrane	protein binding	Fnbp1l			0	794063	0	0	0	1.31096e+06	741836	2.30091e+06	1.28005e+06	0
Q810B6	Rabankyrin-5 OS=Mus musculus OX=10090 GN=Ankfy1 PE=1 SV=2	cell organization and biogenesis;regulation of biological process;transport	cytoplasm;cytosol;endosome;membrane	metal ion binding;protein binding	Ankfy1			0	2.55193e+06	0	1.75464e+06	0	6.41488e+06	4.59042e+06	3.91912e+06	5.14914e+06	9.17313e+06
A2AGT5	Cytoskeleton-associated protein 5 OS=Mus musculus OX=10090 GN=Ckap5 PE=1 SV=1	cell division;cell organization and biogenesis;transport	chromosome;cytoplasm;cytoskeleton;membrane	protein binding	Ckap5			0	1.89624e+06	0	0	0	5.12147e+06	1.30796e+06	1.65188e+06	4.74622e+06	0
Q99JI6	Ras-related protein Rap-1b OS=Mus musculus OX=10090 GN=Rap1b PE=1 SV=2	cell proliferation;regulation of biological process;response to stimulus	cytoplasm;cytosol;membrane	catalytic activity;nucleotide binding;protein binding	Rap1b	Leukocyte transendothelial migration; MAPK signaling pathway; Pancreatic secretion; Ras signaling pathway; Focal adhesion; Long-term potentiation; Chemokine signaling pathway; Platelet activation; Neurotrophin signaling pathway; Rap1 signaling pathway; cAMP signaling pathway; Renal cell carcinoma	Signaling of Hepatocyte Growth Factor Receptor; Chemokine signaling pathway; MAPK signaling pathway; Integrin-mediated Cell Adhesion; Focal Adhesion	0	193110	781436	0	0	4.51729e+06	235417	216360	1.38024e+06	240624
P97760	DNA-directed RNA polymerase II subunit RPB3 OS=Mus musculus OX=10090 GN=Polr2c PE=1 SV=2	metabolic process	cytoplasm;cytoskeleton;cytosol;nucleus	catalytic activity;DNA binding;protein binding	Polr2c	RNA polymerase; Epstein-Barr virus infection; Metabolic pathways; Purine metabolism; Huntington's disease; Pyrimidine metabolism	Estrogen signaling; Purine metabolism; Eukaryotic Transcription Initiation	1.87233e+06	0	0	0	0	3.38153e+06	0	2.57733e+06	2.02562e+06	4.64257e+06
Q7TMQ7	WD repeat-containing protein 91 OS=Mus musculus OX=10090 GN=Wdr91 PE=1 SV=1	regulation of biological process;transport	cytosol;endosome;membrane	enzyme regulator activity;protein binding	Wdr91			6.63458e+06	0	0	1.84735e+06	0	1.80791e+07	0	0	2.37139e+07	1.01589e+07
P98078	Disabled homolog 2 OS=Mus musculus OX=10090 GN=Dab2 PE=1 SV=2	cell death;cell differentiation;cell organization and biogenesis;development;regulation of biological process;response to stimulus;transport	cytoplasm;membrane;nucleus	protein binding;receptor activity	Dab2	Endocytosis	Wnt Signaling Pathway NetPath	0	0	1.45512e+06	2.35896e+06	0	0	8.27959e+06	5.20879e+06	4.03924e+06	4.79471e+06
Q64012	RNA-binding protein Raly OS=Mus musculus OX=10090 GN=Raly PE=1 SV=3	metabolic process;regulation of biological process	nucleus;spliceosomal complex	RNA binding	Raly		mRNA processing	1.42147e+06	0	0	0	0	1.52592e+06	2.49274e+06	1.62465e+06	996466	1.63473e+06
Q8BK64	Activator of 90 kDa heat shock protein ATPase homolog 1 OS=Mus musculus OX=10090 GN=Ahsa1 PE=1 SV=2	metabolic process;regulation of biological process;response to stimulus	cytoplasm;cytosol;endoplasmic reticulum	enzyme regulator activity;protein binding	Ahsa1			0	0	724598	0	0	1.0532e+06	1.01615e+06	1.03753e+06	892563	0
Q9JHU9	Inositol-3-phosphate synthase 1 OS=Mus musculus OX=10090 GN=Isyna1 PE=1 SV=1	metabolic process	cytoplasm	catalytic activity	Isyna1	Metabolic pathways; Inositol phosphate metabolism		933592	0	0	1.66848e+06	0	1.76957e+06	1.24388e+07	0	0	0
Q922V4	Pleiotropic regulator 1 OS=Mus musculus OX=10090 GN=Plrg1 PE=1 SV=1	metabolic process;regulation of biological process	membrane;nucleus;spliceosomal complex	protein binding	Plrg1	Spliceosome		0	0	0	0	1.88797e+06	0	2.96424e+06	3.80744e+06	2.73282e+06	0
P63154	Crooked neck-like protein 1 OS=Mus musculus OX=10090 GN=Crnkl1 PE=1 SV=1	cell organization and biogenesis;metabolic process	nucleus;spliceosomal complex	protein binding;RNA binding	Crnkl1	Spliceosome		1.57858e+06	1.05211e+06	1.3156e+06	0	0	6.06592e+06	3.31871e+06	3.74613e+06	3.84998e+06	2.49246e+06
Q8R3N6	THO complex subunit 1 OS=Mus musculus OX=10090 GN=Thoc1 PE=1 SV=1	cell death;metabolic process;regulation of biological process;response to stimulus;transport	cytoplasm;cytosol;nucleus	DNA binding;protein binding;RNA binding	Thoc1	Spliceosome; RNA transport		4.1907e+06	0	0	0	0	3.35175e+06	3.11387e+06	4.3405e+06	3.35508e+06	5.90101e+06
P70388	DNA repair protein RAD50 OS=Mus musculus OX=10090 GN=Rad50 PE=1 SV=1	cell organization and biogenesis;metabolic process;regulation of biological process;response to stimulus	chromosome;membrane;nucleus	catalytic activity;DNA binding;metal ion binding;motor activity;nucleotide binding;protein binding	Rad50			0	665888	1.18826e+06	0	0	0	1.81438e+06	1.87637e+06	2.42963e+06	2.13934e+06
Q9D883	Splicing factor U2AF 35 kDa subunit OS=Mus musculus OX=10090 GN=U2af1 PE=1 SV=4	metabolic process	nucleus;spliceosomal complex	metal ion binding;protein binding;RNA binding	U2af1	Spliceosome	mRNA processing	1.39118e+06	0	0	2.09652e+06	0	9.77887e+06	1.37491e+06	968032	3.2671e+06	0
Q9DCT2	NADH dehydrogenase [ubiquinone] iron-sulfur protein 3, mitochondrial OS=Mus musculus OX=10090 GN=Ndufs3 PE=1 SV=2	metabolic process;regulation of biological process;transport	membrane;mitochondrion	catalytic activity	Ndufs3	Metabolic pathways; Huntington's disease; Non-alcoholic fatty liver disease (NAFLD); Oxidative phosphorylation; Parkinson's disease; Alzheimer's disease	Oxidative phosphorylation; Electron Transport Chain	590990	573104	399911	383461	903667	517448	792914	2.90686e+06	3.5334e+06	4.76497e+06
P14685	26S proteasome non-ATPase regulatory subunit 3 OS=Mus musculus OX=10090 GN=Psmd3 PE=1 SV=3	metabolic process;regulation of biological process	membrane;nucleus;proteasome	enzyme regulator activity;protein binding	Psmd3	Proteasome; Epstein-Barr virus infection	TNF-alpha NF-kB Signaling Pathway; Proteasome Degradation	0	0	0	0	801697	0	1.71257e+06	0	1.79346e+06	0
Q9JII6	Aldo-keto reductase family 1 member A1 OS=Mus musculus OX=10090 GN=Akr1a1 PE=1 SV=3	metabolic process	cytosol;membrane	catalytic activity	Akr1a1	Metabolic pathways; Glycolysis / Gluconeogenesis; Glycerolipid metabolism; Pentose and glucuronate interconversions	Metapathway biotransformation	0	0	0	2.06307e+06	0	0	2.11564e+06	1.67788e+06	2.26613e+06	2.84046e+06
Q5XJY5	Coatomer subunit delta OS=Mus musculus OX=10090 GN=Arcn1 PE=1 SV=2	response to stimulus;transport	cytoplasm;endoplasmic reticulum;Golgi;membrane	RNA binding	Arcn1			0	0	0	0	1.63288e+06	1.69123e+06	1.9808e+06	1.66123e+06	0	1.61601e+06
Q62376	U1 small nuclear ribonucleoprotein 70 kDa OS=Mus musculus OX=10090 GN=Snrnp70 PE=1 SV=2	metabolic process;regulation of biological process;response to stimulus	cytoplasm;nucleus;spliceosomal complex	RNA binding	Snrnp70	Spliceosome	mRNA processing	0	0	0	0	193028	257140	178813	154738	0	226717
Q8C4J7	Transducin beta-like protein 3 OS=Mus musculus OX=10090 GN=Tbl3 PE=2 SV=1	metabolic process	nucleus	protein binding;RNA binding	Tbl3	Ribosome biogenesis in eukaryotes		0	452684	0	506450	0	991165	1.01512e+06	748459	604266	646122
P16110	Galectin-3 OS=Mus musculus OX=10090 GN=Lgals3 PE=1 SV=3	cell differentiation;cell organization and biogenesis;cellular component movement;defense response;metabolic process;regulation of biological process;response to stimulus	cell surface;cytoplasm;extracellular;membrane;nucleus;spliceosomal complex	protein binding;receptor activity;RNA binding;signal transducer activity	Lgals3			0	0	1.61109e+06	0	1.37386e+06	2.43407e+06	1.48501e+06	2.05159e+06	2.86191e+06	3.54316e+06
Q9CZR8	Elongation factor Ts, mitochondrial OS=Mus musculus OX=10090 GN=Tsfm PE=1 SV=1	metabolic process;regulation of biological process	mitochondrion;nucleus;organelle lumen	protein binding;RNA binding	Tsfm			1.06227e+06	0	1.18644e+06	0	0	1.2863e+06	2.75098e+06	1.39244e+06	1.0114e+06	2.71755e+06
Q9QXX4	Calcium-binding mitochondrial carrier protein Aralar2 OS=Mus musculus OX=10090 GN=Slc25a13 PE=1 SV=1	metabolic process;response to stimulus;transport	membrane;mitochondrion	metal ion binding;transporter activity	Slc25a13			0	0	1.3522e+06	0	1.90771e+06	2.20852e+06	3.17231e+06	3.16024e+06	3.26851e+06	1.39036e+06
Q9JJT0	RNA 3'-terminal phosphate cyclase-like protein OS=Mus musculus OX=10090 GN=Rcl1 PE=2 SV=1	metabolic process	nucleus	catalytic activity	Rcl1	Ribosome biogenesis in eukaryotes		6.84252e+06	5.19806e+06	3.7563e+06	3.31081e+06	1.50553e+06	4.29256e+07	1.75097e+07	1.25143e+07	4.21422e+06	4.35255e+06
Q99N69	Leupaxin OS=Mus musculus OX=10090 GN=Lpxn PE=1 SV=2	metabolic process;regulation of biological process	cytoplasm;cytosol;membrane;nucleus	metal ion binding;protein binding	Lpxn			0	214668	190653	0	0	298616	398466	0	406357	466992
Q8CFE2	Histone PARylation factor 1 OS=Mus musculus OX=10090 GN=Hpf1 PE=1 SV=1	metabolic process;regulation of biological process;response to stimulus	nucleus	protein binding	2700029M09Rik; Hpf1			1.586e+06	1.53513e+06	1.825e+06	0	1.55584e+06	1.36835e+06	7.76757e+06	4.73935e+06	7.26792e+06	2.39285e+06
P46977	Dolichyl-diphosphooligosaccharide--protein glycosyltransferase subunit STT3A OS=Homo sapiens OX=9606 GN=STT3A PE=1 SV=2	metabolic process	endoplasmic reticulum;membrane	catalytic activity;metal ion binding;protein binding	STT3A	N-Glycan biosynthesis; Protein processing in endoplasmic reticulum; Metabolic pathways		388344	259154	0	0	0	465024	598890	380039	395266	479535
Q5SUF2	Luc7-like protein 3 OS=Mus musculus OX=10090 GN=Luc7l3 PE=1 SV=1	cell organization and biogenesis;metabolic process	nucleus;spliceosomal complex	DNA binding;RNA binding	Luc7l3			0	2.37715e+06	1.66997e+06	0	1.04399e+06	4.13141e+06	3.82093e+06	2.62901e+06	3.94729e+06	3.10276e+06
P46087	Probable 28S rRNA (cytosine(4447)-C(5))-methyltransferase OS=Homo sapiens OX=9606 GN=NOP2 PE=1 SV=2	cell organization and biogenesis;metabolic process;regulation of biological process	nucleus	catalytic activity;protein binding;RNA binding	NOP2		Imatinib and Chronic Myeloid Leukemia	0	148881	0	0	252667	182824	381501	358297	451424	0
Q8R5A3	Amyloid beta A4 precursor protein-binding family B member 1-interacting protein OS=Mus musculus OX=10090 GN=Apbb1ip PE=1 SV=2	regulation of biological process;response to stimulus	cytoplasm;cytoskeleton;cytosol;membrane	protein binding	Apbb1ip	Platelet activation; Rap1 signaling pathway	TYROBP Causal Network	517957	696632	588241	0	0	425307	3.80064e+06	580997	732482	619200
Q8BHB4	WD repeat-containing protein 3 OS=Mus musculus OX=10090 GN=Wdr3 PE=1 SV=1	metabolic process	membrane;nucleus	protein binding;RNA binding	Wdr3	Ribosome biogenesis in eukaryotes		1.29822e+06	0	0	0	1.09202e+06	1.85253e+06	1.11753e+06	2.34415e+06	1.44224e+06	1.36174e+06
P11440	Cyclin-dependent kinase 1 OS=Mus musculus OX=10090 GN=Cdk1 PE=1 SV=3	cell death;cell differentiation;cell division;cell organization and biogenesis;cell proliferation;metabolic process;regulation of biological process;response to stimulus	cytoplasm;cytoskeleton;cytosol;membrane;mitochondrion;nucleus;organelle lumen	catalytic activity;nucleotide binding;protein binding	Cdk1	Herpes simplex infection; p53 signaling pathway; Progesterone-mediated oocyte maturation; Epstein-Barr virus infection; Oocyte meiosis; Cell cycle; Gap junction; Viral carcinogenesis	Hedgehog Signaling Pathway; miRNA regulation of DNA Damage Response; Spinal Cord Injury; G1 to S cell cycle control; Wnt Signaling Pathway NetPath	87380.8	0	43761.3	0	55552.1	133506	148351	0	181669	160903
Q99JX7	Nuclear RNA export factor 1 OS=Mus musculus OX=10090 GN=Nxf1 PE=1 SV=3	transport	cytoplasm;nucleus	protein binding;RNA binding;transporter activity	Nxf1		mRNA processing	0	1.62114e+06	0	0	0	0	1.28249e+06	1.22243e+06	2.61742e+06	0
P33609	DNA polymerase alpha catalytic subunit OS=Mus musculus OX=10090 GN=Pola1 PE=1 SV=2	cell proliferation;metabolic process;response to stimulus	chromosome;cytoplasm;cytosol;nucleus	catalytic activity;DNA binding;metal ion binding;nucleotide binding;protein binding	Pola1	DNA replication; Metabolic pathways; Purine metabolism; Pyrimidine metabolism	DNA Replication; Purine metabolism; Nucleotide Metabolism	0	798991	0	0	1484235	0	2.31796e+06	1.47679e+06	1.97916e+06	1.35547e+06
P70698	CTP synthase 1 OS=Mus musculus OX=10090 GN=Ctps1 PE=1 SV=2	cell proliferation;metabolic process	membrane	catalytic activity;nucleotide binding;protein binding	Ctps	Metabolic pathways; Pyrimidine metabolism		0	0	0	0	111020	66588.1	100122	81929.4	0	97839.9
Q8R5C5	Beta-centractin OS=Mus musculus OX=10090 GN=Actr1b PE=1 SV=1		cytoplasm;cytoskeleton;membrane	nucleotide binding	Actr1b			2.95082e+06	978391	685699	0	0	3.08731e+06	3.2163e+06	2.53788e+06	2.28357e+06	3.26614e+06
Q8K3H0	DCC-interacting protein 13-alpha OS=Mus musculus OX=10090 GN=Appl1 PE=1 SV=1	cell proliferation;regulation of biological process;response to stimulus	cytosol;endosome;membrane;nucleus	protein binding	Appl1	Longevity regulating pathway; Pathways in cancer; Colorectal cancer	EGFR1 Signaling Pathway	2.56315e+06	1.15604e+06	0	0	1.18965e+06	2.43883e+06	1.60035e+06	1.81749e+06	6.13077e+06	3.22321e+06
Q6Y7W8	GRB10-interacting GYF protein 2 OS=Mus musculus OX=10090 GN=Gigyf2 PE=1 SV=2	cell differentiation;metabolic process;regulation of biological process;response to stimulus	cytoplasm;cytosol;endoplasmic reticulum;endosome;Golgi;membrane	protein binding;RNA binding	Gigyf2			1.33132e+06	0	0	0	0	1.23933e+06	0	1.2408e+06	0	1.62145e+06
O35609	Secretory carrier-associated membrane protein 3 OS=Mus musculus OX=10090 GN=Scamp3 PE=1 SV=3	response to stimulus;transport	membrane	protein binding	Scamp3			0	0	0	1.15552e+06	1.42596e+06	1.77712e+06	2.19192e+06	1.6457e+06	2.33358e+06	0
Q99L47	Hsc70-interacting protein OS=Mus musculus OX=10090 GN=St13 PE=1 SV=1	cell organization and biogenesis;metabolic process;regulation of biological process	cytoplasm;cytosol	nucleotide binding;protein binding	St13			0	0	0	849825	0	778006	1.08323e+06	727441	0	0
Q8K1J6	CCA tRNA nucleotidyltransferase 1, mitochondrial OS=Mus musculus OX=10090 GN=Trnt1 PE=1 SV=1	cell organization and biogenesis;metabolic process	mitochondrion	catalytic activity;nucleotide binding;RNA binding	Trnt1	RNA transport		1.76465e+06	435277	203240	0	0	1.61911e+06	0	1.54167e+06	1.98744e+06	2.12619e+06
Q2QL92	Testin OS=Microcebus murinus OX=30608 GN=TES PE=3 SV=1	regulation of biological process	cytoplasm	metal ion binding	TES			7.67745e+06	6.56814e+06	5.73653e+06	5.26371e+06	4.4416e+06	5.59134e+06	4.9249e+06	6.46566e+07	5.23127e+06	6.93463e+06
Q7TQK5	Coiled-coil domain-containing protein 93 OS=Mus musculus OX=10090 GN=Ccdc93 PE=1 SV=1	transport	endosome		Ccdc93			3.42408e+06	0	0	0	0	3.02922e+06	2.75489e+06	0	2.03937e+06	2.13174e+06
Q91WS0	CDGSH iron-sulfur domain-containing protein 1 OS=Mus musculus OX=10090 GN=Cisd1 PE=1 SV=1	regulation of biological process	membrane;mitochondrion	metal ion binding;protein binding	Cisd1		Adipogenesis genes	4.4397e+06	874192	1.65703e+06	875254	4.11389e+06	3.42251e+06	7.86412e+06	7.42208e+06	9.95765e+06	5.7673e+06
Q8VBZ3	Cleft lip and palate transmembrane protein 1 homolog OS=Mus musculus OX=10090 GN=Clptm1 PE=1 SV=1	cell differentiation;development;regulation of biological process	membrane		Clptm1			0	1.25555e+06	0	1.7776e+06	0	2.49165e+06	2.766e+06	0	0	3.42038e+06
Q60737	Casein kinase II subunit alpha OS=Mus musculus OX=10090 GN=Csnk2a1 PE=1 SV=2	cell death;metabolic process;regulation of biological process;response to stimulus	chromosome;cytoplasm;membrane;nucleus	catalytic activity;enzyme regulator activity;nucleotide binding;protein binding	Csnk2a1	Herpes simplex infection; Wnt signaling pathway; Epstein-Barr virus infection; Adherens junction; Ribosome biogenesis in eukaryotes; NF-kappa B signaling pathway; Tight junction; Measles	TNF-alpha NF-kB Signaling Pathway; Wnt Signaling Pathway NetPath	801530	502867	0	0	0	704397	802580	600278	291042	1.14427e+06
O09106	Histone deacetylase 1 OS=Mus musculus OX=10090 GN=Hdac1 PE=1 SV=1	cell differentiation;cell organization and biogenesis;metabolic process;regulation of biological process;response to stimulus	chromosome;cytoplasm;cytosol;nucleus	catalytic activity;DNA binding;metal ion binding;protein binding	Hdac1	Epstein-Barr virus infection; Amphetamine addiction; Huntington's disease; Transcriptional misregulation in cancer; Notch signaling pathway; Thyroid hormone signaling pathway; Cell cycle; Pathways in cancer; Alcoholism; Viral carcinogenesis; Chronic myeloid leukemia; Longevity regulating pathway - multiple species	Estrogen signaling; PluriNetWork; TNF-alpha NF-kB Signaling Pathway; Delta-Notch Signaling Pathway; Notch Signaling Pathway; Histone modifications; IL-6 signaling Pathway; EGFR1 Signaling Pathway	0	0	2.32809e+06	0	0	0	0	2.86512e+06	1.83061e+06	1.61323e+06
O88351	Inhibitor of nuclear factor kappa-B kinase subunit beta OS=Mus musculus OX=10090 GN=Ikbkb PE=1 SV=1	cell organization and biogenesis;defense response;metabolic process;regulation of biological process;response to stimulus	cytoplasm;cytosol;membrane;nucleus	catalytic activity;nucleotide binding;protein binding;signal transducer activity	Ikbkb	FoxO signaling pathway; Acute myeloid leukemia; mTOR signaling pathway; Herpes simplex infection; Chagas disease (American trypanosomiasis); T cell receptor signaling pathway; MAPK signaling pathway; Type II diabetes mellitus; MicroRNAs in cancer; Ras signaling pathway; TNF signaling pathway; NOD-like receptor signaling pathway; Insulin signaling pathway; Toxoplasmosis; Epstein-Barr virus infecti…	Apoptosis; NLR Proteins; MicroRNAs in Cardiomyocyte Hypertrophy; Chemokine signaling pathway; TNF-alpha NF-kB Signaling Pathway; Focal Adhesion-PI3K-Akt-mTOR-signaling pathway; MAPK signaling pathway; Insulin Signaling; Toll Like Receptor signaling	1.03583e+07	1.08858e+06	1.55984e+06	2.04255e+06	2596782	9.36432e+06	6.8883e+06	1.0874e+07	1.11078e+07	9.37193e+06
Q8BWT1	3-ketoacyl-CoA thiolase, mitochondrial OS=Mus musculus OX=10090 GN=Acaa2 PE=1 SV=3	cell organization and biogenesis;metabolic process;regulation of biological process;response to stimulus	membrane;mitochondrion;organelle lumen	catalytic activity;RNA binding	Acaa2	Fatty acid metabolism; Valine, leucine and isoleucine degradation; Metabolic pathways; Fatty acid degradation; Fatty acid elongation	Fatty Acid Biosynthesis	3.21804e+06	2.29301e+06	2.65835e+06	0	2.7569e+06	9.12682e+06	3.34649e+06	8.26667e+06	3.71882e+06	4.96694e+06
Q9D0F3	Protein ERGIC-53 OS=Mus musculus OX=10090 GN=Lman1 PE=1 SV=1	cell organization and biogenesis;regulation of biological process;transport	endoplasmic reticulum;Golgi;membrane	metal ion binding;protein binding	Lman1	Protein processing in endoplasmic reticulum		0	0	673443	578256	0	726262	919105	0	550604	1.09121e+06
Q9CXF4	TBC1 domain family member 15 OS=Mus musculus OX=10090 GN=Tbc1d15 PE=1 SV=1	regulation of biological process;transport	cytoplasm;extracellular;mitochondrion	enzyme regulator activity;protein binding	Tbc1d15			1.84358e+06	2.71063e+06	1.9814e+06	0	0	4.62033e+06	2.18547e+06	2.47195e+06	3.17001e+06	4.68914e+06
Q3TLH4	Protein PRRC2C OS=Mus musculus OX=10090 GN=Prrc2c PE=1 SV=3	cell differentiation	membrane	protein binding;RNA binding	Prrc2c			0	0	0	0	1.82616e+06	0	2.40046e+06	0	1.24345e+06	1.13504e+06
Q9JIG7	Coiled-coil domain-containing protein 22 OS=Mus musculus OX=10090 GN=Ccdc22 PE=1 SV=1	cellular homeostasis;regulation of biological process;transport	endosome	protein binding	Ccdc22			0	1.0738e+06	1.48759e+06	1.52039e+06	3145552	3.02686e+06	1.96177e+06	0	5.11615e+06	8.37513e+06
P19253	60S ribosomal protein L13a OS=Mus musculus OX=10090 GN=Rpl13a PE=1 SV=4	cellular component movement;metabolic process;regulation of biological process;response to stimulus	cytoplasm;membrane;nucleus;ribosome	RNA binding;structural molecule activity	Rpl13a	Ribosome	Cytoplasmic Ribosomal Proteins	212692	0	131737	0	231284	175070	226295	297644	272493	493690
P56960	Exosome component 10 OS=Mus musculus OX=10090 GN=Exosc10 PE=1 SV=2	metabolic process;regulation of biological process	cytoplasm;cytosol;membrane;nucleus	catalytic activity;nucleotide binding;RNA binding	Exosc10	RNA degradation		1.70615e+06	958634	3.4102e+06	2.09823e+06	4.22166e+06	6.20515e+06	6.87815e+06	7.15061e+06	5.52129e+06	5.72958e+06
Q6Q477	Plasma membrane calcium-transporting ATPase 4 OS=Mus musculus OX=10090 GN=Atp2b4 PE=1 SV=1	cellular component movement;cellular homeostasis;regulation of biological process;response to stimulus;transport	membrane	catalytic activity;enzyme regulator activity;metal ion binding;nucleotide binding;protein binding;transporter activity	Atp2b4	Pancreatic secretion; cGMP-PKG signaling pathway; Calcium signaling pathway; Salivary secretion; cAMP signaling pathway; Adrenergic signaling in cardiomyocytes	Calcium Regulation in the Cardiac Cell	0	1.31541e+06	1.21958e+06	1.02334e+06	1.94679e+06	2.44124e+06	2.10808e+06	1.22216e+06	3.94254e+06	3.94007e+06
Q91VE6	MKI67 FHA domain-interacting nucleolar phosphoprotein OS=Mus musculus OX=10090 GN=Nifk PE=1 SV=1	regulation of biological process	chromosome;cytoplasm;nucleus	RNA binding	Mki67ip; Nifk		mRNA processing	0	0	1.13494e+06	2.3735e+06	0	1.23577e+06	1.57728e+06	1.5849e+06	1.91673e+06	2.26082e+06
Q8R2E9	ERO1-like protein beta OS=Mus musculus OX=10090 GN=Ero1b PE=1 SV=1	cell organization and biogenesis;cellular homeostasis;metabolic process;regulation of biological process;transport	endoplasmic reticulum;membrane	catalytic activity	Ero1lb	Protein processing in endoplasmic reticulum		2.91223e+06	2.79175e+06	5.82896e+06	0	5.17312e+06	1.08979e+07	6.75113e+06	7.85835e+06	2.97665e+06	1.14167e+07
Q8BV66	Interferon-induced protein 44 OS=Mus musculus OX=10090 GN=Ifi44 PE=2 SV=1		cytoplasm		Ifi44			3.62468e+06	553864	133791	0	3.73944e+06	2.08533e+06	5.16968e+06	2.88063e+06	5.28311e+06	3.80171e+06
Q99LI7	Cleavage stimulation factor subunit 3 OS=Mus musculus OX=10090 GN=Cstf3 PE=1 SV=1	metabolic process	nucleus	protein binding;RNA binding	Cstf3	mRNA surveillance pathway	mRNA processing	2.39955e+06	0	6.50765e+06	4.50905e+06	0	6.94229e+06	9.47689e+06	7.43598e+06	7.39567e+06	767329
Q8C052	Microtubule-associated protein 1S OS=Mus musculus OX=10090 GN=Map1s PE=1 SV=2	cell death;cell organization and biogenesis;regulation of biological process	cytoplasm;cytoskeleton;cytosol;nucleus	DNA binding;protein binding	Map1s; Mtap1s			2.19844e+06	0	0	0	0	0	718284	0	1.7919e+06	2.73135e+06
Q9ES00	Ubiquitin conjugation factor E4 B OS=Mus musculus OX=10090 GN=Ube4b PE=1 SV=3	cell organization and biogenesis;metabolic process;regulation of biological process;response to stimulus	cytoplasm;nucleus	catalytic activity;nucleotide binding;protein binding	Ube4b	Ubiquitin mediated proteolysis; Protein processing in endoplasmic reticulum		2.00138e+06	0	0	0	2.29741e+06	1.62705e+06	5.58324e+06	783833	0	2.07185e+06
Q99JY0	Trifunctional enzyme subunit beta, mitochondrial OS=Mus musculus OX=10090 GN=Hadhb PE=1 SV=1	metabolic process	endoplasmic reticulum;membrane;mitochondrion	catalytic activity;nucleotide binding;protein binding;RNA binding	Hadhb	Fatty acid metabolism; Valine, leucine and isoleucine degradation; Metabolic pathways; Fatty acid degradation; Fatty acid elongation	Fatty Acid Beta Oxidation	0	0	0	427939	733560	188694	736799	527306	508468	739552
P46100	Transcriptional regulator ATRX OS=Homo sapiens OX=9606 GN=ATRX PE=1 SV=5	cell organization and biogenesis;metabolic process;regulation of biological process;response to stimulus	chromosome;nucleus	catalytic activity;DNA binding;metal ion binding;nucleotide binding;protein binding	ATRX		Pathways Affected in Adenoid Cystic Carcinoma	3.16517e+06	4.75554e+06	0	3.39248e+06	0	7.5346e+06	5.70921e+06	5.86785e+06	3.61896e+06	3.39298e+06
Q9QYG0	Protein NDRG2 OS=Mus musculus OX=10090 GN=Ndrg2 PE=1 SV=1	cell differentiation;development;regulation of biological process;response to stimulus	cytoplasm;Golgi;nucleus		Ndrg2			0	1.7295e+06	809848	0	2.67511e+06	2.47711e+06	2.04035e+06	2.8521e+06	1.94074e+06	2.59752e+06
P46467	Vacuolar protein sorting-associated protein 4B OS=Mus musculus OX=10090 GN=Vps4b PE=1 SV=2	cell division;cell organization and biogenesis;metabolic process;regulation of biological process;response to stimulus;transport	cytoplasm;cytosol;endosome;membrane;nucleus	catalytic activity;nucleotide binding;protein binding;RNA binding	Vps4b	Endocytosis		0	263159	197519	2.91049e+06	393709	2.10551e+06	1.99212e+06	1.53527e+06	1.61036e+06	1.28041e+06
P11928	2'-5'-oligoadenylate synthase 1A OS=Mus musculus OX=10090 GN=Oas1a PE=1 SV=2	defense response;metabolic process;regulation of biological process;response to stimulus	cytoplasm;cytosol;endoplasmic reticulum;mitochondrion;nucleus	catalytic activity;metal ion binding;nucleotide binding;protein binding;RNA binding	Oas1a	Herpes simplex infection; NOD-like receptor signaling pathway; Influenza A; Hepatitis C; Measles	mRNA processing	442454	0	0	0	491589	0	499626	416530	613859	582689
Q922U1	U4/U6 small nuclear ribonucleoprotein Prp3 OS=Mus musculus OX=10090 GN=Prpf3 PE=1 SV=1	cell organization and biogenesis;metabolic process	cytosol;nucleus;spliceosomal complex	protein binding;RNA binding	Prpf3	Spliceosome	mRNA processing	0	498840	0	508953	0	566905	360699	338035	476134	524656
P70336	Rho-associated protein kinase 2 OS=Mus musculus OX=10090 GN=Rock2 PE=1 SV=1	cell organization and biogenesis;metabolic process;regulation of biological process;response to stimulus	cytoplasm;cytoskeleton;cytosol;membrane;nucleus	catalytic activity;metal ion binding;motor activity;nucleotide binding;protein binding;RNA binding;structural molecule activity	Rock2	Oxytocin signaling pathway; Leukocyte transendothelial migration; Wnt signaling pathway; Regulation of actin cytoskeleton; Focal adhesion; Chemokine signaling pathway; Platelet activation; Axon guidance; Sphingolipid signaling pathway; Proteoglycans in cancer; Salmonella infection; cGMP-PKG signaling pathway; Pathways in cancer; cAMP signaling pathway; Vascular smooth muscle contraction	MicroRNAs in Cardiomyocyte Hypertrophy; PluriNetWork; Chemokine signaling pathway; G13 Signaling Pathway; Regulation of Actin Cytoskeleton; Integrin-mediated Cell Adhesion; Focal Adhesion	0	2.4928e+06	3.0133e+06	2.97706e+06	5.21376e+06	1.022e+07	5.30285e+06	4.44711e+06	6.34664e+06	4.41855e+06
Q61792	LIM and SH3 domain protein 1 OS=Mus musculus OX=10090 GN=Lasp1 PE=1 SV=1	transport	cytoplasm;cytoskeleton	metal ion binding;protein binding;transporter activity	Lasp1			9.84178e+06	1.14047e+07	1.97928e+07	7.31834e+06	1.69886e+07	2.21843e+07	2.6143e+07	2.80706e+07	4.00325e+07	2.98117e+07
P23492	Purine nucleoside phosphorylase OS=Mus musculus OX=10090 GN=Pnp PE=1 SV=2	cell organization and biogenesis;metabolic process;regulation of biological process;response to stimulus	cytoplasm;cytoskeleton;cytosol;extracellular;nucleus	catalytic activity	Pnp	Metabolic pathways; Nicotinate and nicotinamide metabolism; Purine metabolism; Pyrimidine metabolism	Purine metabolism	1.00002e+06	0	1.62124e+06	0	1.75242e+06	0	3.2234e+06	1.94546e+06	2.50661e+06	2.02041e+06
Q9JHR7	Insulin-degrading enzyme OS=Mus musculus OX=10090 GN=Ide PE=1 SV=1	cell organization and biogenesis;cellular homeostasis;metabolic process;regulation of biological process	cell surface;cytoplasm;cytosol;extracellular;membrane;mitochondrion;nucleus;organelle lumen;proteasome	catalytic activity;metal ion binding;nucleotide binding;protein binding	Ide			0	0	4.58559e+06	0	0	0	0	0	4.62795e+06	5.5006e+06
Q9D0L8	mRNA cap guanine-N7 methyltransferase OS=Mus musculus OX=10090 GN=Rnmt PE=1 SV=1	metabolic process	nucleus	catalytic activity;RNA binding	Rnmt	mRNA surveillance pathway	mRNA processing	0	971380	2.12089e+06	743831	1.38416e+06	2.89539e+06	3.13653e+06	1.22547e+06	2.72044e+06	1.41038e+06
Q9CZ30	Obg-like ATPase 1 OS=Mus musculus OX=10090 GN=Ola1 PE=1 SV=1	metabolic process	cytoplasm;cytosol;membrane;nucleus	catalytic activity;metal ion binding;nucleotide binding;protein binding	Ola1			0	0	6.41267e+06	2.08645e+06	7.42547e+06	790126	5.39963e+06	1.14365e+07	9.77894e+06	6.95142e+06
Q924K8	Metastasis-associated protein MTA3 OS=Mus musculus OX=10090 GN=Mta3 PE=1 SV=1	regulation of biological process	cytoplasm;nucleus	DNA binding;metal ion binding;protein binding	Mta3			2.44278e+06	0	0	0	0	1.92232e+06	2.14468e+06	0	0	1.18984e+06
Q3UMC0	ATPase family protein 2 homolog OS=Mus musculus OX=10090 GN=Spata5 PE=1 SV=2	cell differentiation;development;metabolic process;response to stimulus	cytoplasm;mitochondrion	catalytic activity;nucleotide binding;RNA binding	Spata5	Ribosome biogenesis in eukaryotes		2.79472e+06	4.15818e+06	3.31074e+06	0	0	0	3.97554e+06	3.37453e+06	1.04087e+07	4.25235e+06
Q8BJY1	26S proteasome non-ATPase regulatory subunit 5 OS=Mus musculus OX=10090 GN=Psmd5 PE=1 SV=4	cell organization and biogenesis			Psmd5		Proteasome Degradation	0	265494	137834	214703	407970	330583	495018	421588	544183	405029
Q9QUI0	Transforming protein RhoA OS=Mus musculus OX=10090 GN=Rhoa PE=1 SV=1	cell differentiation;cell division;cell organization and biogenesis;cellular component movement;metabolic process;regulation of biological process;response to stimulus	cytoplasm;cytoskeleton;cytosol;endosome;membrane;mitochondrion;nucleus	catalytic activity;nucleotide binding;protein binding	Rhoa	Oxytocin signaling pathway; Leukocyte transendothelial migration; Endocytosis; mTOR signaling pathway; Wnt signaling pathway; T cell receptor signaling pathway; Phospholipase D signaling pathway; Regulation of actin cytoskeleton; Pancreatic secretion; MicroRNAs in cancer; Ras signaling pathway; Focal adhesion; NOD-like receptor signaling pathway; Chemokine signaling pathway; Platelet activation; …	MicroRNAs in Cardiomyocyte Hypertrophy; Chemokine signaling pathway; G Protein Signaling Pathways; Spinal Cord Injury; G13 Signaling Pathway; Wnt Signaling in Kidney Disease; Wnt Signaling Pathway; Alpha6-Beta4 Integrin Signaling Pathway; Regulation of Actin Cytoskeleton; Wnt Signaling Pathway NetPath; Wnt Signaling Pathway and Pluripotency; Focal Adhesion	0	693208	502564	471038	863662	878492	1.75681e+06	782309	812779	1.18434e+06
Q99M31	Heat shock 70 kDa protein 14 OS=Mus musculus OX=10090 GN=Hspa14 PE=1 SV=2		cytoplasm;cytosol;membrane;ribosome	nucleotide binding	Hspa14			0	1.5047e+06	0	1.60221e+06	1.87852e+06	990717	2.51027e+06	3.43852e+06	1.70977e+06	2.01423e+06
P09528	Ferritin heavy chain OS=Mus musculus OX=10090 GN=Fth1 PE=1 SV=2	cellular homeostasis;metabolic process;regulation of biological process;response to stimulus;transport	extracellular;mitochondrion;nucleus;organelle lumen;vacuole	catalytic activity;metal ion binding	Fth1	Mineral absorption	Iron Homeostasis	8.57368e+06	6.98181e+06	7.86109e+06	4.62703e+06	6595491	9.73315e+06	8.02484e+06	1.2973e+07	1.36789e+07	2.93794e+07
Q91WM3	U3 small nucleolar RNA-interacting protein 2 OS=Mus musculus OX=10090 GN=Rrp9 PE=1 SV=1	metabolic process	nucleus	protein binding;RNA binding	Rrp9			3.96252e+06	753789	858758	926565	2819701	2.90558e+06	2.90783e+06	3.13488e+06	4.31086e+06	6.51031e+06
Q99LI2	Chloride channel CLIC-like protein 1 OS=Mus musculus OX=10090 GN=Clcc1 PE=1 SV=1	transport	cytoplasm;endoplasmic reticulum;Golgi;membrane;nucleus	transporter activity	Clcc1			3.50167e+06	0	1.09861e+06	0	0	0	0	1.59249e+06	4.61669e+06	3.51058e+06
Q91W90	Thioredoxin domain-containing protein 5 OS=Mus musculus OX=10090 GN=Txndc5 PE=1 SV=2	cellular homeostasis;metabolic process;regulation of biological process;response to stimulus;transport	endoplasmic reticulum;organelle lumen	catalytic activity	Txndc5	Protein processing in endoplasmic reticulum		0	238743	167239	222982	383084	302876	459945	459609	362677	516061
Q3UMY5	Echinoderm microtubule-associated protein-like 4 OS=Mus musculus OX=10090 GN=Eml4 PE=1 SV=1	regulation of biological process	cytoplasm;cytoskeleton;membrane	protein binding	Eml4	Non-small cell lung cancer		1.37091e+06	2.25904e+06	1.05999e+06	956216	1.81955e+06	870872	3.72333e+06	3.29443e+06	3.44893e+06	4.13463e+06
B1AZI6	THO complex subunit 2 OS=Mus musculus OX=10090 GN=Thoc2 PE=1 SV=1	cell differentiation;cell division;cell organization and biogenesis;metabolic process;regulation of biological process;transport	nucleus	protein binding;RNA binding	Thoc2	Spliceosome; RNA transport		3.29471e+06	2.18761e+06	2.13039e+06	0	3.08152e+06	5.37549e+06	4.96712e+06	3.9249e+06	2.10415e+06	5.76324e+06
Q91YH5	Atlastin-3 OS=Mus musculus OX=10090 GN=Atl3 PE=1 SV=1	cell organization and biogenesis;regulation of biological process	endoplasmic reticulum;membrane	catalytic activity;nucleotide binding;protein binding	Atl3			2.52286e+06	0	2.58938e+06	0	0	1.77705e+06	2.50361e+06	1.75354e+06	1.63857e+06	2.90785e+06
Q9CXW4	60S ribosomal protein L11 OS=Mus musculus OX=10090 GN=Rpl11 PE=1 SV=4	cell organization and biogenesis;metabolic process;regulation of biological process;transport	cytoplasm;membrane;nucleus;ribosome	protein binding;RNA binding;structural molecule activity	Rpl11	Ribosome	Cytoplasmic Ribosomal Proteins; mRNA processing	3.0818e+06	2.42929e+06	2.97687e+06	0	6.37857e+06	7.14539e+06	8.09273e+06	3.59128e+06	6.23625e+06	5.6536e+06
P70460	Vasodilator-stimulated phosphoprotein OS=Mus musculus OX=10090 GN=Vasp PE=1 SV=4	cell organization and biogenesis;cellular component movement;regulation of biological process	cytoplasm;cytoskeleton;cytosol;membrane	protein binding	Vasp	Leukocyte transendothelial migration; Focal adhesion; Platelet activation; Fc gamma R-mediated phagocytosis; cGMP-PKG signaling pathway; Rap1 signaling pathway	Integrin-mediated Cell Adhesion; Focal Adhesion	339376	544517	966117	363563	2265249	1.84281e+06	2.14385e+06	1.6575e+06	1.94654e+06	1.63866e+06
Q9CQC9	GTP-binding protein SAR1b OS=Mus musculus OX=10090 GN=Sar1b PE=1 SV=1	regulation of biological process;response to stimulus;transport	endoplasmic reticulum;Golgi;membrane	catalytic activity;metal ion binding;nucleotide binding;protein binding;signal transducer activity	Sar1b	Legionellosis; Protein processing in endoplasmic reticulum		3.85099e+06	2.66148e+06	0	1.66655e+06	1.84019e+06	4.79195e+06	3.38574e+06	3.07659e+06	4.90446e+06	4.46776e+06
Q9CRT8	Exportin-T OS=Mus musculus OX=10090 GN=Xpot PE=1 SV=3	transport	cytoplasm;cytosol;nucleus	protein binding;RNA binding	Xpot			980896	3.24793e+06	0	1.51525e+06	0	2.24796e+06	3.44718e+06	2.11151e+06	2.23429e+06	1.77702e+06
O76031	ATP-dependent Clp protease ATP-binding subunit clpX-like, mitochondrial OS=Homo sapiens OX=9606 GN=CLPX PE=1 SV=2	metabolic process;regulation of biological process	cytosol;membrane;mitochondrion;organelle lumen	catalytic activity;enzyme regulator activity;metal ion binding;nucleotide binding;protein binding	CLPX			0	705761	0	0	1.37836e+06	678595	1.666e+06	840290	0	1.07939e+06
P60953	Cell division control protein 42 homolog OS=Homo sapiens OX=9606 GN=CDC42 PE=1 SV=2	cell communication;cell differentiation;cell division;cell organization and biogenesis;cellular component movement;coagulation;metabolic process;regulation of biological process;response to stimulus;transport	cytoplasm;cytoskeleton;cytosol;membrane;vacuole	catalytic activity;nucleotide binding;protein binding	CDC42	Viral carcinogenesis; Endocytosis; T cell receptor signaling pathway; Tight junction; Pathogenic Escherichia coli infection; Pancreatic cancer; Neurotrophin signaling pathway; VEGF signaling pathway; Rap1 signaling pathway; MAPK signaling pathway; Pathways in cancer; AGE-RAGE signaling pathway in diabetic complications; Renal cell carcinoma; Focal adhesion; Proteoglycans in cancer; Salmonella inf…	Androgen receptor signaling pathway; Target Of Rapamycin (TOR) Signaling; Integrin-mediated Cell Adhesion; Integrated Breast Cancer Pathway; RANKL/RANK (Receptor activator of NFKB (ligand)) Signaling Pathway; Leptin signaling pathway; Regulation of Microtubule Cytoskeleton; Metastatic brain tumor; Pathogenic Escherichia coli infection; RalA downstream regulated genes; B Cell Receptor Signaling Pa…	627049	0	0	0	627358	356284	587720	398408	519216	695497
Q9JK91	DNA mismatch repair protein Mlh1 OS=Mus musculus OX=10090 GN=Mlh1 PE=1 SV=2	cell organization and biogenesis;metabolic process;regulation of biological process;response to stimulus	chromosome;membrane;nucleus	catalytic activity;DNA binding;nucleotide binding;protein binding	Mlh1	Platinum drug resistance; Endometrial cancer; Pathways in cancer; Fanconi anemia pathway; Colorectal cancer; Mismatch repair	Mismatch repair; Ovarian Infertility Genes	6.85792e+06	6.01305e+06	5.96699e+06	3.05508e+06	5.98036e+06	1.18157e+07	1.48738e+07	1.39459e+07	5.18885e+06	1.09086e+07
Q8R3C6	Probable RNA-binding protein 19 OS=Mus musculus OX=10090 GN=Rbm19 PE=1 SV=1	development;regulation of biological process	chromosome;cytoplasm;membrane;nucleus	RNA binding	Rbm19		mRNA processing	0	0	278508	224154	266456	265822	312356	372079	300676	305040
P00405	Cytochrome c oxidase subunit 2 OS=Mus musculus OX=10090 GN=Mtco2 PE=1 SV=1	metabolic process;response to stimulus;transport	membrane;mitochondrion	catalytic activity;metal ion binding;transporter activity	COX2	Metabolic pathways; Huntington's disease; Non-alcoholic fatty liver disease (NAFLD); Oxidative phosphorylation; Parkinson's disease; Alzheimer's disease; Cardiac muscle contraction	Selenium Micronutrient Network; Electron Transport Chain	3.79971e+06	4.33759e+06	2.40679e+06	5.07363e+06	2.99892e+06	1.98977e+07	5.15615e+06	4.08488e+06	5.14801e+06	3.32282e+06
P97329	Kinesin-like protein KIF20A OS=Mus musculus OX=10090 GN=Kif20a PE=1 SV=1	cell organization and biogenesis;cellular component movement;transport	cytoplasm;cytoskeleton;Golgi	catalytic activity;motor activity;nucleotide binding;protein binding	Kif20a			1.74017e+06	1.5264e+06	979755	0	1.37917e+06	1.35531e+06	1.05159e+06	1.41956e+06	1.80198e+06	5.73515e+06
Q9DBZ5	Eukaryotic translation initiation factor 3 subunit K OS=Mus musculus OX=10090 GN=Eif3k PE=1 SV=1	metabolic process;regulation of biological process	cytoplasm;cytosol;membrane;nucleus	RNA binding	Eif3k			2.46671e+06	0	4.099e+06	0	3.30125e+06	4.57534e+06	3.85757e+06	4.63935e+06	3.12672e+06	3.63427e+06
Q8BW96	Calcium/calmodulin-dependent protein kinase type 1D OS=Mus musculus OX=10090 GN=Camk1d PE=1 SV=2	defense response;metabolic process;regulation of biological process;response to stimulus	cytoplasm;nucleus	catalytic activity;nucleotide binding;protein binding	Camk1d	Oxytocin signaling pathway; Aldosterone synthesis and secretion		2.83832e+06	2.98955e+06	3.20496e+06	0	2.26669e+06	7.68448e+06	5.63595e+06	1.62057e+06	3.95851e+06	3.65147e+06
Q8BIP0	Aspartate--tRNA ligase, mitochondrial OS=Mus musculus OX=10090 GN=Dars2 PE=1 SV=1	metabolic process	cytoplasm;mitochondrion;nucleus;organelle lumen	catalytic activity;nucleotide binding;protein binding	Dars2	Aminoacyl-tRNA biosynthesis		1.72849e+06	1.8634e+06	6.4548e+06	1.02455e+06	6.43505e+06	2.67244e+06	7.02883e+06	8.44815e+06	1.11207e+07	5.51687e+06
Q8VI75	Importin-4 OS=Mus musculus OX=10090 GN=Ipo4 PE=1 SV=1	cell organization and biogenesis;transport	cytoplasm;membrane;nucleus	protein binding;transporter activity	Ipo4			723437	401892	590854	775220	277786	404517	478290	1.81774e+06	2.08198e+06	687716
Q8BWU5	Probable tRNA N6-adenosine threonylcarbamoyltransferase OS=Mus musculus OX=10090 GN=Osgep PE=1 SV=2	metabolic process	cytoplasm;membrane;nucleus	catalytic activity;metal ion binding	Osgep			4.10616e+06	1.39448e+06	2.29937e+06	2.2929e+06	2422231	4.32432e+06	1.90358e+06	4.05638e+06	9.14329e+06	5.23861e+06
P60867	40S ribosomal protein S20 OS=Mus musculus OX=10090 GN=Rps20 PE=1 SV=1	metabolic process	cytoplasm;membrane;ribosome	RNA binding;structural molecule activity	Rps20	Ribosome	Cytoplasmic Ribosomal Proteins; mRNA processing	194073	154117	0	0	281145	243281	300041	289176	0	404120
O08709	Peroxiredoxin-6 OS=Mus musculus OX=10090 GN=Prdx6 PE=1 SV=3	cell organization and biogenesis;cellular homeostasis;metabolic process;regulation of biological process;response to stimulus	cytoplasm;cytosol;membrane;mitochondrion;nucleus;vacuole	antioxidant activity;catalytic activity;protein binding	Prdx6	Metabolic pathways		0	0	0	183115	0	184011	0	173240	0	0
Q6NZN0	RNA-binding protein 26 OS=Mus musculus OX=10090 GN=Rbm26 PE=1 SV=2	metabolic process;regulation of biological process		metal ion binding;RNA binding	Rbm26		mRNA processing	2.98438e+06	1.73022e+06	1.95419e+06	1.22875e+06	3.55068e+06	3.39287e+06	7.23732e+06	4.15285e+06	4.90629e+06	2.59738e+06
Q3TRM8	Hexokinase-3 OS=Mus musculus OX=10090 GN=Hk3 PE=1 SV=2	cellular homeostasis;metabolic process;regulation of biological process	cytosol;mitochondrion	catalytic activity;nucleotide binding;protein binding	Hk3	Neomycin, kanamycin and gentamicin biosynthesis; Type II diabetes mellitus; Carbohydrate digestion and absorption; Insulin signaling pathway; Metabolic pathways; Amino sugar and nucleotide sugar metabolism; Starch and sucrose metabolism; Glycolysis / Gluconeogenesis; HIF-1 signaling pathway; Carbon metabolism; Fructose and mannose metabolism; Galactose metabolism; Central carbon metabolism in can…	Glycolysis and Gluconeogenesis	1.4232e+06	0	0	0	0	0	0	0	0	2.76711e+06
Q8BH57	WD repeat-containing protein 48 OS=Mus musculus OX=10090 GN=Wdr48 PE=1 SV=1	metabolic process;regulation of biological process;response to stimulus	cytoplasm;endosome;nucleus;vacuole	protein binding	Wdr48	Fanconi anemia pathway		9.52525e+06	1.94483e+06	0	0	8.25727e+06	5.75383e+06	1.0618e+07	7.61467e+06	8.44091e+06	5.43668e+06
Q99LC3	NADH dehydrogenase [ubiquinone] 1 alpha subcomplex subunit 10, mitochondrial OS=Mus musculus OX=10090 GN=Ndufa10 PE=1 SV=1	cell organization and biogenesis;metabolic process;transport	mitochondrion;organelle lumen	catalytic activity	Ndufa10	Metabolic pathways; Huntington's disease; Non-alcoholic fatty liver disease (NAFLD); Oxidative phosphorylation; Parkinson's disease; Alzheimer's disease	Oxidative phosphorylation; Electron Transport Chain	0	223576	0	216768	353378	358125	197740	253035	310070	403134
Q9R1C7	Pre-mRNA-processing factor 40 homolog A OS=Mus musculus OX=10090 GN=Prpf40a PE=1 SV=1	cell organization and biogenesis;cellular component movement;metabolic process;regulation of biological process	cytosol;membrane;nucleus;spliceosomal complex	protein binding;RNA binding	Prpf40a	Spliceosome	mRNA processing	784954	1.20602e+06	0	0	2.70152e+06	2.35695e+06	0	2.01623e+06	2.76105e+06	1.82499e+06
Q9JJA4	Ribosome biogenesis protein WDR12 OS=Mus musculus OX=10090 GN=Wdr12 PE=1 SV=1	cell proliferation;metabolic process;regulation of biological process;response to stimulus	nucleus	protein binding	Wdr12		Delta-Notch Signaling Pathway	0	0	496071	503097	964764	529039	966793	750466	693385	807622
Q9CQR2	40S ribosomal protein S21 OS=Mus musculus OX=10090 GN=Rps21 PE=1 SV=1	metabolic process	ribosome	protein binding;RNA binding;structural molecule activity	Rps21	Ribosome	Cytoplasmic Ribosomal Proteins	1.239e+07	1.29574e+07	1.12054e+07	8.46688e+06	1.6813e+07	2.88435e+07	2.33449e+07	2.13559e+07	1.85165e+07	2.55135e+07
Q9JK81	UPF0160 protein MYG1, mitochondrial OS=Mus musculus OX=10090 GN=Myg1 PE=1 SV=1	response to stimulus	mitochondrion;nucleus		Myg1			951184	6.65619e+06	4.94489e+06	6.34767e+06	7167025	1.26893e+07	7.567e+06	5.32915e+06	1.25848e+07	1.13716e+07
Q8BYC6	Serine/threonine-protein kinase TAO3 OS=Mus musculus OX=10090 GN=Taok3 PE=1 SV=2	metabolic process;regulation of biological process;response to stimulus	cytoplasm	catalytic activity;nucleotide binding;signal transducer activity	Taok3	MAPK signaling pathway		1.0602e+06	0	0	0	3282394	0	3.06258e+06	2.46085e+06	0	2.7103e+06
P70398	Probable ubiquitin carboxyl-terminal hydrolase FAF-X OS=Mus musculus OX=10090 GN=Usp9x PE=1 SV=2	cell division;cell growth;cellular component movement;metabolic process;regulation of biological process;response to stimulus	cytoplasm;membrane	catalytic activity;protein binding	Usp9x			989603	0	0	0	2744280	1.49278e+06	2.7172e+06	893376	1.04808e+06	915976
Q9WUK4	Replication factor C subunit 2 OS=Mus musculus OX=10090 GN=Rfc2 PE=1 SV=1	metabolic process;regulation of biological process;response to stimulus	nucleus	catalytic activity;DNA binding;nucleotide binding;protein binding	Rfc2	DNA replication; Nucleotide excision repair; Mismatch repair	DNA Replication	910144	951395	1.47259e+06	0	2.1424e+06	2.75039e+06	2.07291e+06	2.34435e+06	1.72211e+06	1.42984e+06
Q9CQM9	Glutaredoxin-3 OS=Mus musculus OX=10090 GN=Glrx3 PE=1 SV=1	cell organization and biogenesis;cellular homeostasis;metabolic process;regulation of biological process	cytoplasm;cytosol;nucleus;spliceosomal complex	catalytic activity;metal ion binding;protein binding;RNA binding	Glrx3			0	241008	303763	506730	0	335111	420352	398831	424156	392428
Q8VHE0	Translocation protein SEC63 homolog OS=Mus musculus OX=10090 GN=Sec63 PE=1 SV=4	cell organization and biogenesis;metabolic process;transport	endoplasmic reticulum;membrane	RNA binding;transporter activity	Sec63	Protein export; Protein processing in endoplasmic reticulum		639046	0	0	0	5984453	3.2573e+06	2.35757e+06	1.72584e+06	2.88861e+06	2.15015e+06
P16332	Methylmalonyl-CoA mutase, mitochondrial OS=Mus musculus OX=10090 GN=Mmut PE=1 SV=2	metabolic process	mitochondrion;organelle lumen	catalytic activity;metal ion binding	Mut	Valine, leucine and isoleucine degradation; Metabolic pathways; Propanoate metabolism; Carbon metabolism; Glyoxylate and dicarboxylate metabolism		1.23898e+06	755082	0	0	0	1.34104e+06	0	867531	0	1.49934e+06
A2AGH6	Mediator of RNA polymerase II transcription subunit 12 OS=Mus musculus OX=10090 GN=Med12 PE=1 SV=1	metabolic process;regulation of biological process;response to stimulus	membrane;nucleus	catalytic activity;DNA binding;protein binding;receptor activity	Med12	Thyroid hormone signaling pathway	PluriNetWork	1.08215e+07	8.91818e+06	6.90301e+06	6.22777e+06	8633027	2.0326e+07	8.56197e+06	8.86556e+06	1.96833e+07	1.95676e+07
Q8K4B0	Metastasis-associated protein MTA1 OS=Mus musculus OX=10090 GN=Mta1 PE=1 SV=1	cell organization and biogenesis;metabolic process;regulation of biological process;response to stimulus	cytoplasm;cytoskeleton;cytosol;endoplasmic reticulum;Golgi;nucleus	DNA binding;metal ion binding;protein binding	Mta1		PluriNetWork	153142	0	0	0	212785	203157	179441	123593	0	172226
Q60972	Histone-binding protein RBBP4 OS=Mus musculus OX=10090 GN=Rbbp4 PE=1 SV=5	cell organization and biogenesis;metabolic process;regulation of biological process;response to stimulus	cytosol;nucleus	catalytic activity;DNA binding;protein binding	Rbbp4		PluriNetWork	1.68878e+06	1.2266e+06	0	1.50344e+06	3.31864e+06	3.80077e+06	2.51744e+06	2.7545e+06	3.08317e+06	2.16416e+06
Q8CD92	Tetratricopeptide repeat protein 27 OS=Mus musculus OX=10090 GN=Ttc27 PE=1 SV=2			protein binding	Ttc27			5.75742e+06	4.76612e+06	6.63117e+06	4.05246e+06	7629910	5.44702e+06	1.30624e+07	1.34583e+07	1.11666e+07	1.01456e+07
P53986	Monocarboxylate transporter 1 OS=Mus musculus OX=10090 GN=Slc16a1 PE=1 SV=1	cell organization and biogenesis;metabolic process;regulation of biological process;response to stimulus;transport	membrane;mitochondrion	protein binding;transporter activity	Slc16a1			5.59511e+06	3.15857e+06	4.6042e+06	0	8.08375e+06	7.42818e+06	7.2319e+06	6.8379e+06	4.06472e+06	1.40068e+07
Q99ME9	Nucleolar GTP-binding protein 1 OS=Mus musculus OX=10090 GN=Gtpbp4 PE=1 SV=3	cell differentiation;metabolic process;regulation of biological process;response to stimulus	cytoplasm;cytosol;Golgi;membrane;nucleus	catalytic activity;nucleotide binding;RNA binding	Gtpbp4	Ribosome biogenesis in eukaryotes		0	0	1.20759e+06	0	1.26071e+06	754414	1.25985e+06	0	959426	1.57768e+06
O35857	Mitochondrial import inner membrane translocase subunit TIM44 OS=Mus musculus OX=10090 GN=Timm44 PE=1 SV=2	transport	membrane;mitochondrion;organelle lumen	nucleotide binding;protein binding	Timm44			1.02966e+06	0	1.00014e+06	0	1.7525e+06	1.64544e+06	1.66441e+06	2.32529e+06	1.32268e+06	0
Q9CXY6	Interleukin enhancer-binding factor 2 OS=Mus musculus OX=10090 GN=Ilf2 PE=1 SV=1	metabolic process;regulation of biological process;response to stimulus	cytoplasm;extracellular;membrane;nucleus	catalytic activity;DNA binding;nucleotide binding;RNA binding	Ilf2			0	591327	0	734893	0	312244	394964	331123	466919	931112
Q9QZQ8	Core histone macro-H2A.1 OS=Mus musculus OX=10090 GN=H2afy PE=1 SV=3	cell organization and biogenesis;regulation of biological process	chromosome;nucleus	DNA binding;enzyme regulator activity;protein binding	H2afy	Alcoholism; Systemic lupus erythematosus		0	1.14022e+06	1.30476e+06	0	1362080	1.64208e+06	1.40378e+06	1.66528e+06	2.2712e+06	0
P70268	Serine/threonine-protein kinase N1 OS=Mus musculus OX=10090 GN=Pkn1 PE=1 SV=3	cell death;cell organization and biogenesis;cellular component movement;metabolic process;regulation of biological process;response to stimulus	cytoplasm;endosome;membrane;nucleus	catalytic activity;nucleotide binding;protein binding	Pkn1	Salmonella infection; PI3K-Akt signaling pathway	TNF-alpha NF-kB Signaling Pathway; G13 Signaling Pathway	3.70497e+06	3.87323e+06	3.11885e+06	3.16115e+06	3.63118e+06	6.36779e+06	6.03739e+06	5.50328e+06	7.05884e+06	7.0928e+06
Q61036	Serine/threonine-protein kinase PAK 3 OS=Mus musculus OX=10090 GN=Pak3 PE=1 SV=2	cell organization and biogenesis;cellular component movement;development;metabolic process;regulation of biological process;response to stimulus	cytoplasm;cytosol;endosome	catalytic activity;metal ion binding;nucleotide binding;protein binding	Pak3	ErbB signaling pathway; T cell receptor signaling pathway; Regulation of actin cytoskeleton; Ras signaling pathway; Focal adhesion; Axon guidance; Renal cell carcinoma	G13 Signaling Pathway; Regulation of Actin Cytoskeleton; Integrin-mediated Cell Adhesion; Focal Adhesion	0	3.69048e+06	4.0731e+06	3.28979e+06	2632821	5.83238e+06	5.43477e+06	5.02671e+06	5.80489e+06	2.95564e+06
Q08122	Transducin-like enhancer protein 3 OS=Mus musculus OX=10090 GN=Tle3 PE=1 SV=3	cell differentiation;development;metabolic process;regulation of biological process;response to stimulus	nucleus	protein binding	Tle3		White fat cell differentiation; Adipogenesis genes	1.45317e+07	1.44074e+07	1.54148e+07	2.86036e+07	9.12746e+07	1.31348e+07	1.1583e+08	1.31322e+07	1.44113e+08	1.15209e+07
Q9CQ60	6-phosphogluconolactonase OS=Mus musculus OX=10090 GN=Pgls PE=1 SV=1	metabolic process	cytoplasm	catalytic activity	Pgls	Metabolic pathways; Pentose phosphate pathway; Carbon metabolism	Pentose Phosphate Pathway	200453	302778	296388	0	467138	382416	521364	361784	650063	365035
Q60960	Importin subunit alpha-5 OS=Mus musculus OX=10090 GN=Kpna1 PE=1 SV=2	transport	cytoplasm;cytosol;nucleus	protein binding;transporter activity	Kpna1	Influenza A		1.33618e+06	0	2.97725e+06	0	3.41634e+06	3.24404e+06	4.92141e+06	3.55969e+06	0	2.15193e+06
Q9JJ80	Ribosome production factor 2 homolog OS=Mus musculus OX=10090 GN=Rpf2 PE=2 SV=2	cell organization and biogenesis;metabolic process;regulation of biological process	nucleus	RNA binding	Rpf2			1.78989e+06	1.6277e+06	0	0	1.37602e+06	3.03566e+06	2.01121e+06	0	1.81346e+06	1.71283e+06
O08808	Protein diaphanous homolog 1 OS=Mus musculus OX=10090 GN=Diaph1 PE=1 SV=1	cell organization and biogenesis;metabolic process;regulation of biological process;response to stimulus	cytoplasm;cytoskeleton;membrane	catalytic activity;motor activity;protein binding;RNA binding	Diap1; Diaph1	AGE-RAGE signaling pathway in diabetic complications; Regulation of actin cytoskeleton; Focal adhesion	G13 Signaling Pathway; Regulation of Actin Cytoskeleton; Focal Adhesion	258103	0	270755	222083	276545	260655	215981	356577	650899	352260
P51410	60S ribosomal protein L9 OS=Mus musculus OX=10090 GN=Rpl9 PE=2 SV=2	metabolic process	membrane;nucleus;ribosome	RNA binding;structural molecule activity	Rpl9	Ribosome	Cytoplasmic Ribosomal Proteins; mRNA processing	0	2.40381e+06	3.07962e+06	0	3.66676e+06	2.53288e+06	4.12995e+06	4.91705e+06	4.75322e+06	0
Q9D5T0	ATPase family AAA domain-containing protein 1 OS=Mus musculus OX=10090 GN=Atad1 PE=1 SV=1	metabolic process;regulation of biological process;response to stimulus	membrane;mitochondrion;nucleus	catalytic activity;nucleotide binding;protein binding;RNA binding	Atad1			2.73573e+06	1.76339e+06	1.12267e+06	0	2.74862e+06	994089	2.82751e+06	3.72572e+06	2.25605e+06	5.12778e+06
Q921F2	TAR DNA-binding protein 43 OS=Mus musculus OX=10090 GN=Tardbp PE=1 SV=1	cell organization and biogenesis;metabolic process;regulation of biological process;response to stimulus	cytoplasm;nucleus	DNA binding;protein binding;RNA binding	Tardbp		mRNA processing	0	1.36681e+06	1.8915e+06	0	0	0	2.2395e+06	910457	2.65993e+06	0
O35593	26S proteasome non-ATPase regulatory subunit 14 OS=Mus musculus OX=10090 GN=Psmd14 PE=1 SV=2	metabolic process;regulation of biological process;response to stimulus	nucleus;proteasome	catalytic activity;enzyme regulator activity;metal ion binding;protein binding	Psmd14	Proteasome; Epstein-Barr virus infection		567806	0	258404	230296	436821	449078	644829	402723	567083	594788
O35218	Cleavage and polyadenylation specificity factor subunit 2 OS=Mus musculus OX=10090 GN=Cpsf2 PE=1 SV=1	metabolic process	membrane;nucleus	RNA binding	Cpsf2	mRNA surveillance pathway	mRNA processing	1.71836e+06	3.0743e+06	3.88077e+06	0	1233415	1.38302e+06	4.93143e+06	4.19645e+06	4.04131e+06	3.06172e+06
Q8K1C9	Leucine-rich repeat-containing protein 41 OS=Mus musculus OX=10090 GN=Lrrc41 PE=1 SV=3	metabolic process	cytoplasm;membrane;nucleus	protein binding	Lrrc41			7.63006e+06	5.50645e+06	2.4807e+06	0	5.58178e+06	4.99968e+06	7.96885e+06	9.76085e+06	8.85682e+06	6.09086e+06
Q6P9R2	Serine/threonine-protein kinase OSR1 OS=Mus musculus OX=10090 GN=Oxsr1 PE=1 SV=1	metabolic process;regulation of biological process;response to stimulus	cytoplasm;cytosol	catalytic activity;metal ion binding;nucleotide binding;protein binding;signal transducer activity	Oxsr1			2.13092e+06	1.7687e+06	0	0	0	1.87178e+06	1.86053e+06	1.52897e+06	1.66866e+06	0
Q3UFM5	Nucleolar MIF4G domain-containing protein 1 OS=Mus musculus OX=10090 GN=Nom1 PE=1 SV=2	cell differentiation	nucleus	protein binding;RNA binding	Nom1			4.12973e+06	2.95232e+06	5.13855e+06	1.02676e+06	2.19508e+06	3.19231e+06	2.85695e+06	7.50948e+06	7.0832e+06	6.66349e+06
P63028	Translationally-controlled tumor protein OS=Mus musculus OX=10090 GN=Tpt1 PE=1 SV=1	cell differentiation;regulation of biological process	cytoplasm;cytosol;endosome;nucleus	metal ion binding;protein binding;RNA binding	Tpt1			0	0	1.5733e+06	2.24658e+06	2.11617e+06	1.73297e+06	2.58799e+06	2.26125e+06	1.98186e+06	1.92758e+06
P23591	GDP-L-fucose synthase OS=Mus musculus OX=10090 GN=Tsta3 PE=1 SV=3	metabolic process		catalytic activity;protein binding	Tsta3	Metabolic pathways; Amino sugar and nucleotide sugar metabolism; Fructose and mannose metabolism		4.01395e+06	4.15263e+06	3.47228e+06	2.90481e+06	3.57471e+06	5.49831e+06	7.13673e+06	7.60642e+06	3.61517e+06	8.11944e+06
B2RRE7	OTU domain-containing protein 4 OS=Mus musculus OX=10090 GN=Otud4 PE=1 SV=1	metabolic process		catalytic activity;RNA binding	Otud4			1.60157e+06	2.06588e+06	5.20783e+06	2.08854e+06	6.04687e+06	6.99688e+06	6.00241e+06	2.78723e+06	2.47961e+06	1.17305e+07
Q9CQA3	Succinate dehydrogenase [ubiquinone] iron-sulfur subunit, mitochondrial OS=Mus musculus OX=10090 GN=Sdhb PE=1 SV=1	metabolic process;transport	membrane;mitochondrion	catalytic activity;metal ion binding	Sdhb	Citrate cycle (TCA cycle); Metabolic pathways; Huntington's disease; Non-alcoholic fatty liver disease (NAFLD); Oxidative phosphorylation; Parkinson's disease; Alzheimer's disease; Carbon metabolism	Electron Transport Chain; TCA Cycle	101249	0	0	65883.4	180035	120872	154711	83095.4	109152	142282
Q8BL97	Serine/arginine-rich splicing factor 7 OS=Mus musculus OX=10090 GN=Srsf7 PE=1 SV=1	metabolic process;regulation of biological process;transport	cytoplasm;nucleus	metal ion binding;protein binding;RNA binding	Srsf7	Herpes simplex infection; Spliceosome	mRNA processing	0	562220	733033	752036	775402	1.14254e+06	1.43043e+06	1.00009e+06	801629	582645
O35344	Importin subunit alpha-4 OS=Mus musculus OX=10090 GN=Kpna3 PE=1 SV=1	transport	cytoplasm;cytosol;nucleus	protein binding;transporter activity	Kpna3		TNF-alpha NF-kB Signaling Pathway	659123	252269	3.22734e+06	0	2.25389e+06	0	2.98769e+06	2.19975e+06	3.8811e+06	2.14782e+06
Q8CDG3	Deubiquitinating protein VCIP135 OS=Mus musculus OX=10090 GN=Vcpip1 PE=1 SV=1	cell organization and biogenesis;metabolic process	cytoplasm;endoplasmic reticulum;Golgi	catalytic activity	Vcpip1			3.8593e+06	4.69529e+06	5.79681e+06	4.1043e+06	3.67787e+06	9.64908e+06	6.47674e+06	7.28687e+06	6.22105e+06	9.02261e+06
Q65Z40	Wings apart-like protein homolog OS=Mus musculus OX=10090 GN=Wapl PE=1 SV=2	cell division;cell organization and biogenesis;regulation of biological process;response to stimulus	chromosome;cytoplasm;nucleus		Wapal; Wapl			5.70649e+06	5.2306e+06	2.87198e+06	3.80165e+06	4.93895e+06	6.1309e+06	9.58101e+06	7.04956e+06	5.75083e+06	1.08539e+07
Q9D0M1	Phosphoribosyl pyrophosphate synthase-associated protein 1 OS=Mus musculus OX=10090 GN=Prpsap1 PE=1 SV=1	metabolic process;regulation of biological process		catalytic activity;enzyme regulator activity;metal ion binding;protein binding	Prpsap1			2.24438e+06	4.67771e+06	4.65993e+06	3.10336e+06	5.32106e+06	8.20262e+06	5.19594e+06	9.19791e+06	5.574e+06	6.7296e+06
Q9Z2I0	Mitochondrial proton/calcium exchanger protein OS=Mus musculus OX=10090 GN=Letm1 PE=1 SV=1	cell organization and biogenesis;cellular homeostasis;transport	membrane;mitochondrion	metal ion binding;transporter activity	Letm1			2.35533e+06	448565	0	320131	1.70842e+06	1.76167e+06	1.47848e+06	2.00781e+06	1.3884e+06	1.77117e+06
Q8R010	Aminoacyl tRNA synthase complex-interacting multifunctional protein 2 OS=Mus musculus OX=10090 GN=Aimp2 PE=1 SV=2	cell death;cell differentiation;cell organization and biogenesis;development;metabolic process;regulation of biological process	cytoplasm;cytosol;membrane;nucleus	protein binding;structural molecule activity	Aimp2		Keap1-Nrf2	879637	1.61546e+06	1.97563e+06	0	2.30177e+06	4.0901e+06	1.82953e+06	2.72149e+06	1.56548e+06	1.5721e+06
Q8BX17	Gem-associated protein 5 OS=Mus musculus OX=10090 GN=Gemin5 PE=1 SV=2	cell organization and biogenesis;metabolic process;regulation of biological process	cytoplasm;cytosol;membrane;nucleus	protein binding;RNA binding	Gemin5	RNA transport		1.13562e+07	2.09544e+06	2.46884e+06	0	3.68292e+06	9.60329e+06	3.84225e+06	1.14435e+07	9.12257e+06	0
Q62159	Rho-related GTP-binding protein RhoC OS=Mus musculus OX=10090 GN=Rhoc PE=1 SV=2	cell organization and biogenesis;cellular component movement;regulation of biological process;response to stimulus	cytosol;membrane;nucleus	catalytic activity;nucleotide binding;protein binding;signal transducer activity	Rhoc		Spinal Cord Injury	1.43822e+06	1.97503e+06	0	0	1.50595e+06	1.44905e+06	1.83061e+06	1.83512e+06	1.81264e+06	1.58771e+06
P25911	Tyrosine-protein kinase Lyn OS=Mus musculus OX=10090 GN=Lyn PE=1 SV=4	cell communication;cell differentiation;cell organization and biogenesis;defense response;metabolic process;regulation of biological process;response to stimulus;transport	cytoplasm;cytosol;Golgi;membrane;nucleus;vacuole	catalytic activity;nucleotide binding;protein binding	Lyn	Epstein-Barr virus infection; Chemokine signaling pathway; Platelet activation; B cell receptor signaling pathway; Fc gamma R-mediated phagocytosis; Long-term depression; NF-kappa B signaling pathway; Fc epsilon RI signaling pathway; Viral carcinogenesis	IL-5 Signaling Pathway; Chemokine signaling pathway; IL-7 Signaling Pathway; Microglia Pathogen Phagocytosis Pathway; IL-3 Signaling Pathway; IL-6 signaling Pathway; Kit Receptor Signaling Pathway; IL-2 Signaling Pathway	0	733019	0	0	794958	468691	607606	611130	273901	680794
P61963	DDB1- and CUL4-associated factor 7 OS=Mus musculus OX=10090 GN=Dcaf7 PE=1 SV=1	development;metabolic process	cytoplasm;cytosol;nucleus	protein binding	Dcaf7		TNF-alpha NF-kB Signaling Pathway	4.82242e+06	0	0	0	2931508	1.57618e+06	3.55168e+06	2.21086e+06	2.01144e+06	4.00097e+06
Q9D2V7	Coronin-7 OS=Mus musculus OX=10090 GN=Coro7 PE=1 SV=2	cell organization and biogenesis;cellular component movement;transport	cytoplasm;cytosol;Golgi;membrane	protein binding	Coro7			1.8547e+06	1.73263e+06	0	0	0	0	1.95972e+06	1.82922e+06	995415	1.39011e+06
Q8BZN6	Dedicator of cytokinesis protein 10 OS=Mus musculus OX=10090 GN=Dock10 PE=1 SV=3	cell differentiation;cell organization and biogenesis;regulation of biological process;response to stimulus	cytoplasm;membrane;nucleus	protein binding	Dock10			0	0	0	0	4.80157e+06	1.71517e+06	2.37874e+06	1.99808e+06	2.13138e+06	0
P35951	Low-density lipoprotein receptor OS=Mus musculus OX=10090 GN=Ldlr PE=1 SV=2	metabolic process;regulation of biological process;response to stimulus;transport	cell surface;endosome;Golgi;membrane;vacuole	metal ion binding;protein binding;receptor activity	Ldlr	Endocytosis; Ovarian steroidogenesis; Toxoplasmosis; Bile secretion; Hepatitis C; Aldosterone synthesis and secretion	Statin Pathway; SREBF and miR33 in cholesterol and lipid homeostasis; Wnt Signaling Pathway; Wnt Signaling Pathway and Pluripotency	4.71055e+06	7.86672e+06	2.60628e+06	9.38605e+06	4.00659e+06	7.85273e+06	2.96274e+06	5.39383e+06	1.88801e+07	1.38509e+07
O09061	Proteasome subunit beta type-1 OS=Mus musculus OX=10090 GN=Psmb1 PE=1 SV=1	metabolic process	cytoplasm;cytosol;nucleus;proteasome	catalytic activity	Psmb1	Proteasome	Proteasome Degradation	0	1.71672e+06	0	2.67622e+06	1.9064e+06	2.81372e+06	1.24798e+06	2.21886e+06	2.77974e+06	1.7265e+06
Q9Z315	U4/U6.U5 tri-snRNP-associated protein 1 OS=Mus musculus OX=10090 GN=Sart1 PE=1 SV=1	cell organization and biogenesis;metabolic process;regulation of biological process	Golgi;nucleus;spliceosomal complex	RNA binding	Sart1	Spliceosome		1.27542e+06	2.25607e+06	2.94858e+06	1.99101e+06	4.21434e+06	3.60791e+06	4.4689e+06	3.99285e+06	3.8917e+06	5.74312e+06
Q2YDW2	Protein misato homolog 1 OS=Mus musculus OX=10090 GN=Msto1 PE=1 SV=1	cell organization and biogenesis	cytoplasm;membrane;mitochondrion	catalytic activity	Msto1			794841	1.47268e+06	0	897103	0	1.77294e+06	0	1.67722e+06	0	1.95807e+06
Q3UDE2	Tubulin--tyrosine ligase-like protein 12 OS=Mus musculus OX=10090 GN=Ttll12 PE=1 SV=1	metabolic process		catalytic activity;nucleotide binding	Ttll12			784710	553481	0	403855	776235	532988	1.27896e+06	791240	923390	769759
Q8CI94	Glycogen phosphorylase, brain form OS=Mus musculus OX=10090 GN=Pygb PE=1 SV=3	metabolic process	cytoplasm;membrane	catalytic activity;protein binding	Pygb	Insulin signaling pathway; Metabolic pathways; Insulin resistance; Starch and sucrose metabolism; Glucagon signaling pathway	Glycogen Metabolism	264830	142607	147314	0	0	180838	325893	0	192541	245251
Q9D880	Mitochondrial import inner membrane translocase subunit TIM50 OS=Mus musculus OX=10090 GN=Timm50 PE=1 SV=1	cell organization and biogenesis;metabolic process;transport	membrane;mitochondrion	catalytic activity;protein binding	Timm50			0	0	1.02218e+06	1.10379e+06	1.37517e+06	944206	1.50554e+06	958325	1.31731e+06	1.23104e+06
Q8BVE3	V-type proton ATPase subunit H OS=Mus musculus OX=10090 GN=Atp6v1h PE=1 SV=1	cellular homeostasis;transport	membrane	catalytic activity;transporter activity	Atp6v1h	mTOR signaling pathway; Rheumatoid arthritis; Metabolic pathways; Tuberculosis; Lysosome; Phagosome; Oxidative phosphorylation; Synaptic vesicle cycle		433910	329144	0	0	408510	403167	491243	257654	361446	469265
P50431	Serine hydroxymethyltransferase, cytosolic OS=Mus musculus OX=10090 GN=Shmt1 PE=1 SV=3	cell organization and biogenesis;metabolic process;regulation of biological process	cytoplasm;cytosol;mitochondrion;nucleus	catalytic activity;protein binding;RNA binding;translation regulator activity	Shmt1	Metabolic pathways; Biosynthesis of amino acids; Glycine, serine and threonine metabolism; Antifolate resistance; Carbon metabolism; One carbon pool by folate; Glyoxylate and dicarboxylate metabolism	One carbon metabolism and related pathways; One Carbon Metabolism; Glutathione and one carbon metabolism	0	1.66189e+06	0	1.73543e+06	2579887	2.45955e+06	2.33215e+06	1.99852e+06	1.71261e+06	1.56844e+06
Q8K3X4	Probable E3 ubiquitin-protein ligase IRF2BPL OS=Mus musculus OX=10090 GN=Irf2bpl PE=1 SV=1	regulation of biological process	nucleus	metal ion binding	Irf2bpl			2.47632e+06	2.91353e+06	0	0	0	1.14366e+06	0	5.75325e+06	0	2.15972e+06
Q922S4	cGMP-dependent 3',5'-cyclic phosphodiesterase OS=Mus musculus OX=10090 GN=Pde2a PE=1 SV=4							1.55314e+06	793092	1.5697e+06	0	1.60739e+06	2.05073e+06	2.0033e+06	2.17072e+06	1.14321e+06	1.89024e+06
O70378	ER membrane protein complex subunit 8 OS=Mus musculus OX=10090 GN=Emc8 PE=1 SV=1		cytoplasm;cytosol;membrane;mitochondrion		Emc8			1.40044e+06	0	1.2211e+06	1.3874e+06	0	0	0	0	3.11958e+06	3.58289e+06
Q9Y4X5	E3 ubiquitin-protein ligase ARIH1 OS=Homo sapiens OX=9606 GN=ARIH1 PE=1 SV=2	metabolic process;regulation of biological process	cytoplasm;cytosol;nucleus	catalytic activity;metal ion binding;protein binding	ARIH1			5.69482e+06	3.17134e+06	1.90721e+06	4.01611e+06	6.79046e+06	6.81461e+06	7.22064e+06	7.63373e+06	6.97596e+06	7.36202e+06
Q9JKC8	AP-3 complex subunit mu-1 OS=Mus musculus OX=10090 GN=Ap3m1 PE=1 SV=1	cellular component movement;transport	Golgi;membrane	protein binding	Ap3m1	Lysosome		1.44201e+07	1.1932e+07	1.52915e+07	9.4696e+06	1.82191e+07	1.90536e+07	2.95504e+07	2.30862e+07	1.81718e+07	2.51608e+07
D0QMC3	Myeloid cell nuclear differentiation antigen-like protein OS=Mus musculus OX=10090 GN=Mndal PE=1 SV=1	regulation of biological process	cytosol;membrane;nucleus	DNA binding;protein binding;RNA binding	Mndal			849532	0	2.45851e+06	2.27497e+06	2.84622e+06	1.03442e+06	2.18469e+06	0	4.68512e+06	6.00556e+06
Q8C3I8	Protein HGH1 homolog OS=Mus musculus OX=10090 GN=Hgh1 PE=1 SV=1				Fam203a; Hgh1			1.12132e+07	4.06142e+06	3.43507e+06	7.39081e+06	1.75954e+07	9.53465e+06	2.11376e+07	1.8946e+07	8.38296e+06	1.4039e+07
P48193	Protein 4.1 OS=Mus musculus OX=10090 GN=Epb41 PE=1 SV=2	cell division;cell organization and biogenesis;regulation of biological process;transport	cytoplasm;cytoskeleton;cytosol;membrane;nucleus	protein binding;structural molecule activity	Epb4.1; Epb41	Tight junction	Splicing factor NOVA regulated synaptic proteins	1.48041e+06	1.46238e+06	0	0	0	0	1.35434e+06	0	1.44589e+06	2.02646e+06
Q8R3Y5	Uncharacterized protein C19orf47 homolog OS=Mus musculus OX=10090 PE=1 SV=2				2310022A10Rik			1.89795e+07	2.23156e+07	3.40557e+07	2.7809e+07	2.58331e+07	4.24311e+07	4.64065e+07	4.17077e+07	2.92571e+07	5.1603e+07
Q8BIJ6	Isoleucine--tRNA ligase, mitochondrial OS=Mus musculus OX=10090 GN=Iars2 PE=1 SV=1	metabolic process;regulation of biological process	cytoplasm;cytosol;mitochondrion;organelle lumen	catalytic activity;nucleotide binding;RNA binding	Iars2	Aminoacyl-tRNA biosynthesis		0	559270	711655	0	1.67937e+06	1.34152e+06	2.22042e+06	403137	858332	0
Q8C147	Dedicator of cytokinesis protein 8 OS=Mus musculus OX=10090 GN=Dock8 PE=1 SV=4	cell proliferation;cellular component movement;regulation of biological process;response to stimulus	cytoplasm;membrane	protein binding	Dock8			0	1.58938e+06	1.16523e+06	1.44139e+06	0	1.71966e+06	1.34309e+06	0	1.44691e+06	2.34283e+06
Q80YR5	Scaffold attachment factor B2 OS=Mus musculus OX=10090 GN=Safb2 PE=1 SV=2	cell differentiation;metabolic process;regulation of biological process	cytoplasm;nucleus	DNA binding;protein binding;RNA binding	Safb2		mRNA processing	0	0	0	5.13241e+06	0	3.48988e+06	0	0	0	4.86455e+06
Q921E2	Ras-related protein Rab-31 OS=Mus musculus OX=10090 GN=Rab31 PE=1 SV=1	cell organization and biogenesis;metabolic process;regulation of biological process;response to stimulus;transport	endosome;Golgi;membrane	catalytic activity;nucleotide binding	Rab31	Endocytosis		2.83544e+06	0	2.96338e+06	0	1000289	2.52365e+06	0	2.7818e+06	2.66199e+06	3.04416e+06
Q6P1B1	Xaa-Pro aminopeptidase 1 OS=Mus musculus OX=10090 GN=Xpnpep1 PE=1 SV=1	metabolic process	cytoplasm;cytosol	catalytic activity;metal ion binding;protein binding	Xpnpep1			0	0	5.64415e+06	0	5.48864e+06	4.90015e+06	4.0664e+06	4.42155e+06	4.62376e+06	0
Q8BRF7	Sec1 family domain-containing protein 1 OS=Mus musculus OX=10090 GN=Scfd1 PE=1 SV=1	cell organization and biogenesis;regulation of biological process;response to stimulus;transport	cytoplasm;endoplasmic reticulum;Golgi;membrane	protein binding	Scfd1			785935	608844	0	535220	735307	892804	906637	666705	1.03878e+06	807195
Q07813	Apoptosis regulator BAX OS=Mus musculus OX=10090 GN=Bax PE=1 SV=1	cell death;cell differentiation;cell organization and biogenesis;cell proliferation;cellular component movement;cellular homeostasis;metabolic process;regulation of biological process;response to stimulus;transport	cytoplasm;cytosol;endoplasmic reticulum;membrane;mitochondrion;nucleus	protein binding;transporter activity	Bax	AGE-RAGE signaling pathway in diabetic complications; Platinum drug resistance; p53 signaling pathway; Amyotrophic lateral sclerosis (ALS); Tuberculosis; Hepatitis B; HTLV-I infection; Longevity regulating pathway; Huntington's disease; Sphingolipid signaling pathway; Apoptosis - multiple species; Non-alcoholic fatty liver disease (NAFLD); Neurotrophin signaling pathway; Pathways in cancer; Prion…	Apoptosis; IL-5 Signaling Pathway; miRNA regulation of DNA Damage Response; IL-7 Signaling Pathway; IL-3 Signaling Pathway	1.68629e+06	2.52001e+06	3.39738e+06	4.06325e+06	4713474	6.77219e+06	5.7623e+06	5.17184e+06	4.3168e+06	4.42854e+06
Q64105	Sepiapterin reductase OS=Mus musculus OX=10090 GN=Spr PE=1 SV=1	cell organization and biogenesis;metabolic process;regulation of biological process;response to stimulus	cytoplasm;cytosol;mitochondrion	catalytic activity;protein binding	Spr			2.47706e+06	3.12127e+06	1.21045e+06	0	2.2751e+06	3.10883e+06	1.81348e+06	0	6.50388e+06	3.23484e+06
Q7TSC1	Protein PRRC2A OS=Mus musculus OX=10090 GN=Prrc2a PE=1 SV=1	cell differentiation	cytoplasm;membrane;nucleus	RNA binding	Prrc2a			2.58169e+06	0	4.15384e+06	1.65441e+06	2.78585e+06	2.80317e+06	4.46854e+06	2.51504e+06	3.77751e+06	4.44258e+06
P26040	Ezrin OS=Mus musculus OX=10090 GN=Ezr PE=1 SV=3	cell differentiation;cell organization and biogenesis;metabolic process;regulation of biological process;response to stimulus;transport	cytoplasm;cytoskeleton;cytosol;endosome;membrane	protein binding;RNA binding	Ezr	Leukocyte transendothelial migration; Regulation of actin cytoskeleton; MicroRNAs in cancer; Proteoglycans in cancer; Gastric acid secretion	Regulation of Actin Cytoskeleton	0	138151	0	149383	324683	210380	225201	184821	174208	191622
Q8BH86	D-glutamate cyclase, mitochondrial OS=Mus musculus OX=10090 GN=Dglucy PE=1 SV=1	metabolic process	mitochondrion;organelle lumen	catalytic activity	9030617O03Rik; Dglucy			6.77394e+06	3.41623e+06	3.38837e+06	3.42564e+06	3.19904e+06	8.08383e+06	6.91377e+06	7.90063e+06	7.46799e+06	2.128e+06
Q3UJB9	Enhancer of mRNA-decapping protein 4 OS=Mus musculus OX=10090 GN=Edc4 PE=1 SV=2	metabolic process	cytoplasm;membrane;nucleus	protein binding	Edc4	RNA degradation		0	0	928314	0	1.22763e+06	0	1.39111e+06	1.00136e+06	0	1.06246e+06
Q8R016	Bleomycin hydrolase OS=Mus musculus OX=10090 GN=Blmh PE=1 SV=1	metabolic process;response to stimulus	cytoplasm;nucleus	catalytic activity;protein binding	Blmh			0	5.71214e+06	8.34671e+06	8.41618e+06	9786780	9.14678e+06	1.06019e+07	8.77839e+06	1.23149e+07	1.06491e+07
Q5SV85	Synergin gamma OS=Mus musculus OX=10090 GN=Synrg PE=1 SV=1	transport	cytoplasm;cytosol;Golgi;membrane	protein binding	Synrg			1.65951e+07	1.17194e+07	1.33773e+07	1.04117e+07	1.38193e+07	1.60848e+07	1.80491e+07	1.98944e+07	2.62819e+07	2.47921e+07
Q8BJZ4	28S ribosomal protein S35, mitochondrial OS=Mus musculus OX=10090 GN=Mrps35 PE=1 SV=2		mitochondrion;ribosome	RNA binding;structural molecule activity	Mrps35			1.19985e+07	2.28359e+06	6.7878e+06	5.76496e+06	8.82268e+06	8.30427e+06	1.06055e+07	1.21021e+07	9.29859e+06	1.64345e+07
Q9JI11	Serine/threonine-protein kinase 4 OS=Mus musculus OX=10090 GN=Stk4 PE=1 SV=1	cell death;cell differentiation;cell organization and biogenesis;metabolic process;regulation of biological process;response to stimulus	cytoplasm;cytosol;nucleus	catalytic activity;metal ion binding;nucleotide binding;protein binding	Stk4	FoxO signaling pathway; MAPK signaling pathway; Ras signaling pathway; Non-small cell lung cancer; Pathways in cancer		1.8138e+06	2.15063e+06	1.96157e+06	0	2.28259e+06	3.31842e+06	2.0228e+06	3.99512e+06	1.81067e+06	1.89745e+06
Q00422	GA-binding protein alpha chain OS=Mus musculus OX=10090 GN=Gabpa PE=1 SV=2	metabolic process;regulation of biological process;response to stimulus	nucleus	DNA binding;protein binding	Gabpa		Mitochondrial Gene Expression; Myometrial Relaxation and Contraction Pathways	2.83051e+06	2.69309e+06	2.84977e+06	1.68141e+06	3205244	3.98771e+06	4.5541e+06	4.169e+06	3.93927e+06	4.40511e+06
Q99J77	Sialic acid synthase OS=Mus musculus OX=10090 GN=Nans PE=1 SV=1	metabolic process	cytoplasm;cytosol	catalytic activity	Nans	Metabolic pathways; Amino sugar and nucleotide sugar metabolism		0	2.12449e+06	1.81432e+06	1.45985e+06	0	0	1.57e+06	1.49817e+06	2.27352e+06	3.21269e+06
Q3TX08	tRNA (guanine(26)-N(2))-dimethyltransferase OS=Mus musculus OX=10090 GN=Trmt1 PE=1 SV=2	metabolic process	mitochondrion;nucleus	catalytic activity;metal ion binding;RNA binding	Trmt1			4.33862e+06	5.79168e+06	4.8136e+06	2.25738e+06	9.60787e+06	8.96267e+06	8.87063e+06	1.05572e+07	6.76408e+06	7.30794e+06
Q9R207	Nibrin OS=Mus musculus OX=10090 GN=Nbn PE=1 SV=1	cell organization and biogenesis;cell proliferation;metabolic process;regulation of biological process;response to stimulus	chromosome;nucleus	catalytic activity;DNA binding;protein binding	Nbn	Homologous recombination	Homologous recombination; miRNA regulation of DNA Damage Response	2.75931e+06	2.30991e+06	2.7345e+06	2.03892e+06	0	3.99819e+06	2.92813e+06	4.02317e+06	2.25524e+06	2.36064e+06
Q3UX10	Tubulin alpha chain-like 3 OS=Mus musculus OX=10090 GN=Tubal3 PE=2 SV=2	cell organization and biogenesis	cytoplasm;cytoskeleton	catalytic activity;nucleotide binding;structural molecule activity	Tubal3	Phagosome; Gap junction; Apoptosis		926798	1.48415e+06	881012	0	842466	1.34533e+06	953366	974769	1.85355e+06	1.39035e+06
Q16777	Histone H2A type 2-C OS=Homo sapiens OX=9606 GN=HIST2H2AC PE=1 SV=4	regulation of biological process	chromosome;nucleus	DNA binding;protein binding	HIST2H2AC	Systemic lupus erythematosus; Alcoholism		1.01296e+07	1.01547e+07	8.87216e+06	1.16145e+07	9010365	1.94983e+07	1.28431e+07	1.52546e+07	1.62764e+07	1.45469e+07
Q6PGH1	Protein BUD31 homolog OS=Mus musculus OX=10090 GN=Bud31 PE=1 SV=2							5.69095e+06	3.11722e+06	2.23799e+06	2.38729e+06	2890062	4.92014e+06	3.37555e+06	6.10794e+06	5.3988e+06	5.90451e+06
Q62193	Replication protein A 32 kDa subunit OS=Mus musculus OX=10090 GN=Rpa2 PE=1 SV=1	cell organization and biogenesis;metabolic process;regulation of biological process;response to stimulus	chromosome;nucleus	DNA binding;protein binding	Rpa2		DNA Replication; G1 to S cell cycle control	6.41801e+06	7.08003e+06	407195	3.65839e+06	749715	5.44348e+06	5.8298e+06	5.01174e+06	6.89393e+06	5.58941e+06
P62915	Transcription initiation factor IIB OS=Mus musculus OX=10090 GN=Gtf2b PE=1 SV=1	cell organization and biogenesis;metabolic process;regulation of biological process	nucleus	DNA binding;metal ion binding;protein binding	Gtf2b	Basal transcription factors; Epstein-Barr virus infection; Viral carcinogenesis	Estrogen signaling; Eukaryotic Transcription Initiation	416127	640842	472089	511669	737565	872028	823529	584833	1.31841e+06	762964
Q8BP67	60S ribosomal protein L24 OS=Mus musculus OX=10090 GN=Rpl24 PE=1 SV=2	cell organization and biogenesis;cellular component movement;metabolic process;regulation of biological process	cytoplasm;membrane;ribosome	protein binding;RNA binding;structural molecule activity	Rpl24	Ribosome	Cytoplasmic Ribosomal Proteins	1.40287e+06	1.38405e+06	1.12245e+06	0	1.63423e+06	2.14066e+06	2.05096e+06	1.27191e+06	1.37209e+06	1.83961e+06
Q8C0L0	Thioredoxin-related transmembrane protein 4 OS=Mus musculus OX=10090 GN=Tmx4 PE=1 SV=2	cellular homeostasis;metabolic process;regulation of biological process;response to stimulus;transport	endoplasmic reticulum;membrane	catalytic activity	Tmx4			2.98993e+07	2.71569e+07	2.96302e+07	1.91138e+07	3.06052e+07	6.37547e+07	3.14583e+07	4.58595e+07	4.25472e+07	2.95371e+07
Q921J4	Ubiquitin-conjugating enzyme E2 S OS=Mus musculus OX=10090 GN=Ube2s PE=1 SV=1	cell division;cell organization and biogenesis;metabolic process	cytoplasm;nucleus	catalytic activity;nucleotide binding;protein binding	Ube2s	Ubiquitin mediated proteolysis		1.53013e+07	1.65257e+07	1.56965e+07	1.41607e+07	18510355	2.36236e+07	3.15861e+07	2.46296e+07	2.96974e+07	1.57002e+07
P49710	Hematopoietic lineage cell-specific protein OS=Mus musculus OX=10090 GN=Hcls1 PE=1 SV=2	cell differentiation;cell organization and biogenesis;regulation of biological process;response to stimulus	cytoplasm;cytosol;membrane;mitochondrion;nucleus	protein binding	Hcls1	Proteoglycans in cancer; Tight junction; Bacterial invasion of epithelial cells	IL-5 Signaling Pathway; TYROBP Causal Network	412081	823611	677261	2.08832e+06	796273	762799	957145	3.85556e+06	1.3345e+06	577532
Q5U4D9	THO complex subunit 6 homolog OS=Mus musculus OX=10090 GN=Thoc6 PE=1 SV=1	cell death;development;metabolic process;regulation of biological process;transport	nucleus	protein binding;RNA binding	Thoc6	RNA transport		8.83852e+06	4.37671e+06	3.47417e+06	2.41524e+06	4.20033e+06	8.7428e+06	5.64386e+06	7.42634e+06	7.97936e+06	6.54538e+06
Q91VU7	Pseudouridylate synthase 7 homolog OS=Mus musculus OX=10090 GN=Pus7 PE=2 SV=2	metabolic process	nucleus	catalytic activity;protein binding;RNA binding	Pus7			0	1.80894e+06	2.76624e+06	1.66853e+06	2898285	3.75987e+06	3.48391e+06	3.71129e+06	3.2889e+06	0
Q9EPU4	Cleavage and polyadenylation specificity factor subunit 1 OS=Mus musculus OX=10090 GN=Cpsf1 PE=1 SV=1	metabolic process	nucleus	protein binding;RNA binding	Cpsf1	mRNA surveillance pathway	mRNA processing	1.02692e+06	1.81474e+06	500457	1.92264e+06	858690	1.2479e+06	1.74771e+06	629535	3.14345e+06	2.77103e+06
Q7TSG2	RNA polymerase II subunit A C-terminal domain phosphatase OS=Mus musculus OX=10090 GN=Ctdp1 PE=1 SV=1	cell division;metabolic process;regulation of biological process	cytoplasm;cytoskeleton;nucleus	catalytic activity;protein binding	Ctdp1			2.8496e+06	1.84076e+06	3.70215e+06	2.11277e+06	2.68223e+06	1.29028e+06	5.89134e+06	4.87376e+06	7.31177e+06	1.13113e+06
Q8BV13	COP9 signalosome complex subunit 7b OS=Mus musculus OX=10090 GN=Cops7b PE=1 SV=1	metabolic process	cytoplasm;nucleus	protein binding	Cops7b			2.36431e+06	6.11389e+06	3.26364e+06	5.24598e+06	3.74998e+06	8.37834e+06	2.27918e+06	6.54686e+06	8.02147e+06	6.99298e+06
Q9Z1G3	V-type proton ATPase subunit C 1 OS=Mus musculus OX=10090 GN=Atp6v1c1 PE=1 SV=4	transport	cytoplasm;membrane	catalytic activity;transporter activity	Atp6v1c1	mTOR signaling pathway; Rheumatoid arthritis; Metabolic pathways; Phagosome; Oxidative phosphorylation; Synaptic vesicle cycle; Collecting duct acid secretion		2.44666e+06	3.06929e+06	4.71226e+06	945420	4.06904e+06	4.87429e+06	7.29295e+06	4.24526e+06	2.35329e+06	4.76926e+06
Q9CZJ1	Probable U3 small nucleolar RNA-associated protein 11 OS=Mus musculus OX=10090 GN=Utp11 PE=2 SV=1	metabolic process;regulation of biological process	cytoplasm;nucleus	RNA binding	Utp11l; Utp11			7.78194e+06	6.50393e+06	8.80328e+06	5.79469e+06	1.22542e+07	1.14073e+07	1.24997e+07	1.25464e+07	1.23652e+07	1.46107e+07
Q8K2F0	Bromodomain-containing protein 3 OS=Mus musculus OX=10090 GN=Brd3 PE=1 SV=2	cell organization and biogenesis;metabolic process;regulation of biological process	nucleus	protein binding	Brd3			2.99839e+07	13328952	1.7408e+07	1.06606e+07	1.91282e+07	2.63701e+07	2.36929e+07	2.55273e+07	3.59876e+07	2.74151e+07
Q80Y81	Zinc phosphodiesterase ELAC protein 2 OS=Mus musculus OX=10090 GN=Elac2 PE=1 SV=1	cell organization and biogenesis;metabolic process	mitochondrion;nucleus	catalytic activity;metal ion binding;RNA binding	Elac2	RNA transport		146787	400596	325364	0	770208	503292	513217	683781	467118	353503
Q9CWL8	Beta-catenin-like protein 1 OS=Mus musculus OX=10090 GN=Ctnnbl1 PE=1 SV=1	cell death;regulation of biological process	membrane;nucleus;spliceosomal complex	protein binding	Ctnnbl1	Spliceosome		4.02438e+06	4.26064e+06	1.98056e+06	1.48218e+06	2.72679e+06	5.42352e+06	2.28702e+06	4.4743e+06	5.0244e+06	4.9532e+06
Q8K1I7	WAS/WASL-interacting protein family member 1 OS=Mus musculus OX=10090 GN=Wipf1 PE=1 SV=1	cell organization and biogenesis;cellular component movement;regulation of biological process;response to stimulus	cytoplasm;cytoskeleton	protein binding	Wipf1	Endocytosis		6.28382e+06	6.85136e+06	4.55131e+06	2.73294e+06	0	6.65214e+06	0	8.13645e+06	8.77573e+06	7.64306e+06
O70305	Ataxin-2 OS=Mus musculus OX=10090 GN=Atxn2 PE=1 SV=1	cell differentiation;cell organization and biogenesis;regulation of biological process	cytoplasm;Golgi;membrane	protein binding;RNA binding	Atxn2			3.68863e+06	1.19613e+06	883473	3.27795e+06	4.94284e+06	1.58837e+06	6.20703e+06	4.06089e+06	4.35101e+06	5.12623e+06
Q7TQH0	Ataxin-2-like protein OS=Mus musculus OX=10090 GN=Atxn2l PE=1 SV=1	cell organization and biogenesis;regulation of biological process	cytoplasm;cytosol;membrane;nucleus	protein binding;RNA binding	Atxn2l			4.39911e+06	1.79577e+06	1.40773e+06	1.4755e+06	1.68716e+06	1.82302e+06	1.45265e+06	4.08468e+06	4.40224e+06	4.65433e+06
Q8K2C9	Very-long-chain (3R)-3-hydroxyacyl-CoA dehydratase 3 OS=Mus musculus OX=10090 GN=Hacd3 PE=1 SV=2	metabolic process;regulation of biological process;response to stimulus	cytosol;endoplasmic reticulum;membrane;mitochondrion	catalytic activity;protein binding	Ptplad1; Hacd3	Fatty acid metabolism; Fatty acid elongation; Biosynthesis of unsaturated fatty acids		5.49998e+06	7.56236e+06	6.48726e+06	6.80205e+06	6512664	1.19829e+07	1.18026e+07	1.18461e+07	5.07877e+06	9.37446e+06
O54734	Dolichyl-diphosphooligosaccharide--protein glycosyltransferase 48 kDa subunit OS=Mus musculus OX=10090 GN=Ddost PE=1 SV=2	metabolic process;response to stimulus	endoplasmic reticulum;membrane	catalytic activity	Ddost	Metabolic pathways; N-Glycan biosynthesis; Protein processing in endoplasmic reticulum		0	0	2.54347e+06	1.13623e+06	0	0	5.60345e+06	0	0	0
Q9ESD6	CKLF-like MARVEL transmembrane domain-containing protein 7 OS=Mus musculus OX=10090 GN=Cmtm7 PE=1 SV=1	cell differentiation;regulation of biological process;response to stimulus	membrane	protein binding	Cmtm7			6.29416e+07	6.02571e+07	5.50886e+07	6.53197e+07	7.10426e+07	1.31818e+08	8.05651e+07	8.05053e+07	1.0413e+08	8.21021e+07
Q61595	Kinectin OS=Mus musculus OX=10090 GN=Ktn1 PE=1 SV=1	cellular component movement;regulation of biological process	endoplasmic reticulum;membrane	protein binding	Ktn1		TNF-alpha NF-kB Signaling Pathway	4.17426e+06	0	804122	0	4610321	0	4.7786e+06	4.12032e+06	1.27585e+06	4.39286e+06
Q9R1P1	Proteasome subunit beta type-3 OS=Mus musculus OX=10090 GN=Psmb3 PE=1 SV=1	metabolic process	cytoplasm;cytosol;nucleus;proteasome	catalytic activity	Psmb3	Proteasome	Proteasome Degradation	3.69931e+06	2.85186e+06	2.55687e+06	0	2.47617e+06	2.34766e+06	3.06824e+06	2.79887e+06	4.42344e+06	4.95809e+06
P16627	Heat shock 70 kDa protein 1-like OS=Mus musculus OX=10090 GN=Hspa1l PE=1 SV=4	cell differentiation;cell organization and biogenesis;development;metabolic process	cytosol;mitochondrion;organelle lumen	nucleotide binding;protein binding	Hspa1l	Endocytosis; MAPK signaling pathway; Toxoplasmosis; Epstein-Barr virus infection; Spliceosome; Legionellosis; Influenza A; Antigen processing and presentation; Protein processing in endoplasmic reticulum; Estrogen signaling pathway; Measles; Longevity regulating pathway - multiple species		0	715751	1.49828e+06	0	921480	1.05426e+06	1.0317e+06	1.17138e+06	773461	726139
Q9DC48	Pre-mRNA-processing factor 17 OS=Mus musculus OX=10090 GN=Cdc40 PE=2 SV=1	metabolic process	nucleus;spliceosomal complex	protein binding;RNA binding	Cdc40	Spliceosome	mRNA processing	9.52544e+06	5.37975e+06	6.72136e+06	9.74743e+06	7.95493e+06	1.19581e+07	1.66816e+07	1.06639e+07	1.13951e+07	8.96268e+06
Q99KD5	Protein unc-45 homolog A OS=Mus musculus OX=10090 GN=Unc45a PE=1 SV=2	cell differentiation;development;metabolic process	cytoplasm;cytosol;Golgi;nucleus	protein binding	Unc45a			7.82811e+06	1.98136e+06	931182	686658	8685344	5.07805e+06	7.41777e+06	5.21639e+06	4.21708e+06	8.56355e+06
Q9DB05	Alpha-soluble NSF attachment protein OS=Mus musculus OX=10090 GN=Napa PE=1 SV=1	cell communication;cell differentiation;cell organization and biogenesis;regulation of biological process;transport	membrane	protein binding	Napa	Synaptic vesicle cycle		0	446306	227639	585023	596430	540592	574505	361010	717708	599782
A2BE28	Ribosomal biogenesis protein LAS1L OS=Mus musculus OX=10090 GN=Las1l PE=1 SV=1	cell organization and biogenesis;metabolic process	cytoplasm;membrane;nucleus	RNA binding	Las1l			843226	1.19591e+06	1.46579e+06	0	1.30275e+06	1.16333e+06	1.52374e+06	1.76743e+06	972770	1.81064e+06
Q9D1D4	Transmembrane emp24 domain-containing protein 10 OS=Mus musculus OX=10090 GN=Tmed10 PE=1 SV=1	cell organization and biogenesis;regulation of biological process;response to stimulus;transport	endoplasmic reticulum;Golgi;membrane	protein binding	Tmed10		mRNA processing	345425	413046	272643	0	339872	349709	463970	398290	382035	469912
A2BH40	AT-rich interactive domain-containing protein 1A OS=Mus musculus OX=10090 GN=Arid1a PE=1 SV=1	cell differentiation;cell organization and biogenesis;metabolic process;regulation of biological process;response to stimulus;transport	nucleus	DNA binding;protein binding	Arid1a			854444	1.77865e+06	1.99731e+06	0	2.49926e+06	1.81704e+06	3.06888e+06	2.21568e+06	2.14674e+06	1.48304e+06
A2BDX3	Adenylyltransferase and sulfurtransferase MOCS3 OS=Mus musculus OX=10090 GN=Mocs3 PE=1 SV=1	metabolic process	cytoplasm;cytosol	catalytic activity;metal ion binding;nucleotide binding	Mocs3	Sulfur relay system		2.94718e+06	2.3164e+06	3.06182e+06	0	2.55905e+06	2.33558e+06	6.23067e+06	2.38845e+06	3.10642e+06	2.32018e+06
P63037	DnaJ homolog subfamily A member 1 OS=Mus musculus OX=10090 GN=Dnaja1 PE=1 SV=1	cellular component movement;metabolic process;regulation of biological process;response to stimulus;transport	cytoplasm;cytoskeleton;cytosol;endoplasmic reticulum;membrane;mitochondrion;nucleus	enzyme regulator activity;metal ion binding;nucleotide binding;protein binding	Dnaja1	Protein processing in endoplasmic reticulum	Exercise-induced Circadian Regulation; Exercise-induced Circadian Regulation	0	2.00644e+06	1.56627e+06	0	1.76048e+06	1.31496e+06	1.50445e+06	1.78555e+06	1.39493e+06	2.02334e+06
P63158	High mobility group protein B1 OS=Mus musculus OX=10090 GN=Hmgb1 PE=1 SV=2	cell differentiation;cell organization and biogenesis;cell proliferation;cellular component movement;cellular homeostasis;defense response;metabolic process;regulation of biological process;response to stimulus;transport	cell surface;chromosome;cytoplasm;endosome;extracellular;membrane;nucleus	catalytic activity;DNA binding;enzyme regulator activity;protein binding;RNA binding	Hmgb1; Gm21596; LOC100862258	Base excision repair		2.73023e+06	3.00828e+06	6.09773e+06	3.3739e+06	4862076	6.44615e+06	5.88348e+06	6.30691e+06	3.98284e+06	7.57504e+06
Q9R0E2	Procollagen-lysine,2-oxoglutarate 5-dioxygenase 1 OS=Mus musculus OX=10090 GN=Plod1 PE=1 SV=1	metabolic process;response to stimulus	endoplasmic reticulum;membrane	catalytic activity;metal ion binding;protein binding	Plod1	Lysine degradation		0	0	0	1.92548e+06	1.24058e+06	922965	648060	960595	1.20496e+06	1.02487e+06
O09172	Glutamate--cysteine ligase regulatory subunit OS=Mus musculus OX=10090 GN=Gclm PE=1 SV=1	cell organization and biogenesis;cellular homeostasis;metabolic process;regulation of biological process;response to stimulus		catalytic activity;enzyme regulator activity;protein binding	Gclm	Glutathione metabolism; Metabolic pathways; Cysteine and methionine metabolism	Keap1-Nrf2; Glutathione metabolism; One carbon metabolism and related pathways; Glutathione and one carbon metabolism	887185	9.6729e+06	6.72143e+06	3.28273e+06	8.57652e+06	8.63728e+06	8.37282e+06	9.0872e+06	9.99975e+06	7.72574e+06
Q8BGA5	KRR1 small subunit processome component homolog OS=Mus musculus OX=10090 GN=Krr1 PE=2 SV=1	metabolic process	cytoplasm;membrane;nucleus	RNA binding	Krr1			6.92576e+06	2.91791e+06	2.808e+06	3.36628e+06	8347658	7.86181e+06	6.94757e+06	6.31132e+06	7.42689e+06	8.07494e+06
P52479	Ubiquitin carboxyl-terminal hydrolase 10 OS=Mus musculus OX=10090 GN=Usp10 PE=1 SV=3	metabolic process;regulation of biological process;response to stimulus	cytoplasm;cytosol;endosome;nucleus	catalytic activity;protein binding;RNA binding	Usp10			2.07867e+06	0	0	2.02301e+06	2.52916e+06	2.0683e+06	2.29262e+06	1.84986e+06	1.86379e+06	1.88778e+06
Q9QYA2	Mitochondrial import receptor subunit TOM40 homolog OS=Mus musculus OX=10090 GN=Tomm40 PE=1 SV=3	transport	cytosol;membrane;mitochondrion	transporter activity	Tomm40	Amyotrophic lateral sclerosis (ALS)		1.61294e+06	2.6309e+06	1.35958e+06	1.57613e+06	2.7109e+06	2.77242e+06	3.89331e+06	2.34691e+06	2.69214e+06	3.0836e+06
Q3U319	E3 ubiquitin-protein ligase BRE1B OS=Mus musculus OX=10090 GN=Rnf40 PE=1 SV=2	cell organization and biogenesis;metabolic process;regulation of biological process;response to stimulus	cytosol;membrane;nucleus	catalytic activity;metal ion binding;protein binding;RNA binding	Rnf40			1.9836e+06	2.19646e+06	976428	0	1215602	1.56827e+06	1.37593e+06	1.47109e+06	3.19388e+06	1.91673e+06
P17897	Lysozyme C-1 OS=Mus musculus OX=10090 GN=Lyz1 PE=1 SV=1	defense response;metabolic process;response to stimulus	cytoplasm;extracellular;organelle lumen	catalytic activity;protein binding	Lyz1	Salivary secretion		2.98339e+06	1.71894e+06	1.17003e+06	0	2.66724e+06	3.47686e+06	2.57433e+06	4.3125e+06	1.09409e+06	1.30385e+06
Q6PGB6	N-alpha-acetyltransferase 50 OS=Mus musculus OX=10090 GN=Naa50 PE=1 SV=1	cell organization and biogenesis;metabolic process	cytoplasm;cytosol;nucleus	catalytic activity;protein binding	Naa50		Metapathway biotransformation	0	460542	0	0	423967	0	410059	327001	0	583754
P58681	Toll-like receptor 7 OS=Mus musculus OX=10090 GN=Tlr7 PE=1 SV=1	defense response;metabolic process;regulation of biological process;response to stimulus	cytoplasm;endoplasmic reticulum;endosome;membrane;vacuole	protein binding;receptor activity;RNA binding;signal transducer activity	Tlr7	Toll-like receptor signaling pathway; Influenza A; Measles		2.38754e+06	2.63224e+06	2.46539e+06	2.75866e+06	2.42306e+06	3.74485e+06	5.39025e+06	3.6802e+06	3.2743e+06	2.79321e+06
O88738	Baculoviral IAP repeat-containing protein 6 OS=Mus musculus OX=10090 GN=Birc6 PE=1 SV=2	cell death;cell division;metabolic process;regulation of biological process	cytoplasm;cytoskeleton;endosome;Golgi;membrane	catalytic activity;enzyme regulator activity;protein binding	Birc6	Ubiquitin mediated proteolysis; Apoptosis - multiple species		891074	634509	412558	561854	1.05105e+06	888981	1.28263e+06	883627	1.13814e+06	1.09878e+06
Q8R180	ERO1-like protein alpha OS=Mus musculus OX=10090 GN=Ero1a PE=1 SV=2	cell death;cell differentiation;cell organization and biogenesis;cellular homeostasis;metabolic process;regulation of biological process;response to stimulus;transport	endoplasmic reticulum;membrane	catalytic activity	Ero1l	Protein processing in endoplasmic reticulum		497768	236180	301487	420389	423392	413132	633661	507855	643111	599592
Q61655	ATP-dependent RNA helicase DDX19A OS=Mus musculus OX=10090 GN=Ddx19a PE=1 SV=2	metabolic process;regulation of biological process;transport	cytoplasm;membrane;nucleus;spliceosomal complex	catalytic activity;nucleotide binding;RNA binding	Ddx19a		mRNA processing	0	5.00161e+06	2.08218e+06	2.34227e+06	2396207	4.21225e+06	3.88586e+06	3.37092e+06	3.53226e+06	2.59379e+06
P70399	TP53-binding protein 1 OS=Mus musculus OX=10090 GN=Tp53bp1 PE=1 SV=3	cell organization and biogenesis;metabolic process;regulation of biological process;response to stimulus	chromosome;cytoplasm;nucleus	DNA binding;protein binding	Trp53bp1	NOD-like receptor signaling pathway		5.30499e+06	4.84396e+06	2.38755e+06	2.13922e+06	8.88986e+06	8.66311e+06	1.01313e+07	6.97054e+06	5.66194e+06	3.63537e+06
Q9JM76	Actin-related protein 2/3 complex subunit 3 OS=Mus musculus OX=10090 GN=Arpc3 PE=1 SV=3	cell organization and biogenesis;regulation of biological process;response to stimulus	cytoplasm;cytoskeleton;membrane	protein binding;structural molecule activity	Arpc3	Endocytosis; Regulation of actin cytoskeleton; Salmonella infection; Fc gamma R-mediated phagocytosis; Bacterial invasion of epithelial cells		1.25879e+07	1.03597e+07	1.3059e+07	1.33705e+07	1.39581e+07	1.35992e+07	2.32906e+07	1.84007e+07	2.34626e+07	1.54321e+07
Q9JII5	DAZ-associated protein 1 OS=Mus musculus OX=10090 GN=Dazap1 PE=1 SV=2	cell differentiation;cell proliferation;development;regulation of biological process	cytoplasm;cytosol;nucleus	RNA binding	Dazap1	mRNA surveillance pathway	mRNA processing	1.66101e+06	2.06674e+06	2.08658e+06	0	0	0	1.99354e+06	1.81416e+06	2.03788e+06	2.79381e+06
Q3TZX8	Polynucleotide 5'-hydroxyl-kinase NOL9 OS=Mus musculus OX=10090 GN=Nol9 PE=1 SV=1	metabolic process	cytoskeleton;membrane;nucleus	catalytic activity;enzyme regulator activity;nucleotide binding;RNA binding	Nol9			6.63021e+06	1.57669e+07	1.6085e+07	2.44615e+07	2.1328e+07	2.48457e+07	2.2537e+07	2.6273e+07	2.8684e+07	2.28063e+07
Q9QZE7	Translin-associated protein X OS=Mus musculus OX=10090 GN=Tsnax PE=1 SV=1	cell differentiation;development	cytoplasm;Golgi;nucleus	DNA binding;metal ion binding;protein binding;RNA binding	Tsnax			1.30664e+07	1.7375e+07	1.5605e+07	1.34181e+07	1.36385e+07	1.74858e+07	1.48189e+07	1.65822e+07	4.01655e+07	1.94442e+07
Q8K072	Receptor expression-enhancing protein 4 OS=Mus musculus OX=10090 GN=Reep4 PE=1 SV=1	cell division;cell organization and biogenesis	endoplasmic reticulum;membrane	protein binding	Reep4			2.31461e+07	2.16258e+07	1.26233e+07	4.13549e+06	1.24062e+07	3.11294e+07	1.8207e+07	1.55838e+07	2.04475e+07	2.42654e+07
Q9EQK5	Major vault protein OS=Mus musculus OX=10090 GN=Mvp PE=1 SV=4	cell proliferation;metabolic process;regulation of biological process;response to stimulus	cytoplasm;cytoskeleton;cytosol;membrane;nucleus	protein binding	Mvp			0	797559	333477	723735	514809	493368	577492	534657	1.14194e+06	763263
Q7TNC4	Putative RNA-binding protein Luc7-like 2 OS=Mus musculus OX=10090 GN=Luc7l2 PE=1 SV=1	cell organization and biogenesis	nucleus;spliceosomal complex	protein binding;RNA binding	Luc7l2			144244	0	55658.1	160937	145536	146338	126271	140916	183802	151996
O88696	ATP-dependent Clp protease proteolytic subunit, mitochondrial OS=Mus musculus OX=10090 GN=Clpp PE=1 SV=1	cell organization and biogenesis;metabolic process	mitochondrion;organelle lumen	catalytic activity;protein binding	Clpp			6.76535e+06	1.67272e+07	1.54458e+07	2.40294e+07	1.38591e+07	2.44662e+07	2.51325e+07	1.12378e+07	2.50227e+07	2.7827e+07
Q9JI99	Sphingosine-1-phosphate phosphatase 1 OS=Mus musculus OX=10090 GN=Sgpp1 PE=1 SV=1	metabolic process;regulation of biological process;response to stimulus	cytoskeleton;endoplasmic reticulum;Golgi;membrane;mitochondrion	catalytic activity;receptor activity;signal transducer activity	Sgpp1	Sphingolipid signaling pathway; Sphingolipid metabolism		9.36114e+06	1.05538e+07	6.70207e+06	0	2.66981e+06	5.62542e+06	0	3.77103e+07	0	0
Q8C3Y4	Kinetochore-associated protein 1 OS=Mus musculus OX=10090 GN=Kntc1 PE=1 SV=2	cell division;regulation of biological process	chromosome;cytoplasm;cytoskeleton;cytosol;membrane;nucleus	protein binding	Kntc1			1.00178e+07	6.62523e+06	4.87675e+06	5.94167e+06	4.91957e+06	4.70008e+06	1.56391e+07	5.41658e+06	1.23621e+07	9.73174e+06
Q8BTW3	Exosome complex component MTR3 OS=Mus musculus OX=10090 GN=Exosc6 PE=1 SV=1	metabolic process;regulation of biological process	cytoplasm;nucleus	RNA binding	Exosc6	RNA degradation		3.25868e+06	1.15315e+06	1.18419e+06	3.73693e+06	3.3632e+06	9.20407e+06	3.65904e+06	2.78384e+06	814690	2.28638e+06
Q6NSR8	Probable aminopeptidase NPEPL1 OS=Mus musculus OX=10090 GN=Npepl1 PE=1 SV=1	metabolic process	cytoplasm;nucleus	catalytic activity;metal ion binding	Npepl1			8.49631e+06	5.3106e+06	3.83051e+06	1.6776e+06	7.55365e+06	6.78284e+06	8.98316e+06	8.20674e+06	6.46659e+06	9.20323e+06
Q64261	Cyclin-dependent kinase 6 OS=Mus musculus OX=10090 GN=Cdk6 PE=1 SV=2	cell differentiation;cell division;metabolic process;regulation of biological process;response to stimulus	cytoplasm;cytoskeleton;cytosol;nucleus	catalytic activity;nucleotide binding;protein binding	Cdk6	p53 signaling pathway; MicroRNAs in cancer; Breast cancer; Melanoma; Small cell lung cancer; Hepatitis B; Non-small cell lung cancer; Cell cycle; Pathways in cancer; Pancreatic cancer; PI3K-Akt signaling pathway; Glioma; Viral carcinogenesis; Chronic myeloid leukemia; Measles	miRNA regulation of DNA Damage Response; G1 to S cell cycle control	1.50786e+06	1.68758e+06	0	2.10069e+06	0	1.72839e+06	1.40415e+06	1.33217e+06	1.86083e+06	1.48343e+06
P56183	Ribosomal RNA processing protein 1 homolog A OS=Mus musculus OX=10090 GN=Rrp1 PE=1 SV=2	metabolic process	nucleus	RNA binding	Rrp1			2.661e+06	1.33494e+06	2.0358e+06	2.92858e+06	3.21444e+06	2.7796e+06	3.79758e+06	2.87013e+06	4.39869e+06	4.10432e+06
P61514	60S ribosomal protein L37a OS=Mus musculus OX=10090 GN=Rpl37a PE=1 SV=2	metabolic process	nucleus;ribosome	metal ion binding;RNA binding;structural molecule activity	Rpl37a	Ribosome	Cytoplasmic Ribosomal Proteins	8.33785e+06	5.61924e+06	4.71307e+06	7.63603e+06	6.77479e+06	1.21945e+07	7.49427e+06	8.51571e+06	9.92074e+06	1.06412e+07
Q8N7N5	DDB1- and CUL4-associated factor 8 OS=Mus musculus OX=10090 GN=Dcaf8 PE=1 SV=1	metabolic process	cytoplasm;cytosol;mitochondrion;nucleus	protein binding	Dcaf8			2.82801e+07	2.54154e+07	2.12546e+07	1.39928e+07	2.88846e+07	2.7258e+07	4.43904e+07	3.0543e+07	3.38554e+07	3.73941e+07
Q05512	Serine/threonine-protein kinase MARK2 OS=Mus musculus OX=10090 GN=Mark2 PE=1 SV=3	cell differentiation;cell organization and biogenesis;cellular component movement;development;metabolic process;regulation of biological process;response to stimulus	cytoplasm;cytoskeleton;membrane;nucleus	catalytic activity;metal ion binding;nucleotide binding;protein binding;RNA binding	Mark2		TNF-alpha NF-kB Signaling Pathway; Wnt Signaling Pathway NetPath	546225	615895	913007	789060	848138	1.12305e+06	1.23907e+06	1.02523e+06	802915	1.26534e+06
Q6ZQL4	WD repeat-containing protein 43 OS=Mus musculus OX=10090 GN=Wdr43 PE=2 SV=2	metabolic process;regulation of biological process	nucleus	protein binding;RNA binding	Wdr43	Ribosome biogenesis in eukaryotes		0	2.45246e+06	2.85898e+06	3.83063e+06	4310965	0	2.48923e+06	5.3197e+06	7.82982e+06	4.06383e+06
Q3U7R1	Extended synaptotagmin-1 OS=Mus musculus OX=10090 GN=Esyt1 PE=1 SV=2	transport	endoplasmic reticulum;membrane	metal ion binding;protein binding	Esyt1			4.10765e+06	7.68765e+06	6.74258e+06	7.51764e+06	7782866	7.61521e+06	1.05212e+07	9.54248e+06	1.15741e+07	1.02943e+07
Q6NWW9	Fibronectin type III domain-containing protein 3B OS=Mus musculus OX=10090 GN=Fndc3b PE=1 SV=1	cell differentiation;cell organization and biogenesis;cellular component movement;regulation of biological process	endoplasmic reticulum;membrane	protein binding;RNA binding	Fndc3b			7.44259e+06	4.59023e+06	5.15424e+06	7.37241e+06	5225536	1.07639e+07	6.81437e+06	7.35732e+06	5.66857e+06	1.29857e+07
A2AN08	E3 ubiquitin-protein ligase UBR4 OS=Mus musculus OX=10090 GN=Ubr4 PE=1 SV=1	metabolic process	cytoplasm;cytoskeleton;cytosol;membrane;nucleus	catalytic activity;metal ion binding;protein binding	Ubr4	Viral carcinogenesis		371039	305787	279204	234931	0	290594	410356	372544	342253	325654
Q8C129	Leucyl-cystinyl aminopeptidase OS=Mus musculus OX=10090 GN=Lnpep PE=1 SV=1	cell communication;metabolic process;regulation of biological process;response to stimulus	membrane	catalytic activity;metal ion binding;protein binding	Lnpep	Renin-angiotensin system		2.37788e+07	1.30981e+07	1.72398e+07	1.31599e+07	18633556	2.40999e+07	2.27863e+07	2.55333e+07	2.78282e+07	2.53313e+07
P07091	Protein S100-A4 OS=Mus musculus OX=10090 GN=S100a4 PE=1 SV=1	regulation of biological process	extracellular;nucleus	metal ion binding;protein binding;RNA binding	S100a4			1.48076e+07	1.44074e+07	9.60772e+06	5.36549e+06	5.37326e+06	1.79993e+07	1.4671e+07	1.27461e+07	1.20271e+07	1.49779e+07
Q60787	Lymphocyte cytosolic protein 2 OS=Mus musculus OX=10090 GN=Lcp2 PE=1 SV=2	regulation of biological process;response to stimulus;transport	cytoplasm;cytosol;membrane	protein binding	Lcp2	T cell receptor signaling pathway; Platelet activation; Osteoclast differentiation; Rap1 signaling pathway; Natural killer cell mediated cytotoxicity; Fc epsilon RI signaling pathway		6.64973e+06	610877	1.18522e+07	1.0996e+07	0	6.4217e+06	4.65623e+06	9.12883e+06	1.4405e+07	9.35998e+06
P61087	Ubiquitin-conjugating enzyme E2 K OS=Mus musculus OX=10090 GN=Ube2k PE=1 SV=3	cell organization and biogenesis;metabolic process;regulation of biological process;response to stimulus	cytoplasm;nucleus	catalytic activity;nucleotide binding;protein binding	Ube2k	Ubiquitin mediated proteolysis		3.51143e+06	3.41551e+06	1.42708e+06	2.74736e+06	1.82977e+06	3.66999e+06	3.64868e+06	5.12757e+06	3.75806e+06	2.665e+06
Q3V009	Transmembrane emp24 domain-containing protein 1 OS=Mus musculus OX=10090 GN=Tmed1 PE=1 SV=1	transport	endoplasmic reticulum;Golgi;membrane		Tmed1			1.53078e+07	1.64273e+07	1.6045e+07	4.43826e+06	17763385	1.23761e+07	2.41747e+07	1.69429e+07	2.32895e+07	2.50673e+07
Q3UYV9	Nuclear cap-binding protein subunit 1 OS=Mus musculus OX=10090 GN=Ncbp1 PE=1 SV=2	cell organization and biogenesis;metabolic process;regulation of biological process;transport	cytoplasm;cytosol;mitochondrion;nucleus	protein binding;RNA binding	Ncbp1	mRNA surveillance pathway; Spliceosome; RNA transport		1.21784e+06	2.99744e+06	884010	0	1600935	1.82806e+06	1.72542e+06	2.27258e+06	2.60718e+06	1.29606e+06
Q6ZQK5	Arf-GAP with coiled-coil, ANK repeat and PH domain-containing protein 2 OS=Mus musculus OX=10090 GN=Acap2 PE=1 SV=2	regulation of biological process;response to stimulus	endosome;membrane	enzyme regulator activity;metal ion binding;protein binding	Acap2	Endocytosis		3.28107e+06	1.52818e+06	4.75803e+06	4.07845e+06	5380003	5.37862e+06	6.81809e+06	4.78898e+06	6.84261e+06	3.76326e+06
Q8K2Q9	Shootin-1 OS=Mus musculus OX=10090 GN=Shtn1 PE=1 SV=1	cell organization and biogenesis;cellular component movement;development;regulation of biological process;response to stimulus	cytoplasm;cytoskeleton	protein binding	4930506M07Rik; Shtn1			3.33424e+06	4.08553e+06	3.44481e+06	2.42208e+06	2.99975e+06	4.31501e+06	6.07786e+06	4.10166e+06	3.94347e+06	5.1767e+06
Q9Z2K1	Keratin, type I cytoskeletal 16 OS=Mus musculus OX=10090 GN=Krt16 PE=1 SV=3	cell differentiation;cell organization and biogenesis;cellular component movement;defense response;regulation of biological process;response to stimulus	cytoskeleton;nucleus	protein binding;structural molecule activity	Krt16			3.03233e+06	0	3.37672e+06	0	0	0	0	1.83774e+06	3.22273e+06	4.22574e+06
Q9WV70	Nucleolar complex protein 2 homolog OS=Mus musculus OX=10090 GN=Noc2l PE=1 SV=2	cell death;cell organization and biogenesis;metabolic process;regulation of biological process;response to stimulus	cytosol;nucleus	protein binding;RNA binding	Noc2l			2.27525e+06	1.93375e+06	3.58649e+06	2.43013e+06	2.39326e+06	5.80423e+06	2.5215e+06	2.31245e+06	5.02392e+06	2.58925e+06
Q9WVM1	Rac GTPase-activating protein 1 OS=Mus musculus OX=10090 GN=Racgap1 PE=1 SV=1	cell differentiation;cell division;cell organization and biogenesis;cell proliferation;development;regulation of biological process;response to stimulus;transport	cytoplasm;cytoskeleton;membrane;nucleus	enzyme regulator activity;metal ion binding;protein binding	Racgap1		Signal Transduction of S1P Receptor; Wnt Signaling Pathway and Pluripotency	1.09576e+07	1.3285e+07	7.6726e+06	15024259	9.45462e+06	1.69039e+07	1.66052e+07	1.63828e+07	1.63451e+07	1.53153e+07
O08547	Vesicle-trafficking protein SEC22b OS=Mus musculus OX=10090 GN=Sec22b PE=1 SV=3	cell organization and biogenesis;regulation of biological process;transport	endoplasmic reticulum;Golgi;membrane	protein binding	Sec22b	Phagosome; SNARE interactions in vesicular transport; Legionellosis		2.16346e+06	3.021e+06	2.77467e+06	2.4142e+06	3075141	2.40829e+06	3.34688e+06	3.2419e+06	6.01477e+06	4.42647e+06
O55142	60S ribosomal protein L35a OS=Mus musculus OX=10090 GN=Rpl35a PE=1 SV=2	metabolic process	membrane;mitochondrion;ribosome	RNA binding;structural molecule activity	Rpl35a-ps4; Rpl35a; Rpl35a-ps2; Gm10243; Rpl35a-ps5; LOC100862595; Gm14279; LOC100048620	Ribosome	Cytoplasmic Ribosomal Proteins	1.55242e+07	1.45587e+07	1.69627e+07	4.60165e+06	2.30242e+07	2.12556e+07	2.68619e+07	1.74146e+07	2.16797e+07	2.0572e+07
Q80YD1	ATP-dependent RNA helicase SUPV3L1, mitochondrial OS=Mus musculus OX=10090 GN=Supv3l1 PE=1 SV=1	cell organization and biogenesis;metabolic process;regulation of biological process	cytoplasm;mitochondrion;nucleus;organelle lumen	catalytic activity;DNA binding;nucleotide binding;protein binding;RNA binding	Supv3l1			4.98906e+06	5.03346e+06	3.90249e+06	4.4273e+06	4.11746e+06	7.08748e+06	7.83841e+06	5.9282e+06	3.81004e+06	7.73884e+06
O55098	Serine/threonine-protein kinase 10 OS=Mus musculus OX=10090 GN=Stk10 PE=1 SV=2	metabolic process;regulation of biological process;response to stimulus	cytoplasm;membrane	catalytic activity;nucleotide binding;protein binding	Stk10			1.12001e+06	7.02325e+06	1.07518e+07	6.9125e+06	1.45925e+07	1.3463e+07	1.55872e+07	1.4402e+07	9.14007e+06	5.63596e+06
Q9CPX6	Ubiquitin-like-conjugating enzyme ATG3 OS=Mus musculus OX=10090 GN=Atg3 PE=1 SV=1	cell communication;cell organization and biogenesis;metabolic process;regulation of biological process;response to stimulus;transport	cytoplasm;cytosol	catalytic activity;protein binding	Atg3	Autophagy		2.74076e+06	3.33641e+06	3.03885e+06	2.60202e+06	1.0921e+06	2.65337e+06	3.51737e+06	3.06562e+06	5.79534e+06	3.42427e+06
Q8CH72	E3 ubiquitin-protein ligase TRIM32 OS=Mus musculus OX=10090 GN=Trim32 PE=1 SV=2	cell differentiation;cell organization and biogenesis;cellular homeostasis;defense response;metabolic process;regulation of biological process;response to stimulus	cytoplasm;nucleus	catalytic activity;metal ion binding;protein binding;RNA binding	Trim32	Ubiquitin mediated proteolysis		3.43526e+07	3.42327e+07	3.33897e+07	3.36882e+07	4.2512e+07	4.77113e+07	5.79107e+07	5.59777e+07	4.48958e+07	4.98188e+07
Q8CFQ3	RNA helicase aquarius OS=Mus musculus OX=10090 GN=Aqr PE=1 SV=2	metabolic process	membrane;nucleus;spliceosomal complex	catalytic activity;DNA binding;nucleotide binding;RNA binding	Aqr	Spliceosome		6.68894e+06	4.91373e+06	5.00333e+06	0	8517897	7.15678e+06	7.9172e+06	8.00323e+06	7.08879e+06	5.96848e+06
Q9D0F9	Phosphoglucomutase-1 OS=Mus musculus OX=10090 GN=Pgm1 PE=1 SV=4	metabolic process	cytoplasm;cytoskeleton;cytosol	catalytic activity;metal ion binding	Pgm2	Metabolic pathways; Amino sugar and nucleotide sugar metabolism; Purine metabolism; Starch and sucrose metabolism; Glycolysis / Gluconeogenesis; Pentose phosphate pathway; Galactose metabolism	Glucuronidation; Purine metabolism; Glycogen Metabolism	405229	428612	352913	354927	471931	429440	493983	473833	809000	686839
Q922J9	Fatty acyl-CoA reductase 1 OS=Mus musculus OX=10090 GN=Far1 PE=1 SV=1	metabolic process	membrane	catalytic activity	Far1	Peroxisome		2.48413e+06	0	1.00692e+06	0	0	0	1.3461e+06	0	1.49102e+06	2.1762e+06
Q91YR5	eEF1A lysine and N-terminal methyltransferase OS=Mus musculus OX=10090 GN=EEF1AKNMT PE=1 SV=1	metabolic process		catalytic activity	Mettl13			1.26726e+07	7.80015e+06	6.49819e+06	3.60627e+06	1.23594e+07	1.17883e+07	1.78216e+07	1.87612e+07	5.65572e+06	7.60781e+06
P35282	Ras-related protein Rab-21 OS=Mus musculus OX=10090 GN=Rab21 PE=1 SV=4	cellular component movement;regulation of biological process;response to stimulus;transport	endoplasmic reticulum;endosome;Golgi;membrane	catalytic activity;nucleotide binding;protein binding	Rab21			891911	2.21579e+06	2.88055e+06	1.12207e+06	2.57891e+06	3.2263e+06	3.28059e+06	2.76422e+06	2.19206e+06	2.42919e+06
Q3UND0	Src kinase-associated phosphoprotein 2 OS=Mus musculus OX=10090 GN=Skap2 PE=1 SV=2	regulation of biological process;response to stimulus	cytoplasm;membrane	protein binding	Skap2			4.2469e+06	1.38301e+06	1.56529e+06	0	3045926	2.76226e+06	2.72681e+06	2.92833e+06	1.97767e+06	4.28653e+06
Q9R099	Transducin beta-like protein 2 OS=Mus musculus OX=10090 GN=Tbl2 PE=1 SV=2	cell communication;regulation of biological process;response to stimulus	cytoplasm;endoplasmic reticulum	protein binding;RNA binding	Tbl2			1.1255e+07	1.20151e+07	11068754	3.15275e+06	1.19344e+07	1.38624e+07	1.26878e+07	1.65065e+07	1.36292e+07	1.41493e+07
Q6ZWY3	40S ribosomal protein S27-like OS=Mus musculus OX=10090 GN=Rps27l PE=1 SV=3	cell organization and biogenesis;metabolic process;regulation of biological process;response to stimulus	nucleus;ribosome	enzyme regulator activity;metal ion binding;RNA binding;structural molecule activity;translation regulator activity	Rps27l			2.97749e+06	1.07993e+07	6.55723e+06	5.30733e+06	9.84382e+06	1.30975e+07	1.25466e+07	7.98213e+06	1.01139e+07	7.09742e+06
O08759	Ubiquitin-protein ligase E3A OS=Mus musculus OX=10090 GN=Ube3a PE=1 SV=2	metabolic process;regulation of biological process;response to stimulus;transport	cytoplasm;cytosol;nucleus;proteasome	catalytic activity;metal ion binding;protein binding	Ube3a	Ubiquitin mediated proteolysis; Viral carcinogenesis	Tryptophan metabolism	917808	3.67806e+06	3.84256e+06	3.37412e+06	1603635	5.84875e+06	4.32402e+06	2.42057e+06	3.56298e+06	3.05237e+06
O89110	Caspase-8 OS=Mus musculus OX=10090 GN=Casp8 PE=1 SV=1	cell death;cell differentiation;metabolic process;regulation of biological process;response to stimulus	cytoplasm;cytosol;membrane;mitochondrion;nucleus	catalytic activity;protein binding	Casp8	Herpes simplex infection; Platinum drug resistance; Chagas disease (American trypanosomiasis); p53 signaling pathway; TNF signaling pathway; NOD-like receptor signaling pathway; Toxoplasmosis; RIG-I-like receptor signaling pathway; Tuberculosis; Hepatitis B; Huntington's disease; Apoptosis - multiple species; Non-alcoholic fatty liver disease (NAFLD); Toll-like receptor signaling pathway; Legione…	Apoptosis; Apoptosis Modulation by HSP70; Alzheimers Disease; miRNA regulation of DNA Damage Response; TNF-alpha NF-kB Signaling Pathway; MAPK signaling pathway; FAS pathway and Stress induction of HSP regulation; Toll Like Receptor signaling	1.55376e+06	690414	0	786749	860701	1.67008e+06	1.26785e+06	1.32505e+06	1.30199e+06	0
Q9D2R0	Acetoacetyl-CoA synthetase OS=Mus musculus OX=10090 GN=Aacs PE=1 SV=1	cell differentiation;cellular homeostasis;metabolic process;regulation of biological process;response to stimulus	cytoplasm;cytosol	catalytic activity;nucleotide binding	Aacs	Valine, leucine and isoleucine degradation; Butanoate metabolism		4.68296e+06	0	2.78999e+06	1.99634e+06	2360770	4.16783e+06	3.35186e+06	3.09789e+06	2.95671e+06	3.33892e+06
Q3TTY5	Keratin, type II cytoskeletal 2 epidermal OS=Mus musculus OX=10090 GN=Krt2 PE=1 SV=1	cell organization and biogenesis;cell proliferation;cellular component movement;metabolic process	cytoskeleton;membrane;nucleus	protein binding;structural molecule activity	Krt2			5.05201e+06	4.33122e+06	1.86712e+06	2.15136e+06	4.82426e+06	6.38983e+06	4.65455e+06	6.1011e+06	5.45526e+06	3.42659e+06
P84096	Rho-related GTP-binding protein RhoG OS=Mus musculus OX=10090 GN=Rhog PE=1 SV=1	cell organization and biogenesis;cellular component movement;regulation of biological process;response to stimulus	membrane	catalytic activity;nucleotide binding;protein binding	Rhog	Salmonella infection; Bacterial invasion of epithelial cells		0	1.90856e+06	1.92262e+06	1.49664e+06	2119476	2.72096e+06	2.52442e+06	2.48712e+06	1.441e+06	1.44678e+06
Q9JKB1	Ubiquitin carboxyl-terminal hydrolase isozyme L3 OS=Mus musculus OX=10090 GN=Uchl3 PE=1 SV=2	metabolic process;regulation of biological process;response to stimulus	cytoplasm;cytosol;nucleus	catalytic activity;protein binding	Uchl3		Proteasome Degradation	5.4446e+06	7.22242e+06	9.22535e+06	8.38335e+06	7501483	1.23762e+07	9.25991e+06	1.302e+07	1.35393e+07	5.64234e+06
Q3UVK0	Endoplasmic reticulum metallopeptidase 1 OS=Mus musculus OX=10090 GN=Ermp1 PE=1 SV=2	metabolic process	endoplasmic reticulum;membrane	catalytic activity;metal ion binding	Ermp1			5.95085e+06	9.01095e+06	1.04825e+07	1.08758e+07	1.00693e+07	1.6086e+07	9.04926e+06	1.07434e+07	1.67492e+07	1.3428e+07
Q9CQF3	Cleavage and polyadenylation specificity factor subunit 5 OS=Mus musculus OX=10090 GN=Nudt21 PE=1 SV=1	cell organization and biogenesis;metabolic process	nucleus	catalytic activity;protein binding;RNA binding	Nudt21	mRNA surveillance pathway	mRNA processing	6.12686e+06	5.71776e+06	6.77271e+06	2.50499e+06	8186114	7.96229e+06	9.47963e+06	7.23298e+06	7.61939e+06	9.42206e+06
P53657	Pyruvate kinase PKLR OS=Mus musculus OX=10090 GN=Pklr PE=1 SV=1	metabolic process;response to stimulus	cytoplasm;cytosol	catalytic activity;metal ion binding;nucleotide binding	Pklr		Glycolysis and Gluconeogenesis; Purine metabolism	483961	943139	747231	740071	1.2808e+06	721916	1.50022e+06	883262	950440	1.90642e+06
Q80UJ7	Rab3 GTPase-activating protein catalytic subunit OS=Mus musculus OX=10090 GN=Rab3gap1 PE=1 SV=4	cell organization and biogenesis;regulation of biological process;response to stimulus;transport	cytoplasm;Golgi	enzyme regulator activity;protein binding	Rab3gap1			5.87942e+06	5.28451e+06	5.75118e+06	0	4.96869e+06	4.45106e+06	7.45907e+06	6.22024e+06	7.59977e+06	5.36085e+06
Q9CXW2	28S ribosomal protein S22, mitochondrial OS=Mus musculus OX=10090 GN=Mrps22 PE=1 SV=1		mitochondrion;ribosome	structural molecule activity	Mrps22			2.37362e+07	1.96482e+07	1.52792e+07	7.69899e+06	24015968	2.11423e+07	2.97596e+07	3.02517e+07	2.22841e+07	2.48094e+07
P61750	ADP-ribosylation factor 4 OS=Mus musculus OX=10090 GN=Arf4 PE=1 SV=2	cellular component movement;metabolic process;regulation of biological process;response to stimulus;transport	cytoplasm;cytosol;Golgi;membrane	catalytic activity;nucleotide binding;protein binding;signal transducer activity	Arf4		EGFR1 Signaling Pathway	1.13478e+06	0	0	0	862426	689498	907400	0	0	1.23537e+06
Q80VL1	Tudor and KH domain-containing protein OS=Mus musculus OX=10090 GN=Tdrkh PE=1 SV=1	cell differentiation;cell organization and biogenesis;metabolic process;regulation of biological process	cytoplasm;cytosol;mitochondrion	protein binding;RNA binding	Tdrkh			1.18313e+07	8.40175e+06	7.267e+06	759538	11886772	1.11293e+07	9.65408e+06	1.13687e+07	1.1272e+07	1.32745e+07
Q6P1F6	Serine/threonine-protein phosphatase 2A 55 kDa regulatory subunit B alpha isoform OS=Mus musculus OX=10090 GN=Ppp2r2a PE=1 SV=1	metabolic process;regulation of biological process;response to stimulus	cytosol	catalytic activity;enzyme regulator activity;protein binding	Ppp2r2a	mRNA surveillance pathway; Chagas disease (American trypanosomiasis); Dopaminergic synapse; Hippo signaling pathway; Sphingolipid signaling pathway; Hepatitis C; PI3K-Akt signaling pathway; AMPK signaling pathway; Tight junction; Adrenergic signaling in cardiomyocytes	Glycogen Metabolism; IL-6 signaling Pathway; Wnt Signaling Pathway and Pluripotency	1.70183e+06	1.75109e+07	1.28163e+07	1.27947e+07	1.10592e+07	1.34662e+07	1.69097e+07	1.50317e+07	1.81635e+07	1.53122e+07
P15307	Proto-oncogene c-Rel OS=Mus musculus OX=10090 GN=Rel PE=1 SV=2	defense response;metabolic process;regulation of biological process;response to stimulus	cytoplasm;cytosol;nucleus	DNA binding;protein binding	Rel		PluriNetWork; TNF-alpha NF-kB Signaling Pathway	1.21098e+07	1.08083e+07	1.76992e+07	1.10816e+07	1.3643e+07	1.70875e+07	2.21938e+07	1.51598e+07	1.285e+07	2.46197e+07
Q9CR51	V-type proton ATPase subunit G 1 OS=Mus musculus OX=10090 GN=Atp6v1g1 PE=1 SV=3	cellular homeostasis;response to stimulus;transport	cytosol;membrane	catalytic activity;protein binding;transporter activity	Atp6v1g1	mTOR signaling pathway; Rheumatoid arthritis; Metabolic pathways; Phagosome; Oxidative phosphorylation; Synaptic vesicle cycle; Collecting duct acid secretion	Osteoclast	4.40324e+07	1.6004e+07	4.64483e+07	5.39239e+06	58244061	4.90472e+07	5.29606e+07	5.06846e+07	3.63085e+07	5.01446e+07
Q3TDN2	FAS-associated factor 2 OS=Mus musculus OX=10090 GN=Faf2 PE=1 SV=2	cell organization and biogenesis;metabolic process;regulation of biological process;response to stimulus;transport	cytoplasm;endoplasmic reticulum	enzyme regulator activity;protein binding	Faf2			1.3916e+07	1.43869e+07	1.69209e+07	1.01472e+07	20417090	2.67549e+07	2.3426e+07	1.88394e+07	1.43164e+07	2.31533e+07
Q9D0D4	Probable dimethyladenosine transferase OS=Mus musculus OX=10090 GN=Dimt1 PE=2 SV=1	metabolic process;regulation of biological process	cytosol;nucleus;organelle lumen	catalytic activity;RNA binding	Dimt1			7.54392e+06	8.07936e+06	7.76034e+06	8.66998e+06	7.36738e+06	7.97646e+06	1.34452e+07	1.00132e+07	1.04046e+07	1.34866e+07
P24369	Peptidyl-prolyl cis-trans isomerase B OS=Mus musculus OX=10090 GN=Ppib PE=1 SV=2	metabolic process;regulation of biological process	endoplasmic reticulum;membrane;nucleus;organelle lumen	catalytic activity;protein binding;RNA binding	Ppib			1.60274e+07	1.35823e+07	9.51488e+06	8.39934e+06	1.31594e+07	1.63843e+07	1.87675e+07	1.45256e+07	1.53819e+07	1.98525e+07
Q810A7	ATP-dependent RNA helicase DDX42 OS=Mus musculus OX=10090 GN=Ddx42 PE=1 SV=3	metabolic process;regulation of biological process	cytoplasm;cytosol;membrane;nucleus	catalytic activity;nucleotide binding;RNA binding	Ddx42	Spliceosome		0	0	0	0	5627628	3.11812e+06	0	4.75323e+06	0	0
P84244	Histone H3.3 OS=Mus musculus OX=10090 GN=H3f3a PE=1 SV=2	cell differentiation;cell organization and biogenesis;cell proliferation;regulation of biological process;response to stimulus	chromosome;nucleus	DNA binding;protein binding	H3f3a; H3f3b	Transcriptional misregulation in cancer; Alcoholism; Systemic lupus erythematosus	PluriNetWork	6.78728e+06	6.90615e+06	3.64968e+06	4.96348e+06	3.67067e+06	7.37653e+06	7.58789e+06	8.25679e+06	7.34725e+06	5.7386e+06
P35123	Ubiquitin carboxyl-terminal hydrolase 4 OS=Mus musculus OX=10090 GN=Usp4 PE=1 SV=3	cell organization and biogenesis;metabolic process;regulation of biological process	cytoplasm;cytosol;membrane;nucleus	catalytic activity;metal ion binding;protein binding	Usp4			2.00914e+06	0	3.22049e+06	1.465e+06	3.12872e+06	3.27721e+06	3.29039e+06	2.05949e+06	1.47375e+06	3.61661e+06
Q6PGG2	GEM-interacting protein OS=Mus musculus OX=10090 GN=Gmip PE=1 SV=1	regulation of biological process;response to stimulus	cytosol;membrane	enzyme regulator activity;metal ion binding	Gmip			1.5547e+06	0	5.78407e+06	1.2195e+06	4.63136e+06	3.78189e+06	4.1979e+06	1.77672e+06	4.15439e+06	4.50357e+06
Q9D903	Probable rRNA-processing protein EBP2 OS=Mus musculus OX=10090 GN=Ebna1bp2 PE=2 SV=1	metabolic process	nucleus	RNA binding	Ebna1bp2			2.8651e+06	2.42739e+06	2.60778e+06	2.39244e+06	3355234	3.95523e+06	2.92452e+06	5.29595e+06	2.44244e+06	4.40536e+06
Q9CR21	Acyl carrier protein, mitochondrial OS=Mus musculus OX=10090 GN=Ndufab1 PE=1 SV=1	cell organization and biogenesis;metabolic process;transport	cytosol;mitochondrion		Ndufab1	Metabolic pathways; Huntington's disease; Non-alcoholic fatty liver disease (NAFLD); Oxidative phosphorylation; Parkinson's disease; Alzheimer's disease	Electron Transport Chain	2.05066e+08	157483839	1.65632e+08	2.35054e+08	2.07245e+08	2.38684e+08	2.0425e+08	212339598	4.18348e+08	2.7885e+08
Q9CRA5	Golgi phosphoprotein 3 OS=Mus musculus OX=10090 GN=Golph3 PE=1 SV=1	cell organization and biogenesis;cell proliferation;cellular component movement;metabolic process;regulation of biological process;transport	cytosol;endosome;Golgi;membrane;mitochondrion	protein binding	Golph3	Transcriptional misregulation in cancer		5.99101e+06	2.68776e+06	2.56122e+06	2.97094e+06	3.45437e+06	4.15764e+06	5.50942e+06	3.22144e+06	5.71164e+06	6.01189e+06
Q8BH04	Phosphoenolpyruvate carboxykinase [GTP], mitochondrial OS=Mus musculus OX=10090 GN=Pck2 PE=1 SV=1	metabolic process;regulation of biological process	mitochondrion	catalytic activity;metal ion binding;nucleotide binding	Pck2	FoxO signaling pathway; PPAR signaling pathway; Pyruvate metabolism; Citrate cycle (TCA cycle); Insulin signaling pathway; Metabolic pathways; Insulin resistance; Glycolysis / Gluconeogenesis; Proximal tubule bicarbonate reclamation; Adipocytokine signaling pathway; PI3K-Akt signaling pathway; AMPK signaling pathway; Glucagon signaling pathway	PPAR signaling pathway; Adipogenesis genes	0	425018	544376	675241	1.24467e+06	664694	1.12032e+06	666125	817431	751877
Q9CY27	Very-long-chain enoyl-CoA reductase OS=Mus musculus OX=10090 GN=Tecr PE=1 SV=1	metabolic process	cytoplasm;endoplasmic reticulum;membrane;nucleus	catalytic activity	Tecr	Fatty acid metabolism; Fatty acid elongation; Biosynthesis of unsaturated fatty acids		3.37357e+06	1.16322e+06	3.40242e+06	1.83702e+06	2.8117e+06	5.07144e+06	2.86113e+06	3.93316e+06	4.32851e+06	1.30522e+06
P62855	40S ribosomal protein S26 OS=Mus musculus OX=10090 GN=Rps26 PE=1 SV=3	metabolic process;regulation of biological process	membrane;ribosome	protein binding;RNA binding;structural molecule activity	Rps26; Rps26-ps1	Ribosome	Cytoplasmic Ribosomal Proteins	8.13461e+06	5.63841e+06	8.47645e+06	3.69724e+06	7.56374e+06	6.33475e+06	9.3469e+06	7.01922e+06	8.30863e+06	1.55233e+07
Q8BUV3	Gephyrin OS=Mus musculus OX=10090 GN=Gphn PE=1 SV=2	cell organization and biogenesis;metabolic process;response to stimulus	cytoplasm;cytoskeleton;membrane	catalytic activity;metal ion binding;nucleotide binding;protein binding;structural molecule activity	Gphn	GABAergic synapse; Metabolic pathways; Folate biosynthesis	Splicing factor NOVA regulated synaptic proteins	1.9249e+06	1.50305e+06	2.36414e+06	2.67779e+06	1.45656e+06	2.36259e+06	4.04059e+06	2.59076e+06	2.00659e+06	2.77241e+06
Q7TMB8	Cytoplasmic FMR1-interacting protein 1 OS=Mus musculus OX=10090 GN=Cyfip1 PE=1 SV=1	cell differentiation;cell growth;cell organization and biogenesis;development;regulation of biological process;response to stimulus	cytoplasm	protein binding;RNA binding	Cyfip1	Regulation of actin cytoskeleton; RNA transport		194128	156044	64512.1	0	266776	151762	186231	178085	223056	206079
Q9CRC0	Vitamin K epoxide reductase complex subunit 1 OS=Mus musculus OX=10090 GN=Vkorc1 PE=1 SV=1	coagulation;metabolic process;regulation of biological process;response to stimulus	endoplasmic reticulum;membrane	catalytic activity	Vkorc1	Ubiquinone and other terpenoid-quinone biosynthesis		2.26969e+07	34821974	3.08744e+07	2.06966e+07	2.74852e+07	3.54818e+07	3.52838e+07	4.15982e+07	3.66671e+07	4.03505e+07
Q6A028	Switch-associated protein 70 OS=Mus musculus OX=10090 GN=Swap70 PE=1 SV=2	cell organization and biogenesis;cellular homeostasis;metabolic process;regulation of biological process	cytoplasm;cytoskeleton;membrane;nucleus	catalytic activity;DNA binding;motor activity;nucleotide binding;protein binding	Swap70			0	972856	0	905488	1.1665e+06	998790	940976	0	1.47244e+06	801045
Q9JLQ2	ARF GTPase-activating protein GIT2 OS=Mus musculus OX=10090 GN=Git2 PE=1 SV=2	regulation of biological process;response to stimulus		enzyme regulator activity;metal ion binding;protein binding	Git2	Endocytosis	Integrin-mediated Cell Adhesion	1.55642e+07	0	0	1.49003e+07	11956691	1.32411e+07	9.71573e+06	1.02026e+07	1.26689e+07	1.28691e+07
P08103	Tyrosine-protein kinase HCK OS=Mus musculus OX=10090 GN=Hck PE=1 SV=4	cell differentiation;cellular component movement;defense response;metabolic process;regulation of biological process;response to stimulus;transport	cytoplasm;cytoskeleton;cytosol;Golgi;membrane;nucleus;vacuole	catalytic activity;nucleotide binding;protein binding	Hck	Chemokine signaling pathway; Fc gamma R-mediated phagocytosis	IL-5 Signaling Pathway; PluriNetWork; Chemokine signaling pathway; Microglia Pathogen Phagocytosis Pathway; IL-3 Signaling Pathway; IL-6 signaling Pathway; Kit Receptor Signaling Pathway; Focal Adhesion	2.66144e+06	4.11617e+06	2.27393e+06	3.31348e+06	3.05062e+06	3.14247e+06	4.6657e+06	3.65395e+06	4.61322e+06	5.21431e+06
P99029	Peroxiredoxin-5, mitochondrial OS=Mus musculus OX=10090 GN=Prdx5 PE=1 SV=2	cell death;cellular homeostasis;metabolic process;regulation of biological process;response to stimulus	cytoplasm;cytosol;mitochondrion;nucleus;organelle lumen	antioxidant activity;catalytic activity;DNA binding;enzyme regulator activity;protein binding	Prdx5	Peroxisome		9.99416e+06	9.90734e+06	1.04979e+07	6.35033e+06	1.43123e+07	1.14986e+07	1.4802e+07	1.41649e+07	1.32771e+07	1.65877e+07
P42645	14-3-3-like protein GF14 upsilon OS=Arabidopsis thaliana OX=3702 GN=GRF5 PE=1 SV=2	response to stimulus	cytoplasm;cytosol;Golgi;membrane;mitochondrion;nucleus	nucleotide binding;protein binding	GRF5			5.0016e+06	6.73633e+06	8.98298e+06	7.19703e+06	6.60628e+06	9.19193e+06	1.06055e+07	9.7569e+06	1.19974e+07	5.98534e+06
Q9EST5	Acidic leucine-rich nuclear phosphoprotein 32 family member B OS=Mus musculus OX=10090 GN=Anp32b PE=1 SV=1	cell organization and biogenesis;metabolic process;regulation of biological process;transport	cytoplasm;nucleus	protein binding	Anp32b			0	1.35992e+07	1.26504e+07	1.51817e+07	11917911	1.34349e+07	1.23631e+07	1.49443e+07	1.55473e+07	1.71303e+07
Q3U1G5	Interferon-stimulated 20 kDa exonuclease-like 2 OS=Mus musculus OX=10090 GN=Isg20l2 PE=1 SV=2	metabolic process	nucleus	catalytic activity;RNA binding	Isg20l2			1.19747e+07	7.25053e+06	8.21261e+06	6.23263e+06	1.47916e+07	1.16597e+07	1.49184e+07	1.45977e+07	1.21106e+07	1.33361e+07
O55234	Proteasome subunit beta type-5 OS=Mus musculus OX=10090 GN=Psmb5 PE=1 SV=3	metabolic process;response to stimulus	cytoplasm;cytosol;nucleus;proteasome	catalytic activity	Psmb5	Proteasome	TNF-alpha NF-kB Signaling Pathway; Proteasome Degradation	0	2.64784e+06	1.6262e+06	1.16193e+06	2.56988e+06	2.42622e+06	2.37075e+06	2.28396e+06	1.90502e+06	1.99887e+06
Q91YT7	YTH domain-containing family protein 2 OS=Mus musculus OX=10090 GN=Ythdf2 PE=1 SV=1	cell organization and biogenesis;regulation of biological process	cytoplasm;cytosol;nucleus	RNA binding	Ythdf2			6.49496e+06	4.83228e+06	2.52455e+06	3.01347e+06	0	7.36361e+06	3.12157e+06	6.81135e+06	5.84301e+06	0
Q8C8U0	Liprin-beta-1 OS=Mus musculus OX=10090 GN=Ppfibp1 PE=1 SV=3	cell organization and biogenesis;cellular component movement;metabolic process;regulation of biological process		catalytic activity;motor activity;protein binding;structural molecule activity	Ppfibp1			3.7011e+06	3.99471e+06	3.07756e+06	5.39453e+06	4.18703e+06	4.37612e+06	4.84836e+06	3.13516e+06	4.60504e+06	1.09331e+07
Q9Z1B5	Mitotic spindle assembly checkpoint protein MAD2A OS=Mus musculus OX=10090 GN=Mad2l1 PE=1 SV=2	cell division;cell organization and biogenesis;regulation of biological process	chromosome;cytoplasm;cytoskeleton;cytosol;nucleus	protein binding	Mad2l1	Progesterone-mediated oocyte maturation; HTLV-I infection; Oocyte meiosis; Cell cycle		2.15033e+07	4.08462e+07	3.40422e+07	4.92501e+06	3.33193e+07	3.88936e+07	4.04456e+07	4.08159e+07	2.94241e+07	3.49325e+07
Q9CR67	Transmembrane protein 33 OS=Mus musculus OX=10090 GN=Tmem33 PE=1 SV=1	cell organization and biogenesis;regulation of biological process;response to stimulus	endoplasmic reticulum;membrane;nucleus	protein binding;structural molecule activity	Tmem33			5.93625e+06	1.0194e+07	7.64299e+06	1.23296e+07	1.03774e+07	1.35775e+07	1.28729e+07	1.08807e+07	1.40478e+07	1.22562e+07
Q91X20	Set1/Ash2 histone methyltransferase complex subunit ASH2 OS=Mus musculus OX=10090 GN=Ash2l PE=1 SV=1	cell organization and biogenesis;metabolic process;regulation of biological process;response to stimulus	nucleus	catalytic activity;DNA binding;metal ion binding;protein binding	Ash2l			2.85151e+06	3.36438e+06	3.52891e+06	0	5.2506e+06	3.66303e+06	6.1894e+06	4.14142e+06	2.95972e+06	3.56968e+06
Q920L1	Acyl-CoA (8-3)-desaturase OS=Mus musculus OX=10090 GN=Fads1 PE=1 SV=1	cell communication;metabolic process;response to stimulus;transport	endoplasmic reticulum;membrane;mitochondrion;nucleus	catalytic activity	Fads1	Fatty acid metabolism; Biosynthesis of unsaturated fatty acids	Selenium Micronutrient Network	7.50821e+06	7.453e+06	7.99253e+06	4.39409e+06	8139584	9.00355e+06	9.86231e+06	1.32659e+07	7.70964e+06	8.71928e+06
Q05D44	Eukaryotic translation initiation factor 5B OS=Mus musculus OX=10090 GN=Eif5b PE=1 SV=2	metabolic process;regulation of biological process	cytoplasm	catalytic activity;metal ion binding;nucleotide binding;RNA binding	Eif5b	RNA transport		0	2.62285e+06	1.82817e+06	3.20127e+06	2.93757e+06	3.1114e+06	3.49905e+06	2.53428e+06	2.92068e+06	2.42162e+06
Q9ESV0	ATP-dependent RNA helicase DDX24 OS=Mus musculus OX=10090 GN=Ddx24 PE=1 SV=2	metabolic process	cytoplasm;membrane	catalytic activity;nucleotide binding;RNA binding	Ddx24		mRNA processing	0	1.31594e+06	1.30206e+06	1.51682e+06	1.27008e+06	1.71364e+06	1.49637e+06	1.4483e+06	1.6992e+06	1.03181e+06
Q8K3J1	NADH dehydrogenase [ubiquinone] iron-sulfur protein 8, mitochondrial OS=Mus musculus OX=10090 GN=Ndufs8 PE=1 SV=1	cell organization and biogenesis;metabolic process;response to stimulus;transport	membrane;mitochondrion	catalytic activity;metal ion binding	Ndufs8	Metabolic pathways; Huntington's disease; Non-alcoholic fatty liver disease (NAFLD); Oxidative phosphorylation; Parkinson's disease; Alzheimer's disease	Oxidative phosphorylation; Electron Transport Chain	3.91263e+06	2.17444e+06	1.57904e+06	2.87188e+06	930434	4.10589e+06	3.68779e+06	3.32677e+06	2.77533e+06	1.77803e+06
Q8K297	Procollagen galactosyltransferase 1 OS=Mus musculus OX=10090 GN=Colgalt1 PE=1 SV=2		endoplasmic reticulum;membrane;organelle lumen	catalytic activity	Glt25d1; Colgalt1	Lysine degradation; Other types of O-glycan biosynthesis		514717	491019	389791	577134	779568	635709	883642	613342	830534	794479
O35598	Disintegrin and metalloproteinase domain-containing protein 10 OS=Mus musculus OX=10090 GN=Adam10 PE=1 SV=2	metabolic process;regulation of biological process;response to stimulus;transport	cell surface;cytoplasm;Golgi;membrane;nucleus	catalytic activity;metal ion binding;protein binding	Adam10	Alzheimer's disease	Hypertrophy Model; Alzheimers Disease; Delta-Notch Signaling Pathway	7.69461e+06	4.25773e+06	5.34309e+06	5.48773e+06	8.88261e+06	8.91728e+06	8.27051e+06	8.895e+06	7.75268e+06	9.35407e+06
Q9Z2I9	Succinate--CoA ligase [ADP-forming] subunit beta, mitochondrial OS=Mus musculus OX=10090 GN=Sucla2 PE=1 SV=2	metabolic process	mitochondrion	catalytic activity;metal ion binding;nucleotide binding	Sucla2	Citrate cycle (TCA cycle); Metabolic pathways; Propanoate metabolism; Carbon metabolism	TCA Cycle	847427	2.99917e+06	2.53615e+06	3.27669e+06	3.59094e+06	2.64373e+06	4.28291e+06	3.69367e+06	3.4866e+06	3.96232e+06
O70492	Sorting nexin-3 OS=Mus musculus OX=10090 GN=Snx3 PE=1 SV=3	cell organization and biogenesis;metabolic process;regulation of biological process;response to stimulus;transport	cytoplasm;cytosol;endosome;membrane	protein binding	Snx3			7.89722e+06	5.21269e+06	8.88225e+06	4.51213e+06	2.83299e+06	6.95134e+06	7.29611e+06	8.40314e+06	8.26e+06	9.06415e+06
Q8R2U0	Nucleoporin SEH1 OS=Mus musculus OX=10090 GN=Seh1l PE=2 SV=1	cell communication;cell division;cell organization and biogenesis;defense response;regulation of biological process;response to stimulus;transport	chromosome;membrane;nucleus;vacuole	protein binding	Seh1l	mTOR signaling pathway; RNA transport		9.12325e+06	9.6868e+06	1.06077e+07	5.59988e+06	12048750	1.28705e+07	1.2013e+07	1.24266e+07	1.21622e+07	1.464e+07
O35345	Importin subunit alpha-7 OS=Mus musculus OX=10090 GN=Kpna6 PE=1 SV=2	regulation of biological process;transport	cytoplasm;cytosol;membrane;nucleus	protein binding;transporter activity	Kpna6		TNF-alpha NF-kB Signaling Pathway	847734	982663	987537	816599	987430	554310	2.96681e+06	818326	1.01877e+06	933781
Q7TQK1	Integrator complex subunit 7 OS=Mus musculus OX=10090 GN=Ints7 PE=1 SV=1	metabolic process;response to stimulus	chromosome;cytoplasm;cytosol;nucleus		Ints7			2.76452e+06	5.16733e+06	2.30671e+06	1.29503e+06	2.17215e+06	3.81535e+06	1.76994e+06	5.03867e+06	4.7708e+06	3.24886e+06
P63328	Serine/threonine-protein phosphatase 2B catalytic subunit alpha isoform OS=Mus musculus OX=10090 GN=Ppp3ca PE=1 SV=1	cellular homeostasis;metabolic process;regulation of biological process;response to stimulus;transport	cytosol;membrane;mitochondrion;nucleus	catalytic activity;metal ion binding;protein binding	Ppp3ca	Oxytocin signaling pathway; Wnt signaling pathway; T cell receptor signaling pathway; MAPK signaling pathway; Dopaminergic synapse; Amyotrophic lateral sclerosis (ALS); VEGF signaling pathway; Long-term potentiation; Amphetamine addiction; Tuberculosis; Axon guidance; HTLV-I infection; Oocyte meiosis; Osteoclast differentiation; B cell receptor signaling pathway; Glutamatergic synapse; cGMP-PKG s…	Mitochondrial Gene Expression; MicroRNAs in Cardiomyocyte Hypertrophy; Alzheimers Disease; Serotonin and anxiety; G Protein Signaling Pathways; Spinal Cord Injury; MAPK signaling pathway	1.08621e+07	1.53339e+07	1.07543e+07	1.18585e+07	1.59583e+07	2.25904e+07	1.45046e+07	1.71472e+07	1.3205e+07	2.05191e+07
O55106	Striatin OS=Mus musculus OX=10090 GN=Strn PE=1 SV=2	cell organization and biogenesis;regulation of biological process;response to stimulus	cytoplasm;membrane	protein binding	Strn			6.96391e+06	4.54481e+06	1.05676e+07	5.89024e+06	1.03492e+07	1.14631e+07	1.10021e+07	8.53114e+06	1.09326e+07	1.00929e+07
P63073	Eukaryotic translation initiation factor 4E OS=Mus musculus OX=10090 GN=Eif4e PE=1 SV=1	defense response;metabolic process;regulation of biological process;response to stimulus	cytoplasm;cytosol	protein binding;RNA binding	Eif4e	mTOR signaling pathway; Insulin signaling pathway; Longevity regulating pathway; HIF-1 signaling pathway; PI3K-Akt signaling pathway; EGFR tyrosine kinase inhibitor resistance; RNA transport	Hypertrophy Model; Focal Adhesion-PI3K-Akt-mTOR-signaling pathway; Translation Factors; mRNA processing; IL-6 signaling Pathway; IL-2 Signaling Pathway; Alpha6-Beta4 Integrin Signaling Pathway; Insulin Signaling	2.54123e+06	2.32052e+06	5.86802e+06	3.47472e+06	4.85377e+06	5.82812e+06	6.0743e+06	5.93076e+06	2.93923e+06	5.0802e+06
Q6PHZ2	Calcium/calmodulin-dependent protein kinase type II subunit delta OS=Mus musculus OX=10090 GN=Camk2d PE=1 SV=1	cell differentiation;cell growth;cell organization and biogenesis;cellular component movement;cellular homeostasis;metabolic process;regulation of biological process;response to stimulus;transport	cytoplasm;cytosol;endoplasmic reticulum;membrane;nucleus	catalytic activity;nucleotide binding;protein binding	Camk2d	Oxytocin signaling pathway; ErbB signaling pathway; Wnt signaling pathway; Cholinergic synapse; Dopaminergic synapse; Long-term potentiation; Amphetamine addiction; Tuberculosis; Melanogenesis; Axon guidance; Oocyte meiosis; Proteoglycans in cancer; Neurotrophin signaling pathway; HIF-1 signaling pathway; Calcium signaling pathway; cAMP signaling pathway; Aldosterone synthesis and secretion; GnRH…	MicroRNAs in Cardiomyocyte Hypertrophy; Myometrial Relaxation and Contraction Pathways; Wnt Signaling Pathway NetPath; Calcium Regulation in the Cardiac Cell	4.52895e+06	4.60215e+06	4.35912e+06	3.3758e+06	3.48544e+06	4.46062e+06	4.72233e+06	6.60389e+06	6.29939e+06	5.51416e+06
Q06609	DNA repair protein RAD51 homolog 1 OS=Homo sapiens OX=9606 GN=RAD51 PE=1 SV=1	cell organization and biogenesis;metabolic process;regulation of biological process;response to stimulus	chromosome;cytoplasm;cytoskeleton;cytosol;mitochondrion;nucleus;organelle lumen	catalytic activity;DNA binding;nucleotide binding;protein binding	RAD51	Pancreatic cancer; Homologous recombination; Fanconi anemia pathway; Pathways in cancer	miRNA Regulation of DNA Damage Response; Homologous recombination; ATM Signaling Pathway; Rac1/Pak1/p38/MMP-2 pathway; DNA Damage Response	8.06557e+06	6.29365e+06	6.31551e+06	6.89731e+06	6954195	5.79998e+06	7.31047e+06	1.14744e+07	8.09778e+06	1.41144e+07
Q9EQ61	Pescadillo homolog OS=Mus musculus OX=10090 GN=Pes1 PE=1 SV=1	cell organization and biogenesis;cell proliferation;metabolic process;regulation of biological process	chromosome;cytosol;membrane;nucleus	protein binding;RNA binding	Pes1			0	837391	856688	0	1.17927e+06	1.02078e+06	1.10546e+06	786207	0	976184
Q9EQ32	Phosphoinositide 3-kinase adapter protein 1 OS=Mus musculus OX=10090 GN=Pik3ap1 PE=1 SV=1	regulation of biological process;response to stimulus	cytoplasm;cytosol;membrane;nucleus	protein binding	Pik3ap1	B cell receptor signaling pathway; PI3K-Akt signaling pathway		4.12893e+06	6.96886e+06	5.84952e+06	6.54209e+06	7.07554e+06	5.30223e+06	8.71613e+06	9.47933e+06	8.53495e+06	9.32969e+06
Q924T2	28S ribosomal protein S2, mitochondrial OS=Mus musculus OX=10090 GN=Mrps2 PE=1 SV=1	cell organization and biogenesis;metabolic process	mitochondrion;ribosome	structural molecule activity	Mrps2	Ribosome		1.21045e+07	1.12958e+07	1.06493e+07	9.63755e+06	1.39833e+07	2.04639e+07	1.10551e+07	1.90839e+07	1.65932e+07	1.08356e+07
Q9JJI8	60S ribosomal protein L38 OS=Mus musculus OX=10090 GN=Rpl38 PE=1 SV=3	cell organization and biogenesis;metabolic process;regulation of biological process	ribosome	RNA binding;structural molecule activity	Rpl38; Rpl38-ps1; Rpl38-ps2	Ribosome	Cytoplasmic Ribosomal Proteins; mRNA processing	3.75065e+06	7.20232e+06	7.6618e+06	3.12121e+06	6.39052e+06	7.45695e+06	8.50113e+06	6.8146e+06	8.09792e+06	7.16585e+06
Q8BWN8	Peroxisomal succinyl-coenzyme A thioesterase OS=Mus musculus OX=10090 GN=Acot4 PE=1 SV=1	metabolic process		catalytic activity;protein binding	Acot4	Metabolic pathways; Fatty acid elongation; Biosynthesis of unsaturated fatty acids		1.36543e+07	5.55046e+06	5.67659e+06	6.80153e+06	8403340	1.0937e+07	8.86843e+06	8.52913e+06	1.41498e+07	1.17094e+07
Q9R049	E3 ubiquitin-protein ligase AMFR OS=Mus musculus OX=10090 GN=Amfr PE=1 SV=2	cell organization and biogenesis;metabolic process;regulation of biological process;response to stimulus	cytoplasm;endoplasmic reticulum;Golgi;membrane;nucleus	catalytic activity;metal ion binding;nucleotide binding;protein binding;receptor activity	Amfr	Protein processing in endoplasmic reticulum		1.19954e+07	1.2413e+07	1.19545e+07	7.39136e+06	15099311	1.81922e+07	1.69421e+07	1.72699e+07	1.54194e+07	1.16334e+07
Q61249	Immunoglobulin-binding protein 1 OS=Mus musculus OX=10090 GN=Igbp1 PE=1 SV=1	regulation of biological process;response to stimulus	cytoplasm;cytosol	enzyme regulator activity;protein binding	Igbp1			4.78661e+06	1.95085e+06	2.85943e+06	2.13897e+06	683183	3.47167e+06	3.27432e+06	3.94814e+06	4.57197e+06	1.48751e+06
Q3UHD6	Sorting nexin-27 OS=Mus musculus OX=10090 GN=Snx27 PE=1 SV=2	regulation of biological process;response to stimulus;transport	cytoplasm;cytosol;endosome;membrane	protein binding	Snx27			1.75043e+06	3.08035e+06	2.26446e+06	0	1.78375e+06	2.17147e+06	2.85167e+06	2.13209e+06	2.35109e+06	2.46303e+06
P99026	Proteasome subunit beta type-4 OS=Mus musculus OX=10090 GN=Psmb4 PE=1 SV=1	metabolic process;regulation of biological process	cytoplasm;cytosol;nucleus;proteasome	catalytic activity	Psmb4	Proteasome	Proteasome Degradation	871913	1.49973e+06	2.0237e+06	0	1.08211e+06	0	1.97879e+06	2.29259e+06	1.52944e+06	1.56886e+06
Q9WV85	Nucleoside diphosphate kinase 3 OS=Mus musculus OX=10090 GN=Nme3 PE=1 SV=3	metabolic process;regulation of biological process	mitochondrion	catalytic activity;metal ion binding;nucleotide binding	Nme3	Metabolic pathways; Purine metabolism; Pyrimidine metabolism	Purine metabolism	2.73241e+07	3.11329e+07	2.21223e+07	2.17228e+07	2.09608e+07	5.45242e+07	2.30042e+07	2.73359e+07	2.71385e+07	3.37924e+07
Q922Q2	Serine/threonine-protein kinase RIO1 OS=Mus musculus OX=10090 GN=Riok1 PE=1 SV=2	metabolic process;regulation of biological process	cytoplasm;membrane	catalytic activity;metal ion binding;nucleotide binding;transporter activity	Riok1	Ribosome biogenesis in eukaryotes		1.13744e+07	8.16013e+06	8.64065e+06	7.29537e+06	7.9545e+06	1.64815e+07	1.14159e+07	1.38851e+07	8.47805e+06	8.14202e+06
Q8BU14	Translocation protein SEC62 OS=Mus musculus OX=10090 GN=Sec62 PE=1 SV=1	cell organization and biogenesis;transport	endoplasmic reticulum;membrane	transporter activity	Sec62	Protein export; Protein processing in endoplasmic reticulum		3.00253e+07	3.11837e+07	3.33912e+07	1.84725e+07	3.56049e+07	4.75176e+07	3.59961e+07	4.45555e+07	3.57958e+07	3.57802e+07
P24527	Leukotriene A-4 hydrolase OS=Mus musculus OX=10090 GN=Lta4h PE=1 SV=4	metabolic process	cytoplasm;cytosol;nucleus	catalytic activity;metal ion binding;protein binding;RNA binding	Lta4h	Metabolic pathways; Arachidonic acid metabolism	Eicosanoid Synthesis	0	1.27119e+06	917897	1.09446e+06	800124	723649	1.12833e+06	1.15234e+06	1.5615e+06	916131
Q62086	Serum paraoxonase/arylesterase 2 OS=Mus musculus OX=10090 GN=Pon2 PE=1 SV=2	metabolic process;response to stimulus	extracellular;membrane;mitochondrion;nucleus;vacuole	catalytic activity;metal ion binding;protein binding	Pon2	Metabolic pathways		3.21566e+07	3.15599e+07	4.45729e+07	2.02811e+07	4.75667e+07	3.40025e+07	6.03196e+07	4.93929e+07	4.33504e+07	4.91459e+07
Q9CPV4	Glyoxalase domain-containing protein 4 OS=Mus musculus OX=10090 GN=Glod4 PE=1 SV=1		mitochondrion	protein binding	Glod4			1.16675e+06	1.19269e+06	2.2956e+06	3.51379e+06	3.00767e+06	2.39049e+06	3.49825e+06	2.46853e+06	3.12489e+06	3.49735e+06
Q80VD1	Protein FAM98B OS=Mus musculus OX=10090 GN=Fam98b PE=1 SV=1	metabolic process;regulation of biological process	cytoplasm;nucleus	catalytic activity;protein binding;RNA binding	Fam98b			0	2.77225e+06	5.18245e+06	5.74458e+06	2.18563e+06	2.53271e+06	5.36552e+06	4.72357e+06	5.78581e+06	2.88203e+06
Q91YJ2	Sorting nexin-4 OS=Mus musculus OX=10090 GN=Snx4 PE=1 SV=1	cell organization and biogenesis;transport	cytoplasm;endosome;membrane	protein binding	Snx4	Endocytosis		6.45498e+06	6.17753e+06	5.93028e+06	0	6.49327e+06	6.04998e+06	6.43625e+06	4.98051e+06	6.61588e+06	9.49791e+06
Q99LI8	Hepatocyte growth factor-regulated tyrosine kinase substrate OS=Mus musculus OX=10090 GN=Hgs PE=1 SV=2	cell organization and biogenesis;regulation of biological process;transport	cytoplasm;cytosol;endosome;membrane;vacuole	metal ion binding;protein binding	Hgs	Endocytosis; Phagosome		8.89017e+06	1.00152e+07	1.49665e+07	1.15514e+07	1.47296e+07	1.58377e+07	1.89636e+07	2.01138e+07	1.33718e+07	1.23245e+07
Q9ES97	Reticulon-3 OS=Mus musculus OX=10090 GN=Rtn3 PE=1 SV=2	cell death;cell organization and biogenesis;transport	endoplasmic reticulum;Golgi;membrane	protein binding	Rtn3	Alzheimer's disease		1.32786e+07	1.38272e+07	1.4269e+07	5.41132e+06	1.4598e+07	1.44663e+07	1.37512e+07	1.44802e+07	2.14726e+07	1.80621e+07
Q3UGY8	Brefeldin A-inhibited guanine nucleotide-exchange protein 3 OS=Mus musculus OX=10090 GN=Arfgef3 PE=1 SV=1	regulation of biological process	membrane		D10Bwg1379e; Arfgef3			1.87954e+07	1.75538e+07	1.98621e+07	1.11518e+07	2.47122e+07	2.86222e+07	2.72544e+07	2.24162e+07	2.17368e+07	2.32599e+07
O70469	Docking protein 2 OS=Mus musculus OX=10090 GN=Dok2 PE=1 SV=1	metabolic process;regulation of biological process;response to stimulus		protein binding;signal transducer activity	Dok2		EGFR1 Signaling Pathway	2.77567e+07	1.7664e+07	2.27728e+07	2.42729e+07	2.24916e+07	3.08852e+07	2.19724e+07	2.78e+07	4.82346e+07	2.49841e+07
Q61550	Double-strand-break repair protein rad21 homolog OS=Mus musculus OX=10090 GN=Rad21 PE=1 SV=3	cell death;cell division;cell organization and biogenesis;metabolic process;regulation of biological process;response to stimulus	chromosome;membrane;nucleus	protein binding	Rad21	Cell cycle	mRNA processing	226330	0	0	0	113610	0	97597.2	115884	0	241278
Q8BWZ3	N-alpha-acetyltransferase 25, NatB auxiliary subunit OS=Mus musculus OX=10090 GN=Naa25 PE=1 SV=1	metabolic process	cytoplasm;cytosol;Golgi	catalytic activity;protein binding	Naa25			566855	627867	574687	802651	949986	1.00157e+06	1.00339e+06	782324	968397	953775
Q28677	Solute carrier family 12 member 4 OS=Oryctolagus cuniculus OX=9986 GN=SLC12A4 PE=1 SV=1	transport	membrane	transporter activity	RBKCC1; SLC12A4			5.66547e+07	4.93264e+07	5.02558e+07	5.48658e+07	4.97214e+07	8.43446e+07	7.53817e+07	6.4247e+07	6.13409e+07	6.34305e+07
P62317	Small nuclear ribonucleoprotein Sm D2 OS=Mus musculus OX=10090 GN=Snrpd2 PE=1 SV=1	cell organization and biogenesis;metabolic process	cytoplasm;cytosol;nucleus;spliceosomal complex	RNA binding	Snrpd2	Spliceosome	mRNA processing; EGFR1 Signaling Pathway	1.31501e+07	8.25447e+06	1.49508e+07	1.53864e+07	1.45554e+07	1.65429e+07	2.23004e+07	1.86361e+07	1.85319e+07	1.25795e+07
Q9D1C9	Ribosomal RNA-processing protein 7 homolog A OS=Mus musculus OX=10090 GN=Rrp7a PE=2 SV=1	cell organization and biogenesis;metabolic process	cytoplasm	RNA binding	Rrp7a	Ribosome biogenesis in eukaryotes		4.14775e+06	1.26603e+06	3.83193e+06	1.31795e+06	4.45168e+06	6.30513e+06	4.21061e+06	3.71587e+06	1.67325e+06	4.15756e+06
Q60866	Phosphotriesterase-related protein OS=Mus musculus OX=10090 GN=Pter PE=1 SV=1	cell differentiation;metabolic process		catalytic activity;metal ion binding	Pter			1.17424e+07	1.54076e+07	1.63128e+07	9.6673e+06	1.92263e+07	1.55429e+07	2.31106e+07	1.9688e+07	2.13803e+07	1.67781e+07
Q3U821	WD repeat-containing protein 75 OS=Mus musculus OX=10090 GN=Wdr75 PE=1 SV=1	metabolic process;regulation of biological process	nucleus	protein binding;RNA binding	Wdr75	Ribosome biogenesis in eukaryotes		1.33311e+06	1.0028e+06	0	1.71255e+06	972441	0	1.43975e+06	0	2.30156e+06	2.95482e+06
P01902	H-2 class I histocompatibility antigen, K-D alpha chain OS=Mus musculus OX=10090 GN=H2-K1 PE=1 SV=1	cell differentiation;defense response;metabolic process;regulation of biological process;response to stimulus;transport	cell surface;cytosol;endoplasmic reticulum;extracellular;Golgi;membrane	protein binding;RNA binding	H2-K1; LOC101056305			1.23458e+06	8.70643e+06	9.42842e+06	1.02719e+07	1.03608e+07	1.25053e+07	1.24423e+07	1.22572e+07	1.28074e+07	3.331e+06
Q8CEC0	Nuclear pore complex protein Nup88 OS=Mus musculus OX=10090 GN=Nup88 PE=1 SV=1	transport	nucleus	protein binding;transporter activity	Nup88	RNA transport		1.79284e+06	3.21213e+06	2.67144e+06	3.98598e+06	3.157e+06	1.23454e+06	5.95362e+06	4.94874e+06	1.14178e+06	6.48251e+06
Q91WU5	Arsenite methyltransferase OS=Mus musculus OX=10090 GN=As3mt PE=1 SV=2	metabolic process;response to stimulus	cytoplasm;cytosol;mitochondrion	catalytic activity	As3mt			8.96458e+06	9.81301e+06	7.02034e+06	9.21791e+06	1.01145e+07	1.33824e+07	1.16082e+07	1.00116e+07	1.04332e+07	1.47079e+07
Q91WJ8	Far upstream element-binding protein 1 OS=Mus musculus OX=10090 GN=Fubp1 PE=1 SV=1	cell division;cell growth;cell proliferation;metabolic process;regulation of biological process	nucleus	DNA binding;protein binding;RNA binding	Fubp1			1.95738e+06	0	515454	2.7449e+06	1.58449e+06	1.59568e+06	1.94413e+06	1.97214e+06	1.99416e+06	1.54759e+06
Q80TM9	Nischarin OS=Mus musculus OX=10090 GN=Nisch PE=1 SV=2	cell death;cell organization and biogenesis;metabolic process;regulation of biological process;response to stimulus;transport	cytoplasm;cytosol;endosome;membrane	protein binding	Nisch		Hypothetical Network for Drug Addiction	6.33811e+06	6.77387e+06	7.47613e+06	5.41935e+06	9252512	7.51373e+06	8.98023e+06	1.04036e+07	9.95699e+06	1.00369e+07
Q8K202	DNA-directed RNA polymerase I subunit RPA49 OS=Mus musculus OX=10090 GN=Polr1e PE=1 SV=2	cell organization and biogenesis;metabolic process;regulation of biological process	nucleus	catalytic activity;DNA binding;protein binding	Polr1e	RNA polymerase; Metabolic pathways; Purine metabolism; Pyrimidine metabolism	Purine metabolism; TNF-alpha NF-kB Signaling Pathway	5.58097e+06	6.9538e+06	5.26883e+06	6.63341e+06	6.80759e+06	7.50659e+06	8.25296e+06	9.60239e+06	8.35564e+06	7.8193e+06
Q8BM55	Transmembrane protein 214 OS=Mus musculus OX=10090 GN=Tmem214 PE=1 SV=1	cell death	cytosol;endoplasmic reticulum;Golgi;membrane		Tmem214			1.76466e+06	2.37042e+06	2.45802e+06	1.50906e+06	2.48718e+06	2.55824e+06	3.20921e+06	2.30441e+06	2.67686e+06	3.31624e+06
Q9JK30	Origin recognition complex subunit 3 OS=Mus musculus OX=10090 GN=Orc3 PE=1 SV=1	cell organization and biogenesis;cell proliferation;metabolic process	nucleus	DNA binding	Orc3	Cell cycle	DNA Replication; G1 to S cell cycle control	2.34118e+07	1.87691e+07	1.25403e+07	1.28208e+07	2.20124e+07	2.80256e+07	2.17233e+07	2.02608e+07	1.83198e+07	3.06007e+07
Q9JK38	Glucosamine 6-phosphate N-acetyltransferase OS=Mus musculus OX=10090 GN=Gnpnat1 PE=1 SV=1	metabolic process	endosome;Golgi;membrane	catalytic activity;protein binding	Gnpnat1	Amino sugar and nucleotide sugar metabolism		9.10552e+06	1.02776e+07	1.41656e+07	1.32454e+07	1.76325e+07	1.22156e+07	2.16266e+07	1.96209e+07	1.59492e+07	1.60789e+07
P18572	Basigin OS=Mus musculus OX=10090 GN=Bsg PE=1 SV=2	cell organization and biogenesis;response to stimulus	membrane;mitochondrion	protein binding	Bsg		Matrix Metalloproteinases	5.35763e+07	4.395e+07	2.45515e+07	9.99137e+06	61428584	4.93498e+07	6.79463e+07	4.55418e+07	4.13409e+07	5.24452e+07
Q3ULJ0	Glycerol-3-phosphate dehydrogenase 1-like protein OS=Mus musculus OX=10090 GN=Gpd1l PE=1 SV=2	metabolic process;regulation of biological process	cytoplasm;membrane	catalytic activity;nucleotide binding;protein binding	Gpd1l	Glycerophospholipid metabolism		2.47364e+06	2.56529e+06	2.55684e+06	2.43324e+06	2.87414e+06	3.59768e+06	3.09977e+06	3.18592e+06	3.2228e+06	3.98917e+06
Q8JZV7	N-acetylglucosamine-6-phosphate deacetylase OS=Mus musculus OX=10090 GN=Amdhd2 PE=1 SV=1	metabolic process	nucleus	catalytic activity;metal ion binding	Amdhd2	Amino sugar and nucleotide sugar metabolism		1.11719e+07	9.79732e+06	1.11546e+07	4.40176e+06	1.18246e+07	7.96717e+06	1.14016e+07	1.81218e+07	1.85392e+07	7.98928e+06
P47955	60S acidic ribosomal protein P1 OS=Mus musculus OX=10090 GN=Rplp1 PE=1 SV=1	metabolic process;regulation of biological process	ribosome	enzyme regulator activity;structural molecule activity	Rplp1	Ribosome	Cytoplasmic Ribosomal Proteins	5.07947e+06	6.15686e+06	5.50415e+06	825325	5.50524e+06	7.35874e+06	5.93255e+06	5.93415e+06	5.67077e+06	5.63255e+06
Q8BGR2	Volume-regulated anion channel subunit LRRC8D OS=Mus musculus OX=10090 GN=Lrrc8d PE=1 SV=1	regulation of biological process;response to stimulus;transport	cytoplasm;endoplasmic reticulum;membrane	protein binding;transporter activity	Lrrc8d			2.62263e+08	2.635e+08	2.71199e+08	1.78895e+08	285008784	2.80881e+08	3.6554e+08	2.50299e+08	3.34741e+08	4.36358e+08
P06214	Delta-aminolevulinic acid dehydratase OS=Rattus norvegicus OX=10116 GN=Alad PE=1 SV=1	cell organization and biogenesis;metabolic process;regulation of biological process;response to stimulus	cytosol;nucleus	catalytic activity;metal ion binding;protein binding	Alad	Porphyrin and chlorophyll metabolism; Metabolic pathways	Heme Biosynthesis	1.96686e+06	0	2.13367e+06	2.05482e+06	2141641	0	3.30255e+06	3.03124e+06	2.50329e+06	2.13692e+06
P28867	Protein kinase C delta type OS=Mus musculus OX=10090 GN=Prkcd PE=1 SV=3	cell death;cell organization and biogenesis;cell proliferation;cellular component movement;defense response;metabolic process;regulation of biological process;response to stimulus;transport	cytoplasm;cytosol;endoplasmic reticulum;membrane;mitochondrion;nucleus	catalytic activity;enzyme regulator activity;metal ion binding;nucleotide binding;protein binding	Prkcd	AGE-RAGE signaling pathway in diabetic complications; Type II diabetes mellitus; NOD-like receptor signaling pathway; Chemokine signaling pathway; Insulin resistance; Fc gamma R-mediated phagocytosis; Neurotrophin signaling pathway; Vascular smooth muscle contraction; GnRH signaling pathway; Tight junction; Estrogen signaling pathway; Inflammatory mediator regulation of TRP channels	Type II interferon signaling (IFNG); IL-5 Signaling Pathway; Chemokine signaling pathway; G Protein Signaling Pathways; Myometrial Relaxation and Contraction Pathways; IL-6 signaling Pathway; Wnt Signaling Pathway; Alpha6-Beta4 Integrin Signaling Pathway; MAPK signaling pathway; Calcium Regulation in the Cardiac Cell; Insulin Signaling; Wnt Signaling Pathway and Pluripotency	1.60088e+06	1.40796e+06	0	1.81483e+06	1.03291e+06	1.25882e+06	1.39535e+06	1.44403e+06	1.99114e+06	1.65023e+06
P21107	Tropomyosin alpha-3 chain OS=Mus musculus OX=10090 GN=Tpm3 PE=1 SV=3	cell organization and biogenesis	cytoplasm;cytoskeleton;cytosol	protein binding;structural molecule activity	Tpm3	Hypertrophic cardiomyopathy (HCM); Dilated cardiomyopathy; Pathways in cancer; Cardiac muscle contraction; Thyroid cancer; Adrenergic signaling in cardiomyocytes	Striated Muscle Contraction	3.28872e+06	3.47266e+06	3.98862e+06	2.65495e+06	1.01352e+06	4.21517e+06	3.94908e+06	2.94296e+06	4.27921e+06	3.65315e+06
P03393	Glycoprotein 55 OS=Friend spleen focus-forming virus (isolate 502) OX=355329 GN=env PE=1 SV=1	cell organization and biogenesis	membrane	structural molecule activity	SFFVgp4			1.74544e+07	2.00075e+07	2.04437e+07	7.68415e+06	2.16658e+07	2.07472e+07	3.00772e+07	1.59533e+07	2.28757e+07	2.54629e+07
Q8C2E7	WASH complex subunit 5 OS=Mus musculus OX=10090 GN=Washc5 PE=1 SV=2	cell organization and biogenesis;transport	cytoplasm;cytosol;endoplasmic reticulum;endosome		E430025E21Rik; Washc5	Endocytosis		3.05566e+06	4.09184e+06	4.69684e+06	3.65248e+06	5.42869e+06	4.07179e+06	6.59043e+06	5.42174e+06	5.70562e+06	5.79375e+06
Q8K4I3	Rho guanine nucleotide exchange factor 6 OS=Mus musculus OX=10090 GN=Arhgef6 PE=1 SV=1	cell organization and biogenesis;regulation of biological process;response to stimulus		protein binding	Arhgef6	Regulation of actin cytoskeleton; Pancreatic cancer	Regulation of Actin Cytoskeleton	140647	3.86139e+06	3.82387e+06	1.70363e+06	3.53879e+06	4.00085e+06	3.87724e+06	3.59116e+06	3.12764e+06	2.62797e+06
B1ARD6	Schlafen family member 9 OS=Mus musculus OX=10090 GN=Slfn9 PE=2 SV=1		nucleus	catalytic activity;DNA binding;nucleotide binding	Slfn9			1.7063e+07	1.66534e+07	1.79644e+07	1.68412e+07	2.48204e+07	3.01812e+07	2.24807e+07	2.3622e+07	2.39222e+07	2.2732e+07
Q8BJ90	Zinc finger protein 771 OS=Mus musculus OX=10090 GN=Znf771 PE=2 SV=1	metabolic process;regulation of biological process	nucleus	DNA binding;metal ion binding	Zfp771			2.56978e+07	2.64699e+07	4.46933e+07	3.04186e+07	3.62408e+07	2.79949e+07	4.21104e+07	5.32816e+07	5.30873e+07	3.88195e+07
Q3UFY8	tRNA methyltransferase 10 homolog C OS=Mus musculus OX=10090 GN=Trmt10c PE=1 SV=2	cell organization and biogenesis;metabolic process;regulation of biological process	mitochondrion	catalytic activity;RNA binding	Trmt10c			1.17673e+07	7.23664e+06	3.1154e+06	4.82062e+06	5417145	6.48313e+06	8.8064e+06	7.91227e+06	6.62656e+06	1.27732e+07
Q8C9B9	Death-inducer obliterator 1 OS=Mus musculus OX=10090 GN=Dido1 PE=1 SV=4	cell death;metabolic process;regulation of biological process;response to stimulus	cytoplasm;cytoskeleton;nucleus	metal ion binding;protein binding;RNA binding	Dido1			1.23157e+06	1.03509e+06	937485	0	1.2777e+06	856026	1.33888e+06	1.32458e+06	1.39141e+06	989826
P61804	Dolichyl-diphosphooligosaccharide--protein glycosyltransferase subunit DAD1 OS=Mus musculus OX=10090 GN=Dad1 PE=1 SV=3	cell death;metabolic process;regulation of biological process;response to stimulus	endoplasmic reticulum;membrane	catalytic activity	Dad1	Metabolic pathways; N-Glycan biosynthesis; Protein processing in endoplasmic reticulum		2.96375e+07	2.67233e+07	3.58804e+07	2.87425e+07	22181728	3.94148e+07	3.95851e+07	3.66952e+07	3.4526e+07	3.80807e+07
O08573	Galectin-9 OS=Mus musculus OX=10090 GN=Lgals9 PE=1 SV=1	regulation of biological process;response to stimulus	cytoplasm;cytosol;extracellular;nucleus	enzyme regulator activity;protein binding	Lgals9			7.44536e+06	1.17553e+07	1.41593e+07	1.31534e+07	1.34713e+07	1.24733e+07	1.64929e+07	1.77135e+07	13542731	1.86635e+07
Q9R1P4	Proteasome subunit alpha type-1 OS=Mus musculus OX=10090 GN=Psma1 PE=1 SV=1	metabolic process;regulation of biological process	cytoplasm;cytosol;nucleus;proteasome	catalytic activity;protein binding	Psma1	Proteasome	Proteasome Degradation	0	2.57751e+06	2.40774e+06	2.15838e+06	3.38388e+06	3.41258e+06	3.34708e+06	3.62608e+06	3.45191e+06	0
O35892	Nuclear autoantigen Sp-100 OS=Mus musculus OX=10090 GN=Sp100 PE=1 SV=2	cell organization and biogenesis;metabolic process;regulation of biological process	cytoplasm;nucleus	DNA binding;protein binding	Sp100	Herpes simplex infection; Viral carcinogenesis		2.08127e+06	2.33119e+06	1.46774e+06	3.47556e+06	1.87201e+06	3.93216e+06	1.94662e+06	2.6188e+06	3.6475e+06	2.60597e+06
Q7TMW6	Cytosolic iron-sulfur assembly component 3 OS=Mus musculus OX=10090 GN=Ciao3 PE=1 SV=2	cell differentiation;cell organization and biogenesis;metabolic process;regulation of biological process;response to stimulus		catalytic activity;metal ion binding	Narfl			1.9713e+07	2.48261e+07	2.39949e+07	6.84869e+06	2.4603e+07	2.97864e+07	2.87018e+07	1.90325e+07	2.47616e+07	2.90355e+07
Q60780	Growth arrest-specific protein 7 OS=Mus musculus OX=10090 GN=Gas7 PE=1 SV=1	cell differentiation;cell organization and biogenesis;development;regulation of biological process	cytoplasm	protein binding	Gas7			1.40465e+07	5.64915e+06	1.32122e+07	1.13468e+07	8.45691e+06	9.46e+06	1.80898e+07	7.97331e+06	1.53924e+07	1.82938e+07
P00374	Dihydrofolate reductase OS=Homo sapiens OX=9606 GN=DHFR PE=1 SV=2	cell organization and biogenesis;metabolic process;regulation of biological process;response to stimulus	cytoplasm;cytosol;mitochondrion	catalytic activity;nucleotide binding;protein binding;RNA binding;translation regulator activity	DHFR; DHFRP1	Folate biosynthesis; Antifolate resistance; One carbon pool by folate; Metabolic pathways	Fluoropyrimidine Activity; Folate Metabolism; One Carbon Metabolism; Retinoblastoma (RB) in Cancer; Trans-sulfuration and one carbon metabolism; Nucleotide Metabolism	2.94733e+07	20735062	2.71376e+07	2.05958e+07	3.10867e+07	3.29685e+07	2.94961e+07	4.16223e+07	3.34665e+07	3.17697e+07
Q569Z6	Thyroid hormone receptor-associated protein 3 OS=Mus musculus OX=10090 GN=Thrap3 PE=1 SV=1	metabolic process;regulation of biological process;response to stimulus	nucleus	DNA binding;nucleotide binding;protein binding;receptor activity;RNA binding	Thrap3			2.43842e+06	0	2.26913e+06	0	0	0	1.72543e+06	1.49992e+06	1.31797e+06	1.62929e+06
Q8K0C4	Lanosterol 14-alpha demethylase OS=Mus musculus OX=10090 GN=Cyp51a1 PE=1 SV=1	metabolic process	endoplasmic reticulum;membrane	catalytic activity;metal ion binding	Cyp51	Steroid biosynthesis; Metabolic pathways	Cholesterol Biosynthesis; Metapathway biotransformation; Oxidation by Cytochrome P450	2.97657e+06	2.35942e+06	1.36612e+06	740559	808382	2.13002e+06	2.89671e+06	2.38935e+06	844166	2.55688e+06
Q9R0I7	YLP motif-containing protein 1 OS=Mus musculus OX=10090 GN=Ylpm1 PE=2 SV=2	metabolic process;regulation of biological process	cytosol;nucleus	RNA binding	Ylpm1			6.61998e+06	8.61359e+06	6.96436e+06	1.08196e+07	6.63867e+06	1.15442e+07	9.44672e+06	8.08823e+06	1.31843e+07	9.68852e+06
Q3URQ0	Testis-expressed protein 10 OS=Mus musculus OX=10090 GN=Tex10 PE=1 SV=1		cytoplasm;membrane;nucleus		Tex10			1.76074e+07	9.86651e+06	1.06013e+07	1.05373e+07	2.26508e+07	2.17989e+07	1.4671e+07	1.53956e+07	1.90034e+07	2.24883e+07
Q9CQL4	39S ribosomal protein L20, mitochondrial OS=Mus musculus OX=10090 GN=Mrpl20 PE=1 SV=1	cell organization and biogenesis;metabolic process	mitochondrion;ribosome	RNA binding;structural molecule activity	Mrpl20	Ribosome		2.08287e+07	1.62283e+07	1.80387e+07	8.08564e+06	2.23895e+07	1.77019e+07	2.55665e+07	1.97746e+07	1.97441e+07	2.9272e+07
Q9QXE7	F-box-like/WD repeat-containing protein TBL1X OS=Mus musculus OX=10090 GN=Tbl1x PE=1 SV=2	cell differentiation;cell organization and biogenesis;metabolic process;regulation of biological process;response to stimulus	nucleus	DNA binding;protein binding	Tbl1x	Wnt signaling pathway		1.12822e+06	3.54915e+06	1.52124e+06	1.8713e+06	3.75299e+06	2.83589e+06	4.17273e+06	3.38313e+06	3.33809e+06	1.74896e+06
Q80VJ3	2'-deoxynucleoside 5'-phosphate N-hydrolase 1 OS=Mus musculus OX=10090 GN=Dnph1 PE=1 SV=2	cell differentiation;metabolic process;regulation of biological process;response to stimulus	cytoplasm;nucleus	catalytic activity;protein binding	BC048355; Dnph1			1.07186e+06	2.84354e+06	2.58731e+06	1.72785e+06	3149424	2.95686e+06	3.73846e+06	2.87198e+06	2.63158e+06	2.69993e+06
Q9JJ78	Lymphokine-activated killer T-cell-originated protein kinase OS=Mus musculus OX=10090 GN=Pbk PE=1 SV=1	metabolic process;regulation of biological process;response to stimulus	nucleus	catalytic activity;nucleotide binding	Pbk			5.6296e+07	3.04735e+07	4.22799e+07	3.97428e+07	5.08913e+07	7.89994e+07	4.42572e+07	5.66447e+07	4.64381e+07	6.12607e+07
A2A8L1	Chromodomain-helicase-DNA-binding protein 5 OS=Mus musculus OX=10090 GN=Chd5 PE=1 SV=1	cell differentiation;cell organization and biogenesis;metabolic process;regulation of biological process	chromosome;cytosol;membrane;nucleus	catalytic activity;DNA binding;metal ion binding;nucleotide binding;protein binding	Chd5			814580	1.17518e+06	923115	881491	1.35249e+06	990753	1.89899e+06	1.1347e+06	1.4588e+06	1.25117e+06
Q9DBS5	Kinesin light chain 4 OS=Mus musculus OX=10090 GN=Klc4 PE=1 SV=1		cytoplasm;cytoskeleton	catalytic activity;motor activity;protein binding	Klc4	Salmonella infection		1.04417e+07	1.93173e+07	1.48248e+07	1.29758e+07	2.03242e+07	2.14759e+07	1.89326e+07	1.99682e+07	2.00216e+07	2.14935e+07
Q8C7X2	ER membrane protein complex subunit 1 OS=Mus musculus OX=10090 GN=Emc1 PE=1 SV=1	metabolic process	endoplasmic reticulum;membrane		Emc1			1.04742e+06	0	0	0	2.01444e+06	0	0	2.61954e+06	1.38512e+06	0
O35495	Cyclin-dependent kinase 14 OS=Mus musculus OX=10090 GN=Cdk14 PE=1 SV=2	cell division;metabolic process;regulation of biological process;response to stimulus	cytoplasm;cytosol;membrane;nucleus	catalytic activity;nucleotide binding;protein binding	Cdk14	Transcriptional misregulation in cancer		1.84926e+07	1.57529e+07	1.18608e+07	1.45034e+07	1.76104e+07	2.26661e+07	1.43464e+07	1.66756e+07	2.6449e+07	2.21482e+07
P97376	Protein FRG1 OS=Mus musculus OX=10090 GN=Frg1 PE=1 SV=2	metabolic process	cytoplasm;nucleus;spliceosomal complex	protein binding;RNA binding	Frg1			3.27521e+06	3.18112e+06	1.15851e+06	1.39693e+06	4.21334e+06	3.36967e+06	4.11491e+06	3.5579e+06	4.13496e+06	2.10784e+06
Q9CU65	Zinc finger MYM-type protein 2 OS=Mus musculus OX=10090 GN=Zmym2 PE=1 SV=3	cell organization and biogenesis;development;metabolic process;regulation of biological process	cytoplasm;nucleus	DNA binding;metal ion binding;protein binding	Zmym2		PluriNetWork	2.99252e+07	1.51394e+07	1.31857e+07	8.22966e+06	1.75637e+07	2.53687e+07	1.97184e+07	1.74816e+07	2.38593e+07	2.34038e+07
Q8VE95	UPF0598 protein C8orf82 homolog OS=Mus musculus OX=10090 PE=1 SV=1	regulation of biological process	mitochondrion		C030006K11Rik			3.24355e+07	2.22058e+07	2.42038e+07	1.72468e+07	2.64886e+07	2.59569e+07	3.12423e+07	3.5351e+07	3.15561e+07	3.60117e+07
G5E870	E3 ubiquitin-protein ligase TRIP12 OS=Mus musculus OX=10090 GN=Trip12 PE=1 SV=1	metabolic process;regulation of biological process;response to stimulus	cytoplasm;nucleus	catalytic activity;metal ion binding;protein binding	Trip12	Ubiquitin mediated proteolysis		475817	871241	489773	756518	812536	809602	962952	638237	1.0074e+06	1.02738e+06
Q6ZQ03	Formin-binding protein 4 OS=Mus musculus OX=10090 GN=Fnbp4 PE=1 SV=2			protein binding	Fnbp4			2.95914e+07	2.42622e+07	3.78443e+07	1.63155e+07	45080902	3.41794e+07	5.17907e+07	3.9254e+07	4.02396e+07	3.43389e+07
Q6P9R1	ATP-dependent RNA helicase DDX51 OS=Mus musculus OX=10090 GN=Ddx51 PE=1 SV=1	metabolic process	cytoplasm;membrane;nucleus	catalytic activity;nucleotide binding;RNA binding	Ddx51			3.56718e+06	3.64036e+06	4.16853e+06	0	4906577	4.1194e+06	5.66139e+06	4.13708e+06	3.6297e+06	3.68709e+06
Q99K95	Replication termination factor 2 OS=Mus musculus OX=10090 GN=Rtf2 PE=1 SV=1	metabolic process	nucleus		2410001C21Rik; Rtfdc1			1.43289e+08	1.27277e+08	1.56e+08	9.13378e+07	2.40251e+08	2.07437e+08	2.43559e+08	1.84265e+08	1.78428e+08	1.74799e+08
Q61462	Cytochrome b-245 light chain OS=Mus musculus OX=10090 GN=Cyba PE=1 SV=3	cell organization and biogenesis;cellular homeostasis;defense response;metabolic process;regulation of biological process;response to stimulus;transport	cytoplasm;endosome;Golgi;membrane;mitochondrion;nucleus	catalytic activity;metal ion binding;protein binding	Cyba	Leukocyte transendothelial migration; NOD-like receptor signaling pathway; Osteoclast differentiation; Phagosome; Leishmaniasis	Microglia Pathogen Phagocytosis Pathway; Oxidative Stress	1.30336e+07	1.80797e+07	2.06125e+07	1.87156e+07	26340694	1.61912e+07	2.27429e+07	1.90455e+07	3.26547e+07	3.55089e+07
Q9Z127	Large neutral amino acids transporter small subunit 1 OS=Mus musculus OX=10090 GN=Slc7a5 PE=1 SV=2	cell differentiation;development;transport	cytoplasm;cytosol;membrane	transporter activity	Slc7a5	mTOR signaling pathway; Central carbon metabolism in cancer		1.04614e+07	7.85384e+06	9.99572e+06	7.11776e+06	1.36564e+07	1.28373e+07	1.2298e+07	1.31929e+07	1.14175e+07	1.42273e+07
Q9CQT1	Methylthioribose-1-phosphate isomerase OS=Mus musculus OX=10090 GN=Mri1 PE=1 SV=1	metabolic process	cytoplasm;cytosol;nucleus	catalytic activity;protein binding	Mri1	Metabolic pathways; Cysteine and methionine metabolism		2.74113e+06	3.7471e+06	3.90138e+06	2.58207e+06	4.28933e+06	4.46402e+06	4.56287e+06	4.62548e+06	3.73395e+06	5.09913e+06
Q99104	Unconventional myosin-Va OS=Mus musculus OX=10090 GN=Myo5a PE=1 SV=2	cell communication;cell differentiation;cell organization and biogenesis;cellular component movement;metabolic process;regulation of biological process;response to stimulus;transport	cytoplasm;cytoskeleton;cytosol;endoplasmic reticulum;endosome;extracellular;Golgi;membrane;vacuole	catalytic activity;metal ion binding;motor activity;nucleotide binding;protein binding;RNA binding	Myo5a			0	769803	1.51929e+06	1.2013e+06	1.91504e+06	2.08841e+06	1.25607e+06	1.71069e+06	1.05538e+06	922677
Q7TPD0	Integrator complex subunit 3 OS=Mus musculus OX=10090 GN=Ints3 PE=1 SV=2	metabolic process;regulation of biological process;response to stimulus	cytoplasm;nucleus		Ints3			898221	656277	0	1.10476e+06	1.41393e+06	721700	1.01129e+06	793297	1.10807e+06	1.665e+06
P24270	Catalase OS=Mus musculus OX=10090 GN=Cat PE=1 SV=4	cell differentiation;cell organization and biogenesis;metabolic process;regulation of biological process;response to stimulus	cytosol;endoplasmic reticulum;Golgi;membrane;mitochondrion;vacuole	antioxidant activity;catalytic activity;metal ion binding;nucleotide binding;protein binding	Cat	FoxO signaling pathway; Tryptophan metabolism; Amyotrophic lateral sclerosis (ALS); Longevity regulating pathway; Carbon metabolism; Glyoxylate and dicarboxylate metabolism; Longevity regulating pathway - multiple species; Peroxisome	Selenium Micronutrient Network; Folic Acid Network; Oxidative Stress; Tryptophan metabolism	0	6.30947e+06	8.2348e+06	5.03374e+06	8335935	5.90667e+06	9.44997e+06	5.87922e+06	6.39926e+06	8.59485e+06
Q64FW2	All-trans-retinol 13,14-reductase OS=Mus musculus OX=10090 GN=Retsat PE=1 SV=3	metabolic process	endoplasmic reticulum;membrane	catalytic activity	Retsat	Retinol metabolism	Retinol metabolism	1.03829e+07	1.6326e+07	1.69227e+07	1.32324e+07	1.72338e+07	1.68423e+07	2.1139e+07	1.9251e+07	1.95925e+07	1.92144e+07
P34789	40S ribosomal protein S28-2 OS=Arabidopsis thaliana OX=3702 GN=RPS28C PE=3 SV=1	cell organization and biogenesis;metabolic process	cytoplasm;ribosome	RNA binding;structural molecule activity	RPS28	Ribosome		2.25559e+07	2.36211e+07	2.57899e+07	1.846e+07	28492391	2.94625e+07	34239061	2.77009e+07	2.21938e+07	4.04746e+07
Q8CG72	ADP-ribose glycohydrolase ARH3 OS=Mus musculus OX=10090 GN=Adprhl2 PE=1 SV=1	response to stimulus	cytoplasm;mitochondrion;nucleus;organelle lumen	catalytic activity;metal ion binding	Adprhl2			9.38464e+06	8.40304e+06	5.09408e+06	6.77016e+06	5.22819e+06	9.38563e+06	1.01226e+07	9.07204e+06	7.94863e+06	8.63667e+06
Q6PNC0	DmX-like protein 1 OS=Mus musculus OX=10090 GN=Dmxl1 PE=1 SV=1	cell organization and biogenesis;cellular homeostasis		protein binding	Dmxl1			1.15888e+08	1.08621e+08	1.00226e+08	1.22474e+08	1.11207e+08	1.7535e+08	1.32295e+08	1.19788e+08	1.35784e+08	159744298
P62806	Histone H4 OS=Mus musculus OX=10090 GN=Hist1h4a PE=1 SV=2	cell organization and biogenesis;metabolic process;regulation of biological process	chromosome;membrane;nucleus	DNA binding;protein binding;RNA binding	Hist4h4; Hist1h4a; Hist1h4k; Hist1h4c; Hist1h4i; Hist1h4n; Hist1h4h; Hist1h4f; Hist1h4j; Hist1h4b; Hist1h4m; Hist1h4d; Hist2h4; LOC100862646; LOC102641229	Alcoholism; Systemic lupus erythematosus; Viral carcinogenesis	Type II interferon signaling (IFNG)	161672	237121	181628	255042	467014	265441	333011	354326	355452	378026
Q9D1P4	Cysteine and histidine-rich domain-containing protein 1 OS=Mus musculus OX=10090 GN=Chordc1 PE=1 SV=1	metabolic process;regulation of biological process		metal ion binding;nucleotide binding;protein binding	Chordc1			1.7443e+06	1.5739e+06	1.51731e+06	0	3.78089e+06	1.33686e+06	3.95162e+06	1.41309e+06	2.14755e+06	2.30269e+06
Q91ZR1	Ras-related protein Rab-4B OS=Mus musculus OX=10090 GN=Rab4b PE=1 SV=2	regulation of biological process;response to stimulus;transport	endosome;membrane;mitochondrion	catalytic activity;nucleotide binding	Rab4b			7.18527e+06	8.66404e+06	6.45697e+06	6.88731e+06	6468523	6.92194e+06	8.46433e+06	9.8574e+06	1.13949e+07	9.51376e+06
Q3THE2	Myosin regulatory light chain 12B OS=Mus musculus OX=10090 GN=Myl12b PE=1 SV=2	regulation of biological process		metal ion binding;protein binding	Myl12b	Leukocyte transendothelial migration; Regulation of actin cytoskeleton; Focal adhesion; Platelet activation; Tight junction		1.30775e+06	1.24907e+06	722243	677590	1.26642e+06	1.19464e+06	1.83282e+06	420308	1.62726e+06	1.68444e+06
P41241	Tyrosine-protein kinase CSK OS=Mus musculus OX=10090 GN=Csk PE=1 SV=2	cell differentiation;cell organization and biogenesis;defense response;metabolic process;regulation of biological process;response to stimulus	cytoplasm;membrane	catalytic activity;metal ion binding;nucleotide binding;protein binding	Csk		Chemokine signaling pathway; Regulation of Actin Cytoskeleton; EGFR1 Signaling Pathway; Integrin-mediated Cell Adhesion	0	0	3.76325e+06	1.58934e+06	3.27036e+06	2.30864e+06	3.0839e+06	3.62251e+06	2.1409e+06	0
Q9DB85	Ribosomal RNA-processing protein 8 OS=Mus musculus OX=10090 GN=Rrp8 PE=1 SV=1	cell communication;cell organization and biogenesis;metabolic process;regulation of biological process;response to stimulus	cytosol;membrane;nucleus	catalytic activity;protein binding;RNA binding	Rrp8			3.47129e+06	3.87427e+06	2.47091e+06	3.08922e+06	2964628	5.27152e+06	1.85158e+06	3.91459e+06	3.84702e+06	5.57494e+06
Q9EP97	Sentrin-specific protease 3 OS=Mus musculus OX=10090 GN=Senp3 PE=1 SV=1	metabolic process	cytoplasm;nucleus	catalytic activity;protein binding	Senp3			9.61196e+06	1.11948e+07	7.1617e+06	4.73066e+06	7.34724e+06	8.93375e+06	1.16404e+07	8.26989e+06	1.00524e+07	1.27181e+07
Q9D7N3	28S ribosomal protein S9, mitochondrial OS=Mus musculus OX=10090 GN=Mrps9 PE=1 SV=3	metabolic process	mitochondrion;ribosome	RNA binding;structural molecule activity	Mrps9	Ribosome		3.03237e+06	3.52419e+06	2.37035e+06	0	4.04912e+06	3.44651e+06	3.47965e+06	3.34979e+06	3.84706e+06	2.59931e+06
Q8C3X8	Lipase maturation factor 2 OS=Mus musculus OX=10090 GN=Lmf2 PE=1 SV=1	metabolic process	endoplasmic reticulum;membrane		Lmf2			7.33802e+07	5.33665e+07	5.14663e+07	3.63811e+07	68680436	5.63743e+07	8.105e+07	6.5804e+07	8.2965e+07	7.8619e+07
Q9ES74	Serine/threonine-protein kinase Nek7 OS=Mus musculus OX=10090 GN=Nek7 PE=1 SV=1	metabolic process;regulation of biological process	cytoplasm;cytoskeleton;nucleus	catalytic activity;metal ion binding;nucleotide binding;protein binding	Nek7	NOD-like receptor signaling pathway		4.91027e+06	6.04722e+06	6.25113e+06	5.98187e+06	5316221	5.75328e+06	9.71727e+06	8.40344e+06	5.35845e+06	7.47171e+06
Q5SFM8	RNA-binding protein 27 OS=Mus musculus OX=10090 GN=Rbm27 PE=1 SV=3	metabolic process	cytoplasm;nucleus	metal ion binding;RNA binding	Rbm27			8.45916e+06	4.0807e+06	4.24637e+06	4.80374e+06	5.1838e+06	6.17498e+06	8.48605e+06	7.23228e+06	8.12807e+06	4.44216e+06
Q9CRC8	Leucine-rich repeat-containing protein 40 OS=Mus musculus OX=10090 GN=Lrrc40 PE=1 SV=2	regulation of biological process;response to stimulus	membrane	protein binding	Lrrc40			1.46986e+06	2.43068e+06	2.24455e+06	1.5453e+06	1.6846e+06	2.42394e+06	2.67935e+06	2.32123e+06	2.01016e+06	2.62959e+06
Q99LC2	Cleavage stimulation factor subunit 1 OS=Mus musculus OX=10090 GN=Cstf1 PE=1 SV=1	metabolic process	nucleus	protein binding;RNA binding	Cstf1	mRNA surveillance pathway	mRNA processing	521989	519434	320582	402880	397874	508908	491689	382578	635493	761791
Q91VY9	Zinc finger protein 622 OS=Mus musculus OX=10090 GN=Znf622 PE=1 SV=1	regulation of biological process;response to stimulus	cytoplasm;cytosol;Golgi;nucleus	metal ion binding;RNA binding	Zfp622		mRNA processing	2.93644e+06	2.38379e+06	3.26744e+06	746531	3.34215e+06	3.84348e+06	4.8748e+06	1.85931e+06	3.13357e+06	2.58321e+06
Q6NXI6	Regulation of nuclear pre-mRNA domain-containing protein 2 OS=Mus musculus OX=10090 GN=Rprd2 PE=1 SV=1				Rprd2			4.7408e+06	3.67761e+06	3.37942e+06	3.98291e+06	7.25734e+06	4.02742e+06	8.29121e+06	4.99433e+06	5.17397e+06	7.10925e+06
Q8R2U4	N-terminal Xaa-Pro-Lys N-methyltransferase 1 OS=Mus musculus OX=10090 GN=Ntmt1 PE=1 SV=3	cell organization and biogenesis;metabolic process	cytoplasm;cytosol;nucleus	catalytic activity	Ntmt1			3.19948e+07	2.29653e+07	2.77496e+07	3.85817e+07	2.44801e+07	3.64858e+07	3.91223e+07	3.55662e+07	3.7854e+07	3.81152e+07
Q924S8	Sprouty-related, EVH1 domain-containing protein 1 OS=Mus musculus OX=10090 GN=Spred1 PE=1 SV=1	cell differentiation;development;regulation of biological process	membrane;nucleus	enzyme regulator activity;protein binding	Spred1		Kit Receptor Signaling Pathway	1.08069e+06	1.04363e+06	857433	977441	1.61737e+06	1.66984e+06	1.62268e+06	1.03672e+06	1.14971e+06	1.67958e+06
P61967	AP-1 complex subunit sigma-1A OS=Mus musculus OX=10090 GN=Ap1s1 PE=1 SV=1	response to stimulus;transport	cytosol;Golgi;membrane	protein binding;transporter activity	Ap1s1	Lysosome		6.07325e+06	2.65204e+06	5.93176e+06	6.54692e+06	4.63228e+06	6.89978e+06	7.60671e+06	6.68282e+06	6.25434e+06	5.70941e+06
A2A6Q5	Cell division cycle protein 27 homolog OS=Mus musculus OX=10090 GN=Cdc27 PE=1 SV=1	metabolic process;regulation of biological process	cytoplasm;nucleus	protein binding	Cdc27	Progesterone-mediated oocyte maturation; Ubiquitin mediated proteolysis; HTLV-I infection; Oocyte meiosis; Cell cycle		2.03555e+07	2.59925e+07	2.28196e+07	1.93525e+07	1.93144e+07	3.51315e+07	2.40778e+07	2.70373e+07	2.74862e+07	2.46224e+07
Q9DBH5	Vesicular integral-membrane protein VIP36 OS=Mus musculus OX=10090 GN=Lman2 PE=1 SV=2	regulation of biological process;transport	cell surface;Golgi;membrane	metal ion binding;protein binding	Lman2	Protein processing in endoplasmic reticulum		4.07029e+06	2.45031e+07	1.29318e+07	2.00059e+07	1.27877e+07	2.07473e+07	1.77101e+07	1.6355e+07	2.20091e+07	1.84397e+07
Q6P069	Sorcin OS=Mus musculus OX=10090 GN=Sri PE=1 SV=1	metabolic process;regulation of biological process;transport	cytoplasm;cytosol;endoplasmic reticulum;membrane;mitochondrion	catalytic activity;metal ion binding;protein binding	Sri			9.02607e+06	6.60532e+06	4.79808e+06	6.60348e+06	9.84832e+06	1.27092e+07	9.97824e+06	1.01835e+07	6.33365e+06	8.0787e+06
Q3KNM2	E3 ubiquitin-protein ligase MARCH5 OS=Mus musculus OX=10090 GN=March5 PE=1 SV=1	metabolic process;regulation of biological process	endoplasmic reticulum;membrane;mitochondrion	catalytic activity;metal ion binding;protein binding	2021-03-05			1.9816e+08	2.45592e+08	176701514	2.03975e+08	1.76486e+08	2.7204e+08	2.29151e+08	2.26339e+08	2.76229e+08	2.7714e+08
Q8K298	Anillin OS=Mus musculus OX=10090 GN=Anln PE=1 SV=2	cell differentiation;cell division;cellular component movement	cytoplasm;cytoskeleton;nucleus	protein binding	Anln			0	1.02948e+06	1.16015e+06	796074	0	1.93682e+06	1.88402e+06	0	0	0
P09542	Myosin light chain 3 OS=Mus musculus OX=10090 GN=Myl3 PE=1 SV=4	regulation of biological process		catalytic activity;metal ion binding;motor activity;protein binding	Myl3	Hypertrophic cardiomyopathy (HCM); Dilated cardiomyopathy; Cardiac muscle contraction; Adrenergic signaling in cardiomyocytes	Striated Muscle Contraction; Regulation of Actin Cytoskeleton	3.93234e+06	3.48221e+06	2.58514e+06	3.43858e+06	2.49341e+06	5.74577e+06	2.58669e+06	3.46093e+06	3.93166e+06	4.63608e+06
Q91VR2	ATP synthase subunit gamma, mitochondrial OS=Mus musculus OX=10090 GN=Atp5f1c PE=1 SV=1	metabolic process;transport	membrane;mitochondrion	catalytic activity;RNA binding;transporter activity	Atp5c1	Metabolic pathways; Huntington's disease; Oxidative phosphorylation; Parkinson's disease; Alzheimer's disease	Electron Transport Chain	2.26744e+06	2.16889e+06	2.00154e+06	2.08884e+06	2.89082e+06	2.03363e+06	2.67021e+06	4.44013e+06	3.10815e+06	2.33966e+06
Q9ESU6	Bromodomain-containing protein 4 OS=Mus musculus OX=10090 GN=Brd4 PE=1 SV=2	cell organization and biogenesis;cell proliferation;metabolic process;regulation of biological process	chromosome;nucleus	catalytic activity;DNA binding;protein binding	Brd4			4.74195e+06	6.14133e+06	3.90681e+06	4.92609e+06	1.79975e+06	6.10568e+06	6.75209e+06	4.1935e+06	7.78799e+06	2.59839e+06
P47963	60S ribosomal protein L13 OS=Mus musculus OX=10090 GN=Rpl13 PE=1 SV=3	metabolic process	membrane;nucleus;ribosome	RNA binding;structural molecule activity	Rpl13	Ribosome	Cytoplasmic Ribosomal Proteins	0	2.59561e+06	3.24859e+06	3.54966e+06	4.38691e+06	4.58875e+06	3.50846e+06	2.73252e+06	2.85807e+06	3.8792e+06
Q8VE11	Myotubularin-related protein 6 OS=Mus musculus OX=10090 GN=Mtmr6 PE=1 SV=1	metabolic process;transport	cytoplasm;nucleus	catalytic activity;receptor activity;signal transducer activity;transporter activity	Mtmr6	Metabolic pathways; Inositol phosphate metabolism; Phosphatidylinositol signaling system		9.87812e+07	9.8866e+07	1.2115e+08	1.39109e+08	9.47596e+07	1.32909e+08	1.57315e+08	1.25746e+08	1.31808e+08	1.56401e+08
P58058	NAD kinase OS=Mus musculus OX=10090 GN=Nadk PE=1 SV=2	metabolic process	cytosol	catalytic activity;metal ion binding;nucleotide binding	Nadk	Metabolic pathways; Nicotinate and nicotinamide metabolism		2.39354e+06	2.64427e+06	2.16988e+06	0	2.84401e+06	2.61842e+06	3.82576e+06	1.42898e+06	2.46504e+06	2.4585e+06
Q8BG07	Phospholipase D4 OS=Mus musculus OX=10090 GN=Pld4 PE=1 SV=1	cell differentiation;metabolic process;transport	endoplasmic reticulum;membrane;nucleus	catalytic activity;protein binding	Pld4	Metabolic pathways; Ether lipid metabolism; Glycerophospholipid metabolism		1.2902e+07	5.69619e+06	3.0782e+06	6.03815e+06	11900955	1.20911e+07	4.32934e+06	9.63764e+06	1.1663e+07	1.26942e+07
P51863	V-type proton ATPase subunit d 1 OS=Mus musculus OX=10090 GN=Atp6v0d1 PE=1 SV=2	cell organization and biogenesis;cellular homeostasis;response to stimulus;transport	endosome;membrane	catalytic activity;protein binding;transporter activity	Atp6v0d1	Rheumatoid arthritis; Metabolic pathways; Tuberculosis; Lysosome; Phagosome; Oxidative phosphorylation; Synaptic vesicle cycle; Collecting duct acid secretion; Viral carcinogenesis		5.44691e+06	6.06892e+06	5.60953e+06	2.27888e+06	6.99254e+06	6.418e+06	7.91375e+06	6.77729e+06	5.66326e+06	6.81191e+06
Q3TUU5	Testis-expressed protein 30 OS=Mus musculus OX=10090 GN=Tex30 PE=1 SV=1			catalytic activity	Tex30			6.8517e+07	7.48991e+07	6.67791e+07	6.1239e+07	6.9752e+07	1.01999e+08	8.51824e+07	7.5817e+07	8.89852e+07	8.20975e+07
Q60996	Serine/threonine-protein phosphatase 2A 56 kDa regulatory subunit gamma isoform OS=Mus musculus OX=10090 GN=Ppp2r5c PE=1 SV=2	metabolic process;regulation of biological process;response to stimulus	chromosome;cytosol;Golgi;nucleus	enzyme regulator activity;protein binding	Ppp2r5c	mRNA surveillance pathway; Dopaminergic synapse; Oocyte meiosis; Sphingolipid signaling pathway; PI3K-Akt signaling pathway; AMPK signaling pathway; Adrenergic signaling in cardiomyocytes	Focal Adhesion-PI3K-Akt-mTOR-signaling pathway; Glycogen Metabolism; IL-6 signaling Pathway; Wnt Signaling Pathway; Wnt Signaling Pathway and Pluripotency	4.70814e+07	3.18808e+07	3.2835e+07	2.0794e+07	3.48192e+07	4.24602e+07	4.39235e+07	5.08424e+07	3.59876e+07	3.97357e+07
Q8BMZ5	tRNA-splicing endonuclease subunit Sen34 OS=Mus musculus OX=10090 GN=Tsen34 PE=2 SV=2	metabolic process	nucleus	catalytic activity;protein binding	Tsen34			3.82232e+07	3.08305e+07	3.11823e+07	3.16369e+07	3.69957e+07	4.44045e+07	3.59086e+07	3.62748e+07	4.27343e+07	5.54807e+07
Q80U70	Polycomb protein Suz12 OS=Mus musculus OX=10090 GN=Suz12 PE=1 SV=2	cell organization and biogenesis;metabolic process;regulation of biological process	chromosome;nucleus	catalytic activity;DNA binding;metal ion binding;protein binding;RNA binding	Suz12		PluriNetWork	4.50362e+06	5.03294e+06	5.68994e+06	5.65067e+06	7.15782e+06	8.92531e+06	7.58335e+06	7.06059e+06	6.65518e+06	5.42953e+06
Q9D1I6	39S ribosomal protein L14, mitochondrial OS=Mus musculus OX=10090 GN=Mrpl14 PE=1 SV=1	metabolic process	mitochondrion;ribosome	RNA binding;structural molecule activity	Mrpl14	Ribosome		1.94229e+07	1.76077e+07	2.41249e+07	2.01108e+07	2.29998e+07	2.80926e+07	3.39489e+07	2.95389e+07	2.3703e+07	1.73176e+07
Q9ER00	Syntaxin-12 OS=Mus musculus OX=10090 GN=Stx12 PE=1 SV=1	cell organization and biogenesis;regulation of biological process;transport	endosome;Golgi;membrane	protein binding	Stx12	Phagosome		4.70149e+06	4.50435e+06	7.21106e+06	4.03307e+06	9.46451e+06	9.58881e+06	7.07129e+06	6.03218e+06	6.91587e+06	8.42691e+06
Q80TV8	CLIP-associating protein 1 OS=Mus musculus OX=10090 GN=Clasp1 PE=1 SV=2	cell division;cell organization and biogenesis;regulation of biological process	chromosome;cytoplasm;cytoskeleton;Golgi;membrane	protein binding	Clasp1			1.47496e+07	2.76931e+07	2.85701e+07	2.76049e+07	2.38269e+07	3.77296e+07	3.67102e+07	2.60387e+07	3.2977e+07	2.21092e+07
Q7TNV0	Protein DEK OS=Mus musculus OX=10090 GN=Dek PE=1 SV=1	cell organization and biogenesis;regulation of biological process	nucleus	DNA binding;protein binding;RNA binding	Dek			1.9822e+06	4.3895e+06	3.21269e+06	2.47743e+06	4.26079e+06	3.92478e+06	4.49974e+06	4.51083e+06	4.40459e+06	3.39348e+06
Q78IK4	MICOS complex subunit Mic27 OS=Mus musculus OX=10090 GN=Apool PE=1 SV=1	cell organization and biogenesis	membrane;mitochondrion		Apool			1.03937e+07	1.06636e+07	7.8562e+06	7.66968e+06	12735349	1.24601e+07	1.09501e+07	1.3474e+07	1.26693e+07	1.30829e+07
Q7TNP2	Serine/threonine-protein phosphatase 2A 65 kDa regulatory subunit A beta isoform OS=Mus musculus OX=10090 GN=Ppp2r1b PE=1 SV=2	cell death;regulation of biological process	membrane	protein binding	Ppp2r1b	mRNA surveillance pathway; Chagas disease (American trypanosomiasis); Dopaminergic synapse; Hippo signaling pathway; Oocyte meiosis; Sphingolipid signaling pathway; Long-term depression; TGF-beta signaling pathway; Hepatitis C; PI3K-Akt signaling pathway; AMPK signaling pathway; Tight junction; Adrenergic signaling in cardiomyocytes	Focal Adhesion-PI3K-Akt-mTOR-signaling pathway; Glycogen Metabolism; IL-6 signaling Pathway; Wnt Signaling Pathway and Pluripotency	461956	0	367258	0	587800	348286	644192	324733	0	481289
O08734	Bcl-2 homologous antagonist/killer OS=Mus musculus OX=10090 GN=Bak1 PE=1 SV=3	cell death;cell organization and biogenesis;cell proliferation;cellular homeostasis;metabolic process;regulation of biological process;response to stimulus;transport	cytosol;endoplasmic reticulum;membrane;mitochondrion	metal ion binding;protein binding	Bak1	Platinum drug resistance; MicroRNAs in cancer; Apoptosis - multiple species; Protein processing in endoplasmic reticulum; Viral carcinogenesis; Apoptosis	Apoptosis; Oxidative Damage	3.10966e+06	4.98588e+06	4.46751e+06	0	0	6.59118e+06	0	4.62777e+06	4.72306e+06	0
Q9DCZ4	MICOS complex subunit Mic26 OS=Mus musculus OX=10090 GN=Apoo PE=1 SV=2	cell organization and biogenesis	cytosol;endoplasmic reticulum;extracellular;Golgi;membrane;mitochondrion		Apoo			1.56771e+07	1.74094e+07	8.45132e+06	1.1465e+07	8.92948e+06	9.50051e+06	1.65788e+07	1.82996e+07	1.87321e+07	1.54686e+07
Q8R035	Peptidyl-tRNA hydrolase ICT1, mitochondrial OS=Mus musculus OX=10090 GN=Mrpl58 PE=1 SV=1	cell organization and biogenesis;metabolic process;regulation of biological process	mitochondrion;ribosome	catalytic activity;RNA binding	Ict1; Mrpl58			3.4102e+07	2.97462e+07	3.79658e+07	2.79637e+07	5.07371e+07	4.6154e+07	5.1423e+07	4.33183e+07	4.39942e+07	4.41347e+07
Q8BQM4	HEAT repeat-containing protein 3 OS=Mus musculus OX=10090 GN=Heatr3 PE=1 SV=1	transport		protein binding	Heatr3			2.31338e+06	3490750	2.9363e+06	0	3.34315e+06	2.49736e+06	3.84872e+06	2.97584e+06	3.17544e+06	2.82051e+06
Q99JT1	Glutamyl-tRNA(Gln) amidotransferase subunit B, mitochondrial OS=Mus musculus OX=10090 GN=Gatb PE=1 SV=1	cell organization and biogenesis;metabolic process	mitochondrion	catalytic activity;nucleotide binding	Pet112; Pet112l; Gatb	Metabolic pathways; Aminoacyl-tRNA biosynthesis		2.15713e+07	2.21165e+07	2.29144e+07	1.84341e+07	2.80009e+07	2.24901e+07	3.18027e+07	2.84667e+07	2.95519e+07	3.09284e+07
Q80T69	Lysine-specific demethylase 9 OS=Mus musculus OX=10090 GN=Rsbn1 PE=1 SV=3		nucleus	protein binding	Rsbn1			8.96748e+06	7.66952e+06	9.70322e+06	2.85207e+06	1.09167e+07	1.05134e+07	1.12616e+07	1.09502e+07	1.06922e+07	7.40074e+06
Q8BWG8	Beta-arrestin-1 OS=Mus musculus OX=10090 GN=Arrb1 PE=1 SV=1	cell death;cell organization and biogenesis;metabolic process;regulation of biological process;response to stimulus;transport	chromosome;cytoplasm;cytosol;membrane;nucleus	DNA binding;enzyme regulator activity;protein binding	Arrb1	Endocytosis; Morphine addiction; MAPK signaling pathway; Chemokine signaling pathway; Hedgehog signaling pathway; Olfactory transduction	Chemokine signaling pathway; Myometrial Relaxation and Contraction Pathways; MAPK signaling pathway; Wnt Signaling Pathway NetPath; Calcium Regulation in the Cardiac Cell	2.4416e+07	2.03287e+07	1.98796e+07	1.93965e+07	3.15043e+07	3.56661e+07	3.32621e+07	2.74202e+07	2.45533e+07	2.54136e+07
O88712	C-terminal-binding protein 1 OS=Mus musculus OX=10090 GN=Ctbp1 PE=1 SV=2	cell differentiation;metabolic process;regulation of biological process	cytoplasm;cytosol;nucleus	catalytic activity;nucleotide binding;protein binding	Ctbp1	Wnt signaling pathway; Notch signaling pathway; Pathways in cancer; Chronic myeloid leukemia	PluriNetWork; Notch Signaling Pathway; Wnt Signaling Pathway NetPath; Wnt Signaling Pathway and Pluripotency	3.40923e+06	3.8585e+06	7.38054e+06	4.28571e+06	6.20836e+06	8.04604e+06	6.00829e+06	5.47576e+06	7.34464e+06	4.96625e+06
Q9JKF7	39S ribosomal protein L39, mitochondrial OS=Mus musculus OX=10090 GN=Mrpl39 PE=1 SV=4	cell organization and biogenesis;metabolic process	mitochondrion;ribosome	nucleotide binding;RNA binding;structural molecule activity	Mrpl39			3.4702e+07	2.46964e+07	3.85063e+07	4.67385e+07	3.87023e+07	5.07173e+07	4.48411e+07	4.16642e+07	4.99476e+07	4.49653e+07
Q9CQC6	Basic leucine zipper and W2 domain-containing protein 1 OS=Mus musculus OX=10090 GN=Bzw1 PE=1 SV=1	metabolic process;regulation of biological process	cytoplasm;membrane	protein binding;RNA binding	Bzw1			253118	0	205582	244465	297146	222974	329199	259659	210872	243287
Q8C2A2	tRNA-splicing endonuclease subunit Sen54 OS=Mus musculus OX=10090 GN=Tsen54 PE=2 SV=2	metabolic process	nucleus	catalytic activity	Tsen54			2.48076e+07	1.76088e+07	3.41445e+07	2.21393e+07	4.06915e+07	39138616	4.31393e+07	3.69091e+07	3.01765e+07	2.70453e+07
Q3U3T8	WD repeat-containing protein 62 OS=Mus musculus OX=10090 GN=Wdr62 PE=1 SV=2	cell differentiation;cell organization and biogenesis;metabolic process;regulation of biological process	cytoplasm;cytoskeleton;nucleus;spliceosomal complex	protein binding;RNA binding	Wdr62			4.59524e+07	3.65659e+07	3.97866e+07	2.19317e+07	4.58834e+07	4.11035e+07	4.66775e+07	5.02249e+07	4.01092e+07	6.19434e+07
Q8CFD4	Sorting nexin-8 OS=Mus musculus OX=10090 GN=Snx8 PE=1 SV=1	cell organization and biogenesis;transport	cytosol;endosome;membrane	protein binding	Snx8			5.13301e+07	3.84626e+07	6.87246e+07	5.01302e+07	7.19477e+07	7.93905e+07	7.18624e+07	7.1276e+07	7.5025e+07	5.67124e+07
Q9D0R4	Probable ATP-dependent RNA helicase DDX56 OS=Mus musculus OX=10090 GN=Ddx56 PE=2 SV=1	metabolic process;regulation of biological process	cytoplasm;membrane;nucleus	catalytic activity;nucleotide binding;RNA binding	Ddx56		mRNA processing	2.36299e+06	3.71859e+06	2.71726e+06	1.07415e+06	4.08254e+06	3.13313e+06	4.3232e+06	3.34934e+06	4.25738e+06	2.53817e+06
B2RXC1	Trafficking protein particle complex subunit 11 OS=Mus musculus OX=10090 GN=Trappc11 PE=1 SV=1	cell organization and biogenesis;transport	Golgi	protein binding	Trappc11			4.21245e+07	3.22742e+07	4.31592e+07	3.05003e+07	4.27513e+07	4.6146e+07	5.26156e+07	5.53078e+07	4.31832e+07	4.32975e+07
Q3TIX9	U4/U6.U5 tri-snRNP-associated protein 2 OS=Mus musculus OX=10090 GN=Usp39 PE=1 SV=2	cell division;cell organization and biogenesis;metabolic process	nucleus;spliceosomal complex	catalytic activity;metal ion binding	Usp39	Spliceosome		2.13055e+06	4.65464e+06	3.91347e+06	2.72213e+06	4.06283e+06	4.06005e+06	4.02964e+06	4.73195e+06	3.3951e+06	5.81719e+06
Q9D1P0	39S ribosomal protein L13, mitochondrial OS=Mus musculus OX=10090 GN=Mrpl13 PE=1 SV=1	metabolic process	mitochondrion;ribosome	RNA binding;structural molecule activity	Mrpl13	Ribosome		3.69446e+06	4.0274e+06	5.06943e+06	3.18739e+06	4.65068e+06	4.63695e+06	5.93305e+06	4.8425e+06	5.7128e+06	4.8706e+06
P04202	Transforming growth factor beta-1 proprotein OS=Mus musculus OX=10090 GN=Tgfb1 PE=1 SV=1	cell differentiation;cell growth;cell organization and biogenesis;cell proliferation;cellular component movement;cellular homeostasis;defense response;metabolic process;regulation of biological process;response to stimulus;transport	cell surface;cytoplasm;extracellular;nucleus	enzyme regulator activity;protein binding	Tgfb1	FoxO signaling pathway; AGE-RAGE signaling pathway in diabetic complications; Endocytosis; Hypertrophic cardiomyopathy (HCM); Chagas disease (American trypanosomiasis); MAPK signaling pathway; Rheumatoid arthritis; Toxoplasmosis; Hippo signaling pathway; Tuberculosis; Dilated cardiomyopathy; Hepatitis B; HTLV-I infection; Intestinal immune network for IgA production; Osteoclast differentiation; I…	TGF Beta Signaling Pathway; Endochondral Ossification; Dopaminergic Neurogenesis; MicroRNAs in Cardiomyocyte Hypertrophy; PluriNetWork; Cytokines and Inflammatory Response; Spinal Cord Injury; Primary Focal Segmental Glomerulosclerosis FSGS; Lung fibrosis; Adipogenesis genes; MAPK signaling pathway	3.11286e+07	3.57022e+07	3.5566e+07	24920252	3.78752e+07	4.54333e+07	4.0739e+07	4.47857e+07	3.83917e+07	3.87607e+07
Q99KY4	Cyclin-G-associated kinase OS=Mus musculus OX=10090 GN=Gak PE=1 SV=2	cell differentiation;cell organization and biogenesis;metabolic process;regulation of biological process;transport	cytoplasm;cytosol;Golgi;membrane	catalytic activity;nucleotide binding;protein binding	Gak			1.32109e+07	2.41564e+07	3.80817e+07	9.41598e+06	34144708	4.60983e+07	2.83307e+07	3.34184e+07	2.05451e+07	2.14504e+07
Q9JJK5	Homocysteine-responsive endoplasmic reticulum-resident ubiquitin-like domain member 1 protein OS=Mus musculus OX=10090 GN=Herpud1 PE=1 SV=1	cellular homeostasis;metabolic process;regulation of biological process;response to stimulus;transport	endoplasmic reticulum;membrane	protein binding	Herpud1	Protein processing in endoplasmic reticulum	Exercise-induced Circadian Regulation; Exercise-induced Circadian Regulation	1.30043e+08	8.33967e+07	8.63558e+07	8.45122e+07	116547459	1.29708e+08	1.29379e+08	1.14547e+08	1.17673e+08	1.38724e+08
Q8R3F5	Malonyl-CoA-acyl carrier protein transacylase, mitochondrial OS=Mus musculus OX=10090 GN=Mcat PE=1 SV=3	metabolic process	mitochondrion	catalytic activity;RNA binding	Mcat	Fatty acid metabolism; Metabolic pathways; Fatty acid biosynthesis		2.26571e+07	3.6376e+07	3.92975e+07	1.14349e+07	1.73216e+07	4.70969e+07	8.85612e+06	3.89799e+07	4.13295e+07	2.35685e+07
Q9QY81	Nuclear pore membrane glycoprotein 210 OS=Mus musculus OX=10090 GN=Nup210 PE=1 SV=2	transport	endoplasmic reticulum;membrane;nucleus	protein binding	Nup210	RNA transport		0	0	3.89275e+06	0	2.37181e+06	2.00262e+06	2.73031e+06	0	0	3.14404e+06
Q99JX3	Golgi reassembly-stacking protein 2 OS=Mus musculus OX=10090 GN=Gorasp2 PE=1 SV=3	cell organization and biogenesis	Golgi;membrane	protein binding	Gorasp2			6.69814e+06	6.75808e+06	8.60573e+06	1.43599e+06	7.07567e+06	6.6914e+06	8.576e+06	8.25313e+06	7.26241e+06	7.65406e+06
Q3TWW8	Serine/arginine-rich splicing factor 6 OS=Mus musculus OX=10090 GN=Srsf6 PE=1 SV=1	cell organization and biogenesis;metabolic process;regulation of biological process;response to stimulus	nucleus	protein binding;RNA binding	Srsf6	Herpes simplex infection; Spliceosome	mRNA processing	691984	767252	646018	682315	1.32054e+06	969870	1.11472e+06	961860	1.02611e+06	1.0909e+06
Q99M04	Lipoyl synthase, mitochondrial OS=Mus musculus OX=10090 GN=Lias PE=1 SV=1	defense response;metabolic process;response to stimulus	mitochondrion	catalytic activity;metal ion binding	Lias	Metabolic pathways; Lipoic acid metabolism		3.8184e+08	4.30361e+08	3.6115e+08	316401401	4.26362e+08	529390718	5.26123e+08	3.69431e+08	4.18505e+08	5.63877e+08
P24636	Tubulin beta-4 chain OS=Arabidopsis thaliana OX=3702 GN=TUBB4 PE=2 SV=2	cell organization and biogenesis	cytoplasm;cytoskeleton;cytosol;extracellular;Golgi;membrane	catalytic activity;nucleotide binding;protein binding;structural molecule activity	TUB4	Phagosome		1.55105e+06	1.70716e+06	1.53027e+06	0	1546133	1.60951e+06	2.1359e+06	1.35725e+06	1.50431e+06	1.35102e+06
Q8R574	Phosphoribosyl pyrophosphate synthase-associated protein 2 OS=Mus musculus OX=10090 GN=Prpsap2 PE=1 SV=1	metabolic process		catalytic activity;metal ion binding	Prpsap2			4.10603e+06	1.36712e+06	2.75748e+06	0	2.79504e+06	1.60809e+06	4.43255e+06	3.82719e+06	3.96969e+06	0
Q80VQ0	Aldehyde dehydrogenase family 3 member B1 OS=Mus musculus OX=10090 GN=Aldh3b1 PE=1 SV=1	metabolic process;response to stimulus	cytoplasm;cytosol;membrane	catalytic activity	Aldh3b1	Histidine metabolism; Drug metabolism - cytochrome P450; Metabolic pathways; Glycolysis / Gluconeogenesis; beta-Alanine metabolism; Chemical carcinogenesis; Phenylalanine metabolism; Tyrosine metabolism; Metabolism of xenobiotics by cytochrome P450		8.36356e+06	6.99968e+06	7.69995e+06	3.51059e+06	6.59371e+06	8.28213e+06	9.10689e+06	7.05239e+06	8.52646e+06	8.64219e+06
Q5SVQ0	Histone acetyltransferase KAT7 OS=Mus musculus OX=10090 GN=Kat7 PE=1 SV=1	cell organization and biogenesis;metabolic process;regulation of biological process;response to stimulus	cytosol;nucleus	catalytic activity;DNA binding;metal ion binding	Kat7; Myst2			1.35546e+07	1.34116e+07	1.07483e+07	5.8978e+06	10224772	1.10419e+07	1.48999e+07	1.26403e+07	1.44232e+07	1.44706e+07
Q9Z1J3	Cysteine desulfurase, mitochondrial OS=Mus musculus OX=10090 GN=Nfs1 PE=1 SV=3	cell organization and biogenesis;metabolic process	cytoplasm;cytosol;mitochondrion;nucleus;organelle lumen	catalytic activity;metal ion binding;protein binding	Nfs1	Thiamine metabolism; Metabolic pathways; Sulfur relay system		212914	102210	133819	154905	206028	157850	213537	224484	200681	218184
Q6TEK5	Vitamin K epoxide reductase complex subunit 1-like protein 1 OS=Mus musculus OX=10090 GN=Vkorc1l1 PE=1 SV=1	metabolic process;response to stimulus	endoplasmic reticulum;membrane	catalytic activity	Vkorc1l1	Ubiquinone and other terpenoid-quinone biosynthesis		6.84698e+07	5.16805e+07	5.99084e+07	3.81228e+07	65656156	7.06314e+07	7.36069e+07	7.74382e+07	6.32989e+07	7.05828e+07
Q58A65	C-Jun-amino-terminal kinase-interacting protein 4 OS=Mus musculus OX=10090 GN=Spag9 PE=1 SV=2	cell differentiation;cell organization and biogenesis;regulation of biological process;transport	cytoplasm;cytosol	protein binding;structural molecule activity	Spag9			1.30441e+07	1.70336e+07	1.48281e+07	1.89969e+07	1.92155e+07	2.14603e+07	2.26368e+07	2.18771e+07	1.92187e+07	1.8852e+07
P50136	2-oxoisovalerate dehydrogenase subunit alpha, mitochondrial OS=Mus musculus OX=10090 GN=Bckdha PE=1 SV=1	metabolic process	mitochondrion;organelle lumen	catalytic activity;metal ion binding;protein binding	Bckdha			3.62826e+06	4.18244e+06	1.58713e+06	2.74677e+06	2.35621e+06	3.27521e+06	3.39043e+06	5.11681e+06	4.32881e+06	2.02768e+06
P84233	Histone H3.2 OS=Xenopus laevis OX=8355 PE=1 SV=2	metabolic process;regulation of biological process;transport	chromosome;nucleus	catalytic activity;DNA binding;metal ion binding;protein binding	hist2h3c; hist2h3c.L; LOC108695575; LOC108704296; LOC108704297; LOC108704298; LOC108705672; LOC108716540; LOC108716541			961693	1.1249e+06	889753	877313	1.57738e+06	876859	1.6177e+06	1.13772e+06	1.46702e+06	1.69405e+06
Q99JX4	Eukaryotic translation initiation factor 3 subunit M OS=Mus musculus OX=10090 GN=Eif3m PE=1 SV=1	metabolic process	cytoplasm	protein binding;RNA binding	Eif3m			1.22436e+06	1.35162e+06	1.15984e+06	1.54871e+06	1827371	1.1881e+06	2.17439e+06	1.8654e+06	1.91806e+06	1.74256e+06
Q9Z2W0	Aspartyl aminopeptidase OS=Mus musculus OX=10090 GN=Dnpep PE=1 SV=2	metabolic process	cytoplasm;cytosol;extracellular;nucleus	catalytic activity;metal ion binding;protein binding	Dnpep			3.69246e+06	1.78891e+06	2.34534e+06	2.9287e+06	1.86658e+06	4.22781e+06	6.13317e+06	1.9199e+06	1.62327e+06	1.86525e+06
Q9R0E1	Multifunctional procollagen lysine hydroxylase and glycosyltransferase LH3 OS=Mus musculus OX=10090 GN=Plod3 PE=1 SV=1	cell organization and biogenesis;metabolic process;response to stimulus	endoplasmic reticulum;Golgi;membrane	catalytic activity;metal ion binding	Plod3	Lysine degradation; Other types of O-glycan biosynthesis		1.2071e+06	0	0	1.48178e+06	1.24661e+06	1.16104e+06	0	1.31637e+06	995449	1.4401e+06
Q9Z1T1	AP-3 complex subunit beta-1 OS=Mus musculus OX=10090 GN=Ap3b1 PE=1 SV=2	cell organization and biogenesis;cellular component movement;coagulation;regulation of biological process;transport	Golgi;membrane	protein binding	Ap3b1	Lysosome		4.70248e+06	3.54405e+06	4.59129e+06	2.99558e+06	4.99744e+06	4.89842e+06	4.81367e+06	6.14126e+06	5.397e+06	4.71491e+06
Q5RJG1	Nucleolar protein 10 OS=Mus musculus OX=10090 GN=Nol10 PE=2 SV=1		nucleus	protein binding;RNA binding	Nol10			6.98437e+06	6.50836e+06	8.47816e+06	2.8382e+06	1.54615e+07	1.1842e+07	1.29812e+07	8.32749e+06	6.68838e+06	1.03376e+07
P33611	DNA polymerase alpha subunit B OS=Mus musculus OX=10090 GN=Pola2 PE=1 SV=2	metabolic process;transport	cytosol;nucleus	catalytic activity;DNA binding;protein binding	Pola2	DNA replication; Metabolic pathways; Purine metabolism; Pyrimidine metabolism	DNA Replication; Purine metabolism; G1 to S cell cycle control	2.88279e+06	2.20271e+06	2.54281e+06	0	3.33165e+06	3.16554e+06	2.43737e+06	2.70181e+06	2.91541e+06	2.43507e+06
P58742	Aladin OS=Mus musculus OX=10090 GN=Aaas PE=1 SV=1	response to stimulus;transport	cytosol;membrane;nucleus	protein binding	Aaas	RNA transport		8.91001e+06	4.04288e+06	6.40594e+06	4.93776e+06	9.13652e+06	5.49816e+06	1.0308e+07	9.31253e+06	5.86724e+06	1.06624e+07
Q8BKE6	Cytochrome P450 20A1 OS=Mus musculus OX=10090 GN=Cyp20a1 PE=1 SV=1	metabolic process	membrane	catalytic activity;metal ion binding	Cyp20a1		Metapathway biotransformation; Oxidation by Cytochrome P450	3.19409e+06	5.2047e+06	3.38083e+06	1.94193e+06	5.07683e+06	5.08545e+06	4.33245e+06	4.82564e+06	4.97887e+06	4.19376e+06
Q9DCS3	Enoyl-[acyl-carrier-protein] reductase, mitochondrial OS=Mus musculus OX=10090 GN=Mecr PE=1 SV=2	metabolic process	cytosol;mitochondrion;nucleus	catalytic activity;protein binding	Mecr	Fatty acid metabolism; Metabolic pathways; Fatty acid elongation	Fatty Acid Biosynthesis	6.2603e+06	5.93057e+06	8.97348e+06	8.1802e+06	1.17673e+07	1.22053e+07	1.0312e+07	1.07189e+07	1.12094e+07	6.708e+06
Q60649	Caseinolytic peptidase B protein homolog OS=Mus musculus OX=10090 GN=Clpb PE=1 SV=1	response to stimulus	mitochondrion	catalytic activity;nucleotide binding;protein binding	Clpb	Longevity regulating pathway - multiple species		3.63372e+06	3.40774e+06	5.87471e+06	8.72228e+06	6.64863e+06	6.06523e+06	7.46011e+06	7.08102e+06	6.19776e+06	8.39065e+06
Q9DCU6	39S ribosomal protein L4, mitochondrial OS=Mus musculus OX=10090 GN=Mrpl4 PE=1 SV=1	metabolic process	mitochondrion;ribosome	RNA binding;structural molecule activity	Mrpl4	Ribosome		8.42408e+06	1.46125e+07	8.01483e+06	2.8933e+06	6909488	9.3873e+06	8.76262e+06	1.16818e+07	8.42009e+06	1.25382e+07
Q9FFI0	Homeobox-leucine zipper protein HDG9 OS=Arabidopsis thaliana OX=3702 GN=HDG9 PE=2 SV=1	metabolic process;regulation of biological process	nucleus	DNA binding	HDG9			2.35326e+08	3.02803e+08	2.91552e+08	2.67588e+08	2.35506e+08	3.30446e+08	2.83688e+08	2.7438e+08	4.02342e+08	3.64536e+08
Q9QXB9	Developmentally-regulated GTP-binding protein 2 OS=Mus musculus OX=10090 GN=Drg2 PE=1 SV=1		cytoplasm;cytosol;membrane;mitochondrion	nucleotide binding	Drg2			3.70079e+06	3.96467e+06	2.84851e+06	0	4.57784e+06	3.55113e+06	4.21048e+06	3.81799e+06	3.82287e+06	3.33205e+06
Q8BMP6	Golgi resident protein GCP60 OS=Mus musculus OX=10090 GN=Acbd3 PE=1 SV=3	metabolic process;transport	Golgi;membrane;mitochondrion	protein binding	Acbd3			1.77518e+06	1.9436e+06	4.4535e+06	0	3.62195e+06	2.49409e+06	5.49806e+06	2.09972e+06	2.73608e+06	1.80775e+06
Q80UZ2	Protein SDA1 homolog OS=Mus musculus OX=10090 GN=Sdad1 PE=1 SV=1	cell organization and biogenesis;transport	nucleus		Sdad1			1.19026e+07	1.06568e+07	1.382e+07	1.24473e+07	1.56564e+07	1.309e+07	1.3515e+07	2.04412e+07	1.18854e+07	2.10771e+07
Q9JLB0	MAGUK p55 subfamily member 6 OS=Mus musculus OX=10090 GN=Mpp6 PE=1 SV=1	metabolic process	membrane	catalytic activity;protein binding	Mpp6			1.76319e+06	4.05474e+06	793317	0	2.24293e+06	2.33498e+06	1.74252e+06	1.83446e+06	2.11552e+06	2.95528e+06
Q8K0C9	GDP-mannose 4,6 dehydratase OS=Mus musculus OX=10090 GN=Gmds PE=1 SV=1	metabolic process;regulation of biological process;response to stimulus		catalytic activity;nucleotide binding;protein binding	Gmds	Metabolic pathways; Amino sugar and nucleotide sugar metabolism; Fructose and mannose metabolism		25618562	1.84338e+07	2.92373e+07	1.82969e+07	3.1141e+07	2.69981e+07	3.33255e+07	3.16559e+07	3.04108e+07	2.97296e+07
Q99LB2	Dehydrogenase/reductase SDR family member 4 OS=Mus musculus OX=10090 GN=Dhrs4 PE=1 SV=3	cell organization and biogenesis;metabolic process	membrane;mitochondrion;nucleus	catalytic activity;protein binding	Dhrs4	Retinol metabolism; Metabolic pathways; Peroxisome		1.55882e+07	1.26264e+07	6.73735e+06	2.89253e+06	1.18264e+07	1.26122e+07	9.70038e+06	1.18796e+07	1.39236e+07	1.34177e+07
Q9R0U0	Serine/arginine-rich splicing factor 10 OS=Mus musculus OX=10090 GN=Srsf10 PE=1 SV=2	cell organization and biogenesis;metabolic process;regulation of biological process;transport	cytosol;nucleus	protein binding;RNA binding	Srsf10	Spliceosome	mRNA processing	5.08242e+06	5.2763e+06	4.55475e+06	3.0315e+06	4.57891e+06	6.72021e+06	4.44789e+06	5.37561e+06	6.2023e+06	5.15233e+06
Q91YP2	Neurolysin, mitochondrial OS=Mus musculus OX=10090 GN=Nln PE=1 SV=1	metabolic process;regulation of biological process	cytoplasm;cytosol;membrane;mitochondrion	catalytic activity;metal ion binding	Nln	Renin-angiotensin system		5.39839e+06	6.34895e+06	8.45148e+06	3.92133e+06	1.23392e+07	1.05213e+07	7.97257e+06	1.06322e+07	8.30694e+06	7.69202e+06
Q6NV83	U2 snRNP-associated SURP motif-containing protein OS=Mus musculus OX=10090 GN=U2surp PE=1 SV=3	metabolic process	nucleus	RNA binding	U2surp	Spliceosome	mRNA processing	781588	430825	523546	738630	674264	547053	782242	894328	777077	896460
Q8VHX6	Filamin-C OS=Mus musculus OX=10090 GN=Flnc PE=1 SV=3		cytoplasm;cytoskeleton;cytosol;membrane	protein binding	Flnc	MAPK signaling pathway; Focal adhesion; Proteoglycans in cancer; Salmonella infection		300560	327498	213082	231768	439413	302347	378695	468390	374051	346698
Q60605	Myosin light polypeptide 6 OS=Mus musculus OX=10090 GN=Myl6 PE=1 SV=3	cellular component movement	membrane	catalytic activity;metal ion binding;motor activity;protein binding;structural molecule activity	Myl6	Oxytocin signaling pathway; Vascular smooth muscle contraction	Focal Adhesion	382386	1.83465e+06	123221	2.31366e+06	541660	1.51058e+06	312898	316965	2.33481e+06	1.94958e+06
Q921I2	Kelch domain-containing protein 4 OS=Mus musculus OX=10090 GN=Klhdc4 PE=2 SV=2			protein binding	Klhdc4			1.31698e+06	1.09668e+06	1.25965e+06	1.25867e+06	2085713	2.3665e+06	0	2.00356e+06	2.63553e+06	1.67239e+06
B2RY04	Dedicator of cytokinesis protein 5 OS=Mus musculus OX=10090 GN=Dock5 PE=1 SV=2	regulation of biological process;response to stimulus	cytoplasm;cytosol;membrane	protein binding	Dock5			6.71065e+07	7.11086e+07	6.78871e+07	6.4492e+07	8.71039e+07	1.07944e+08	9.30868e+07	7.8117e+07	8.1651e+07	8.14491e+07
Q00899	Transcriptional repressor protein YY1 OS=Mus musculus OX=10090 GN=Yy1 PE=1 SV=1	cell differentiation;cell organization and biogenesis;metabolic process;regulation of biological process;response to stimulus	cytoplasm;nucleus	DNA binding;metal ion binding;protein binding;RNA binding	Yy1		PluriNetWork; Delta-Notch Signaling Pathway	1.51733e+08	1.89188e+08	1.40355e+08	1.16318e+08	1.02946e+08	1.6662e+08	1.34344e+08	1.75308e+08	1.94876e+08	1.94975e+08
Q8R3C0	Mini-chromosome maintenance complex-binding protein OS=Mus musculus OX=10090 GN=Mcmbp PE=1 SV=1	cell division;cell organization and biogenesis;metabolic process	cytosol;membrane;nucleus		Mcmbp			664592	499444	435792	490425	603437	575216	653699	695481	516544	889445
Q3U9N9	Monocarboxylate transporter 10 OS=Mus musculus OX=10090 GN=Slc16a10 PE=1 SV=1	transport	membrane	transporter activity	Slc16a10	Protein digestion and absorption; Thyroid hormone signaling pathway		1.75566e+07	1.24654e+07	1.54942e+07	1.51967e+07	14926776	1.69889e+07	2.09474e+07	1.84098e+07	1.4637e+07	2.25275e+07
Q8K4M5	COMM domain-containing protein 1 OS=Mus musculus OX=10090 GN=Commd1 PE=1 SV=2	cellular homeostasis;metabolic process;regulation of biological process;transport	cytoplasm;cytosol;endosome;membrane;nucleus	metal ion binding;protein binding	Commd1		TNF-alpha NF-kB Signaling Pathway	3.46121e+07	3.47106e+07	4.51922e+07	2.74511e+07	5.99952e+07	5.04304e+07	4.89387e+07	5.0564e+07	3.99628e+07	5.97251e+07
Q5DW34	Histone-lysine N-methyltransferase EHMT1 OS=Mus musculus OX=10090 GN=Ehmt1 PE=1 SV=2	cell organization and biogenesis;metabolic process;regulation of biological process;response to stimulus	chromosome;nucleus	catalytic activity;metal ion binding;protein binding	Ehmt1	Lysine degradation; Longevity regulating pathway	PluriNetWork; Histone modifications; One Carbon Metabolism	4.5855e+06	9.13142e+06	9.45829e+06	9.29884e+06	9.84448e+06	7.8085e+06	1.06531e+07	1.12308e+07	1.03835e+07	1.22267e+07
Q9Z1D1	Eukaryotic translation initiation factor 3 subunit G OS=Mus musculus OX=10090 GN=Eif3g PE=1 SV=2	cell organization and biogenesis;metabolic process;regulation of biological process	cytoplasm;cytosol;nucleus	protein binding;RNA binding	Eif3g	RNA transport	Translation Factors; mRNA processing	3.26687e+06	2.78976e+06	2.43262e+06	3.65218e+06	0	3.52714e+06	2.40065e+06	3.3298e+06	3.00805e+06	2.73988e+06
Q3TIU4	2',5'-phosphodiesterase 12 OS=Mus musculus OX=10090 GN=Pde12 PE=1 SV=2	metabolic process;regulation of biological process;response to stimulus	mitochondrion;organelle lumen	catalytic activity;metal ion binding	Pde12			4.97108e+06	5.20453e+06	348165	2.487e+06	3.43051e+06	3.20323e+06	1.62171e+06	1.10065e+06	8.26105e+06	6.13024e+06
Q8BGZ7	Keratin, type II cytoskeletal 75 OS=Mus musculus OX=10090 GN=Krt75 PE=1 SV=1	cell differentiation;metabolic process;transport		catalytic activity;motor activity;protein binding;structural molecule activity;transporter activity	Krt75			8.71398e+06	14278774	1.64341e+07	5.39685e+06	1.01407e+07	2.00068e+07	1.32569e+07	9.88572e+06	1.11266e+07	1.36377e+07
Q99MU3	Double-stranded RNA-specific adenosine deaminase OS=Mus musculus OX=10090 GN=Adar PE=1 SV=2	cell differentiation;cell organization and biogenesis;defense response;metabolic process;regulation of biological process;response to stimulus;transport	cytoplasm;membrane;nucleus;spliceosomal complex	catalytic activity;DNA binding;metal ion binding;protein binding;RNA binding	Adar	Influenza A; Cytosolic DNA-sensing pathway; Measles	mRNA processing	200366	93502.8	203142	427704	160635	237017	218914	260033	432718	191817
Q922R5	Serine/threonine-protein phosphatase 4 regulatory subunit 3B OS=Mus musculus OX=10090 GN=Ppp4r3b PE=1 SV=2	metabolic process;regulation of biological process	cytoplasm;cytoskeleton;nucleus	protein binding	Smek2; Ppp4r3b	Glucagon signaling pathway		5.44299e+06	3.36665e+06	3.70801e+06	0	4536602	2.99921e+06	4.22714e+06	4.48507e+06	4.53498e+06	4.80817e+06
P83887	Tubulin gamma-1 chain OS=Mus musculus OX=10090 GN=Tubg1 PE=1 SV=1	cell organization and biogenesis;regulation of biological process	chromosome;cytoplasm;cytoskeleton;endosome	catalytic activity;nucleotide binding;protein binding;structural molecule activity	Tubg1			2.23714e+06	1.26611e+06	500062	1.56853e+06	0	261481	1.68112e+06	0	2.38872e+06	2.54258e+06
Q99J36	THUMP domain-containing protein 1 OS=Mus musculus OX=10090 GN=Thumpd1 PE=1 SV=1	metabolic process		RNA binding	Thumpd1			4.17288e+06	2.71582e+06	4.05341e+06	0	5.06997e+06	4.8612e+06	3.50625e+06	4.72384e+06	2.35712e+06	4.27988e+06
Q9DAV9	Trimeric intracellular cation channel type B OS=Mus musculus OX=10090 GN=Tmem38b PE=1 SV=1	transport	endoplasmic reticulum;membrane;nucleus	transporter activity	Tmem38b			5.78704e+06	5.93119e+06	6.23584e+06	2.64592e+06	5.77718e+06	4.71471e+06	6.08183e+06	5.46019e+06	7.50273e+06	8.73591e+06
Q93YW0	Protein EXECUTER 1, chloroplastic OS=Arabidopsis thaliana OX=3702 GN=EX1 PE=1 SV=1	cell death;response to stimulus	membrane	protein binding	EX1			2.19018e+08	1.9118e+08	220238875	182867901	2.37865e+08	283124400	2.41749e+08	2.70504e+08	2.47375e+08	2.5222e+08
P63325	40S ribosomal protein S10 OS=Mus musculus OX=10090 GN=Rps10 PE=1 SV=1	cell organization and biogenesis	cytoplasm;cytosol;membrane;nucleus;ribosome	RNA binding;structural molecule activity	Rps10	Ribosome	Cytoplasmic Ribosomal Proteins	8.1556e+06	7.90691e+06	6.99332e+06	3.47795e+06	7.26708e+06	6.72222e+06	6.38583e+06	6.97288e+06	8.44653e+06	13108754
O88447	Kinesin light chain 1 OS=Mus musculus OX=10090 GN=Klc1 PE=1 SV=3	cell organization and biogenesis;cellular component movement;transport	cytoplasm;cytoskeleton;cytosol;membrane	catalytic activity;motor activity;protein binding	Klc1			3.54181e+06	3.26191e+06	2.17084e+06	5.76936e+06	3.64454e+06	5.33693e+06	4.80269e+06	4.16075e+06	4.79955e+06	3.5447e+06
Q921T2	Torsin-1A-interacting protein 1 OS=Mus musculus OX=10090 GN=Tor1aip1 PE=1 SV=3	cell organization and biogenesis;regulation of biological process	membrane;nucleus	enzyme regulator activity;protein binding	Tor1aip1			0	514279	481055	361375	778210	386939	699937	452989	556264	531959
P98083	SHC-transforming protein 1 OS=Mus musculus OX=10090 GN=Shc1 PE=1 SV=3	cell differentiation;cell organization and biogenesis;defense response;metabolic process;regulation of biological process;response to stimulus	cytoplasm;cytosol;membrane;mitochondrion;nucleus;organelle lumen	protein binding	Shc1	ErbB signaling pathway; Phospholipase D signaling pathway; MicroRNAs in cancer; Ras signaling pathway; Prolactin signaling pathway; Focal adhesion; Insulin signaling pathway; Chemokine signaling pathway; Breast cancer; Neurotrophin signaling pathway; Alcoholism; Natural killer cell mediated cytotoxicity; Glioma; EGFR tyrosine kinase inhibitor resistance; Estrogen signaling pathway; Chronic myeloi…	IL-9 Signaling Pathway; EPO Receptor Signaling; IL-5 Signaling Pathway; Chemokine signaling pathway; IL-7 Signaling Pathway; p38 MAPK Signaling Pathway; IL-3 Signaling Pathway; IL-6 signaling Pathway; Kit Receptor Signaling Pathway; IL-2 Signaling Pathway; Alpha6-Beta4 Integrin Signaling Pathway; EGFR1 Signaling Pathway; Integrin-mediated Cell Adhesion; Insulin Signaling; Focal Adhesion	2.0683e+06	1.99513e+06	1.62252e+06	1.24186e+06	2643722	1.82366e+06	2.77126e+06	2.15075e+06	2.22435e+06	2.80626e+06
Q8BH24	Transmembrane 9 superfamily member 4 OS=Mus musculus OX=10090 GN=Tm9sf4 PE=1 SV=1	cell organization and biogenesis;cellular homeostasis;regulation of biological process;response to stimulus;transport	endosome;Golgi;membrane		Tm9sf4			1.08933e+07	1.93716e+07	2.08005e+07	1.88199e+07	19284759	3.21648e+07	1.74557e+07	1.66662e+07	2.245e+07	2.07725e+07
Q8C181	Muscleblind-like protein 2 OS=Mus musculus OX=10090 GN=Mbnl2 PE=2 SV=2	metabolic process;regulation of biological process	cytoplasm;nucleus	metal ion binding;RNA binding	Mbnl2			6.81088e+07	7.1953e+07	7.85828e+07	5.70734e+07	77050852	8.7604e+07	7.65248e+07	8.92477e+07	8.8394e+07	9.12364e+07
Q9CQD1	Ras-related protein Rab-5A OS=Mus musculus OX=10090 GN=Rab5a PE=1 SV=1	cell organization and biogenesis;metabolic process;regulation of biological process;response to stimulus;transport	cytoplasm;cytoskeleton;cytosol;endosome;membrane	catalytic activity;nucleotide binding;protein binding	Rab5a	Endocytosis; Ras signaling pathway; Amyotrophic lateral sclerosis (ALS); Tuberculosis; Phagosome; Vasopressin-regulated water reabsorption; Amoebiasis	EGFR1 Signaling Pathway	4.67129e+06	4.59888e+06	0	2.74567e+06	5435744	5.71884e+06	5.18559e+06	0	5.43069e+06	5.08291e+06
Q6PDL0	Cytoplasmic dynein 1 light intermediate chain 2 OS=Mus musculus OX=10090 GN=Dync1li2 PE=1 SV=2	cell organization and biogenesis;cellular component movement;response to stimulus;transport	chromosome;cytoplasm;cytoskeleton;endosome;membrane;vacuole	catalytic activity;motor activity;nucleotide binding;protein binding	Dync1li2	Phagosome; Salmonella infection; Vasopressin-regulated water reabsorption		5.65051e+06	7.18289e+06	4.19585e+06	8.93539e+06	3.9728e+06	7.76024e+06	8.88298e+06	6.16682e+06	7.67637e+06	6.23552e+06
Q9WUK2	Eukaryotic translation initiation factor 4H OS=Mus musculus OX=10090 GN=Eif4h PE=1 SV=3	cell organization and biogenesis;metabolic process;reproduction	cytoplasm;membrane	protein binding;RNA binding	Eif4h		Translation Factors; mRNA processing	1.59288e+07	1.19188e+07	1.17614e+07	1.6116e+07	1.3975e+07	1.60988e+07	1.69899e+07	1.59274e+07	1.96851e+07	1.67713e+07
Q8VCH8	UBX domain-containing protein 4 OS=Mus musculus OX=10090 GN=Ubxn4 PE=1 SV=1	metabolic process;response to stimulus	cytosol;endoplasmic reticulum;membrane;nucleus	protein binding	Ubxn4			4.50087e+06	5.85624e+06	6.14368e+06	4.66752e+06	5.94867e+06	6.09267e+06	5.31935e+06	5.88031e+06	6.7529e+06	9.18638e+06
Q8R0G9	Nuclear pore complex protein Nup133 OS=Mus musculus OX=10090 GN=Nup133 PE=1 SV=2	cell differentiation;cell organization and biogenesis;regulation of biological process;transport	chromosome;membrane;nucleus	protein binding;structural molecule activity;transporter activity	Nup133	RNA transport		1.54534e+06	2.24835e+06	2.32461e+06	2.60102e+06	3.16151e+06	2.71351e+06	3.37879e+06	2.05335e+06	4.26336e+06	2.14027e+06
Q924W5	Structural maintenance of chromosomes protein 6 OS=Mus musculus OX=10090 GN=Smc6 PE=1 SV=1	cell organization and biogenesis;metabolic process;regulation of biological process;response to stimulus	chromosome;nucleus	nucleotide binding;protein binding	Smc6			1.2977e+07	1.26796e+07	1.52551e+07	8.55452e+06	15877637	1.52152e+07	1.80681e+07	1.63896e+07	1.60347e+07	1.43082e+07
P97384	Annexin A11 OS=Mus musculus OX=10090 GN=Anxa11 PE=1 SV=2	cell division;response to stimulus;transport	cytoplasm;cytoskeleton;cytosol;membrane;nucleus;vacuole	metal ion binding;protein binding;RNA binding	Anxa11			0	3.20874e+06	5.38029e+06	1.39587e+06	1.95656e+06	7.56261e+06	5.16389e+06	0	1.89127e+06	0
Q8BPB0	MOB kinase activator 1B OS=Mus musculus OX=10090 GN=Mob1b PE=1 SV=3	metabolic process;regulation of biological process;response to stimulus	cytoplasm;cytosol;nucleus	catalytic activity;enzyme regulator activity;metal ion binding;protein binding	Mob1b	Hippo signaling pathway; Hippo signaling pathway -multiple species		1.4389e+07	1.40181e+07	1.28049e+07	1.10406e+07	1.56271e+07	1.36165e+07	1.77957e+07	1.89714e+07	1.5655e+07	1.69607e+07
Q8R050	Eukaryotic peptide chain release factor GTP-binding subunit ERF3A OS=Mus musculus OX=10090 GN=Gspt1 PE=1 SV=2	cell organization and biogenesis;metabolic process	cytosol	catalytic activity;nucleotide binding;RNA binding	Gspt1	mRNA surveillance pathway		0	5.45724e+06	4.25637e+06	3.36436e+06	6.32342e+06	6.26113e+06	5.23644e+06	4.36595e+06	4.63297e+06	3.22432e+06
P24288	Branched-chain-amino-acid aminotransferase, cytosolic OS=Mus musculus OX=10090 GN=Bcat1 PE=1 SV=2	metabolic process	cytoplasm;cytosol;mitochondrion	catalytic activity;protein binding	Bcat1	Valine, leucine and isoleucine degradation; Metabolic pathways; Biosynthesis of amino acids; 2-Oxocarboxylic acid metabolism; Cysteine and methionine metabolism; Valine, leucine and isoleucine biosynthesis; Pantothenate and CoA biosynthesis		5.50425e+06	1.01463e+07	1.56264e+07	1.34046e+07	1.8416e+07	1.36309e+07	2.01575e+07	1.79228e+07	1.42068e+07	1.11762e+07
P70288	Histone deacetylase 2 OS=Mus musculus OX=10090 GN=Hdac2 PE=1 SV=1	cell differentiation;cell organization and biogenesis;metabolic process;regulation of biological process;response to stimulus	chromosome;cytoplasm;nucleus	catalytic activity;DNA binding;protein binding;RNA binding	Hdac2	Epstein-Barr virus infection; Huntington's disease; Transcriptional misregulation in cancer; Notch signaling pathway; Thyroid hormone signaling pathway; Cell cycle; Pathways in cancer; Alcoholism; Viral carcinogenesis; Chronic myeloid leukemia; Longevity regulating pathway - multiple species	Estrogen signaling; PluriNetWork; TNF-alpha NF-kB Signaling Pathway; Delta-Notch Signaling Pathway; Notch Signaling Pathway; Histone modifications	1.83705e+06	2.03311e+06	1.58932e+06	0	2176841	1.32333e+06	2.12709e+06	1.85145e+06	1.86307e+06	2.13635e+06
Q8QZY9	Splicing factor 3B subunit 4 OS=Mus musculus OX=10090 GN=Sf3b4 PE=1 SV=1	metabolic process;regulation of biological process	nucleus;spliceosomal complex	RNA binding	Sf3b4	Spliceosome	mRNA processing	2.00276e+07	1.53767e+07	1.92871e+07	1.08066e+07	2.1993e+07	2.13424e+07	2.18421e+07	2.2617e+07	1.69953e+07	2.36825e+07
Q62426	Cystatin-B OS=Mus musculus OX=10090 GN=Cstb PE=1 SV=1	regulation of biological process;response to stimulus	cytoplasm;cytosol;nucleus	enzyme regulator activity;protein binding;RNA binding	Cstb			1.53255e+07	1.41173e+07	1.35437e+07	1.31963e+07	1.59834e+07	1.66929e+07	1.91437e+07	1.90453e+07	1.57848e+07	1.7129e+07
O88291	DBIRD complex subunit ZNF326 OS=Mus musculus OX=10090 GN=Znf326 PE=1 SV=1	metabolic process;regulation of biological process	nucleus;spliceosomal complex	DNA binding;metal ion binding;protein binding;RNA binding	Zfp326			2.51669e+06	3.41911e+06	2.51258e+06	3.49554e+06	1443674	3.59544e+06	3.2045e+06	2.69327e+06	3.78618e+06	3.00653e+06
Q9DBA6	Peroxisomal leader peptide-processing protease OS=Mus musculus OX=10090 GN=Tysnd1 PE=1 SV=1	cell organization and biogenesis;metabolic process;regulation of biological process	membrane	catalytic activity;protein binding	Tysnd1			6.98563e+07	6.66304e+07	6.89715e+07	5.58622e+07	7.81534e+07	7.69407e+07	8.6366e+07	8.47912e+07	8.36069e+07	8.12073e+07
Q9R013	Cathepsin F OS=Mus musculus OX=10090 GN=Ctsf PE=1 SV=1	metabolic process	vacuole	catalytic activity	Ctsf	Lysosome; Apoptosis		4.19897e+07	4.06583e+07	4.14154e+07	2.7336e+07	3.99087e+07	4.88777e+07	4.96657e+07	4.49587e+07	4.67706e+07	4.23516e+07
Q99LC5	Electron transfer flavoprotein subunit alpha, mitochondrial OS=Mus musculus OX=10090 GN=Etfa PE=1 SV=2	metabolic process;transport	mitochondrion;organelle lumen	catalytic activity;nucleotide binding;protein binding	Etfa			0	0	128926	0	192347	215074	0	175471	0	0
Q9LVW3	Anthocyanidin 3-O-glucoside 2'''-O-xylosyltransferase OS=Arabidopsis thaliana OX=3702 GN=A3G2XYLT PE=1 SV=1	metabolic process;response to stimulus		catalytic activity	UF3GT	Anthocyanin biosynthesis		6.53962e+08	743866477	5.72092e+08	7.5102e+08	6.28435e+08	8.14651e+08	8.47805e+08	6.63104e+08	856627249	8.88839e+08
Q4FK66	Pre-mRNA-splicing factor 38A OS=Mus musculus OX=10090 GN=Prpf38a PE=1 SV=1	metabolic process	membrane;nucleus;spliceosomal complex	RNA binding	Prpf38a	Spliceosome		1.47457e+07	1.61926e+07	1.613e+07	1.40502e+07	1.38536e+07	1.6444e+07	2.05766e+07	1.83247e+07	1.65384e+07	1.91651e+07
Q6ZPY7	Lysine-specific demethylase 3B OS=Mus musculus OX=10090 GN=Kdm3b PE=1 SV=2	cell organization and biogenesis;metabolic process;regulation of biological process;response to stimulus	chromosome;nucleus	antioxidant activity;catalytic activity;DNA binding;metal ion binding	Kdm3b			5.02542e+06	3.32114e+06	5.20338e+06	6.05546e+06	5.03682e+06	5.46908e+06	6.0568e+06	4.61899e+06	6.12942e+06	7.64389e+06
Q8R2M2	Deoxynucleotidyltransferase terminal-interacting protein 2 OS=Mus musculus OX=10090 GN=Dnttip2 PE=1 SV=1	metabolic process;regulation of biological process	nucleus	RNA binding	Dnttip2			3.64213e+06	4.29163e+06	4.93005e+06	3.58672e+06	5.56094e+06	6.11812e+06	5.86371e+06	6.06369e+06	4.86845e+06	3.79672e+06
Q01405	Protein transport protein Sec23A OS=Mus musculus OX=10090 GN=Sec23a PE=1 SV=2	cell organization and biogenesis;transport	cytoplasm;cytosol;endoplasmic reticulum;membrane	metal ion binding;protein binding	Sec23a	Protein processing in endoplasmic reticulum		2.99348e+06	4.56373e+06	333735	0	1694617	4.97618e+06	2.01339e+06	513745	474443	3.65121e+06
O70439	Syntaxin-7 OS=Mus musculus OX=10090 GN=Stx7 PE=1 SV=3	cell organization and biogenesis;regulation of biological process;transport	endosome;membrane;vacuole	protein binding	Stx7			5.75002e+06	6.30414e+06	6.49515e+06	4.08988e+06	6.1535e+06	5.78364e+06	5.71572e+06	6.3873e+06	5.88284e+06	1.11556e+07
Q62441	Transducin-like enhancer protein 4 OS=Mus musculus OX=10090 GN=Tle4 PE=1 SV=4	metabolic process;regulation of biological process;response to stimulus	nucleus	protein binding	Tle4		PluriNetWork	3.56842e+07	1.72613e+07	3.14797e+07	2.9392e+07	3.08917e+07	3.01731e+07	3.55256e+07	3.68541e+07	2.85866e+07	4.43692e+07
Q9S9Z8	14-3-3-like protein GF14 omicron OS=Arabidopsis thaliana OX=3702 GN=GRF11 PE=2 SV=2		cytoplasm;nucleus	protein binding	GRF11			7.32902e+06	7.65645e+06	9.36354e+06	2.75873e+06	1.03464e+07	1.05292e+07	9.41492e+06	8.54885e+06	8.83525e+06	8.08841e+06
Q91YE7	RNA-binding protein 5 OS=Mus musculus OX=10090 GN=Rbm5 PE=1 SV=1	cell death;cell organization and biogenesis;metabolic process;regulation of biological process	nucleus;spliceosomal complex	metal ion binding;RNA binding	Rbm5		mRNA processing	6.64376e+06	3.65568e+06	3.64577e+06	4.9634e+06	5.48597e+06	3.53279e+06	6.54127e+06	4.52453e+06	8.08897e+06	6.88051e+06
Q99020	Heterogeneous nuclear ribonucleoprotein A/B OS=Mus musculus OX=10090 GN=Hnrnpab PE=1 SV=1	cell organization and biogenesis;metabolic process;regulation of biological process	cytoplasm;nucleus	DNA binding;protein binding;RNA binding	Hnrnpab		mRNA processing	4.717e+06	3.86171e+06	5.49214e+06	3.9543e+06	5.98314e+06	6.63312e+06	6.36952e+06	5.25159e+06	4.91704e+06	5.91056e+06
P12368	cAMP-dependent protein kinase type II-alpha regulatory subunit OS=Rattus norvegicus OX=10116 GN=Prkar2a PE=1 SV=4	cell organization and biogenesis;regulation of biological process;response to stimulus	cytoplasm;membrane	enzyme regulator activity;nucleotide binding;protein binding	Prkar2a		Myometrial Relaxation and Contraction Pathways; Calcium Regulation in the Cardiac Cell; G Protein Signaling Pathways	5.42944e+06	9.44085e+06	1.04747e+07	9.43183e+06	1.18626e+07	1.03321e+07	1.33928e+07	1.30312e+07	1.07554e+07	8.96063e+06
Q9DC71	28S ribosomal protein S15, mitochondrial OS=Mus musculus OX=10090 GN=Mrps15 PE=1 SV=2	cell organization and biogenesis;metabolic process	mitochondrion;nucleus;ribosome	RNA binding;structural molecule activity	Mrps15	Ribosome		2.90745e+07	3.3747e+07	4.22862e+07	2.19695e+07	49917720	4.13389e+07	5.21239e+07	4.35321e+07	3.84816e+07	3.87626e+07
Q8R1Q8	Cytoplasmic dynein 1 light intermediate chain 1 OS=Mus musculus OX=10090 GN=Dync1li1 PE=1 SV=1	cell division;cell organization and biogenesis;cellular component movement;metabolic process;regulation of biological process;response to stimulus;transport	chromosome;cytoplasm;cytoskeleton;endosome;membrane;vacuole	catalytic activity;motor activity;nucleotide binding;protein binding;RNA binding	Dync1li1	Phagosome; Salmonella infection; Vasopressin-regulated water reabsorption		964870	0	844397	0	559932	279425	785378	425958	876328	498856
P62821	Ras-related protein Rab-1A OS=Mus musculus OX=10090 GN=Rab1A PE=1 SV=3	cell organization and biogenesis;cellular component movement;defense response;metabolic process;regulation of biological process;response to stimulus;transport	cytoplasm;cytosol;endoplasmic reticulum;endosome;Golgi;membrane	catalytic activity;nucleotide binding;protein binding	Rab1; Rab1a	Legionellosis		3.75818e+06	8.29606e+06	9.75312e+06	4.95504e+06	9491760	8.27916e+06	1.06629e+07	8.71404e+06	6.9207e+06	9.2629e+06
O08756	3-hydroxyacyl-CoA dehydrogenase type-2 OS=Mus musculus OX=10090 GN=Hsd17b10 PE=1 SV=4	cell organization and biogenesis;metabolic process	endoplasmic reticulum;membrane;mitochondrion	catalytic activity;nucleotide binding;protein binding;RNA binding	Hsd17b10		Tryptophan metabolism	1.2745e+06	4.81604e+06	1.20804e+06	2.69192e+06	2.19698e+06	2.25761e+06	3.71327e+06	2.52733e+06	3.22758e+06	3.01039e+06
Q9QVP9	Protein-tyrosine kinase 2-beta OS=Mus musculus OX=10090 GN=Ptk2b PE=1 SV=2	cell differentiation;cell organization and biogenesis;cell proliferation;cellular component movement;cellular homeostasis;defense response;metabolic process;regulation of biological process;response to stimulus	cytoplasm;cytoskeleton;membrane;nucleus	catalytic activity;nucleotide binding;protein binding;receptor activity;signal transducer activity;transporter activity	Ptk2b	Leukocyte transendothelial migration; Phospholipase D signaling pathway; Chemokine signaling pathway; Hepatitis B; Calcium signaling pathway; GnRH signaling pathway; Natural killer cell mediated cytotoxicity	IL-5 Signaling Pathway; Signaling of Hepatocyte Growth Factor Receptor; Chemokine signaling pathway; IL-7 Signaling Pathway; IL-6 signaling Pathway; IL-2 Signaling Pathway; EGFR1 Signaling Pathway	873945	4.14072e+06	6.04286e+06	3.07124e+06	1.76111e+06	6.76212e+06	2.54639e+06	6.2167e+06	2.73373e+06	951280
Q8K0V4	CCR4-NOT transcription complex subunit 3 OS=Mus musculus OX=10090 GN=Cnot3 PE=1 SV=1	cell differentiation;development;metabolic process;regulation of biological process	cytoplasm;nucleus	protein binding	Cnot3	RNA degradation		4.23558e+06	2.60621e+06	4.6111e+06	1.50997e+06	3.42285e+06	5.05274e+06	3.67214e+06	2.80718e+06	2.05746e+06	6.21159e+06
P63208	S-phase kinase-associated protein 1 OS=Homo sapiens OX=9606 GN=SKP1 PE=1 SV=2	cell organization and biogenesis;cellular homeostasis;metabolic process;regulation of biological process;response to stimulus	cytoplasm;cytosol;nucleus	catalytic activity;protein binding	SKP1	TGF-beta signaling pathway; Ubiquitin mediated proteolysis; Protein processing in endoplasmic reticulum; Wnt signaling pathway; Oocyte meiosis; Circadian rhythm; Herpes simplex infection; Cell cycle	TNF alpha Signaling Pathway; TGF-beta Signaling Pathway; Notch Signaling Pathway	8.97836e+06	6.9735e+06	6.03528e+06	5.78713e+06	7.54051e+06	9.42662e+06	9.5006e+06	7.59334e+06	9.78877e+06	6.34081e+06
O88622	Poly(ADP-ribose) glycohydrolase OS=Mus musculus OX=10090 GN=Parg PE=1 SV=2	metabolic process;regulation of biological process;response to stimulus	chromosome;cytosol;nucleus	catalytic activity	Parg			1.63538e+07	4.3031e+06	1.75342e+07	9.53777e+06	16704301	2.33444e+07	1.69122e+07	1.76896e+07	1.08246e+07	8.99409e+06
Q8R0A7	Uncharacterized protein KIAA0513 OS=Mus musculus OX=10090 GN=Kiaa0513 PE=1 SV=1				6430548M08Rik			6.18981e+07	5.8559e+07	4.66009e+07	6.20455e+07	5.71638e+07	6.79691e+07	5.93157e+07	6.68784e+07	7.85731e+07	7.27151e+07
Q61127	NGFI-A-binding protein 2 OS=Mus musculus OX=10090 GN=Nab2 PE=1 SV=2	cell differentiation;metabolic process;regulation of biological process	nucleus	protein binding	Nab2			3.95324e+07	4.37669e+07	3.84646e+07	2.51997e+07	3.6939e+07	4.60979e+07	3.67302e+07	4.84788e+07	4.09343e+07	4.95871e+07
Q61164	Transcriptional repressor CTCF OS=Mus musculus OX=10090 GN=Ctcf PE=1 SV=2	cell organization and biogenesis;metabolic process;regulation of biological process	chromosome;nucleus	DNA binding;metal ion binding;protein binding	Ctcf		SIDS Susceptibility Pathways; PluriNetWork	2.38782e+06	2.21684e+06	3.2339e+06	2.64461e+06	3.65115e+06	3.30141e+06	3.03519e+06	3.79657e+06	2.66503e+06	4.20777e+06
Q922E4	Ethanolamine-phosphate cytidylyltransferase OS=Mus musculus OX=10090 GN=Pcyt2 PE=1 SV=1	metabolic process		catalytic activity	Pcyt2	Metabolic pathways; Glycerophospholipid metabolism	One carbon metabolism and related pathways; Kennedy pathway	2.8388e+07	2.36454e+07	2.84472e+07	1.7791e+07	3.446e+07	3.65305e+07	3.43882e+07	3.12415e+07	3.30712e+07	2.4346e+07
Q9D1C1	Ubiquitin-conjugating enzyme E2 C OS=Mus musculus OX=10090 GN=Ube2c PE=1 SV=1	cell division;cell organization and biogenesis;metabolic process;regulation of biological process	cytoplasm;cytosol;membrane;nucleus	catalytic activity;nucleotide binding;protein binding	Ube2c	Ubiquitin mediated proteolysis		1.08506e+07	5.97552e+06	1.19957e+07	1.41779e+07	11015889	1.25494e+07	1.64006e+07	9.73461e+06	1.75136e+07	8.71525e+06
Q944R1	Probable pectate lyase 15 OS=Arabidopsis thaliana OX=3702 GN=At4g13710 PE=2 SV=1	metabolic process	extracellular	catalytic activity;metal ion binding	AT4G13710	Pentose and glucuronate interconversions		8.61827e+08	483959262	5.577e+08	6.47777e+08	5.18025e+08	6.79791e+08	5.68049e+08	7.18789e+08	1129700057	5.91725e+08
Q7M6Y3	Phosphatidylinositol-binding clathrin assembly protein OS=Mus musculus OX=10090 GN=Picalm PE=1 SV=1	cell organization and biogenesis;cell proliferation;development;metabolic process;regulation of biological process;response to stimulus;transport	cell surface;endosome;Golgi;membrane;nucleus	protein binding	Picalm			3.90576e+06	4.20699e+06	4.98414e+06	4.24664e+06	5.00939e+06	4.57466e+06	6.11777e+06	4.90816e+06	4.90462e+06	6.35321e+06
Q6NVG1	Lysophospholipid acyltransferase LPCAT4 OS=Mus musculus OX=10090 GN=Lpcat4 PE=1 SV=1	metabolic process	endoplasmic reticulum;membrane	catalytic activity	Lpcat4	Metabolic pathways; Ether lipid metabolism; Glycerophospholipid metabolism		3.42788e+07	2.53961e+07	2.40119e+07	3.20549e+07	2.4941e+07	3.32794e+07	3.53931e+07	2.46326e+07	3.40484e+07	4.16236e+07
Q64701	Retinoblastoma-like protein 1 OS=Mus musculus OX=10090 GN=Rbl1 PE=1 SV=3	cell organization and biogenesis;metabolic process;regulation of biological process	nucleus	protein binding	Rbl1	Cell cycle; TGF-beta signaling pathway; Viral carcinogenesis	G1 to S cell cycle control; Adipogenesis genes; Id Signaling Pathway	7.58358e+06	0	0	9.76198e+06	0	0	0	7.0468e+06	8.8058e+06	4.96132e+06
Q505D7	Optic atrophy 3 protein homolog OS=Mus musculus OX=10090 GN=Opa3 PE=1 SV=1	cell organization and biogenesis;regulation of biological process	mitochondrion		Opa3			2.89668e+07	3.39881e+07	3.43254e+07	2.80564e+07	3.60491e+07	3.57882e+07	3.99699e+07	4.37978e+07	4.38685e+07	3.0201e+07
P41216	Long-chain-fatty-acid--CoA ligase 1 OS=Mus musculus OX=10090 GN=Acsl1 PE=1 SV=2	metabolic process;regulation of biological process;response to stimulus;transport	endoplasmic reticulum;membrane;mitochondrion	catalytic activity;nucleotide binding	Acsl1	PPAR signaling pathway; Fatty acid metabolism; Metabolic pathways; Fatty acid degradation; Adipocytokine signaling pathway; Fatty acid biosynthesis; Peroxisome	Fatty Acid Beta Oxidation; PPAR signaling pathway; Fatty Acid Biosynthesis; Mitochondrial LC-Fatty Acid Beta-Oxidation	1.36252e+06	2.01965e+06	1.63653e+06	1.97986e+06	1767687	2.22749e+06	2.03509e+06	2.48774e+06	1.99072e+06	1.77385e+06
Q9CWZ3	RNA-binding protein 8A OS=Mus musculus OX=10090 GN=Rbm8a PE=1 SV=4	metabolic process;regulation of biological process;transport	cytoplasm;nucleus;spliceosomal complex	RNA binding	Rbm8a	mRNA surveillance pathway; Spliceosome; RNA transport	mRNA processing	1.82165e+06	1.70751e+06	1.26682e+06	1.08101e+06	2.84896e+06	1.39249e+06	2.44606e+06	1.82674e+06	1.98459e+06	2.8105e+06
P48453	Serine/threonine-protein phosphatase 2B catalytic subunit beta isoform OS=Mus musculus OX=10090 GN=Ppp3cb PE=1 SV=2	cell differentiation;metabolic process;regulation of biological process;response to stimulus;transport	cytosol;membrane	catalytic activity;metal ion binding;protein binding	Ppp3cb	Oxytocin signaling pathway; Wnt signaling pathway; T cell receptor signaling pathway; MAPK signaling pathway; Dopaminergic synapse; Amyotrophic lateral sclerosis (ALS); VEGF signaling pathway; Long-term potentiation; Amphetamine addiction; Tuberculosis; Axon guidance; HTLV-I infection; Oocyte meiosis; Osteoclast differentiation; B cell receptor signaling pathway; Glutamatergic synapse; cGMP-PKG s…	MicroRNAs in Cardiomyocyte Hypertrophy; Alzheimers Disease; MAPK signaling pathway	3.9078e+06	3.47179e+06	2.79202e+06	4.05412e+06	2.78052e+06	6.65987e+06	3.56511e+06	3.6936e+06	2.27223e+06	4.19042e+06
Q3TDQ1	Dolichyl-diphosphooligosaccharide--protein glycosyltransferase subunit STT3B OS=Mus musculus OX=10090 GN=Stt3b PE=1 SV=2	metabolic process;response to stimulus	endoplasmic reticulum;membrane	catalytic activity;metal ion binding	Stt3b	Metabolic pathways; N-Glycan biosynthesis; Protein processing in endoplasmic reticulum		5.05442e+06	1.06741e+07	7.15423e+06	4.86899e+06	6.00413e+06	4.97645e+06	3.68983e+06	9.79313e+06	1.18809e+07	1.01111e+07
Q9CY21	Probable 18S rRNA (guanine-N(7))-methyltransferase OS=Mus musculus OX=10090 GN=Bud23 PE=1 SV=1	cell organization and biogenesis;metabolic process;regulation of biological process	cytoplasm;nucleus	catalytic activity;protein binding;RNA binding	Wbscr22; Bud23			1.44795e+07	1.60638e+07	1.364e+07	1.34518e+07	9.91338e+06	1.61639e+07	1.6223e+07	1.54091e+07	1.67872e+07	1.62083e+07
Q3TWL2	Type 1 phosphatidylinositol 4,5-bisphosphate 4-phosphatase OS=Mus musculus OX=10090 GN=Pip4p1 PE=1 SV=1	metabolic process	endosome;membrane;vacuole	catalytic activity	Tmem55b	Phosphatidylinositol signaling system		1.50813e+07	1.26099e+07	1.32663e+07	1.28364e+07	1.5547e+07	1.82861e+07	14953010	1.59969e+07	1.66934e+07	1.6898e+07
O70370	Cathepsin S OS=Mus musculus OX=10090 GN=Ctss PE=1 SV=2	cell organization and biogenesis;metabolic process;regulation of biological process;response to stimulus	cell surface;membrane;organelle lumen;vacuole	catalytic activity;protein binding	Ctss	Tuberculosis; Lysosome; Phagosome; Antigen processing and presentation; Apoptosis		2.60658e+07	2.4636e+07	2.54987e+07	2.45757e+07	2.38843e+07	2.59504e+07	2.75242e+07	2.75228e+07	2.81114e+07	3.9767e+07
Q8BMK4	Cytoskeleton-associated protein 4 OS=Mus musculus OX=10090 GN=Ckap4 PE=1 SV=2		cell surface;cytoplasm;cytoskeleton;cytosol;endoplasmic reticulum;membrane	RNA binding	Ckap4	Protein processing in endoplasmic reticulum		5.18113e+06	4.11555e+06	4.96796e+06	1.52875e+06	6.20051e+06	6.99141e+06	4.49495e+06	6.30247e+06	3.46954e+06	5.00363e+06
P58368	Progressive ankylosis protein homolog B OS=Danio rerio OX=7955 GN=ankhb PE=2 SV=2	regulation of biological process;transport	membrane	transporter activity	ankhb			3.52275e+08	3.04242e+08	3.4036e+08	3.17356e+08	4.05492e+08	4.16058e+08	4.0822e+08	4.04749e+08	3.70567e+08	4.53754e+08
Q93ZQ5	SPX domain-containing membrane protein At4g22990 OS=Arabidopsis thaliana OX=3702 GN=At4g22990 PE=2 SV=2	transport	Golgi;membrane	transporter activity	AT4G22990			3.86134e+08	3.56646e+08	3.72636e+08	3.7473e+08	3.89733e+08	4.92726e+08	4.16976e+08	4.26161e+08	415244207	4.92963e+08
Q9CY73	39S ribosomal protein L44, mitochondrial OS=Mus musculus OX=10090 GN=Mrpl44 PE=1 SV=3	metabolic process	membrane;mitochondrion;nucleus;ribosome	catalytic activity;RNA binding	Mrpl44			5.47869e+06	6.11175e+06	4.96445e+06	5.8568e+06	9.03788e+06	5.25418e+06	8.88504e+06	8.25881e+06	7.56952e+06	7.57049e+06
O70624	Myocilin OS=Mus musculus OX=10090 GN=Myoc PE=1 SV=1	cell differentiation;cell organization and biogenesis;regulation of biological process;response to stimulus	cytoplasm;endoplasmic reticulum;extracellular;Golgi;membrane;mitochondrion	metal ion binding;protein binding	Myoc			1.62769e+08	1.94142e+08	1.35578e+08	1.47476e+08	1.23909e+08	1.88767e+08	1.91369e+08	1.56368e+08	1.76444e+08	1.98501e+08
P97477	Aurora kinase A OS=Mus musculus OX=10090 GN=Aurka PE=1 SV=1	cell division;cell growth;cell organization and biogenesis;metabolic process;regulation of biological process;response to stimulus	cytoplasm;cytoskeleton;cytosol;nucleus	catalytic activity;nucleotide binding;protein binding	Aurka	Oocyte meiosis		5.08136e+06	6.52498e+06	7.51243e+06	2.72259e+06	7.29515e+06	8.29904e+06	7.48627e+06	2.96264e+06	9.05508e+06	6.96242e+06
B2RX14	Terminal uridylyltransferase 4 OS=Mus musculus OX=10090 GN=Tut4 PE=1 SV=2	metabolic process;regulation of biological process;response to stimulus	cytoplasm;cytosol;nucleus	catalytic activity;metal ion binding;protein binding;RNA binding	Zcchc11			8.32451e+07	7.40325e+07	6.33898e+07	5.81216e+07	1.07317e+08	1.12261e+08	7.46865e+07	9.01267e+07	8.07114e+07	1.02742e+08
Q6PB44	Tyrosine-protein phosphatase non-receptor type 23 OS=Mus musculus OX=10090 GN=Ptpn23 PE=1 SV=2	cell organization and biogenesis;metabolic process;regulation of biological process;transport	cytoplasm;cytoskeleton;cytosol;endosome;nucleus	catalytic activity;protein binding	Ptpn23			0	3.08169e+06	3.41162e+06	2.05893e+06	3716857	3.78558e+06	3.85533e+06	3.60043e+06	3.38292e+06	0
P61971	Nuclear transport factor 2 OS=Mus musculus OX=10090 GN=Nutf2 PE=1 SV=1	cell organization and biogenesis;regulation of biological process;transport	cytoplasm;cytosol;membrane;nucleus	protein binding;transporter activity	Nutf2; Gm10349; Nutf2-ps2			1.13722e+07	7.8132e+06	9.61876e+06	1.70441e+07	8.34451e+06	9.87472e+06	1.734e+07	1.55181e+07	9.54848e+06	1.2294e+07
P53395	Lipoamide acyltransferase component of branched-chain alpha-keto acid dehydrogenase complex, mitochondrial OS=Mus musculus OX=10090 GN=Dbt PE=1 SV=2	metabolic process	mitochondrion;organelle lumen	catalytic activity;protein binding	Dbt	Valine, leucine and isoleucine degradation; Metabolic pathways; Propanoate metabolism		1.37081e+07	1.764e+07	1.71619e+07	1.25288e+07	1.43391e+07	2.38222e+07	1.94103e+07	1.83408e+07	1.29108e+07	1.53053e+07
Q8CJG0	Protein argonaute-2 OS=Mus musculus OX=10090 GN=Ago2 PE=1 SV=3	cell differentiation;cell organization and biogenesis;development;metabolic process;regulation of biological process;response to stimulus	cytoplasm;cytosol;membrane;mitochondrion;nucleus	catalytic activity;DNA binding;metal ion binding;protein binding;RNA binding	Ago2; Eif2c2			3.5926e+07	2.71278e+07	3.58192e+07	2.94587e+07	3.94278e+07	4.02905e+07	4.23774e+07	3.86126e+07	3.97289e+07	3.86552e+07
P49769	Presenilin-1 OS=Mus musculus OX=10090 GN=Psen1 PE=1 SV=1	cell death;cell differentiation;cell organization and biogenesis;cell proliferation;cellular component movement;cellular homeostasis;metabolic process;regulation of biological process;response to stimulus;transport	cell surface;chromosome;cytoplasm;endoplasmic reticulum;Golgi;membrane;mitochondrion;nucleus	catalytic activity;protein binding;transporter activity	Psen1	Wnt signaling pathway; Notch signaling pathway; Neurotrophin signaling pathway; Alzheimer's disease	PluriNetWork; Alzheimers Disease; Delta-Notch Signaling Pathway; Notch Signaling Pathway	229932847	237270996	2.26856e+08	1.98133e+08	2.61155e+08	3.14744e+08	2.75836e+08	2.85612e+08	2.36019e+08	2.6037e+08
P24668	Cation-dependent mannose-6-phosphate receptor OS=Mus musculus OX=10090 GN=M6pr PE=1 SV=1	transport	endosome;membrane;vacuole	transporter activity	M6pr	Lysosome; Phagosome		2.37372e+06	2.08967e+06	2.02485e+06	2.62759e+06	3184884	2.74482e+06	3.65389e+06	3.40063e+06	2.14765e+06	2.69188e+06
Q3THJ3	Probable RNA-binding protein EIF1AD OS=Mus musculus OX=10090 GN=Eif1ad PE=1 SV=2	metabolic process	nucleus	RNA binding	Eif1ad			9.59817e+07	7.75604e+07	1.05069e+08	6.8774e+07	9.13513e+07	9.19758e+07	1.26986e+08	1.20919e+08	8.14005e+07	1.00784e+08
P33174	Chromosome-associated kinesin KIF4 OS=Mus musculus OX=10090 GN=Kif4 PE=1 SV=3	cell organization and biogenesis;cellular component movement;metabolic process	chromosome;cytoplasm;cytoskeleton;cytosol;membrane;nucleus	catalytic activity;DNA binding;metal ion binding;motor activity;nucleotide binding;protein binding	Kif4			1.36972e+06	1.43619e+06	1.62132e+06	1.56063e+06	1.42829e+06	1.43794e+06	1.78461e+06	1.79328e+06	2.20388e+06	1.60252e+06
Q5SSZ5	Tensin-3 OS=Mus musculus OX=10090 GN=Tns3 PE=1 SV=1	cellular component movement;regulation of biological process	cytosol	protein binding	Tns3			0	71925	64843	0	203786	118499	0	123795	162655	0
Q80WJ7	Protein LYRIC OS=Mus musculus OX=10090 GN=Mtdh PE=1 SV=1	cell organization and biogenesis;regulation of biological process;response to stimulus	cytoplasm;endoplasmic reticulum;membrane;nucleus	protein binding;RNA binding	Mtdh			1.99164e+06	0	0	1.24435e+06	1.04084e+06	531597	789665	711966	1.76397e+06	1.2875e+06
P12815	Programmed cell death protein 6 OS=Mus musculus OX=10090 GN=Pdcd6 PE=1 SV=2	cell death;cell organization and biogenesis;metabolic process;regulation of biological process;response to stimulus;transport	cytoplasm;endoplasmic reticulum;endosome;membrane;nucleus	catalytic activity;metal ion binding;protein binding	Pdcd6			4.77528e+06	4.99605e+06	5.31251e+06	3.49881e+06	7.37756e+06	5.36102e+06	7.88841e+06	6.26338e+06	5.89582e+06	5.44744e+06
Q8C854	Myelin expression factor 2 OS=Mus musculus OX=10090 GN=Myef2 PE=1 SV=1	metabolic process;regulation of biological process	nucleus	DNA binding;RNA binding	Myef2		Mitochondrial Gene Expression; MicroRNAs in Cardiomyocyte Hypertrophy; mRNA processing	5.17402e+06	4.1821e+06	2.76738e+06	4.38098e+06	5131877	3.37071e+06	5.58235e+06	5.93558e+06	5.99031e+06	4.82653e+06
Q9CZX9	ER membrane protein complex subunit 4 OS=Mus musculus OX=10090 GN=Emc4 PE=1 SV=1	cell death;metabolic process	membrane		Emc4			1.74072e+07	1.35156e+07	1.84756e+07	1.38386e+07	2.00246e+07	1.99992e+07	2.16065e+07	2.0822e+07	1.87788e+07	1.76855e+07
Q9DBR7	Protein phosphatase 1 regulatory subunit 12A OS=Mus musculus OX=10090 GN=Ppp1r12a PE=1 SV=2	cell organization and biogenesis;metabolic process;regulation of biological process;response to stimulus	chromosome;cytoplasm;cytoskeleton;cytosol	catalytic activity;enzyme regulator activity;protein binding	Ppp1r12a	Oxytocin signaling pathway; Regulation of actin cytoskeleton; Focal adhesion; Platelet activation; Proteoglycans in cancer; cGMP-PKG signaling pathway; cAMP signaling pathway; Vascular smooth muscle contraction	Regulation of Actin Cytoskeleton; Focal Adhesion	6.57331e+06	5.40708e+06	5.65766e+06	3.74445e+06	6.52855e+06	5.8188e+06	6.65981e+06	6.34024e+06	7.13166e+06	7.19535e+06
Q8CCJ3	E3 UFM1-protein ligase 1 OS=Mus musculus OX=10090 GN=Ufl1 PE=1 SV=2	cell differentiation;metabolic process;regulation of biological process;response to stimulus	cytoplasm;cytosol;endoplasmic reticulum;membrane	catalytic activity;protein binding	Ufl1			3.76885e+06	4.86866e+06	4.05295e+06	4.45677e+06	5.57337e+06	7.63605e+06	5.45741e+06	5.38959e+06	4.57902e+06	3.91248e+06
Q6A0D4	Raftlin OS=Mus musculus OX=10090 GN=Rftn1 PE=1 SV=4	cell organization and biogenesis;regulation of biological process;response to stimulus;transport	cytoplasm;endosome;membrane	RNA binding	Rftn1			7.60715e+06	8.43238e+06	4.84896e+06	7.53805e+06	4.80031e+06	6.56764e+06	9.84594e+06	6.63165e+06	9.67183e+06	6.72654e+06
Q8VCB1	Nucleoporin NDC1 OS=Mus musculus OX=10090 GN=Ndc1 PE=1 SV=1	cell organization and biogenesis;transport	cytoplasm;cytoskeleton;membrane;nucleus	structural molecule activity	Ndc1; Tmem48	RNA transport		1.54771e+06	1.08565e+06	1.39387e+06	1.06325e+06	1.24828e+06	1.48927e+06	1.08935e+06	2.14991e+06	1.55799e+06	1.23782e+06
Q9CPR5	39S ribosomal protein L15, mitochondrial OS=Mus musculus OX=10090 GN=Mrpl15 PE=1 SV=1	cell organization and biogenesis;metabolic process	mitochondrion;ribosome	RNA binding;structural molecule activity	Mrpl15	Ribosome		1.34016e+06	2.88374e+06	1.29873e+06	0	2.36742e+06	2.74725e+06	2.09009e+06	1.75639e+06	1.73843e+06	1.03325e+06
P55194	SH3 domain-binding protein 1 OS=Mus musculus OX=10090 GN=Sh3bp1 PE=1 SV=3	cell differentiation;cell organization and biogenesis;cellular component movement;regulation of biological process;response to stimulus;transport	cytoplasm;cytosol;nucleus	enzyme regulator activity;protein binding	Sh3bp1			9.8969e+06	1.08988e+07	1.18897e+07	8.34351e+06	1.3795e+07	1.29848e+07	1.31904e+07	1.29611e+07	1.15203e+07	1.43448e+07
Q9EP82	tRNA (guanine-N(7)-)-methyltransferase non-catalytic subunit WDR4 OS=Mus musculus OX=10090 GN=Wdr4 PE=1 SV=2	metabolic process	cytosol;nucleus	catalytic activity;protein binding	Wdr4			4.5215e+07	4.71323e+07	4.66888e+07	3.76139e+07	5.74007e+07	4.90386e+07	6.65509e+07	5.91885e+07	4.52379e+07	5.7385e+07
Q8BXA5	Cleft lip and palate transmembrane protein 1-like protein OS=Mus musculus OX=10090 GN=Clptm1l PE=1 SV=1	cell death	membrane		Clptm1l			1.71974e+07	1.49107e+07	1.88916e+07	1.41953e+07	17736625	1.84726e+07	2.01872e+07	1.81727e+07	2.14775e+07	1.99692e+07
Q8BTZ7	Mannose-1-phosphate guanyltransferase beta OS=Mus musculus OX=10090 GN=Gmppb PE=1 SV=1	metabolic process	cytoplasm;mitochondrion	catalytic activity;nucleotide binding	Gmppb	Metabolic pathways; Amino sugar and nucleotide sugar metabolism; Fructose and mannose metabolism		7.20606e+06	1.08704e+07	1.08218e+07	7.10366e+06	1.07414e+07	9.98052e+06	1.20895e+07	1.07655e+07	1.21241e+07	1.04108e+07
G3X9K3	Brefeldin A-inhibited guanine nucleotide-exchange protein 1 OS=Mus musculus OX=10090 GN=Arfgef1 PE=1 SV=1	cell organization and biogenesis;regulation of biological process;transport	cytoplasm;cytosol;Golgi;membrane;nucleus	protein binding	Arfgef1	Endocytosis		9.45669e+06	5.13257e+06	4.66623e+06	4.59312e+06	3.17954e+06	7.34916e+06	2.775e+06	9.66343e+06	2.77951e+06	9.44726e+06
P70279	Surfeit locus protein 6 OS=Mus musculus OX=10090 GN=Surf6 PE=1 SV=1	cell organization and biogenesis	nucleus	DNA binding;RNA binding	Surf6			1.47837e+07	1.6311e+07	1.36349e+07	1.12952e+07	1.73983e+07	1.33732e+07	2.03215e+07	1.88698e+07	1.91606e+07	1.52186e+07
Q6A4J8	Ubiquitin carboxyl-terminal hydrolase 7 OS=Mus musculus OX=10090 GN=Usp7 PE=1 SV=1	cell organization and biogenesis;development;metabolic process;regulation of biological process;response to stimulus	chromosome;cytoplasm;cytosol;nucleus	catalytic activity;protein binding	Usp7	FoxO signaling pathway; Herpes simplex infection; Epstein-Barr virus infection; Viral carcinogenesis	PluriNetWork	0	3.64404e+06	2.58943e+06	2.50426e+06	2.56678e+06	3.18201e+06	3.34176e+06	2.71254e+06	4.14737e+06	0
Q8BG81	Polymerase delta-interacting protein 3 OS=Mus musculus OX=10090 GN=Poldip3 PE=1 SV=1	regulation of biological process;transport	cytoplasm;nucleus	RNA binding	Poldip3		mRNA processing	4.47653e+07	4.23125e+07	4.2681e+07	39660369	4.62511e+07	4.49712e+07	5.27577e+07	5.28314e+07	5.23319e+07	5.23799e+07
Q99JW4	LIM and senescent cell antigen-like-containing domain protein 1 OS=Mus musculus OX=10090 GN=Lims1 PE=1 SV=3	cell organization and biogenesis;regulation of biological process;response to stimulus	membrane	metal ion binding;protein binding	Lims1			4.25244e+06	4.16014e+06	4.35319e+06	2.93526e+06	5036447	5.20746e+06	4.92548e+06	5.07029e+06	4.50404e+06	4.82995e+06
A8MS85	Transcription elongation factor SPT6 homolog OS=Arabidopsis thaliana OX=3702 GN=SPT6 PE=1 SV=1	cell organization and biogenesis;metabolic process;regulation of biological process	cytosol;nucleus	DNA binding;protein binding;RNA binding	GTB1			1.69483e+08	154889749	1.50918e+08	1.54467e+08	1.58147e+08	1.75149e+08	2.14703e+08	1.72624e+08	171757258	1.97562e+08
Q4VBE8	WD repeat-containing protein 18 OS=Mus musculus OX=10090 GN=Wdr18 PE=1 SV=1	development	cytoplasm;nucleus	protein binding	Wdr18			3.23645e+06	3.86164e+06	4.03185e+06	4.90412e+06	3861492	2.5761e+06	2.33702e+06	3.44214e+06	6.59154e+06	8.57843e+06
Q8K1E6	Alpha-ketoglutarate-dependent dioxygenase alkB homolog 3 OS=Mus musculus OX=10090 GN=Alkbh3 PE=1 SV=1	cell proliferation;metabolic process;regulation of biological process;response to stimulus	cytoplasm;cytosol;mitochondrion;nucleus	catalytic activity;metal ion binding	Alkbh3			1.73697e+07	3.89317e+06	7.0024e+06	9.25123e+06	12958262	8.66249e+06	9.25313e+06	7.0785e+06	1.80927e+07	1.65947e+07
Q6P1G0	HEAT repeat-containing protein 6 OS=Mus musculus OX=10090 GN=Heatr6 PE=1 SV=1			RNA binding	Heatr6			3.73544e+07	2.98046e+07	3.06561e+07	2.79262e+07	4.39219e+07	3.51964e+07	4.75999e+07	3.45492e+07	3.82888e+07	4.49312e+07
O88736	3-keto-steroid reductase OS=Mus musculus OX=10090 GN=Hsd17b7 PE=1 SV=1	metabolic process	endoplasmic reticulum;membrane	catalytic activity;protein binding	Hsd17b7	Steroid biosynthesis; Steroid hormone biosynthesis; Ovarian steroidogenesis; Metabolic pathways	Steroid Biosynthesis	1.1332e+07	7.3228e+06	1.38163e+07	28006406	1.47598e+07	1.78817e+07	1.09464e+07	2.16442e+07	1.88467e+07	1.96127e+07
Q6P4T0	Autophagy-related protein 2 homolog A OS=Mus musculus OX=10090 GN=Atg2a PE=1 SV=2	cell organization and biogenesis;metabolic process	cytosol;membrane;nucleus		Atg2a			1.31411e+07	1.04587e+07	1.21128e+07	8.12195e+06	9.75309e+06	1.33178e+07	1.00312e+07	1.36227e+07	1.10756e+07	1.52795e+07
A2APB8	Targeting protein for Xklp2 OS=Mus musculus OX=10090 GN=Tpx2 PE=1 SV=1	cell death;cell division;cell organization and biogenesis;regulation of biological process	cytoplasm;cytoskeleton;nucleus	protein binding	Tpx2			3.43188e+06	3.1192e+06	3.19475e+06	3.06968e+06	3.60104e+06	3.02717e+06	4.34959e+06	5.28407e+06	4.64454e+06	2.08437e+06
Q9ERF3	WD repeat-containing protein 61 OS=Mus musculus OX=10090 GN=Wdr61 PE=1 SV=1	cell organization and biogenesis;metabolic process;regulation of biological process;response to stimulus	cytoplasm;cytosol;nucleus	protein binding	Wdr61	RNA degradation	PluriNetWork	6.13035e+07	5.58017e+07	5.78811e+07	6.6181e+07	47529551	6.87919e+07	6.49711e+07	5.19611e+07	9.30357e+07	6.20454e+07
Q60676	Serine/threonine-protein phosphatase 5 OS=Mus musculus OX=10090 GN=Ppp5c PE=1 SV=3	cell organization and biogenesis;metabolic process;regulation of biological process;response to stimulus	cytoplasm;cytosol;membrane;nucleus	catalytic activity;metal ion binding;nucleotide binding;protein binding;RNA binding;signal transducer activity	Ppp5c	MAPK signaling pathway	MAPK signaling pathway	633033	355914	294879	0	532631	282440	401432	418555	603045	437401
Q921I9	Exosome complex component RRP41 OS=Mus musculus OX=10090 GN=Exosc4 PE=1 SV=3	defense response;metabolic process;regulation of biological process;response to stimulus	cytoplasm;cytoskeleton;cytosol;nucleus	protein binding;RNA binding	Exosc4	RNA degradation	mRNA processing	7.63792e+06	5.38612e+06	6.83348e+06	5.51682e+06	6.58161e+06	1.04477e+07	5.36258e+06	7.87824e+06	8.71675e+06	5.27904e+06
Q9D0W5	Peptidyl-prolyl cis-trans isomerase-like 1 OS=Mus musculus OX=10090 GN=Ppil1 PE=1 SV=1	metabolic process	spliceosomal complex	catalytic activity	Ppil1	Spliceosome		4.16146e+06	6.70204e+06	4.77705e+06	1.21578e+06	3.87991e+06	2.31719e+06	4.4601e+06	5.52145e+06	7.46774e+06	4.68629e+06
Q9CYG7	Mitochondrial import receptor subunit TOM34 OS=Mus musculus OX=10090 GN=Tomm34 PE=1 SV=1	transport	cytoplasm;cytosol;membrane;mitochondrion;nucleus	protein binding	Tomm34			6.90749e+06	3.71505e+06	2.09918e+06	1.45278e+06	6.07156e+06	6.6499e+06	3.8648e+06	5.02787e+06	4.13665e+06	4.19133e+06
P97823	Acyl-protein thioesterase 1 OS=Mus musculus OX=10090 GN=Lypla1 PE=1 SV=1	metabolic process;regulation of biological process	cytoplasm;cytosol;mitochondrion	catalytic activity	Lypla1	Glycerophospholipid metabolism; Choline metabolism in cancer		3.06899e+07	3.39283e+07	3.01357e+07	2.87229e+07	4.43066e+07	3.81504e+07	4.15589e+07	4.11316e+07	3.65609e+07	4.03738e+07
O35682	Myeloid-associated differentiation marker OS=Mus musculus OX=10090 GN=Myadm PE=1 SV=2	cell organization and biogenesis;regulation of biological process	cytoskeleton;membrane		Myadm			1.1866e+07	1.40302e+07	1.43014e+07	1.16131e+07	16907187	2.18931e+07	1.48149e+07	1.5349e+07	1.74141e+07	1.15035e+07
Q8BNI4	Derlin-2 OS=Mus musculus OX=10090 GN=Derl2 PE=1 SV=2	metabolic process;regulation of biological process;response to stimulus;transport	endoplasmic reticulum;endosome;membrane	catalytic activity	Derl2	Protein processing in endoplasmic reticulum		2.94507e+07	3.67727e+07	2.76841e+07	2.21246e+07	2.58637e+07	4.07696e+07	2.61192e+07	2.73606e+07	3.47242e+07	3.80623e+07
Q62419	Endophilin-A2 OS=Mus musculus OX=10090 GN=Sh3gl1 PE=1 SV=1	cell organization and biogenesis;transport	cytoplasm;endosome;membrane	protein binding	Sh3gl1	Endocytosis		9.24928e+06	6.29029e+06	8.4528e+06	3.45332e+06	8.58283e+06	8.73118e+06	7.2163e+06	1.07178e+07	8.34347e+06	7.36648e+06
Q8K4P0	pre-mRNA 3' end processing protein WDR33 OS=Mus musculus OX=10090 GN=Wdr33 PE=1 SV=1	metabolic process	nucleus	protein binding;RNA binding	Wdr33	mRNA surveillance pathway		1.71029e+07	2.2569e+07	1.62262e+07	18609490	2.35591e+07	2.16068e+07	2.67375e+07	2.73298e+07	1.37534e+07	2.59063e+07
P62305	Small nuclear ribonucleoprotein E OS=Mus musculus OX=10090 GN=Snrpe PE=1 SV=1	cell organization and biogenesis;metabolic process	cytoplasm;cytosol;nucleus;spliceosomal complex	RNA binding	Snrpe	Spliceosome	mRNA processing	1.10923e+08	1.04262e+08	1.06298e+08	8.78057e+07	1.11989e+08	1.09196e+08	1.30026e+08	1.25639e+08	1.20948e+08	1.27125e+08
P00493	Hypoxanthine-guanine phosphoribosyltransferase OS=Mus musculus OX=10090 GN=Hprt1 PE=1 SV=3	cell differentiation;cell organization and biogenesis;cell proliferation;metabolic process;regulation of biological process;response to stimulus	cytoplasm;cytosol	catalytic activity;metal ion binding;nucleotide binding;protein binding	Hprt	Metabolic pathways; Purine metabolism; Drug metabolism - other enzymes	Purine metabolism; Nucleotide Metabolism	1.34263e+06	1.64755e+06	1.27703e+06	1.33955e+06	1.55183e+06	1.18908e+06	1.86613e+06	1.45204e+06	2728451	1.17609e+06
Q8VDL4	ADP-dependent glucokinase OS=Mus musculus OX=10090 GN=Adpgk PE=1 SV=2	metabolic process	endoplasmic reticulum;extracellular;membrane	catalytic activity;metal ion binding	Adpgk	Metabolic pathways; Glycolysis / Gluconeogenesis; Carbon metabolism		357680	439467	254684	307025	298355	371183	348272	385944	496893	344997
Q9DC29	ATP-binding cassette sub-family B member 6, mitochondrial OS=Mus musculus OX=10090 GN=Abcb6 PE=1 SV=1	metabolic process;transport	cytosol;endoplasmic reticulum;endosome;Golgi;membrane;mitochondrion	catalytic activity;nucleotide binding;transporter activity	Abcb6	ABC transporters		4.52072e+07	4.60992e+07	3.35904e+07	4.01721e+07	4.97387e+07	5.22015e+07	5.77897e+07	4.40439e+07	5.73542e+07	4.09117e+07
Q91XE8	Transmembrane protein 205 OS=Mus musculus OX=10090 GN=Tmem205 PE=1 SV=1		membrane		Tmem205			2.06631e+07	1.41633e+07	1.68865e+07	8.31815e+06	2.00033e+07	1.55482e+07	1.82099e+07	1.62409e+07	2.104e+07	2.29564e+07
Q3UJD6	Ubiquitin carboxyl-terminal hydrolase 19 OS=Mus musculus OX=10090 GN=Usp19 PE=1 SV=1	metabolic process;regulation of biological process;response to stimulus	cytosol;endoplasmic reticulum;membrane;nucleus	catalytic activity;metal ion binding;protein binding	Usp19			5.67458e+06	3.22255e+06	5.17243e+06	3.59769e+06	5.58818e+06	2.38549e+06	6.43655e+06	5.21227e+06	5.33625e+06	7.93687e+06
Q91YL2	E3 ubiquitin-protein ligase RNF126 OS=Mus musculus OX=10090 GN=Rnf126 PE=1 SV=1	metabolic process;regulation of biological process;response to stimulus;transport	cytoplasm;cytosol;nucleus	catalytic activity;metal ion binding;protein binding	Rnf126			7.87894e+06	7.0937e+06	7.99579e+06	7.35104e+06	8.22718e+06	9.77504e+06	9.14518e+06	9.1062e+06	8.20632e+06	9.00908e+06
P59326	YTH domain-containing family protein 1 OS=Mus musculus OX=10090 GN=Ythdf1 PE=1 SV=1	regulation of biological process	cytoplasm	RNA binding	Ythdf1			2.23501e+07	2.38549e+07	2.41862e+07	1.76546e+07	2.21566e+07	2.53271e+07	2.82103e+07	2.72844e+07	2.85554e+07	1.99626e+07
P62309	Small nuclear ribonucleoprotein G OS=Mus musculus OX=10090 GN=Snrpg PE=1 SV=1	cell organization and biogenesis;metabolic process	cytoplasm;cytosol;nucleus;spliceosomal complex	RNA binding;structural molecule activity	Snrpg	Spliceosome	mRNA processing	4.04131e+07	2.62174e+07	2.5448e+07	1.67596e+07	3.29027e+07	2.74679e+07	3.48066e+07	2.98539e+07	3.19087e+07	4.22567e+07
P22892	AP-1 complex subunit gamma-1 OS=Mus musculus OX=10090 GN=Ap1g1 PE=1 SV=3	cell organization and biogenesis;regulation of biological process;transport	cytoskeleton;cytosol;endosome;Golgi;membrane	protein binding;transporter activity	Ap1g1	Lysosome		3.13953e+06	0	2.41473e+06	4.05432e+06	2.5719e+06	2.14642e+06	2.8073e+06	3.17747e+06	3.19474e+06	2.96325e+06
Q8BMD8	Calcium-binding mitochondrial carrier protein SCaMC-1 OS=Mus musculus OX=10090 GN=Slc25a24 PE=1 SV=1	regulation of biological process;response to stimulus;transport	membrane;mitochondrion	metal ion binding;protein binding;transporter activity	Slc25a24			4.33188e+07	4.29043e+07	3.5597e+07	3.41384e+07	44954459	4.26222e+07	4.44699e+07	4.78095e+07	4.2359e+07	5.84312e+07
Q9D338	39S ribosomal protein L19, mitochondrial OS=Mus musculus OX=10090 GN=Mrpl19 PE=1 SV=1	metabolic process	membrane;mitochondrion;nucleus;ribosome	structural molecule activity	Mrpl19	Ribosome		1.20328e+07	1.44364e+07	1.41399e+07	1.2113e+07	17418318	1.53418e+07	1.64249e+07	1.47123e+07	1.56847e+07	2.01147e+07
Q6Y5D8	Rho GTPase-activating protein 10 OS=Mus musculus OX=10090 GN=Arhgap10 PE=1 SV=2	cell organization and biogenesis;regulation of biological process;response to stimulus	cytoplasm;cytosol;membrane	enzyme regulator activity;protein binding	Arhgap10	Bacterial invasion of epithelial cells		5.27338e+07	4.25452e+07	4.27953e+07	4.79901e+07	5.44052e+07	5.78312e+07	6.04303e+07	5.43324e+07	5.54484e+07	5.40135e+07
A2A9C3	KICSTOR complex protein SZT2 OS=Mus musculus OX=10090 GN=Szt2 PE=1 SV=1	cell communication;cell organization and biogenesis;regulation of biological process;response to stimulus	membrane;vacuole		Szt2			8.51798e+07	5.80911e+07	6.96155e+07	4.40794e+07	81179482	6.61392e+07	9.07858e+07	7.78233e+07	8.4921e+07	7.68808e+07
Q9CQ56	Vesicle transport protein USE1 OS=Mus musculus OX=10090 GN=Use1 PE=1 SV=1	cell organization and biogenesis;regulation of biological process;transport	endoplasmic reticulum;membrane		Use1	SNARE interactions in vesicular transport		2.13582e+07	2.24394e+07	1.83113e+07	1.90908e+07	3.13085e+07	2.94118e+07	3.05357e+07	3.23855e+07	2.03035e+07	1.91936e+07
Q9JLN9	Serine/threonine-protein kinase mTOR OS=Mus musculus OX=10090 GN=Mtor PE=1 SV=2	cell communication;cell growth;cell organization and biogenesis;metabolic process;regulation of biological process;response to stimulus	cytoplasm;cytosol;endoplasmic reticulum;Golgi;membrane;mitochondrion;nucleus;vacuole	catalytic activity;DNA binding;nucleotide binding;protein binding	Mtor	ErbB signaling pathway; Acute myeloid leukemia; mTOR signaling pathway; Phospholipase D signaling pathway; Type II diabetes mellitus; MicroRNAs in cancer; Jak-STAT signaling pathway; Insulin signaling pathway; Breast cancer; Insulin resistance; Longevity regulating pathway; Proteoglycans in cancer; Thyroid hormone signaling pathway; HIF-1 signaling pathway; Pathways in cancer; Adipocytokine signa…	ErbB signaling pathway; MicroRNAs in Cardiomyocyte Hypertrophy; PluriNetWork; SREBF and miR33 in cholesterol and lipid homeostasis; Focal Adhesion-PI3K-Akt-mTOR-signaling pathway; ESC Pluripotency Pathways; Factors and pathways affecting insulin-like growth factor (IGF1)-Akt signaling; Dysregulated miRNA Targeting in Insulin/PI3K-AKT Signaling; IL-2 Signaling Pathway; Alpha6-Beta4 Integrin Signal…	1.82446e+07	2.78191e+07	2.14368e+07	3.08153e+07	2.61263e+07	2.87838e+07	2.8225e+07	2.45231e+07	3.41426e+07	3.01059e+07
O08599	Syntaxin-binding protein 1 OS=Mus musculus OX=10090 GN=Stxbp1 PE=1 SV=2	cell communication;cell organization and biogenesis;regulation of biological process;response to stimulus;transport	cytoplasm;cytoskeleton;cytosol;membrane;mitochondrion;nucleus	protein binding;RNA binding	Stxbp1	Synaptic vesicle cycle	EGFR1 Signaling Pathway; Insulin Signaling	1.11744e+06	1.29339e+06	1.26436e+06	1.37394e+06	1.3371e+06	1.36989e+06	1.4154e+06	1.31902e+06	1.96505e+06	1.40894e+06
P56477	Interferon regulatory factor 5 OS=Mus musculus OX=10090 GN=Irf5 PE=1 SV=1	defense response;metabolic process;regulation of biological process;response to stimulus	cytoplasm;nucleus	DNA binding;protein binding	Irf5	Toll-like receptor signaling pathway	Apoptosis	1.01878e+06	417143	491585	614871	806632	670118	792668	748227	761187	948941
P22907	Porphobilinogen deaminase OS=Mus musculus OX=10090 GN=Hmbs PE=1 SV=2	metabolic process	chromosome;cytoplasm;nucleus	catalytic activity	Hmbs	Metabolic pathways; Porphyrin and chlorophyll metabolism	Heme Biosynthesis	7.2491e+06	6.55134e+06	7.577e+06	3.77571e+06	7.79747e+06	7.69252e+06	8.00887e+06	7.68876e+06	7.63927e+06	7.50384e+06
O70496	H(+)/Cl(-) exchange transporter 7 OS=Mus musculus OX=10090 GN=Clcn7 PE=1 SV=1	response to stimulus;transport	membrane;vacuole	nucleotide binding;protein binding;transporter activity	Clcn7			7.16316e+07	6.53949e+07	7.76948e+07	7.29843e+07	80635013	8.04356e+07	94235918	8.8653e+07	7.96985e+07	8.76126e+07
A2AIV8	Caspase recruitment domain-containing protein 9 OS=Mus musculus OX=10090 GN=Card9 PE=1 SV=1	defense response;regulation of biological process;response to stimulus	cytoplasm;cytosol	protein binding	Card9	NOD-like receptor signaling pathway; Tuberculosis		9.16446e+06	5.54104e+06	9.40419e+06	9.70163e+06	1.04501e+07	9.4557e+06	9.40125e+06	9.34592e+06	9.19053e+06	1.43499e+07
Q9CZ42	ATP-dependent (S)-NAD(P)H-hydrate dehydratase OS=Mus musculus OX=10090 GN=Naxd PE=1 SV=1		cytosol;endoplasmic reticulum;mitochondrion	catalytic activity;nucleotide binding	Carkd; Naxd			7.70126e+07	8.73789e+07	7.76354e+07	6.955e+07	8.20664e+07	9.72664e+07	9.93445e+07	9.3523e+07	8.31267e+07	8.68269e+07
P70296	Phosphatidylethanolamine-binding protein 1 OS=Mus musculus OX=10090 GN=Pebp1 PE=1 SV=3	metabolic process;regulation of biological process;response to stimulus	cell surface;cytoplasm;endoplasmic reticulum;Golgi;membrane;mitochondrion;nucleus	enzyme regulator activity;nucleotide binding;protein binding;RNA binding	Pebp1		TNF-alpha NF-kB Signaling Pathway; EGFR1 Signaling Pathway	6.91247e+06	6.10427e+06	6.67933e+06	3.54115e+06	9.02424e+06	6.98106e+06	9.70263e+06	8.05354e+06	6.81423e+06	6.14392e+06
P68181	cAMP-dependent protein kinase catalytic subunit beta OS=Mus musculus OX=10090 GN=Prkacb PE=1 SV=2	metabolic process;regulation of biological process;response to stimulus	cytoplasm;cytosol;membrane;nucleus	catalytic activity;metal ion binding;nucleotide binding;protein binding	Prkacb	Oxytocin signaling pathway; Morphine addiction; Wnt signaling pathway; Cholinergic synapse; Retrograde endocannabinoid signaling; MAPK signaling pathway; Dopaminergic synapse; Progesterone-mediated oocyte maturation; Ras signaling pathway; GABAergic synapse; Regulation of lipolysis in adipocytes; Ovarian steroidogenesis; Insulin signaling pathway; Long-term potentiation; Epstein-Barr virus infect…	Chemokine signaling pathway; G Protein Signaling Pathways; Myometrial Relaxation and Contraction Pathways; Calcium Regulation in the Cardiac Cell	1.16535e+08	1.00458e+08	1.10465e+08	1.2726e+08	1.08477e+08	2.01814e+08	1.03837e+08	1.10518e+08	1.05404e+08	1.3646e+08
P28798	Progranulin OS=Mus musculus OX=10090 GN=Grn PE=1 SV=2	cell proliferation;regulation of biological process;response to stimulus;transport	endoplasmic reticulum;endosome;extracellular;mitochondrion;vacuole	protein binding;RNA binding	Grn			4.28207e+06	3.25238e+06	3.16968e+06	2.01589e+06	3.34232e+06	3.1252e+06	4.2365e+06	3.18113e+06	4.06004e+06	4.16008e+06
Q8K4F6	Probable 28S rRNA (cytosine-C(5))-methyltransferase OS=Mus musculus OX=10090 GN=Nsun5 PE=2 SV=2	metabolic process	nucleus	catalytic activity;RNA binding	Nsun5			1.01431e+08	9.06455e+07	1.17901e+08	9.39798e+07	1.04053e+08	1.26607e+08	1.2796e+08	1.13151e+08	1.21434e+08	104245224
Q9Z0F8	Disintegrin and metalloproteinase domain-containing protein 17 OS=Mus musculus OX=10090 GN=Adam17 PE=1 SV=3	cell differentiation;cellular component movement;defense response;metabolic process;regulation of biological process;response to stimulus	cell surface;cytoplasm;cytoskeleton;cytosol;extracellular;membrane	catalytic activity;metal ion binding;protein binding	Adam17	Notch signaling pathway; Alzheimer's disease	Alzheimers Disease; Delta-Notch Signaling Pathway; Notch Signaling Pathway	3.64717e+07	3.08054e+07	3.02946e+07	3.7138e+07	2.56721e+07	2.81117e+07	3.4103e+07	4.50656e+07	4.22355e+07	3.77498e+07
Q8K3W0	BRISC and BRCA1-A complex member 2 OS=Mus musculus OX=10090 GN=Babam2 PE=1 SV=2	cell death;cell division;cell organization and biogenesis;metabolic process;regulation of biological process;response to stimulus	cytoplasm;cytosol;nucleus	protein binding	Bre; Babam2	Homologous recombination		1.76831e+07	2.01598e+07	2.4413e+07	1.75422e+07	2.99408e+07	2.84444e+07	2.6765e+07	2.40082e+07	2.10513e+07	2.7834e+07
Q9JKN1	Zinc transporter 7 OS=Mus musculus OX=10090 GN=Slc30a7 PE=1 SV=1	regulation of biological process;response to stimulus;transport	cytoplasm;Golgi;membrane	metal ion binding;transporter activity	Slc30a7			2.59134e+07	2.25003e+07	2.50109e+07	2.17334e+07	3.18608e+07	3.45459e+07	3.16779e+07	2.80191e+07	2.60539e+07	2.79263e+07
Q8BVQ5	Protein phosphatase methylesterase 1 OS=Mus musculus OX=10090 GN=Ppme1 PE=1 SV=5	metabolic process;regulation of biological process		catalytic activity;enzyme regulator activity;protein binding	Ppme1			7.5378e+06	10903277	8.87244e+06	1.08116e+07	9.27282e+06	9.06271e+06	1.02646e+07	1.34112e+07	1.18794e+07	1.06618e+07
Q8BTS4	Nuclear pore complex protein Nup54 OS=Mus musculus OX=10090 GN=Nup54 PE=1 SV=1	cell organization and biogenesis;regulation of biological process;transport	membrane;nucleus	structural molecule activity;transporter activity	Nup54	RNA transport		7.05696e+07	6.43192e+07	6.92071e+07	6.449e+07	7.36922e+07	9.21365e+07	7.89596e+07	6.81641e+07	6.43403e+07	9.54541e+07
Q62312	TGF-beta receptor type-2 OS=Mus musculus OX=10090 GN=Tgfbr2 PE=1 SV=1	cell death;cell differentiation;cell growth;metabolic process;regulation of biological process;response to stimulus;transport	cell surface;cytoplasm;cytosol;membrane	catalytic activity;metal ion binding;nucleotide binding;protein binding;receptor activity;signal transducer activity	Tgfbr2	FoxO signaling pathway; AGE-RAGE signaling pathway in diabetic complications; Endocytosis; Chagas disease (American trypanosomiasis); MAPK signaling pathway; Hippo signaling pathway; HTLV-I infection; Osteoclast differentiation; Adherens junction; Transcriptional misregulation in cancer; TGF-beta signaling pathway; Pathways in cancer; Pancreatic cancer; Colorectal cancer; Cytokine-cytokine recept…	TGF Beta Signaling Pathway; MAPK signaling pathway	7.42979e+07	7.5805e+07	5.42894e+07	6.70563e+07	7.10633e+07	8.20822e+07	7.42407e+07	7.20194e+07	9.70497e+07	7.38951e+07
Q8BKZ9	Pyruvate dehydrogenase protein X component, mitochondrial OS=Mus musculus OX=10090 GN=Pdhx PE=1 SV=1	metabolic process	mitochondrion;organelle lumen	catalytic activity	Pdhx	Metabolic pathways	Glycolysis and Gluconeogenesis; TCA Cycle	2.26947e+07	2.05163e+07	1.81064e+07	1.29117e+07	20782069	1.86856e+07	2.10647e+07	2.68089e+07	1.9297e+07	2.48924e+07
P42669	Transcriptional activator protein Pur-alpha OS=Mus musculus OX=10090 GN=Pura PE=1 SV=1	cell death;cell differentiation;cell proliferation;metabolic process;regulation of biological process	cytoplasm;nucleus	DNA binding;protein binding;RNA binding;translation regulator activity	Pura		Exercise-induced Circadian Regulation; Exercise-induced Circadian Regulation	8.512e+06	2.27508e+07	2.34833e+07	5.11005e+06	2.37023e+07	2.48612e+07	2.26104e+07	2.42322e+07	1.92212e+07	6.42901e+06
Q7TSS2	Ubiquitin-conjugating enzyme E2 Q1 OS=Mus musculus OX=10090 GN=Ube2q1 PE=1 SV=2	metabolic process;response to stimulus;transport	cytoplasm;cytosol;nucleus	catalytic activity;nucleotide binding	Ube2q1	Ubiquitin mediated proteolysis		8.21847e+06	1.03676e+07	7.89169e+06	9.69261e+06	1.34687e+07	1.04687e+07	1.30211e+07	1.06404e+07	1.14273e+07	1.22726e+07
A6X919	Probable C-mannosyltransferase DPY19L1 OS=Mus musculus OX=10090 GN=Dpy19l1 PE=1 SV=1	metabolic process	membrane	catalytic activity	Dpy19l1			156042051	1.48499e+08	1.69444e+08	1.47706e+08	1.58677e+08	1.65428e+08	1.70888e+08	1.94403e+08	185111607	1.93099e+08
Q9WVG6	Histone-arginine methyltransferase CARM1 OS=Mus musculus OX=10090 GN=Carm1 PE=1 SV=2	cell organization and biogenesis;metabolic process;regulation of biological process;response to stimulus	cytoplasm;cytosol;nucleus	catalytic activity;DNA binding;protein binding	Carm1	Endocrine resistance		2.28852e+07	2.20461e+07	18098772	2.43857e+07	1.95422e+07	2.34151e+07	2.5855e+07	2.12253e+07	2.57771e+07	2.82613e+07
Q9Z1S0	Mitotic checkpoint serine/threonine-protein kinase BUB1 beta OS=Mus musculus OX=10090 GN=Bub1b PE=1 SV=2	cell death;cell division;cell organization and biogenesis;metabolic process;regulation of biological process	chromosome;cytoplasm;cytosol;nucleus	catalytic activity;nucleotide binding;protein binding	Bub1b	HTLV-I infection; Cell cycle		7.75087e+06	8.25741e+06	9.37453e+06	6.77241e+06	1.30212e+07	8.50371e+06	1.29819e+07	9.89709e+06	1.03038e+07	1.09073e+07
P03940	Steroid 21-hydroxylase OS=Mus musculus OX=10090 GN=Cyp21 PE=2 SV=3	metabolic process	endoplasmic reticulum;membrane	catalytic activity;metal ion binding	Cyp21a1	Steroid hormone biosynthesis; Metabolic pathways; Aldosterone synthesis and secretion	Metapathway biotransformation; Glucocorticoid & Mineralcorticoid Metabolism	2.18981e+08	207384151	1.80578e+08	1.27362e+08	1.895e+08	2.51616e+08	2.01129e+08	2.19719e+08	1.91272e+08	211741509
Q99N87	28S ribosomal protein S5, mitochondrial OS=Mus musculus OX=10090 GN=Mrps5 PE=1 SV=1	metabolic process	mitochondrion;ribosome	RNA binding;structural molecule activity	Mrps5	Ribosome		3.78745e+07	4.02299e+07	3.41535e+07	4.61465e+07	29093606	3.93531e+07	4.4506e+07	3.54204e+07	4.90487e+07	4.99526e+07
Q8R123	FAD synthase OS=Mus musculus OX=10090 GN=Flad1 PE=1 SV=1	metabolic process	cytoplasm;cytosol;membrane	catalytic activity;nucleotide binding	Flad1	Metabolic pathways; Riboflavin metabolism		1.71559e+08	1.44866e+08	1.4176e+08	1.28863e+08	1.46404e+08	2.20678e+08	1.80998e+08	1.431e+08	128266684	1.8069e+08
Q3TC46	Protein PAT1 homolog 1 OS=Mus musculus OX=10090 GN=Patl1 PE=1 SV=2	cell organization and biogenesis;metabolic process;regulation of biological process	cytoplasm;nucleus	RNA binding;translation regulator activity	Patl1	RNA degradation		3.38811e+07	2.19254e+07	1.84333e+07	2.18566e+07	18501171	1.54974e+07	2.55565e+07	3.05375e+07	2.92039e+07	3.25653e+07
Q91YU8	Suppressor of SWI4 1 homolog OS=Mus musculus OX=10090 GN=Ppan PE=1 SV=2	cell organization and biogenesis;regulation of biological process	nucleus	RNA binding	Ppan			8.27274e+06	1.34378e+07	1.11919e+07	3.86438e+06	9.2054e+06	6.16439e+06	9.16325e+06	1.31648e+07	1.46637e+07	1.03259e+07
Q9CQE6	Histone chaperone ASF1A OS=Mus musculus OX=10090 GN=Asf1a PE=1 SV=1	cell differentiation;cell organization and biogenesis;metabolic process;regulation of biological process;response to stimulus	nucleus	protein binding	Asf1a			1.52491e+07	9.69172e+06	1.06174e+07	4.26022e+06	15961736	1.0317e+07	1.59009e+07	1.22624e+07	9.85545e+06	1.65433e+07
Q9CPS7	RNA-binding protein PNO1 OS=Mus musculus OX=10090 GN=Pno1 PE=1 SV=1		nucleus	RNA binding	Pno1			5.01586e+06	4.28454e+06	7.0078e+06	5.22107e+06	8.81855e+06	1.07863e+07	5.80547e+06	6.0756e+06	7.34954e+06	5.27373e+06
Q9CQI3	Glia maturation factor beta OS=Mus musculus OX=10090 GN=Gmfb PE=1 SV=3	regulation of biological process;response to stimulus		protein binding	Gmfb			2.22816e+07	2.77128e+07	2.55045e+07	3.06999e+07	2.96238e+07	3.80103e+07	2.91254e+07	2.65209e+07	3.35589e+07	3.07211e+07
Q6PAR5	GTPase-activating protein and VPS9 domain-containing protein 1 OS=Mus musculus OX=10090 GN=Gapvd1 PE=1 SV=2	regulation of biological process;response to stimulus;transport	cytosol;endosome;membrane	enzyme regulator activity;protein binding	Gapvd1			1.80087e+06	4.32107e+06	4.08468e+06	2.52463e+06	3508071	4.53244e+06	4.44959e+06	4.05088e+06	5.37459e+06	458410
Q8BVI4	Dihydropteridine reductase OS=Mus musculus OX=10090 GN=Qdpr PE=1 SV=2	metabolic process;response to stimulus	cytoplasm;cytosol;mitochondrion	catalytic activity;nucleotide binding;protein binding	Qdpr; LOC102643271	Metabolic pathways; Folate biosynthesis		3.41409e+06	4.24859e+06	4.03453e+06	3.64462e+06	5.44114e+06	5.27939e+06	5.4055e+06	4.00037e+06	6.05356e+06	3.39346e+06
Q925N2	Sideroflexin-2 OS=Mus musculus OX=10090 GN=Sfxn2 PE=1 SV=1	transport	membrane;mitochondrion	transporter activity	Sfxn2			7.7598e+07	9.10168e+07	7.54323e+07	7.04217e+07	8.50924e+07	8.58415e+07	9.81639e+07	7.76604e+07	9.89318e+07	103091491
Q8K114	Integrator complex subunit 9 OS=Mus musculus OX=10090 GN=Ints9 PE=1 SV=1	metabolic process	cytosol;nucleus		Ints9			2.41456e+08	2.30039e+08	224734603	2.64588e+08	259541480	344684316	2.89258e+08	2.88976e+08	2.69214e+08	2.24029e+08
Q9CYA6	Zinc finger CCHC domain-containing protein 8 OS=Mus musculus OX=10090 GN=Zcchc8 PE=1 SV=3	metabolic process	nucleus;spliceosomal complex	metal ion binding;RNA binding	Zcchc8			6.6561e+06	1.57947e+07	1.87561e+07	7.31096e+06	1.53512e+07	13993187	1.67206e+07	1.38644e+07	1.37414e+07	1.57879e+07
P50096	Inosine-5'-monophosphate dehydrogenase 1 OS=Mus musculus OX=10090 GN=Impdh1 PE=1 SV=2	cell proliferation;metabolic process	cytoplasm;cytosol;nucleus	catalytic activity;DNA binding;metal ion binding	Impdh1	Metabolic pathways; Purine metabolism; Drug metabolism - other enzymes	Purine metabolism; Nucleotide Metabolism	1.89422e+07	1.38482e+07	1.62201e+07	5.47911e+06	1.6783e+07	1.87523e+07	1.49013e+07	1.93212e+07	1.47661e+07	1.49516e+07
Q3UA37	Glutamine-rich protein 1 OS=Mus musculus OX=10090 GN=Qrich1 PE=1 SV=1	cell organization and biogenesis;development;regulation of biological process	cytoplasm	DNA binding	Qrich1			7.05925e+06	7.03852e+06	3.44981e+06	4.33842e+06	8.73488e+06	7.38601e+06	5.91025e+06	7.44763e+06	7.39896e+06	7.35861e+06
E9QAT4	Protein transport protein Sec16A OS=Mus musculus OX=10090 GN=Sec16a PE=1 SV=1	cell organization and biogenesis;transport	cytosol;endoplasmic reticulum;Golgi;membrane	catalytic activity	Sec16a			2.5846e+06	9.84326e+06	7.0944e+06	8.04247e+06	7.26265e+06	8.40966e+06	7.53901e+06	7.0317e+06	9.06673e+06	8.31922e+06
O70551	SRSF protein kinase 1 OS=Mus musculus OX=10090 GN=Srpk1 PE=1 SV=2	cell differentiation;cell organization and biogenesis;metabolic process;regulation of biological process;response to stimulus	cytoplasm;cytosol;endoplasmic reticulum;membrane;nucleus	catalytic activity;metal ion binding;nucleotide binding;protein binding;RNA binding	Srpk1	Herpes simplex infection	mRNA processing	1.06555e+06	2.24867e+06	1.5405e+06	1.4133e+06	2.60165e+06	1.65488e+06	2.51431e+06	1.80946e+06	2.52852e+06	1.77018e+06
P47791	Glutathione reductase, mitochondrial OS=Mus musculus OX=10090 GN=Gsr PE=1 SV=3	cellular homeostasis;metabolic process;regulation of biological process	cytoplasm;cytosol;mitochondrion	antioxidant activity;catalytic activity;nucleotide binding;protein binding	Gsr	Glutathione metabolism; Thyroid hormone synthesis	Metapathway biotransformation; Selenium Micronutrient Network; Folic Acid Network; Glutathione metabolism; One carbon metabolism and related pathways; Oxidative Stress; Glutathione and one carbon metabolism	561968	609354	641951	0	1045678	0	839272	786387	721941	962125
Q9EQQ9	Protein O-GlcNAcase OS=Mus musculus OX=10090 GN=Oga PE=1 SV=2	cell death;cell organization and biogenesis;metabolic process;regulation of biological process;transport	cytoplasm;cytosol;membrane;mitochondrion;nucleus	catalytic activity;protein binding	Mgea5	Insulin resistance		3.24665e+07	2.29524e+07	2.71464e+07	1.99539e+07	2.14195e+07	3.15835e+07	2.82128e+07	2.51565e+07	2.45712e+07	3.38828e+07
Q9D0F1	Kinetochore protein NDC80 homolog OS=Mus musculus OX=10090 GN=Ndc80 PE=1 SV=1	cell division;cell organization and biogenesis;metabolic process;regulation of biological process	chromosome;membrane;nucleus	protein binding;structural molecule activity	Ndc80			1.34129e+08	1.40519e+08	1.28584e+08	1.51325e+08	1.39177e+08	1.46037e+08	160738868	1.50739e+08	1.83929e+08	160697532
Q8BQ30	Phostensin OS=Mus musculus OX=10090 GN=Ppp1r18 PE=1 SV=1		cytoplasm;cytoskeleton	protein binding	Ppp1r18		TYROBP Causal Network	1.6318e+08	1.47826e+08	1.65224e+08	1.03972e+08	1.5573e+08	1.66639e+08	1.75399e+08	1.54396e+08	1.55511e+08	1.98779e+08
Q9D706	RNA polymerase II-associated protein 3 OS=Mus musculus OX=10090 GN=Rpap3 PE=1 SV=1			protein binding	Rpap3			1.12529e+07	1.26164e+07	1.35003e+07	1.11352e+07	1.2865e+07	1.27749e+07	1.6939e+07	1.66906e+07	1.43924e+07	1.01425e+07
P35991	Tyrosine-protein kinase BTK OS=Mus musculus OX=10090 GN=Btk PE=1 SV=4	cell death;defense response;metabolic process;regulation of biological process;response to stimulus;transport	cytoplasm;cytosol;membrane;nucleus;vacuole	catalytic activity;metal ion binding;nucleotide binding;protein binding	Btk	Primary immunodeficiency; Platelet activation; Osteoclast differentiation; B cell receptor signaling pathway; NF-kappa B signaling pathway; Fc epsilon RI signaling pathway	IL-5 Signaling Pathway; IL-6 signaling Pathway; Kit Receptor Signaling Pathway	662130	598505	723619	661420	902793	559631	873433	730609	1.04149e+06	894218
Q9LRT1	Probably inactive leucine-rich repeat receptor-like protein kinase At3g28040 OS=Arabidopsis thaliana OX=3702 GN=At3g28040 PE=1 SV=1	metabolic process;regulation of biological process;response to stimulus	membrane	catalytic activity;nucleotide binding;protein binding	AT3G28040			1.48797e+08	1.54513e+08	1.4667e+08	1.33736e+08	163742440	1.61499e+08	1.83777e+08	1.85815e+08	1.68807e+08	1.63514e+08
P55264	Adenosine kinase OS=Mus musculus OX=10090 GN=Adk PE=1 SV=2	cell proliferation;metabolic process;regulation of biological process	cytoplasm;cytosol;nucleus	catalytic activity;metal ion binding;nucleotide binding;RNA binding	Adk	Metabolic pathways; Purine metabolism	Purine metabolism	1.46584e+06	1.64966e+06	1.44952e+06	1.4879e+06	1.92639e+06	1.73512e+06	2.26399e+06	1.53615e+06	1.72196e+06	1.95959e+06
P57080	Ubiquitin carboxyl-terminal hydrolase 25 OS=Mus musculus OX=10090 GN=Usp25 PE=1 SV=2	metabolic process	cytoplasm;cytosol;endoplasmic reticulum;nucleus;proteasome	catalytic activity;protein binding	Usp25			1.17076e+07	1.45514e+07	1.46377e+07	7.47787e+06	1.75687e+07	1.35664e+07	1.4832e+07	1.73813e+07	1.23727e+07	1.80027e+07
O08992	Syntenin-1 OS=Mus musculus OX=10090 GN=Sdcbp PE=1 SV=1	cell communication;cell organization and biogenesis;regulation of biological process;response to stimulus	cytoplasm;cytoskeleton;cytosol;endoplasmic reticulum;extracellular;membrane;nucleus	protein binding	Sdcbp		IL-5 Signaling Pathway	5.73889e+06	1.18692e+07	7.01119e+06	3.04855e+06	5.22341e+06	4.94178e+06	9.38851e+06	9.72656e+06	6.29373e+06	7.60394e+06
Q8BXN9	Transmembrane protein 87A OS=Mus musculus OX=10090 GN=Tmem87a PE=1 SV=1	transport	cytosol;Golgi;membrane		Tmem87a			1.32784e+07	7.87e+06	8.06805e+06	8.56567e+06	7.72772e+06	1.00613e+07	1.11926e+07	1.05423e+07	1.03787e+07	1.03154e+07
O54786	DNA fragmentation factor subunit alpha OS=Mus musculus OX=10090 GN=Dffa PE=1 SV=2	cell death;metabolic process;regulation of biological process	cytoplasm;cytosol;membrane;nucleus	enzyme regulator activity;protein binding	Dffa	Apoptosis	Apoptosis; PluriNetWork; FAS pathway and Stress induction of HSP regulation	2.8434e+07	4.9454e+07	4.54845e+07	1.40512e+07	2.31894e+07	4.10849e+07	2.22895e+07	3.38419e+07	4.69892e+07	4.09843e+07
O70293	G protein-coupled receptor kinase 6 OS=Mus musculus OX=10090 GN=Grk6 PE=1 SV=1	metabolic process;regulation of biological process;response to stimulus	cytosol;membrane	catalytic activity;nucleotide binding;protein binding	Grk6	Endocytosis; Morphine addiction; Chemokine signaling pathway	Chemokine signaling pathway; Myometrial Relaxation and Contraction Pathways; Calcium Regulation in the Cardiac Cell	22898829	2.77468e+07	2.52257e+07	2.21915e+07	31513021	2.45366e+07	3.51851e+07	3.21343e+07	3.09214e+07	2.66174e+07
Q99ME2	WD repeat-containing protein 6 OS=Mus musculus OX=10090 GN=Wdr6 PE=1 SV=1	regulation of biological process	cytoplasm;cytosol;membrane	protein binding;RNA binding	Wdr6			3.84942e+07	3.52054e+07	3.44224e+07	2.50821e+07	35486267	4.27536e+07	3.48698e+07	4.06759e+07	4.07475e+07	3.54434e+07
Q9EQC5	N-terminal kinase-like protein OS=Mus musculus OX=10090 GN=Scyl1 PE=1 SV=1	metabolic process;transport	cytoplasm;cytoskeleton;cytosol;Golgi;membrane	catalytic activity;nucleotide binding;protein binding	Scyl1			2.46543e+07	2.11633e+07	2.40966e+07	2.64235e+07	3.45175e+07	2.86175e+07	3.4939e+07	3.33789e+07	2.77618e+07	2.61453e+07
P52332	Tyrosine-protein kinase JAK1 OS=Mus musculus OX=10090 GN=Jak1 PE=1 SV=1	cell differentiation;cellular component movement;defense response;metabolic process;regulation of biological process;response to stimulus	cytoplasm;cytoskeleton;cytosol;membrane;nucleus	catalytic activity;metal ion binding;nucleotide binding;protein binding	Jak1		IL-9 Signaling Pathway; TGF Beta Signaling Pathway; Type II interferon signaling (IFNG); IL-5 Signaling Pathway; PluriNetWork; Focal Adhesion-PI3K-Akt-mTOR-signaling pathway; IL-7 Signaling Pathway; ESC Pluripotency Pathways; IL-3 Signaling Pathway; IL-6 signaling Pathway; IL-2 Signaling Pathway; EGFR1 Signaling Pathway	1.01583e+07	765530	6.00888e+06	8.53448e+06	5.64037e+06	5.79879e+06	7.96258e+06	7.82414e+06	8.69012e+06	5.57155e+06
Q9WTK3	Glycosylphosphatidylinositol anchor attachment 1 protein OS=Mus musculus OX=10090 GN=Gpaa1 PE=1 SV=3	metabolic process	endoplasmic reticulum;membrane	catalytic activity	Gpaa1	Glycosylphosphatidylinositol (GPI)-anchor biosynthesis; Metabolic pathways		8.34559e+07	7.92462e+07	8.00559e+07	6.10213e+07	8.89611e+07	9.13032e+07	9.20642e+07	9.4612e+07	9.58227e+07	7.86757e+07
P20491	High affinity immunoglobulin epsilon receptor subunit gamma OS=Mus musculus OX=10090 GN=Fcer1g PE=1 SV=1	cell differentiation;cell organization and biogenesis;cellular component movement;defense response;metabolic process;regulation of biological process;response to stimulus;transport	cell surface;membrane	protein binding;receptor activity;signal transducer activity	Fcer1g	Phospholipase D signaling pathway; Platelet activation; Tuberculosis; Sphingolipid signaling pathway; Natural killer cell mediated cytotoxicity; Fc epsilon RI signaling pathway; Asthma	Microglia Pathogen Phagocytosis Pathway	2.98022e+06	2.45626e+06	2.46051e+06	1.96778e+06	2.98485e+06	3.79649e+06	2.12615e+06	3.26296e+06	3.11858e+06	2.49597e+06
O88286	Protein Wiz OS=Mus musculus OX=10090 GN=Wiz PE=1 SV=2	cell organization and biogenesis;regulation of biological process	nucleus	metal ion binding;protein binding	Wiz			3.72072e+06	3.6131e+06	3.36178e+06	2.56285e+06	3.39692e+06	3.0593e+06	4.81704e+06	3.43651e+06	4.1646e+06	3.68931e+06
Q99P69	Kinetochore protein Nuf2 OS=Mus musculus OX=10090 GN=Nuf2 PE=1 SV=2	cell division;cell organization and biogenesis	chromosome;membrane;nucleus		Nuf2			9.37309e+08	1130814597	1043952286	9.8163e+08	1037164706	1378030152	1189123439	1101891638	1111024310	1123636724
O88983	Syntaxin-8 OS=Mus musculus OX=10090 GN=Stx8 PE=1 SV=1	cell organization and biogenesis;regulation of biological process;transport	cytosol;endosome;membrane	protein binding	Stx8	SNARE interactions in vesicular transport		5.40112e+07	6.16261e+07	5.84254e+07	6.0485e+07	8.43673e+07	7.38535e+07	7.36244e+07	7.86881e+07	6.61995e+07	7.44757e+07
P58044	Isopentenyl-diphosphate Delta-isomerase 1 OS=Mus musculus OX=10090 GN=Idi1 PE=1 SV=1	metabolic process;response to stimulus	mitochondrion	catalytic activity;metal ion binding	Idi1; LOC102635781; Gm38481	Metabolic pathways; Terpenoid backbone biosynthesis	Cholesterol Biosynthesis; Exercise-induced Circadian Regulation; Exercise-induced Circadian Regulation	4.59818e+06	5.93813e+06	5.49621e+06	6.45375e+06	6.28818e+06	5.92177e+06	6.47318e+06	8.85985e+06	6.2384e+06	5.58992e+06
Q9ERG2	Striatin-3 OS=Mus musculus OX=10090 GN=Strn3 PE=1 SV=1	regulation of biological process;response to stimulus	cytoplasm;Golgi;membrane;nucleus	protein binding	Strn3			1.17344e+07	1.15928e+07	1.09498e+07	8.76791e+06	1.02311e+07	1.20185e+07	1.52155e+07	1.30095e+07	1.14123e+07	9.5884e+06
Q80U78	Pumilio homolog 1 OS=Mus musculus OX=10090 GN=Pum1 PE=1 SV=2	cell differentiation;metabolic process;regulation of biological process;response to stimulus	cytoplasm;cytosol;nucleus	RNA binding	Pum1		mRNA processing	1.19548e+07	8.04867e+06	8.01634e+06	1.66591e+07	8.87327e+06	1.30471e+07	1.21308e+07	1.19727e+07	1.1341e+07	1.30524e+07
Q9Z248	Zinc finger protein AEBP2 OS=Mus musculus OX=10090 GN=Aebp2 PE=1 SV=2	cell organization and biogenesis;metabolic process;regulation of biological process	nucleus	DNA binding;metal ion binding	Aebp2			8.86924e+06	1.14425e+07	1.16493e+07	1.17937e+07	1.38139e+07	9.25033e+06	1.44964e+07	1.14216e+07	1.57988e+07	1.51903e+07
Q99J99	3-mercaptopyruvate sulfurtransferase OS=Mus musculus OX=10090 GN=Mpst PE=1 SV=4							2.55135e+06	5.07471e+06	5.72292e+06	7.0454e+06	5.4548e+06	6.59125e+06	7.07492e+06	5.97094e+06	5.44848e+06	4.61826e+06
Q8R5L3	Vam6/Vps39-like protein OS=Mus musculus OX=10090 GN=Vps39 PE=1 SV=1	cell organization and biogenesis;metabolic process;transport	cytoplasm;endosome;membrane;vacuole	protein binding	Vps39			4.24915e+07	3.83875e+07	3.60477e+07	3.80938e+07	4.14413e+07	4.38922e+07	3.70682e+07	4.85823e+07	4.38389e+07	5.23378e+07
Q3TEA8	Heterochromatin protein 1-binding protein 3 OS=Mus musculus OX=10090 GN=Hp1bp3 PE=1 SV=1	cell organization and biogenesis;regulation of biological process;response to stimulus	chromosome;nucleus	DNA binding;protein binding	Hp1bp3			837718	792404	604768	890798	1.19019e+06	751335	1.09849e+06	884823	1.09654e+06	1.12674e+06
Q9D902	General transcription factor IIE subunit 2 OS=Mus musculus OX=10090 GN=Gtf2e2 PE=1 SV=2	metabolic process;regulation of biological process	cytosol;nucleus	DNA binding;protein binding;RNA binding	Gtf2e2	Basal transcription factors; Epstein-Barr virus infection; Viral carcinogenesis	Estrogen signaling; Eukaryotic Transcription Initiation	6.72665e+07	6.98907e+07	8.73431e+07	4.98364e+07	7.85285e+07	8.50016e+07	8.52475e+07	8.68055e+07	7.50109e+07	7.32887e+07
Q8CGC6	RNA-binding protein 28 OS=Mus musculus OX=10090 GN=Rbm28 PE=1 SV=4	metabolic process	nucleus;spliceosomal complex	RNA binding	Rbm28	Ribosome biogenesis in eukaryotes	mRNA processing	139971	151501	104709	127542	169258	118560	164146	143286	197309	172481
Q9DCZ1	GMP reductase 1 OS=Mus musculus OX=10090 GN=Gmpr PE=1 SV=1	metabolic process		catalytic activity;metal ion binding	Gmpr	Purine metabolism	Purine metabolism	4.93892e+07	4.83602e+07	3.31506e+07	4.42462e+07	4.7764e+07	5.97799e+07	4.26996e+07	5.89977e+07	4.91999e+07	4.527e+07
Q64475	Histone H2B type 1-B OS=Mus musculus OX=10090 GN=Hist1h2bb PE=1 SV=3	cell organization and biogenesis	chromosome;cytosol;nucleus	DNA binding;protein binding	Hist1h2bb	Alcoholism; Systemic lupus erythematosus; Viral carcinogenesis		1.78295e+06	587905	0	1.27962e+06	2.22323e+06	1.46896e+06	2.22101e+06	1.39121e+06	1.109e+06	553853
Q921G6	Leucine-rich repeat and calponin homology domain-containing protein 4 OS=Mus musculus OX=10090 GN=Lrch4 PE=1 SV=1	regulation of biological process;response to stimulus	cytoplasm;membrane	protein binding	Lrch4			4.35527e+06	5.30032e+06	6.40138e+06	8.30006e+06	5.11136e+06	6.64604e+06	5.11276e+06	8.19033e+06	8.15423e+06	5.73107e+06
Q62422	Osteoclast-stimulating factor 1 OS=Mus musculus OX=10090 GN=Ostf1 PE=1 SV=2		cytoplasm;extracellular	protein binding	Ostf1			7.02205e+06	9.12556e+06	8.22185e+06	7.94961e+06	9566633	1.30744e+07	4.9539e+06	1.22945e+07	9.79187e+06	7.95466e+06
Q6ZWQ7	Signal peptidase complex subunit 3 OS=Mus musculus OX=10090 GN=Spcs3 PE=1 SV=1	metabolic process	endoplasmic reticulum;membrane	catalytic activity	Spcs3	Protein export		9.89562e+06	1.21977e+07	1.13617e+07	9.88009e+06	1.26238e+07	1.31732e+07	1.41499e+07	1.22649e+07	1.35484e+07	1.10768e+07
P84099	60S ribosomal protein L19 OS=Mus musculus OX=10090 GN=Rpl19 PE=1 SV=1	metabolic process	membrane;ribosome	RNA binding;structural molecule activity	Rpl19; Rpl19-ps11	Ribosome	Cytoplasmic Ribosomal Proteins; mRNA processing	893703	1.42955e+06	866105	1.55531e+06	938297	1.62373e+06	1.16976e+06	966453	1.53712e+06	1.21973e+06
Q07417	Short-chain specific acyl-CoA dehydrogenase, mitochondrial OS=Mus musculus OX=10090 GN=Acads PE=1 SV=2	cell organization and biogenesis;metabolic process	membrane;mitochondrion;nucleus;organelle lumen	catalytic activity;nucleotide binding	Acads	Fatty acid metabolism; Valine, leucine and isoleucine degradation; Metabolic pathways; Fatty acid degradation; Butanoate metabolism; Carbon metabolism	Fatty Acid Beta Oxidation; Mitochondrial LC-Fatty Acid Beta-Oxidation	0	3.00068e+06	1.65711e+06	2.13901e+06	2.58435e+06	1.88111e+06	1.76992e+06	2.23016e+06	2.75864e+06	2.11234e+06
P97386	DNA ligase 3 OS=Mus musculus OX=10090 GN=Lig3 PE=1 SV=2	cell division;cell organization and biogenesis;metabolic process;regulation of biological process;response to stimulus	chromosome;mitochondrion;nucleus	catalytic activity;DNA binding;metal ion binding;nucleotide binding;protein binding	Lig3			1.05454e+07	1.22183e+07	8.29408e+06	8.96415e+06	1.63206e+07	9.60025e+06	1.91146e+07	5.99965e+06	1.51083e+07	1.47389e+07
Q9JHJ3	Glycosylated lysosomal membrane protein OS=Mus musculus OX=10090 GN=Glmp PE=1 SV=1	regulation of biological process;response to stimulus	cytosol;membrane;nucleus;vacuole	DNA binding	0610031J06Rik; Glmp			8.80119e+06	1.0422e+07	1.15196e+07	8.36468e+06	1.58792e+07	1.08989e+07	1.00338e+07	1.48089e+07	1.38107e+07	1.34079e+07
Q91W86	Vacuolar protein sorting-associated protein 11 homolog OS=Mus musculus OX=10090 GN=Vps11 PE=1 SV=3	cell organization and biogenesis;metabolic process;regulation of biological process;transport	endosome;membrane;vacuole	metal ion binding;nucleotide binding;protein binding	Vps11			6.30138e+07	6.96268e+07	7.8078e+07	5.5986e+07	7.06293e+07	1.05555e+08	7.04787e+07	6.97221e+07	6.62847e+07	7.41791e+07
Q61216	Double-strand break repair protein MRE11 OS=Mus musculus OX=10090 GN=Mre11 PE=1 SV=1	cell organization and biogenesis;cell proliferation;metabolic process;regulation of biological process;response to stimulus	chromosome;cytoplasm;nucleus	catalytic activity;DNA binding;metal ion binding;protein binding	Mre11a	Non-homologous end-joining; Homologous recombination	Non-homologous end joining; Homologous recombination; miRNA regulation of DNA Damage Response	6.93433e+06	7.80833e+06	7.82762e+06	7.74524e+06	9.48881e+06	8.82167e+06	1.20049e+07	9.07171e+06	8.22054e+06	7.43457e+06
Q99L13	3-hydroxyisobutyrate dehydrogenase, mitochondrial OS=Mus musculus OX=10090 GN=Hibadh PE=1 SV=1	metabolic process;transport	mitochondrion	catalytic activity;nucleotide binding	Hibadh	Valine, leucine and isoleucine degradation; Metabolic pathways		8.4478e+06	7.55857e+06	7.50918e+06	8.02727e+06	5.33671e+06	7.35687e+06	9.76476e+06	7.40643e+06	8.39681e+06	9.27946e+06
Q61687	Transcriptional regulator ATRX OS=Mus musculus OX=10090 GN=Atrx PE=1 SV=3	cell organization and biogenesis;metabolic process;regulation of biological process;response to stimulus	chromosome;cytoplasm;nucleus	catalytic activity;DNA binding;metal ion binding;nucleotide binding;protein binding	Atrx		PluriNetWork	2.5932e+06	3.02964e+06	2.59451e+06	2.48215e+06	3.63963e+06	3.6644e+06	2.96919e+06	3.51656e+06	3.60484e+06	2.64563e+06
Q8BHF7	CDP-diacylglycerol--glycerol-3-phosphate 3-phosphatidyltransferase, mitochondrial OS=Mus musculus OX=10090 GN=Pgs1 PE=1 SV=1	metabolic process	endoplasmic reticulum;mitochondrion	catalytic activity;nucleotide binding	Pgs1	Metabolic pathways; Glycerophospholipid metabolism		1.00196e+07	5.56129e+06	6.81741e+06	4.80473e+06	1.11174e+07	1.04104e+07	9.96116e+06	7.58754e+06	7.04852e+06	8.79191e+06
O70325	Phospholipid hydroperoxide glutathione peroxidase OS=Mus musculus OX=10090 GN=Gpx4 PE=1 SV=4	cell organization and biogenesis;development;metabolic process;regulation of biological process;response to stimulus	cytoplasm;cytosol;membrane;mitochondrion;nucleus	antioxidant activity;catalytic activity;protein binding	Gpx4	Glutathione metabolism	Selenium metabolism/Selenoproteins; Metapathway biotransformation; Selenium Micronutrient Network; Folic Acid Network; Glutathione metabolism; One carbon metabolism and related pathways; Glutathione and one carbon metabolism	7.00484e+07	8.87175e+07	6.40821e+07	7.77916e+07	70254386	8.29319e+07	8.59053e+07	6.6127e+07	8.86158e+07	1.0032e+08
Q5SWD9	Pre-rRNA-processing protein TSR1 homolog OS=Mus musculus OX=10090 GN=Tsr1 PE=1 SV=1	cell organization and biogenesis;metabolic process	nucleus	catalytic activity;nucleotide binding;RNA binding	Tsr1			1.73948e+06	5.17378e+06	2.34466e+06	2.60519e+06	6.65144e+06	4.41355e+06	7.40857e+06	3.43173e+06	4.24012e+06	1.66082e+06
P49070	Calcium signal-modulating cyclophilin ligand OS=Mus musculus OX=10090 GN=Camlg PE=1 SV=2	metabolic process;regulation of biological process;response to stimulus	endoplasmic reticulum;membrane	protein binding	Caml			2.16146e+07	1.88076e+07	1.82368e+07	2.08691e+07	1.93221e+07	2.07655e+07	2.46821e+07	2.39904e+07	2.06329e+07	2.28618e+07
Q4LDD4	Arf-GAP with Rho-GAP domain, ANK repeat and PH domain-containing protein 1 OS=Mus musculus OX=10090 GN=Arap1 PE=1 SV=2	regulation of biological process;response to stimulus;transport	cytoplasm;cytosol;Golgi;membrane	DNA binding;enzyme regulator activity;metal ion binding;protein binding	Arap1	Endocytosis		2.88445e+07	2.90371e+07	3.08026e+07	1.4327e+07	3.53627e+07	2.76281e+07	3.41066e+07	3.02018e+07	2.69581e+07	3.919e+07
E9PYK3	Protein mono-ADP-ribosyltransferase PARP4 OS=Mus musculus OX=10090 GN=Parp4 PE=1 SV=1	cell death;cell organization and biogenesis;defense response;metabolic process;regulation of biological process;response to stimulus	cytoplasm;cytosol;membrane;nucleus	catalytic activity;protein binding	Parp4	Base excision repair; Apoptosis		8.51455e+07	9.79865e+07	1.01992e+08	9.60285e+07	1.0106e+08	1.09861e+08	1.08464e+08	1.19879e+08	105202499	1.07446e+08
Q9CVD2	Ataxin-3 OS=Mus musculus OX=10090 GN=Atxn3 PE=1 SV=2	cell organization and biogenesis;metabolic process;regulation of biological process;response to stimulus	cytoplasm;cytosol;membrane;nucleus;organelle lumen	catalytic activity;DNA binding;protein binding	Atxn3	Protein processing in endoplasmic reticulum		3.26883e+07	2.80991e+07	3.07494e+07	2.62883e+07	3.08551e+07	3.23556e+07	3.33187e+07	3.09831e+07	3.86002e+07	3.45168e+07
Q9QX47	Protein SON OS=Mus musculus OX=10090 GN=Son PE=1 SV=2	cell organization and biogenesis;metabolic process;regulation of biological process	nucleus	DNA binding;protein binding;RNA binding	Son		mRNA processing	1.93602e+06	406872	1.38529e+06	1.66638e+06	1.92137e+06	1.24811e+06	2.05266e+06	1.49584e+06	1.62281e+06	1.93335e+06
Q62203	Splicing factor 3A subunit 2 OS=Mus musculus OX=10090 GN=Sf3a2 PE=1 SV=2	cell organization and biogenesis;metabolic process	nucleus;spliceosomal complex	metal ion binding;protein binding;RNA binding	Sf3a2		mRNA processing	5.21527e+07	5.53405e+07	5.50039e+07	5.51326e+07	5.70439e+07	5.00533e+07	6.82809e+07	7.34465e+07	6.07838e+07	6.10359e+07
Q9CWR1	WD repeat-containing protein 73 OS=Mus musculus OX=10090 GN=Wdr73 PE=1 SV=1	cell organization and biogenesis;regulation of biological process	cytoplasm;cytoskeleton;cytosol	protein binding	Wdr73			7.72489e+06	9.60548e+06	8.55847e+06	9.90325e+06	1.0005e+07	1.06733e+07	1.12333e+07	1.1703e+07	10250235	8.41568e+06
P21855	B-cell differentiation antigen CD72 OS=Mus musculus OX=10090 GN=Cd72 PE=1 SV=2		membrane		Cd72	B cell receptor signaling pathway		1.49043e+06	1.33766e+06	1.14994e+06	1.1692e+06	1.52393e+06	1.31036e+06	1.58855e+06	1.4377e+06	1.8098e+06	1.46686e+06
Q791T5	Mitochondrial carrier homolog 1 OS=Mus musculus OX=10090 GN=Mtch1 PE=1 SV=1	cell death;metabolic process;regulation of biological process;transport	membrane;mitochondrion		Mtch1			8.79586e+07	7.95304e+07	8.59616e+07	5.16936e+07	94404729	9.26388e+07	9.71972e+07	9.11919e+07	8.27534e+07	9.21329e+07
Q9EST4	Proteasome assembly chaperone 2 OS=Mus musculus OX=10090 GN=Psmg2 PE=1 SV=1	cell organization and biogenesis;regulation of biological process	cytosol;nucleus;proteasome		Psmg2			9.07933e+06	7.77244e+06	1.43851e+07	8.46631e+06	15064255	1.64595e+07	1.33681e+07	1.35838e+07	1.02714e+07	8.81061e+06
Q9BDB7	Interferon-induced protein 44-like OS=Mus musculus OX=10090 GN=Ifi44l PE=2 SV=2	defense response;response to stimulus	cytoplasm		H28; Ifi44l			3.31823e+06	3.70457e+06	3.21267e+06	1.74589e+06	2.73202e+06	3.50888e+06	3.9904e+06	4.15665e+06	2.66819e+06	2.46134e+06
Q920A5	Retinoid-inducible serine carboxypeptidase OS=Mus musculus OX=10090 GN=Scpep1 PE=1 SV=2	metabolic process	cytosol;extracellular	catalytic activity	Scpep1			1.40689e+07	8.11361e+06	8.83014e+06	8.10948e+06	9.34567e+06	8.23189e+06	7.9366e+06	1.01037e+07	1.68489e+07	1.21614e+07
A2A6A1	G patch domain-containing protein 8 OS=Mus musculus OX=10090 GN=Gpatch8 PE=1 SV=1			metal ion binding;protein binding;RNA binding	Gpatch8			1.11226e+08	9.19423e+07	7.88462e+07	1.03125e+08	1.0029e+08	1.23975e+08	1.07722e+08	9.23709e+07	110733772	1.1871e+08
Q6PF93	Phosphatidylinositol 3-kinase catalytic subunit type 3 OS=Mus musculus OX=10090 GN=Pik3c3 PE=1 SV=1	cell communication;cell division;cell organization and biogenesis;metabolic process;regulation of biological process;response to stimulus;transport	cytosol;endosome;membrane;vacuole	catalytic activity;nucleotide binding;protein binding	Pik3c3	Metabolic pathways; Tuberculosis; Phagosome; Autophagy; Inositol phosphate metabolism; Phosphatidylinositol signaling system	Microglia Pathogen Phagocytosis Pathway; Regulation of Actin Cytoskeleton; Insulin Signaling	7.7495e+07	7.25636e+07	7.28294e+07	86367504	5.24182e+07	8.97682e+07	9.50751e+07	4.43446e+07	8.82875e+07	9.49081e+07
Q60953	Protein PML OS=Mus musculus OX=10090 GN=Pml PE=1 SV=3	cell death;cell differentiation;cell organization and biogenesis;cellular component movement;cellular homeostasis;defense response;metabolic process;regulation of biological process;response to stimulus;transport	cytoplasm;cytosol;endoplasmic reticulum;endosome;membrane;nucleus	DNA binding;metal ion binding;protein binding	Pml	Acute myeloid leukemia; Endocytosis; Herpes simplex infection; Ubiquitin mediated proteolysis; Transcriptional misregulation in cancer; Pathways in cancer; Influenza A	PluriNetWork; miRNA regulation of DNA Damage Response; TNF-alpha NF-kB Signaling Pathway	1.4948e+07	7.69568e+06	8.43274e+06	1.06357e+07	1.66215e+07	1.86491e+07	1.6603e+07	1.20115e+07	5.90385e+06	1.3304e+07
Q9ERV1	Probable E3 ubiquitin-protein ligase makorin-2 OS=Mus musculus OX=10090 GN=Mkrn2 PE=1 SV=2	metabolic process		catalytic activity;metal ion binding;protein binding;RNA binding	Mkrn2			1.23012e+08	9.18032e+07	9.01799e+07	7.3332e+07	9.92456e+07	9.81824e+07	1.17219e+08	1.08218e+08	9.56599e+07	1.24734e+08
Q9C6T7	Protein FATTY ACID EXPORT 5 OS=Arabidopsis thaliana OX=3702 GN=FAX5 PE=3 SV=1		membrane;mitochondrion		AT1G50740			1113583236	1133058689	1147166258	9.39806e+08	1223693042	1286844171	1352156259	1253731325	1198017130	1239019057
P53996	Cellular nucleic acid-binding protein OS=Mus musculus OX=10090 GN=Cnbp PE=1 SV=2	metabolic process;regulation of biological process	cytoplasm;cytosol;endoplasmic reticulum;nucleus	DNA binding;metal ion binding;RNA binding	Cnbp			1.11767e+06	818927	655856	1.11955e+06	1.26126e+06	1.02077e+06	1.20558e+06	943546	1.36765e+06	1.12461e+06
P84104	Serine/arginine-rich splicing factor 3 OS=Mus musculus OX=10090 GN=Srsf3 PE=1 SV=1	metabolic process;regulation of biological process;response to stimulus;transport	cytoplasm;nucleus	protein binding;RNA binding	Srsf3	Herpes simplex infection; Spliceosome	mRNA processing	652559	1.30107e+06	1.23897e+06	1.30526e+06	1918842	1.5419e+06	1.88344e+06	1.69999e+06	1.19398e+06	984820
Q9Z172	Small ubiquitin-related modifier 3 OS=Mus musculus OX=10090 GN=Sumo3 PE=1 SV=1	metabolic process;regulation of biological process	cytoplasm;nucleus	catalytic activity;protein binding	Sumo3	RNA transport	Exercise-induced Circadian Regulation; Exercise-induced Circadian Regulation	2.22316e+07	2.85129e+07	2.55443e+07	3.30671e+07	24232838	3.48446e+07	2.12867e+07	3.21515e+07	3.85552e+07	2.51802e+07
Q9JKX6	ADP-sugar pyrophosphatase OS=Mus musculus OX=10090 GN=Nudt5 PE=1 SV=1	cell organization and biogenesis;metabolic process	nucleus	catalytic activity;metal ion binding;protein binding;RNA binding	Nudt5	Purine metabolism	Purine metabolism	9.0502e+07	6.57709e+07	7.08879e+07	6.38211e+07	9.4431e+07	8.58189e+07	9.5265e+07	7.66791e+07	8.80414e+07	9.26645e+07
Q5SUQ9	CST complex subunit CTC1 OS=Mus musculus OX=10090 GN=Ctc1 PE=1 SV=2	cell organization and biogenesis;cell proliferation;metabolic process;regulation of biological process;response to stimulus	chromosome;nucleus	DNA binding;protein binding	Ctc1			4.52846e+06	5.04288e+06	0	7.84537e+06	5597501	5.60881e+06	4.16435e+06	4.15528e+06	6.76559e+06	5.48823e+06
Q8BJS4	SUN domain-containing protein 2 OS=Mus musculus OX=10090 GN=Sun2 PE=1 SV=3	cell organization and biogenesis;cellular component movement;regulation of biological process;transport	chromosome;endosome;membrane;nucleus	protein binding	Sun2			1.07775e+06	1.31168e+06	1.21185e+06	1.15826e+06	2.21573e+06	1.22254e+06	2.34068e+06	1.32548e+06	1.22213e+06	1.82369e+06
Q9D1J1	Adaptin ear-binding coat-associated protein 2 OS=Mus musculus OX=10090 GN=Necap2 PE=1 SV=1	transport	membrane		Necap2			2.72403e+08	2.32602e+08	2.9802e+08	2.65013e+08	2.74067e+08	2.91297e+08	2.92896e+08	3.31998e+08	3.00316e+08	3.0997e+08
Q9ESX5	H/ACA ribonucleoprotein complex subunit DKC1 OS=Mus musculus OX=10090 GN=Dkc1 PE=1 SV=4	cell organization and biogenesis;metabolic process;regulation of biological process	nucleus	catalytic activity;protein binding;RNA binding	Dkc1	Ribosome biogenesis in eukaryotes		431370	1.54385e+06	1.46626e+06	1.83101e+06	769557	1.78533e+06	410394	1.30392e+06	1.87058e+06	1.50089e+06
O55091	Protein IMPACT OS=Mus musculus OX=10090 GN=Impact PE=1 SV=2	cell communication;cell differentiation;cell growth;regulation of biological process;response to stimulus	cytoplasm	protein binding	Impact			8.4348e+07	98493799	1.05133e+08	8.84421e+07	1.10545e+08	109569462	1.14628e+08	105390005	1.05005e+08	1.19159e+08
Q9CX00	IST1 homolog OS=Mus musculus OX=10090 GN=Ist1 PE=1 SV=1	cell division;regulation of biological process;transport	chromosome;cytoplasm;cytoskeleton;cytosol;nucleus	protein binding	Ist1	Endocytosis		8.00289e+07	5.94138e+07	6.58834e+07	5.33352e+07	6.71404e+07	6.56053e+07	7.71827e+07	7.09879e+07	7.84511e+07	7.82581e+07
A2AH22	Activating molecule in BECN1-regulated autophagy protein 1 OS=Mus musculus OX=10090 GN=Ambra1 PE=1 SV=1	cell communication;cell differentiation;cell organization and biogenesis;development;metabolic process;regulation of biological process;response to stimulus	cytoplasm;cytosol;mitochondrion;vacuole	protein binding	Ambra1			4.80994e+06	5.69696e+06	6.22929e+06	4.12838e+06	5651034	6.5004e+06	6.95521e+06	4.72132e+06	5.75454e+06	6.21922e+06
Q8BXK9	Chloride intracellular channel protein 5 OS=Mus musculus OX=10090 GN=Clic5 PE=1 SV=1	cell organization and biogenesis;metabolic process;regulation of biological process;response to stimulus;transport	cytoplasm;cytoskeleton;Golgi;membrane;nucleus	catalytic activity;protein binding;transporter activity	Clic5			2.62329e+07	2.31191e+07	1.96921e+07	1.54348e+07	2.48135e+07	1.95014e+07	2.51428e+07	2.38766e+07	2.71944e+07	2.84853e+07
Q3TCH7	Cullin-4A OS=Mus musculus OX=10090 GN=Cul4a PE=1 SV=1	metabolic process;regulation of biological process;response to stimulus		catalytic activity;protein binding	Cul4a	Ubiquitin mediated proteolysis; Nucleotide excision repair		3.70054e+06	1.40004e+06	0	0	0	0	0	2.82751e+06	1.58138e+06	1.38652e+06
Q3U182	CREB-regulated transcription coactivator 2 OS=Mus musculus OX=10090 GN=Crtc2 PE=1 SV=2	cell organization and biogenesis;metabolic process;regulation of biological process;transport	cytoplasm;nucleus	protein binding	Crtc2	Insulin resistance; HTLV-I infection; PI3K-Akt signaling pathway; AMPK signaling pathway; Glucagon signaling pathway	Focal Adhesion-PI3K-Akt-mTOR-signaling pathway	1.09987e+08	1.22774e+08	1.07121e+08	7.79237e+07	1.36779e+08	1.36982e+08	1.22043e+08	1.28033e+08	1.29622e+08	1.13376e+08
Q8BG87	Methylcytosine dioxygenase TET3 OS=Mus musculus OX=10090 GN=Tet3 PE=1 SV=3	cell organization and biogenesis;development;metabolic process;regulation of biological process	cytoplasm;nucleus	catalytic activity;DNA binding;metal ion binding;protein binding	Tet3			5.57354e+08	4.78937e+08	4.93493e+08	5.57132e+08	5.58005e+08	5.44035e+08	6.1295e+08	615726290	6.09786e+08	622116819
Q9ZRZ8	DEAD-box ATP-dependent RNA helicase 28 OS=Arabidopsis thaliana OX=3702 GN=RH28 PE=2 SV=1	metabolic process	cytoplasm;nucleus	catalytic activity;nucleotide binding;RNA binding	AT4G16630			4.92521e+08	562791351	4.42036e+08	5.38651e+08	4.28332e+08	7.79863e+08	4.2108e+08	4.50228e+08	5.77789e+08	5.69684e+08
Q9D7S7	60S ribosomal protein L22-like 1 OS=Mus musculus OX=10090 GN=Rpl22l1 PE=1 SV=1	metabolic process	ribosome	RNA binding;structural molecule activity	Rpl22l1	Ribosome		1.24191e+07	1.0432e+07	8.28152e+06	1.40771e+07	1.43671e+07	8.66672e+06	1.45707e+07	13317691	1.52124e+07	1.58896e+07
Q80WE4	Kinesin-like protein KIF20B OS=Mus musculus OX=10090 GN=Kif20b PE=1 SV=3	cell division;cell organization and biogenesis;cellular component movement;metabolic process;regulation of biological process;transport	cytoplasm;cytoskeleton;cytosol;Golgi;nucleus	catalytic activity;motor activity;nucleotide binding;protein binding	Kif20b			2.66756e+07	2.33818e+07	1.42571e+07	8.55636e+06	1.92483e+07	2.32719e+07	1.8968e+07	2.21403e+07	2.29678e+07	1.72349e+07
P29391	Ferritin light chain 1 OS=Mus musculus OX=10090 GN=Ftl1 PE=1 SV=2	cellular homeostasis;transport	cytoplasm;extracellular;membrane;organelle lumen;vacuole	metal ion binding;protein binding	Ftl1			335146	276206	282274	328498	503643	371974	414666	402005	340862	428749
Q9WVE8	Protein kinase C and casein kinase substrate in neurons protein 2 OS=Mus musculus OX=10090 GN=Pacsin2 PE=1 SV=1	cell organization and biogenesis;metabolic process;regulation of biological process;response to stimulus;transport	cytoplasm;cytoskeleton;cytosol;endosome;membrane	catalytic activity;protein binding	Pacsin2			251939	312715	205161	237078	373529	224691	361303	236733	394998	347546
P35917	Vascular endothelial growth factor receptor 3 OS=Mus musculus OX=10090 GN=Flt4 PE=1 SV=1	metabolic process;regulation of biological process;response to stimulus	cytoplasm;membrane;nucleus	catalytic activity;nucleotide binding;protein binding;receptor activity;signal transducer activity	Flt4	Ras signaling pathway; Focal adhesion; Breast cancer; Rap1 signaling pathway; PI3K-Akt signaling pathway; Cytokine-cytokine receptor interaction	Focal Adhesion-PI3K-Akt-mTOR-signaling pathway	4.93545e+07	3.5585e+07	4.07439e+07	3.48613e+07	4.21987e+07	4.24507e+07	4.27755e+07	4.99457e+07	4.4778e+07	4.98947e+07
Q91Z53	Glyoxylate reductase/hydroxypyruvate reductase OS=Mus musculus OX=10090 GN=Grhpr PE=1 SV=1	cell organization and biogenesis;metabolic process	cytoplasm;cytosol	catalytic activity;nucleotide binding;protein binding	Grhpr	Pyruvate metabolism; Metabolic pathways; Glycine, serine and threonine metabolism; Glyoxylate and dicarboxylate metabolism		1.79777e+07	1.67607e+07	1.63043e+07	1.36264e+07	18315880	1.42299e+07	2.16937e+07	1.75293e+07	1.68352e+07	2.37789e+07
Q09XV5	Chromodomain-helicase-DNA-binding protein 8 OS=Mus musculus OX=10090 GN=Chd8 PE=1 SV=1	cell organization and biogenesis;metabolic process;regulation of biological process;response to stimulus	nucleus	catalytic activity;DNA binding;nucleotide binding;protein binding	Chd8	Wnt signaling pathway		1.71001e+07	1.53901e+07	1.13314e+07	1.58329e+07	17183945	1.69852e+07	1.54648e+07	17581941	1.65624e+07	2.04302e+07
O88895	Histone deacetylase 3 OS=Mus musculus OX=10090 GN=Hdac3 PE=1 SV=1	cell organization and biogenesis;metabolic process;regulation of biological process;response to stimulus	chromosome;cytoplasm;cytosol;Golgi;membrane;nucleus	catalytic activity;DNA binding;protein binding	Hdac3		Estrogen signaling	6.24458e+07	5.92749e+07	5.95832e+07	6.07848e+07	6.53191e+07	7.10554e+07	7.00923e+07	7.32465e+07	6.41217e+07	6.96403e+07
Q8BLN5	Lanosterol synthase OS=Mus musculus OX=10090 GN=Lss PE=1 SV=2	metabolic process;regulation of biological process	endoplasmic reticulum;membrane	catalytic activity	Lss	Steroid biosynthesis; Metabolic pathways	Cholesterol Biosynthesis	2.40378e+06	2.1111e+06	2.28387e+06	1.28248e+06	2.30921e+06	2.27993e+06	2.14866e+06	2.45592e+06	2.39719e+06	2.48597e+06
Q63943	Myocyte-specific enhancer factor 2D OS=Mus musculus OX=10090 GN=Mef2d PE=1 SV=2	cell death;cell differentiation;development;metabolic process;regulation of biological process	cytoplasm;nucleus	DNA binding;protein binding	Mef2d	cGMP-PKG signaling pathway	PluriNetWork; p38 MAPK Signaling Pathway; Adipogenesis genes	3.19097e+07	2.69011e+07	3.16516e+07	2.4261e+07	2.1457e+07	2.63923e+07	3.06168e+07	3.09001e+07	3.14687e+07	3.4847e+07
Q99LN9	Deoxyhypusine hydroxylase OS=Mus musculus OX=10090 GN=Dohh PE=1 SV=2	metabolic process		catalytic activity;metal ion binding	Dohh			3.85724e+06	3.91201e+06	2.76726e+06	4.04753e+06	3826622	3.76027e+06	4.5148e+06	3.78248e+06	4.74927e+06	4.03873e+06
P70122	Ribosome maturation protein SBDS OS=Mus musculus OX=10090 GN=Sbds PE=1 SV=4	cell organization and biogenesis;cell proliferation;cellular component movement;metabolic process;response to stimulus	cytoplasm;cytoskeleton;cytosol;nucleus	protein binding;RNA binding	Sbds	Ribosome biogenesis in eukaryotes		6.93509e+06	1.2736e+07	1.20191e+07	1.14175e+07	1.45525e+07	1.37008e+07	1.42542e+07	1.3567e+07	1.26147e+07	1.11265e+07
Q6PHN9	Ras-related protein Rab-35 OS=Mus musculus OX=10090 GN=Rab35 PE=1 SV=1	cell organization and biogenesis;regulation of biological process;response to stimulus;transport	endosome;membrane;mitochondrion	catalytic activity;nucleotide binding;protein binding	Rab35	Endocytosis		4.13444e+06	3.9756e+06	5.61342e+06	4.83376e+06	4.84e+06	5.70813e+06	4.88538e+06	6.36734e+06	5.79041e+06	3.72699e+06
Q8BFY6	Peflin OS=Mus musculus OX=10090 GN=Pef1 PE=1 SV=1	cell organization and biogenesis;metabolic process;regulation of biological process;response to stimulus;transport	cytoplasm;endoplasmic reticulum;membrane	catalytic activity;metal ion binding;protein binding;RNA binding	Pef1			2.01902e+08	1.37055e+08	1.78293e+08	1.15192e+08	1.91689e+08	1.81633e+08	2.06137e+08	1.77472e+08	1.87146e+08	1.80149e+08
Q8BR63	Protein FAM177A1 OS=Mus musculus OX=10090 GN=Fam177a1 PE=1 SV=1				1700047I17Rik2; Fam177a			3.41314e+07	2.90671e+07	3.19978e+07	2.88253e+07	3.29371e+07	3.4014e+07	4.15938e+07	3.61916e+07	3.32905e+07	3.25056e+07
Q9DBU0	Transmembrane 9 superfamily member 1 OS=Mus musculus OX=10090 GN=Tm9sf1 PE=2 SV=2	metabolic process	membrane;vacuole		Tm9sf1			2.15058e+07	2.38276e+07	2.41041e+07	1.8443e+07	3.24578e+07	2.95557e+07	3.23134e+07	2.63534e+07	2.39435e+07	2.39927e+07
Q8BXZ1	Protein disulfide-isomerase TMX3 OS=Mus musculus OX=10090 GN=Tmx3 PE=1 SV=2	cellular homeostasis;metabolic process;regulation of biological process;response to stimulus	cell surface;endoplasmic reticulum;membrane	catalytic activity	Tmx3			2.2744e+07	3.45493e+07	3.47708e+07	3.49655e+07	3.84107e+07	3.33301e+07	4.10368e+07	4.33474e+07	3.31791e+07	3.62902e+07
P09926	Surfeit locus protein 2 OS=Mus musculus OX=10090 GN=Surf2 PE=1 SV=1		membrane;nucleus		Surf2			4.17268e+07	5.22152e+07	4.66826e+07	4.77588e+07	4.58998e+07	6.04738e+07	5.4386e+07	4.63071e+07	4.45432e+07	5.93536e+07
Q9JHW2	Omega-amidase NIT2 OS=Mus musculus OX=10090 GN=Nit2 PE=1 SV=1	metabolic process	cytoplasm;cytosol;mitochondrion	catalytic activity	Nit2	Alanine, aspartate and glutamate metabolism		7.72874e+06	7.66819e+06	8.52185e+06	9.44675e+06	6.89095e+06	1.22514e+07	8.0412e+06	1.04273e+07	1.03442e+07	4.46771e+06
Q8CI32	BAG family molecular chaperone regulator 5 OS=Mus musculus OX=10090 GN=Bag5 PE=1 SV=1	cell death;cell organization and biogenesis;regulation of biological process	cytosol;membrane;mitochondrion;nucleus	protein binding	Bag5			4.55462e+07	5.66533e+07	5.35179e+07	3.54572e+07	55880703	5.00958e+07	6.33193e+07	7.07083e+07	5.26199e+07	4.253e+07
P60605	Ubiquitin-conjugating enzyme E2 G2 OS=Mus musculus OX=10090 GN=Ube2g2 PE=1 SV=1	metabolic process;response to stimulus	cytosol;endoplasmic reticulum	catalytic activity;nucleotide binding;protein binding	Ube2g2	Ubiquitin mediated proteolysis; Parkinson's disease; Protein processing in endoplasmic reticulum	Parkinsons Disease Pathway	2.43052e+08	2.96904e+08	2.05578e+08	2.41221e+08	2.60332e+08	2.93753e+08	2.66362e+08	2.42849e+08	2.95968e+08	3.10412e+08
Q91YS8	Calcium/calmodulin-dependent protein kinase type 1 OS=Mus musculus OX=10090 GN=Camk1 PE=1 SV=1	cell differentiation;development;metabolic process;regulation of biological process;response to stimulus;transport	cytoplasm;nucleus	catalytic activity;nucleotide binding;protein binding	Camk1	Oxytocin signaling pathway; Aldosterone synthesis and secretion	Calcium Regulation in the Cardiac Cell	2.91109e+06	1.67375e+06	1.76751e+06	1.92902e+06	3.25789e+06	2.0663e+06	3.57838e+06	2.16631e+06	3.05382e+06	2.17562e+06
P62843	40S ribosomal protein S15 OS=Mus musculus OX=10090 GN=Rps15 PE=1 SV=2	cell differentiation;cell organization and biogenesis;metabolic process;transport	membrane;ribosome	protein binding;RNA binding;structural molecule activity	Rps15	Ribosome	Cytoplasmic Ribosomal Proteins	2.87099e+07	2.91247e+07	2.66788e+07	1.28792e+07	2.98466e+07	2.7655e+07	2.77267e+07	3.05314e+07	2.24809e+07	3.5378e+07
P24860	G2/mitotic-specific cyclin-B1 OS=Mus musculus OX=10090 GN=Ccnb1 PE=1 SV=3	cell division;cell organization and biogenesis;metabolic process;regulation of biological process;response to stimulus	cytoplasm;cytoskeleton;cytosol;membrane;nucleus;organelle lumen	catalytic activity;enzyme regulator activity;protein binding	Ccnb1	FoxO signaling pathway; p53 signaling pathway; Progesterone-mediated oocyte maturation; Oocyte meiosis; Cell cycle	Hedgehog Signaling Pathway; miRNA regulation of DNA Damage Response	4.96655e+06	6.59101e+06	5.96336e+06	0	5.78005e+06	6.40993e+06	5.12636e+06	5.44556e+06	3.59577e+06	5.75032e+06
B9EKI3	TATA element modulatory factor OS=Mus musculus OX=10090 GN=Tmf1 PE=1 SV=2	cell differentiation;cell organization and biogenesis;cellular component movement;defense response;metabolic process;regulation of biological process;response to stimulus;transport	cytoplasm;endoplasmic reticulum;Golgi;membrane;nucleus	DNA binding;protein binding	Tmf1			1.05848e+08	1.07988e+08	1.25556e+08	8.89998e+07	1.40246e+08	1.14515e+08	1.35478e+08	1.47319e+08	1.27134e+08	1.17837e+08
Q80TN7	Neuron navigator 3 OS=Mus musculus OX=10090 GN=Nav3 PE=1 SV=2	regulation of biological process	membrane;nucleus	catalytic activity;nucleotide binding;protein binding;RNA binding	Nav3			8.84504e+07	5.89544e+07	8.28944e+07	8.23526e+07	98731427	1.15797e+08	101869961	1.07685e+08	7.05769e+07	6.8536e+07
Q3V1V3	ESF1 homolog OS=Mus musculus OX=10090 GN=Esf1 PE=1 SV=1	metabolic process;regulation of biological process	nucleus	RNA binding	Esf1			1.1637e+07	1.4011e+07	1.0249e+07	1.01661e+07	6.73842e+06	6.20817e+06	1.45945e+07	1.08467e+07	1.17172e+07	1.62471e+07
Q7TSH6	SR-related and CTD-associated factor 4 OS=Mus musculus OX=10090 GN=Scaf4 PE=1 SV=1	metabolic process		protein binding;RNA binding	Scaf4			3.69876e+07	3.20017e+07	2.71231e+07	2.97977e+07	3.48893e+07	3.20602e+07	3.57034e+07	3.50298e+07	3.43731e+07	4.43732e+07
Q6P549	Phosphatidylinositol 3,4,5-trisphosphate 5-phosphatase 2 OS=Mus musculus OX=10090 GN=Inppl1 PE=1 SV=1	cell organization and biogenesis;metabolic process;regulation of biological process;response to stimulus;transport	cytoplasm;cytoskeleton;cytosol;Golgi;membrane	catalytic activity;protein binding	Inppl1	Insulin signaling pathway; B cell receptor signaling pathway; Fc gamma R-mediated phagocytosis; Inositol phosphate metabolism; Phosphatidylinositol signaling system	IL-6 signaling Pathway; EGFR1 Signaling Pathway; Insulin Signaling	6.23863e+06	6.34987e+06	7.43752e+06	0	7948406	7.6262e+06	5.57857e+06	6.47166e+06	6.16945e+06	5.73416e+06
Q8CIE4	Protein mono-ADP-ribosyltransferase PARP10 OS=Mus musculus OX=10090 GN=Parp10 PE=2 SV=1	metabolic process;regulation of biological process	cytoplasm;cytosol;nucleus	catalytic activity;protein binding	Parp10			31189365	2.46805e+07	2.4429e+07	1.93167e+07	4.11734e+07	1.83136e+07	2.53285e+07	4.10213e+07	2.97973e+07	4.446e+07
Q9CQ33	Leucine-zipper-like transcriptional regulator 1 OS=Mus musculus OX=10090 GN=Lztr1 PE=1 SV=2	metabolic process	Golgi;nucleus	DNA binding;protein binding	Lztr1			3.42492e+08	3.02971e+08	2.90424e+08	2.93603e+08	3.60755e+08	3.58196e+08	3.47889e+08	3.69204e+08	3.3514e+08	3.84196e+08
O88907	E3 SUMO-protein ligase PIAS1 OS=Mus musculus OX=10090 GN=Pias1 PE=1 SV=2	cell differentiation;cell organization and biogenesis;metabolic process;regulation of biological process;response to stimulus	nucleus	catalytic activity;DNA binding;metal ion binding;protein binding	Pias1	Ubiquitin mediated proteolysis; Jak-STAT signaling pathway; Hepatitis C		2.25485e+07	2.05521e+07	1.75289e+07	2.35153e+07	2.30625e+07	1.93371e+07	2.50609e+07	2.32967e+07	2.55389e+07	2.77284e+07
A6H5Y3	Methionine synthase OS=Mus musculus OX=10090 GN=Mtr PE=1 SV=1	cell organization and biogenesis;metabolic process;response to stimulus	cytoplasm;cytosol	catalytic activity;metal ion binding	Mtr	Metabolic pathways; Biosynthesis of amino acids; Cysteine and methionine metabolism; Selenocompound metabolism; One carbon pool by folate	Selenium Micronutrient Network; Folic Acid Network; One carbon metabolism and related pathways; One Carbon Metabolism; Glutathione and one carbon metabolism	2.56432e+08	2.74751e+08	2.47026e+08	2.55549e+08	2.42006e+08	3.01243e+08	2.8294e+08	2.59176e+08	2.73813e+08	3.20781e+08
Q3UMR5	Calcium uniporter protein, mitochondrial OS=Mus musculus OX=10090 GN=Mcu PE=1 SV=2	cell organization and biogenesis;cellular homeostasis;regulation of biological process;response to stimulus;transport	membrane;mitochondrion	protein binding;transporter activity	Ccdc109a; Mcu	NOD-like receptor signaling pathway; Calcium signaling pathway		9.37128e+07	8.24201e+07	8.20288e+07	6.84962e+07	9.0875e+07	8.84927e+07	9.16825e+07	8.7218e+07	100467321	1.0274e+08
Q9D0Q7	39S ribosomal protein L45, mitochondrial OS=Mus musculus OX=10090 GN=Mrpl45 PE=1 SV=1		mitochondrion;ribosome	RNA binding	Mrpl45			2.24532e+07	1.79099e+07	1.23806e+07	1.3628e+07	1.89042e+07	2.15401e+07	1.50692e+07	1.45585e+07	2.10614e+07	2.3879e+07
P56380	Bis(5'-nucleosyl)-tetraphosphatase [asymmetrical] OS=Mus musculus OX=10090 GN=Nudt2 PE=1 SV=3	cell death	mitochondrion	catalytic activity;nucleotide binding	Nudt2	Purine metabolism; Pyrimidine metabolism	Purine metabolism	2.88133e+07	2.63426e+07	2.29931e+07	2.63427e+07	2.68287e+07	3.0458e+07	2.76122e+07	2.70723e+07	2.74111e+07	3.54167e+07
P70700	DNA-directed RNA polymerase I subunit RPA2 OS=Mus musculus OX=10090 GN=Polr1b PE=1 SV=2	cell organization and biogenesis;metabolic process;regulation of biological process	cytosol;nucleus	catalytic activity;DNA binding;metal ion binding;protein binding	Polr1b	RNA polymerase; Metabolic pathways; Purine metabolism; Pyrimidine metabolism	Purine metabolism; TNF-alpha NF-kB Signaling Pathway; Eukaryotic Transcription Initiation	3.43387e+07	3.5574e+07	3.77723e+07	3.39628e+07	4.1463e+07	4.04183e+07	4.10431e+07	4.33031e+07	4.10589e+07	4.04974e+07
Q3V300	Kinesin-like protein KIF22 OS=Mus musculus OX=10090 GN=Kif22 PE=2 SV=2	cell organization and biogenesis;cellular component movement;metabolic process;response to stimulus	chromosome;cytoplasm;cytoskeleton;cytosol;nucleus	catalytic activity;DNA binding;motor activity;nucleotide binding;protein binding	Kif22			1.24916e+08	1.48746e+08	1.28706e+08	1.19497e+08	1.59961e+08	1.52616e+08	1.6632e+08	1.43445e+08	1.52594e+08	1.53064e+08
Q9CZT6	Protein CMSS1 OS=Mus musculus OX=10090 GN=Cmss1 PE=2 SV=1		nucleus	nucleotide binding;RNA binding	Cmss1			2.82134e+07	2.49141e+07	2.50568e+07	1.45606e+07	1.22406e+07	1.44231e+07	2.39882e+07	2.27045e+07	3.23111e+07	2.47874e+07
Q8CGZ0	Calcium homeostasis endoplasmic reticulum protein OS=Mus musculus OX=10090 GN=Cherp PE=1 SV=1	cellular homeostasis;metabolic process;regulation of biological process;transport	cytoplasm;endoplasmic reticulum;membrane	protein binding;RNA binding	Cherp	Spliceosome		4.33794e+06	4.90811e+06	4.42422e+06	6.4533e+06	5.53574e+06	3.96777e+06	5.85252e+06	7.05595e+06	5.76351e+06	6.2509e+06
Q9CQE0	E3 ubiquitin-protein ligase RNF138 OS=Mus musculus OX=10090 GN=Rnf138 PE=2 SV=1	metabolic process;regulation of biological process;response to stimulus	chromosome;nucleus	catalytic activity;DNA binding;metal ion binding;protein binding	Rnf138			4.13725e+08	4.34257e+08	4.04447e+08	4.02816e+08	5.02037e+08	5.302e+08	4.49571e+08	4.81302e+08	4.66302e+08	5.00636e+08
P52825	Carnitine O-palmitoyltransferase 2, mitochondrial OS=Mus musculus OX=10090 GN=Cpt2 PE=1 SV=2	metabolic process;transport	membrane;mitochondrion	catalytic activity	Cpt2	PPAR signaling pathway; Fatty acid metabolism; Fatty acid degradation	Fatty Acid Beta Oxidation; PPAR signaling pathway; Mitochondrial LC-Fatty Acid Beta-Oxidation	6.36342e+06	5.03378e+06	5.44958e+06	6.19285e+06	2.38614e+06	1.27949e+06	6.02674e+06	5.01205e+06	1.17166e+07	4.58096e+06
Q8R0F5	RNA-binding motif protein, X-linked 2 OS=Mus musculus OX=10090 GN=Rbmx2 PE=1 SV=1	metabolic process;transport	spliceosomal complex	catalytic activity;RNA binding	Rbmx2		mRNA processing	2.76509e+07	2.22277e+07	2.23129e+07	2.63897e+07	34360848	2.36895e+07	3.10029e+07	3.06578e+07	3.73491e+07	2.6899e+07
P03958	Adenosine deaminase OS=Mus musculus OX=10090 GN=Ada PE=1 SV=3	cell differentiation;metabolic process;regulation of biological process;response to stimulus;transport	cell surface;cytoplasm;cytosol;membrane;organelle lumen;vacuole	catalytic activity;metal ion binding	Ada	Primary immunodeficiency; Metabolic pathways; Purine metabolism	Purine metabolism	1.80156e+07	2.01592e+07	1.97614e+07	1.55174e+07	2.117e+07	2.34895e+07	2.16544e+07	1.8503e+07	1.93194e+07	2.34951e+07
Q9CQ48	NudC domain-containing protein 2 OS=Mus musculus OX=10090 GN=Nudcd2 PE=1 SV=1	metabolic process	chromosome;cytoplasm;cytoskeleton;cytosol	protein binding	Nudcd2			4.61449e+06	1.09708e+07	1.10816e+07	8.89325e+06	1.27619e+07	9.37839e+06	1.35393e+07	1.35038e+07	7.466e+06	10461867
Q9DCE5	p21-activated protein kinase-interacting protein 1 OS=Mus musculus OX=10090 GN=Pak1ip1 PE=1 SV=2	cell proliferation;regulation of biological process	nucleus	protein binding	Pak1ip1			2.60964e+06	5.65169e+06	2.8676e+06	8.47566e+06	3.813e+06	6.1902e+06	0	8.53268e+06	7.63248e+06	3.9712e+06
Q9DCS9	NADH dehydrogenase [ubiquinone] 1 beta subcomplex subunit 10 OS=Mus musculus OX=10090 GN=Ndufb10 PE=1 SV=3	cell organization and biogenesis;metabolic process;transport	membrane;mitochondrion		Ndufb10	Metabolic pathways; Huntington's disease; Non-alcoholic fatty liver disease (NAFLD); Oxidative phosphorylation; Parkinson's disease; Alzheimer's disease	Oxidative phosphorylation; Electron Transport Chain	6.02622e+06	7.34062e+06	6.50696e+06	5.60882e+06	5.70828e+06	7.24193e+06	8.00139e+06	7.6524e+06	5.62331e+06	6.52404e+06
Q9R0G7	Zinc finger E-box-binding homeobox 2 OS=Mus musculus OX=10090 GN=Zeb2 PE=1 SV=2	cell growth;cell organization and biogenesis;cell proliferation;cellular component movement;metabolic process;regulation of biological process	cytosol;nucleus	DNA binding;metal ion binding;protein binding	Zeb2	MicroRNAs in cancer	TGF Beta Signaling Pathway	5.58507e+07	3.733e+07	4.96852e+07	3.05652e+07	6.12965e+07	4.85235e+07	5.99553e+07	5.75945e+07	3.96576e+07	5.79594e+07
Q9Z2A0	3-phosphoinositide-dependent protein kinase 1 OS=Mus musculus OX=10090 GN=Pdpk1 PE=1 SV=2	cell organization and biogenesis;cellular component movement;metabolic process;regulation of biological process;response to stimulus	cytoplasm;cytosol;membrane;nucleus	catalytic activity;enzyme regulator activity;nucleotide binding;protein binding	Pdpk1	FoxO signaling pathway; PPAR signaling pathway; mTOR signaling pathway; Platinum drug resistance; T cell receptor signaling pathway; Focal adhesion; Insulin signaling pathway; Endometrial cancer; Toxoplasmosis; Insulin resistance; Non-small cell lung cancer; Sphingolipid signaling pathway; Proteoglycans in cancer; Thyroid hormone signaling pathway; Neurotrophin signaling pathway; Hepatitis C; PI3…	MicroRNAs in Cardiomyocyte Hypertrophy; PPAR signaling pathway; Focal Adhesion-PI3K-Akt-mTOR-signaling pathway; Leptin Insulin Overlap; Integrin-mediated Cell Adhesion; Insulin Signaling; Focal Adhesion	3.47613e+07	1.48033e+07	2.74392e+07	1.83979e+07	3.29161e+07	3.12713e+07	3.34151e+07	2.74951e+07	2.44104e+07	2.75265e+07
Q9Z2G6	Protein sel-1 homolog 1 OS=Mus musculus OX=10090 GN=Sel1l PE=1 SV=2	metabolic process;regulation of biological process;response to stimulus;transport	endoplasmic reticulum;membrane	protein binding	Sel1l	Protein processing in endoplasmic reticulum		7.85362e+06	5.13757e+06	4.63161e+06	6.88615e+06	7.24907e+06	7.21348e+06	7.91939e+06	5.69271e+06	6.55462e+06	8.28386e+06
Q78WZ7	DNA-directed RNA polymerase I subunit RPA43 OS=Mus musculus OX=10090 GN=Twistnb PE=1 SV=1	metabolic process	nucleus	catalytic activity	Twistnb	RNA polymerase; Metabolic pathways; Purine metabolism; Pyrimidine metabolism		4.64578e+07	4.22127e+07	3.7112e+07	3.58746e+07	5.56163e+07	5.34545e+07	51355256	5.09612e+07	4.87828e+07	3.94246e+07
Q9CZ04	COP9 signalosome complex subunit 7a OS=Mus musculus OX=10090 GN=Cops7a PE=1 SV=2	metabolic process	cytoplasm;cytosol;nucleus	protein binding	Cops7a			5.66276e+06	6.43787e+06	4.47868e+06	7.15258e+06	5.91051e+06	7.89823e+06	5.15715e+06	8.7043e+06	9.45085e+06	2.07376e+06
Q9D0D5	General transcription factor IIE subunit 1 OS=Mus musculus OX=10090 GN=Gtf2e1 PE=1 SV=1	metabolic process;regulation of biological process	cytosol;nucleus	DNA binding;metal ion binding	Gtf2e1	Basal transcription factors; Epstein-Barr virus infection; Viral carcinogenesis	Estrogen signaling; Eukaryotic Transcription Initiation	7.29048e+07	8.44653e+07	6.58024e+07	8.37629e+07	6.10773e+07	9.63923e+07	7.65318e+07	6.74846e+07	7.75731e+07	9.43956e+07
Q9QYB5	Gamma-adducin OS=Mus musculus OX=10090 GN=Add3 PE=1 SV=2	response to stimulus	chromosome;cytoplasm;cytoskeleton;membrane	protein binding;structural molecule activity	Add3			6.16595e+07	6.26723e+07	6.06957e+07	5.52284e+07	6.18542e+07	5.93911e+07	6.44781e+07	7.25698e+07	7.23785e+07	6.95789e+07
Q8C1Y8	Vacuolar fusion protein CCZ1 homolog OS=Mus musculus OX=10090 GN=Ccz1 PE=1 SV=1	transport	cytosol;membrane;vacuole		Ccz1			5.49912e+07	5.57312e+07	6.5979e+07	5.73193e+07	6.04725e+07	7.23377e+07	6.56675e+07	7.52121e+07	6.51643e+07	5.14553e+07
Q60855	Receptor-interacting serine/threonine-protein kinase 1 OS=Mus musculus OX=10090 GN=Ripk1 PE=1 SV=1	cell death;cell organization and biogenesis;metabolic process;regulation of biological process;response to stimulus	cytoplasm;cytosol;membrane;mitochondrion	catalytic activity;nucleotide binding;protein binding;signal transducer activity	Ripk1	TNF signaling pathway; NOD-like receptor signaling pathway; Epstein-Barr virus infection; RIG-I-like receptor signaling pathway; Toll-like receptor signaling pathway; Hepatitis C; Cytosolic DNA-sensing pathway; NF-kappa B signaling pathway; Apoptosis	Apoptosis; Apoptosis Modulation by HSP70; TNF-alpha NF-kB Signaling Pathway; p38 MAPK Signaling Pathway; EGFR1 Signaling Pathway	3.60017e+07	3.75377e+07	3.83465e+07	3.31904e+07	4.26002e+07	4.69668e+07	4.46143e+07	4.43585e+07	3.55299e+07	3.87221e+07
Q91ZE0	Trimethyllysine dioxygenase, mitochondrial OS=Mus musculus OX=10090 GN=Tmlhe PE=1 SV=2	metabolic process;regulation of biological process	mitochondrion;organelle lumen	catalytic activity;metal ion binding	Tmlhe	Lysine degradation		1.0399e+08	8.71516e+07	9.78188e+07	1.06807e+08	1.26031e+08	102769816	1.26203e+08	1.11736e+08	1.10078e+08	1.33588e+08
Q6PG16	Holliday junction recognition protein OS=Mus musculus OX=10090 GN=Hjurp PE=1 SV=1	cell organization and biogenesis;regulation of biological process	chromosome;cytosol;mitochondrion;nucleus	DNA binding;protein binding	Hjurp; A730008H23Rik			2.27602e+07	2.089e+07	2.28479e+07	1.54225e+07	24035260	2.31532e+07	2.33569e+07	2.46754e+07	2.38233e+07	2.36384e+07
Q9DCX2	ATP synthase subunit d, mitochondrial OS=Mus musculus OX=10090 GN=Atp5pd PE=1 SV=3	metabolic process;transport	cytosol;membrane;mitochondrion	catalytic activity;transporter activity	Atp5h	Metabolic pathways; Huntington's disease; Oxidative phosphorylation; Parkinson's disease; Alzheimer's disease	Oxidative phosphorylation; Electron Transport Chain	4.0798e+06	4.42809e+06	3.72078e+06	3.47206e+06	3.76165e+06	4.28942e+06	4.17613e+06	4.07089e+06	3.78162e+06	5.46575e+06
P30285	Cyclin-dependent kinase 4 OS=Mus musculus OX=10090 GN=Cdk4 PE=1 SV=1	cell division;cell organization and biogenesis;metabolic process;regulation of biological process;response to stimulus	chromosome;cytoplasm;cytosol;membrane;nucleus	catalytic activity;nucleotide binding;protein binding	Cdk4	AGE-RAGE signaling pathway in diabetic complications; T cell receptor signaling pathway; p53 signaling pathway; Breast cancer; Melanoma; Small cell lung cancer; Hepatitis B; HTLV-I infection; Non-small cell lung cancer; Cell cycle; Pathways in cancer; Pancreatic cancer; PI3K-Akt signaling pathway; Tight junction; Glioma; Viral carcinogenesis; Chronic myeloid leukemia; Measles; Endocrine resistanc…	miRNA regulation of DNA Damage Response; Spinal Cord Injury; Ovarian Infertility Genes; IL-7 Signaling Pathway; G1 to S cell cycle control	0	1.07151e+06	749450	0	657993	0	695560	839615	620339	618817
Q8BMJ3	Eukaryotic translation initiation factor 1A, X-chromosomal OS=Mus musculus OX=10090 GN=Eif1ax PE=2 SV=3	metabolic process		RNA binding	Eif1ax	RNA transport		8.77526e+06	1.52194e+07	1.27959e+07	1.22877e+07	1.25728e+07	1.25936e+07	1.58858e+07	1.18188e+07	1.54156e+07	1.3274e+07
P40201	Chromodomain-helicase-DNA-binding protein 1 OS=Mus musculus OX=10090 GN=Chd1 PE=1 SV=3	cell organization and biogenesis;metabolic process;regulation of biological process	cytoplasm;nucleus	catalytic activity;DNA binding;nucleotide binding;protein binding	Chd1			1.20985e+08	1.05258e+08	1.22685e+08	8.6742e+07	1.28136e+08	1.25674e+08	1.32098e+08	1.37803e+08	1.14619e+08	1.20685e+08
Q9D1R9	60S ribosomal protein L34 OS=Mus musculus OX=10090 GN=Rpl34 PE=1 SV=2	metabolic process	mitochondrion;ribosome	protein binding;RNA binding;structural molecule activity	Rpl34-ps1; Rpl34; Gm4705	Ribosome	Cytoplasmic Ribosomal Proteins	2.95115e+07	2.97423e+07	3.41886e+07	2.65134e+07	3.58562e+07	3.31988e+07	3.63241e+07	3.69348e+07	3.25129e+07	3.53246e+07
Q60675	Laminin subunit alpha-2 OS=Mus musculus OX=10090 GN=Lama2 PE=1 SV=2	cell differentiation;cell organization and biogenesis;cellular component movement;metabolic process;regulation of biological process;response to stimulus;transport	cytoplasm;cytoskeleton;extracellular;Golgi;membrane	catalytic activity;motor activity;protein binding;structural molecule activity;transporter activity	Lama2	Hypertrophic cardiomyopathy (HCM); Arrhythmogenic right ventricular cardiomyopathy (ARVC); Focal adhesion; Toxoplasmosis; Small cell lung cancer; Dilated cardiomyopathy; Pathways in cancer; Viral myocarditis; ECM-receptor interaction; PI3K-Akt signaling pathway; Amoebiasis	Focal Adhesion-PI3K-Akt-mTOR-signaling pathway; Alpha6-Beta4 Integrin Signaling Pathway; Focal Adhesion	4.32502e+08	3.96596e+08	4.11286e+08	3.39916e+08	5.30106e+08	4.78338e+08	4.95161e+08	4.46593e+08	4.03811e+08	5.36355e+08
Q9ESC8	AF4/FMR2 family member 4 OS=Mus musculus OX=10090 GN=Aff4 PE=1 SV=1	metabolic process;regulation of biological process	nucleus	protein binding	Aff4			2.13262e+08	1.75589e+08	2.14964e+08	1.56041e+08	2.46617e+08	2.23615e+08	2.40021e+08	2.33309e+08	2.12101e+08	2.16096e+08
Q8VDQ9	Protein KRI1 homolog OS=Mus musculus OX=10090 GN=Kri1 PE=1 SV=3	metabolic process		RNA binding	Kri1			2.47009e+06	3.83467e+06	3.5474e+06	2.81246e+06	3.75031e+06	3.16074e+06	3.55206e+06	3.90567e+06	3.6166e+06	4.11044e+06
Q9D4H4	Angiomotin-like protein 1 OS=Mus musculus OX=10090 GN=Amotl1 PE=1 SV=2	regulation of biological process;response to stimulus	membrane	protein binding	Amotl1	Tight junction		9.81488e+07	1.08381e+08	1.15508e+08	8.01966e+07	1.35855e+08	1.18395e+08	1.18422e+08	1.5088e+08	1.07901e+08	1.05709e+08
Q922H1	Protein arginine N-methyltransferase 3 OS=Mus musculus OX=10090 GN=Prmt3 PE=1 SV=2	cell organization and biogenesis;metabolic process;regulation of biological process	cytoplasm;cytosol;ribosome	catalytic activity;metal ion binding;protein binding	Prmt3			1.07243e+07	1.15989e+07	1.13917e+07	1.1118e+07	1.58908e+07	1.42262e+07	1.26113e+07	1.57394e+07	1.07987e+07	1.44619e+07
Q8JZN5	Acyl-CoA dehydrogenase family member 9, mitochondrial OS=Mus musculus OX=10090 GN=Acad9 PE=1 SV=2	cell organization and biogenesis;metabolic process	membrane;mitochondrion;nucleus	catalytic activity;nucleotide binding	Acad9			273992	325984	306030	365716	342914	224281	410714	324872	474011	369875
O88554	Poly [ADP-ribose] polymerase 2 OS=Mus musculus OX=10090 GN=Parp2 PE=1 SV=3	metabolic process;regulation of biological process;response to stimulus	cytoplasm;nucleus	catalytic activity;DNA binding;protein binding	Parp2	Base excision repair; Apoptosis		1.43687e+07	1.03102e+07	1.24956e+07	9.81974e+06	1.32118e+07	1.47386e+07	1.05652e+07	1.39491e+07	1.13413e+07	1.66154e+07
Q9D1R2	Protein KTI12 homolog OS=Mus musculus OX=10090 GN=Kti12 PE=1 SV=1			nucleotide binding	Kti12			1.61541e+08	1.74381e+08	1.68244e+08	1.48058e+08	170770945	1.8512e+08	182686938	1.83018e+08	1.8225e+08	1.85124e+08
Q9EP71	Ankycorbin OS=Mus musculus OX=10090 GN=Rai14 PE=1 SV=1	cell differentiation;cell organization and biogenesis;transport	cytoplasm;cytoskeleton;cytosol;membrane;mitochondrion;nucleus	catalytic activity;motor activity;protein binding	Rai14			1.47165e+08	1.49038e+08	1.35816e+08	9.28265e+07	1.3067e+08	1.46069e+08	1.46918e+08	1.37909e+08	1.42222e+08	1.58155e+08
Q8BYA0	Tubulin-specific chaperone D OS=Mus musculus OX=10090 GN=Tbcd PE=1 SV=1	cell organization and biogenesis;metabolic process;regulation of biological process	cytoplasm;cytoskeleton;membrane	enzyme regulator activity;protein binding	Tbcd			2.05328e+06	1.57871e+06	1.82582e+06	1.57959e+06	2066611	2.2962e+06	1.64202e+06	1.67666e+06	1.84335e+06	2.69713e+06
Q9CQG2	RNA N6-adenosine-methyltransferase METTL16 OS=Mus musculus OX=10090 GN=Mettl16 PE=1 SV=1	metabolic process;regulation of biological process	nucleus	catalytic activity;RNA binding	Mettl16			5.16761e+06	1.14567e+07	1.66991e+07	1.27654e+07	13123548	1.5207e+07	1.31709e+07	1.92466e+07	1.29514e+07	5.46914e+06
Q9CQ65	S-methyl-5'-thioadenosine phosphorylase OS=Mus musculus OX=10090 GN=Mtap PE=1 SV=1	metabolic process;response to stimulus	cytoplasm;cytosol;nucleus	catalytic activity	Mtap	Metabolic pathways; Cysteine and methionine metabolism		1.44718e+06	1.5151e+06	812006	1.64517e+06	2.08734e+06	1.52132e+06	2.01733e+06	1.41738e+06	1.65202e+06	1.76299e+06
Q9D1J3	SAP domain-containing ribonucleoprotein OS=Mus musculus OX=10090 GN=Sarnp PE=1 SV=3	metabolic process;regulation of biological process;transport	nucleus	DNA binding;protein binding;RNA binding	Sarnp; Gm6563			122313503	1.32564e+08	1.5048e+08	1.21326e+08	1.65838e+08	1.60156e+08	1.56778e+08	1.57009e+08	1.3995e+08	1.58069e+08
O88842	FYVE, RhoGEF and PH domain-containing protein 3 OS=Mus musculus OX=10090 GN=Fgd3 PE=1 SV=1	cell organization and biogenesis;regulation of biological process	cytoplasm;cytoskeleton	metal ion binding	Fgd3			656921	735892	674342	640413	941905	527280	1.0604e+06	769679	826003	884401
Q7TMR0	Lysosomal Pro-X carboxypeptidase OS=Mus musculus OX=10090 GN=Prcp PE=1 SV=2	defense response;metabolic process;regulation of biological process;response to stimulus	vacuole	catalytic activity	Prcp	Protein digestion and absorption; Renin-angiotensin system		9.72079e+07	1.23436e+08	8.33984e+07	1.36678e+08	7.87502e+07	1.1323e+08	1.07779e+08	9.21152e+07	1.40645e+08	1.25168e+08
Q9JJK2	LanC-like protein 2 OS=Mus musculus OX=10090 GN=Lancl2 PE=1 SV=1	regulation of biological process;response to stimulus	cytoplasm;cytoskeleton;cytosol;membrane;nucleus		Lancl2			3.54431e+06	1.42096e+06	3.09453e+06	3.66063e+06	3.05822e+06	3.49316e+06	2.5263e+06	3.8247e+06	2.95869e+06	3.66638e+06
Q69ZK0	Phosphatidylinositol 3,4,5-trisphosphate-dependent Rac exchanger 1 protein OS=Mus musculus OX=10090 GN=Prex1 PE=1 SV=2	cell differentiation;cell organization and biogenesis;cellular component movement;metabolic process;regulation of biological process;response to stimulus	cytoplasm;cytosol;membrane	protein binding	Prex1	Chemokine signaling pathway	Chemokine signaling pathway	5.8265e+06	4.52276e+06	4.61129e+06	2.32204e+06	5.50933e+06	4.55287e+06	4.38686e+06	6.0715e+06	6.01806e+06	4.36603e+06
P12265	Beta-glucuronidase OS=Mus musculus OX=10090 GN=Gusb PE=1 SV=2	metabolic process	endoplasmic reticulum;membrane;vacuole	catalytic activity;protein binding	Gusb	Metabolic pathways; Lysosome; Drug metabolism - other enzymes; Glycosaminoglycan degradation; Porphyrin and chlorophyll metabolism; Pentose and glucuronate interconversions		1.36391e+08	1.24559e+08	136399992	1.53863e+08	1.32474e+08	1.39113e+08	1.49789e+08	1.67915e+08	159921507	1.44996e+08
Q9ESP1	Stromal cell-derived factor 2-like protein 1 OS=Mus musculus OX=10090 GN=Sdf2l1 PE=1 SV=2	metabolic process;regulation of biological process;response to stimulus	endoplasmic reticulum;membrane;organelle lumen	catalytic activity;protein binding	Sdf2l1			9.41724e+07	6.97091e+07	7.07168e+07	5.58017e+07	9.5771e+07	8.07757e+07	9.20757e+07	8.62052e+07	6.88876e+07	1.02219e+08
O09000	Nuclear receptor coactivator 3 OS=Mus musculus OX=10090 GN=Ncoa3 PE=1 SV=2	cell organization and biogenesis;metabolic process;regulation of biological process;response to stimulus	cytoplasm;cytosol;Golgi;nucleus	catalytic activity;DNA binding;protein binding	Ncoa3			6.67845e+06	3.13872e+06	1.71191e+07	6.99767e+06	1.18413e+06	1.04446e+07	3.17281e+06	6.75483e+06	1.23737e+07	6.3721e+06
P63085	Mitogen-activated protein kinase 1 OS=Mus musculus OX=10090 GN=Mapk1 PE=1 SV=3	cell communication;cell death;cell differentiation;cell proliferation;cellular homeostasis;metabolic process;regulation of biological process;response to stimulus;transport	cytoplasm;cytoskeleton;cytosol;endosome;Golgi;membrane;mitochondrion;nucleus	catalytic activity;nucleotide binding;protein binding;signal transducer activity	Mapk1	Oxytocin signaling pathway; ErbB signaling pathway; FoxO signaling pathway; Acute myeloid leukemia; AGE-RAGE signaling pathway in diabetic complications; mTOR signaling pathway; Cholinergic synapse; Platinum drug resistance; Chagas disease (American trypanosomiasis); T cell receptor signaling pathway; Phospholipase D signaling pathway; Retrograde endocannabinoid signaling; Regulation of actin cyt…	IL-9 Signaling Pathway; EBV LMP1 signaling; Estrogen signaling; Hypothetical Network for Drug Addiction; EPO Receptor Signaling; ErbB signaling pathway; IL-5 Signaling Pathway; MicroRNAs in Cardiomyocyte Hypertrophy; PluriNetWork; Signaling of Hepatocyte Growth Factor Receptor; Heart Development; Alzheimers Disease; Chemokine signaling pathway; Spinal Cord Injury; MAPK Cascade; Delta-Notch Signal…	824690	742011	622862	565050	1.00092e+06	493344	1.08322e+06	828038	769785	1.00818e+06
Q80Y14	Glutaredoxin-related protein 5, mitochondrial OS=Mus musculus OX=10090 GN=Glrx5 PE=1 SV=2	cellular homeostasis;metabolic process;regulation of biological process	mitochondrion;nucleus;organelle lumen	catalytic activity;metal ion binding	Glrx5			5.06166e+07	4.9709e+07	5.90821e+07	44508045	6.43045e+07	4.97748e+07	7.3422e+07	6.0645e+07	5.79057e+07	5.6896e+07
Q8R0F3	Formylglycine-generating enzyme OS=Mus musculus OX=10090 GN=Sumf1 PE=1 SV=2	metabolic process	endoplasmic reticulum;organelle lumen	catalytic activity;metal ion binding;protein binding	Sumf1	Lysosome		9.04896e+06	1.13789e+07	1.09708e+07	9.98344e+06	8.53217e+06	1.0737e+07	1.17755e+07	1.21801e+07	1.20395e+07	8.83896e+06
Q3UM45	Protein phosphatase 1 regulatory subunit 7 OS=Mus musculus OX=10090 GN=Ppp1r7 PE=1 SV=2	regulation of biological process	chromosome;nucleus	protein binding	Ppp1r7			3.51466e+06	3.80966e+06	561909	5.79852e+06	2.55838e+06	3.57685e+06	2.47963e+06	4.72367e+06	5.03757e+06	2.26378e+06
Q3UKJ7	WD40 repeat-containing protein SMU1 OS=Mus musculus OX=10090 GN=Smu1 PE=2 SV=2	metabolic process;regulation of biological process	cytoplasm;nucleus;spliceosomal complex	protein binding	Smu1			0	907420	1.47497e+06	1.60792e+06	1.68692e+06	1.69461e+06	2.58419e+06	2.04064e+06	0	0
Q9FGS4	Quinolinate synthase, chloroplastic OS=Arabidopsis thaliana OX=3702 GN=QS PE=1 SV=1	cell organization and biogenesis;metabolic process;regulation of biological process		catalytic activity;enzyme regulator activity;metal ion binding;protein binding	QS	Metabolic pathways; Nicotinate and nicotinamide metabolism		7.09463e+08	8.3309e+08	6.38717e+08	6.89951e+08	657145189	8.82151e+08	7.15946e+08	6.73973e+08	8.20889e+08	8.33554e+08
Q9Z0W3	Nuclear pore complex protein Nup160 OS=Mus musculus OX=10090 GN=Nup160 PE=1 SV=2	transport	chromosome;nucleus	protein binding;transporter activity	Nup160	RNA transport		2.17651e+06	2.31278e+06	3.19285e+06	1.92069e+06	3.08292e+06	3.26397e+06	2.87295e+06	4.41417e+06	0	3.56535e+06
Q9Z2D1	Myotubularin-related protein 2 OS=Mus musculus OX=10090 GN=Mtmr2 PE=1 SV=3	cell organization and biogenesis;metabolic process;regulation of biological process	cytoplasm;cytosol;endosome;membrane;nucleus	catalytic activity;protein binding	Mtmr2	Metabolic pathways; Inositol phosphate metabolism; Phosphatidylinositol signaling system		6.89531e+07	7.95052e+07	8.48144e+07	6.70479e+07	8.4703e+07	8.57893e+07	8.6159e+07	9.04798e+07	8.58543e+07	8.0116e+07
Q6NZC7	SEC23-interacting protein OS=Mus musculus OX=10090 GN=Sec23ip PE=1 SV=2	cell organization and biogenesis;transport	endoplasmic reticulum;Golgi;membrane	catalytic activity;metal ion binding;protein binding;RNA binding	Sec23ip			1.57468e+06	1.68597e+06	1.63745e+06	2.00406e+06	2.47297e+06	2.24734e+06	1.93875e+06	2.25716e+06	2.13714e+06	1.85034e+06
Q8K124	Pleckstrin homology domain-containing family O member 2 OS=Mus musculus OX=10090 GN=Plekho2 PE=1 SV=1				Plekho2			9.37225e+06	8.59792e+06	1.00864e+07	1.05519e+07	1.1898e+07	1.11312e+07	1.05444e+07	1.23492e+07	1.14292e+07	1.06943e+07
Q80XR2	Calcium-transporting ATPase type 2C member 1 OS=Mus musculus OX=10090 GN=Atp2c1 PE=1 SV=2	cell organization and biogenesis;cellular homeostasis;regulation of biological process;response to stimulus;transport	Golgi;membrane	catalytic activity;metal ion binding;nucleotide binding;signal transducer activity;transporter activity	Atp2c1			7.27066e+06	9.40687e+06	6.92627e+06	6.31445e+06	5.88076e+06	9.21569e+06	5.69591e+06	5.63575e+06	1.18119e+07	7.42564e+06
Q99J83	Autophagy protein 5 OS=Mus musculus OX=10090 GN=Atg5 PE=1 SV=1	cell communication;cell death;cell organization and biogenesis;cellular homeostasis;defense response;metabolic process;regulation of biological process;response to stimulus	cytoplasm;cytosol;membrane;vacuole	catalytic activity;protein binding	Atg5	NOD-like receptor signaling pathway; RIG-I-like receptor signaling pathway; Longevity regulating pathway; Autophagy; Longevity regulating pathway - multiple species		7.92958e+06	7.87982e+06	8.40959e+06	6.53824e+06	9674600	9.16056e+06	8.85924e+06	9.68538e+06	8.72447e+06	8.50055e+06
Q9D1I2	Caspase recruitment domain-containing protein 19 OS=Mus musculus OX=10090 GN=Card19 PE=1 SV=1	regulation of biological process	endoplasmic reticulum;membrane;mitochondrion		1110007C09Rik; Card19			6.90838e+07	7.8012e+07	8.3189e+07	9.89915e+07	6.80763e+07	9.08562e+07	8.43587e+07	7.61157e+07	1.02679e+08	8.75405e+07
Q91VJ1	Interferon-inducible protein AIM2 OS=Mus musculus OX=10090 GN=Aim2 PE=1 SV=2	cell death;defense response;regulation of biological process;response to stimulus;transport	cytoplasm;cytosol;mitochondrion;nucleus	DNA binding;protein binding	Aim2	NOD-like receptor signaling pathway; Cytosolic DNA-sensing pathway		1.67375e+07	2.29949e+07	1.99563e+07	1.85013e+07	2.08362e+07	2.30301e+07	1.6753e+07	2.19437e+07	2.6578e+07	2.17098e+07
Q4PJX1	Protein odr-4 homolog OS=Mus musculus OX=10090 GN=Odr4 PE=1 SV=2	metabolic process	membrane	catalytic activity;metal ion binding	BC003331			3.16698e+07	2.39124e+07	1.90429e+07	1.89683e+07	4.36333e+07	3.66035e+07	3.99097e+07	2.14063e+07	2.16217e+07	3.28327e+07
P23475	X-ray repair cross-complementing protein 6 OS=Mus musculus OX=10090 GN=Xrcc6 PE=1 SV=5	cell organization and biogenesis;defense response;metabolic process;regulation of biological process;response to stimulus	chromosome;cytoplasm;membrane;nucleus	catalytic activity;DNA binding;nucleotide binding;protein binding;RNA binding	Xrcc6	Non-homologous end-joining		1.04391e+07	9.53192e+06	1.03382e+07	8.28843e+06	1.25147e+07	1.14359e+07	1.09509e+07	1.26203e+07	1.1443e+07	1.03007e+07
Q8VE97	Serine/arginine-rich splicing factor 4 OS=Mus musculus OX=10090 GN=Srsf4 PE=2 SV=1	cell differentiation;metabolic process;regulation of biological process	nucleus	RNA binding	Srsf4		mRNA processing	6.97828e+06	5.7927e+06	5.5525e+06	4.7891e+06	9.62141e+06	7.41307e+06	7.76643e+06	3.84846e+06	9.7412e+06	7.56661e+06
Q61136	Serine/threonine-protein kinase PRP4 homolog OS=Mus musculus OX=10090 GN=Prpf4b PE=1 SV=3	metabolic process	chromosome;nucleus;spliceosomal complex	catalytic activity;nucleotide binding;RNA binding	Prpf4b		mRNA processing	2.43875e+06	2.27615e+06	2.19415e+06	0	2.53335e+06	1.40298e+06	2.94239e+06	2.1595e+06	1.84137e+06	2.1248e+06
Q91X21	Uncharacterized protein KIAA2013 OS=Mus musculus OX=10090 GN=Kiaa2013 PE=1 SV=1		membrane		2510039O18Rik			1.59976e+07	9.41048e+06	1.15082e+07	2.05672e+07	1.56462e+07	2.03279e+07	1.66042e+07	1.34011e+07	1.62322e+07	1.4522e+07
Q9JIX8	Apoptotic chromatin condensation inducer in the nucleus OS=Mus musculus OX=10090 GN=Acin1 PE=1 SV=3	cell death;cell differentiation;cell organization and biogenesis;metabolic process;regulation of biological process	cytosol;membrane;nucleus	RNA binding	Acin1	mRNA surveillance pathway; Spliceosome; RNA transport	mRNA processing	2.34624e+06	2.61319e+06	2.40773e+06	2.42834e+06	3.01109e+06	2.25299e+06	1.81087e+06	2.0628e+06	2.01113e+06	6.05969e+06
Q9FLQ3	GTP-binding nuclear protein Ran-4 OS=Arabidopsis thaliana OX=3702 GN=RAN4 PE=3 SV=1	regulation of biological process;response to stimulus;transport	cytoplasm;nucleus	catalytic activity;nucleotide binding	RAN4	RNA transport; Ribosome biogenesis in eukaryotes		2.64783e+08	2.56526e+08	3.14905e+08	2.307e+08	3.19603e+08	3.02554e+08	3.35001e+08	3.44202e+08	2.64756e+08	2.90101e+08
Q8C2E4	Pentatricopeptide repeat-containing protein 1, mitochondrial OS=Mus musculus OX=10090 GN=Ptcd1 PE=2 SV=2	metabolic process	mitochondrion;organelle lumen	RNA binding	Ptcd1			5.33163e+07	4.76335e+07	5.63369e+07	3.95024e+07	6.5504e+07	5.80516e+07	6.42949e+07	6.06638e+07	4.93132e+07	5.82499e+07
Q7TSE6	Serine/threonine-protein kinase 38-like OS=Mus musculus OX=10090 GN=Stk38l PE=1 SV=2	metabolic process;regulation of biological process;response to stimulus	cytoplasm;cytoskeleton;cytosol;membrane	catalytic activity;metal ion binding;nucleotide binding;protein binding	Stk38l			2.59892e+07	2.76141e+07	2.77707e+07	2.25984e+07	2.75486e+07	2.74764e+07	3.13579e+07	2.73141e+07	3.50651e+07	2.44789e+07
Q7TSZ8	Nucleus accumbens-associated protein 1 OS=Mus musculus OX=10090 GN=Nacc1 PE=1 SV=1	cell organization and biogenesis;metabolic process;regulation of biological process	cytoplasm;nucleus	protein binding	Nacc1		PluriNetWork	1.49982e+08	1.52582e+08	199289895	1.13173e+08	203594826	1.71529e+08	180315408	218474899	1.4985e+08	1.86534e+08
Q8BUK6	Protein Hook homolog 3 OS=Mus musculus OX=10090 GN=Hook3 PE=1 SV=2	cell organization and biogenesis;regulation of biological process;transport	cytoplasm;cytoskeleton;cytosol;Golgi	catalytic activity;motor activity;protein binding;transporter activity	Hook3			4.74723e+06	7.04849e+06	4.58291e+06	6.6886e+06	7.3432e+06	7.58163e+06	7.74358e+06	7.07466e+06	6.86746e+06	4.40856e+06
Q03267	DNA-binding protein Ikaros OS=Mus musculus OX=10090 GN=Ikzf1 PE=1 SV=2	cell differentiation;cell organization and biogenesis;development;metabolic process;regulation of biological process	cytoplasm;nucleus	DNA binding;metal ion binding;protein binding;RNA binding	Ikzf1			1.18758e+07	10790140	1.29928e+07	1.09975e+07	16065650	1.31096e+07	1.54996e+07	1.41003e+07	1.23813e+07	1.43628e+07
Q8BG60	Thioredoxin-interacting protein OS=Mus musculus OX=10090 GN=Txnip PE=1 SV=1	cell differentiation;metabolic process;regulation of biological process;response to stimulus;transport	cytoplasm;cytosol;nucleus	enzyme regulator activity;protein binding	Txnip	NOD-like receptor signaling pathway		8.5756e+07	7.82935e+07	7.9828e+07	6.53811e+07	8.33379e+07	9.46382e+07	9.87816e+07	8.72769e+07	7.51165e+07	7.88458e+07
Q8BMG7	Rab3 GTPase-activating protein non-catalytic subunit OS=Mus musculus OX=10090 GN=Rab3gap2 PE=1 SV=2	regulation of biological process;transport	cytoplasm;cytosol;membrane	enzyme regulator activity;protein binding	Rab3gap2			4.65671e+06	3.9013e+06	4.02417e+06	5.20789e+06	2659868	4.89849e+06	3.74781e+06	3.83192e+06	5.08814e+06	5.07062e+06
Q80SY5	Pre-mRNA-splicing factor 38B OS=Mus musculus OX=10090 GN=Prpf38b PE=1 SV=1	metabolic process	nucleus;spliceosomal complex	RNA binding	Prpf38b	Spliceosome		9.41817e+06	1.11787e+07	1.15288e+07	1.06953e+07	1.26801e+07	1.18549e+07	1.18347e+07	1.36281e+07	1.12391e+07	1.28749e+07
P06795	ATP-dependent translocase ABCB1 OS=Mus musculus OX=10090 GN=Abcb1b PE=1 SV=1	response to stimulus;transport	membrane;mitochondrion	catalytic activity;nucleotide binding;transporter activity	Abcb1b	MicroRNAs in cancer; ABC transporters; Bile secretion		1.97897e+06	2.5786e+06	1.81015e+06	2.12883e+06	2.71871e+06	1.96261e+06	3.17218e+06	1.90892e+06	2.25569e+06	3.11311e+06
Q8VDK1	Deaminated glutathione amidase OS=Mus musculus OX=10090 GN=Nit1 PE=1 SV=2	metabolic process	cytoplasm;mitochondrion;nucleus	catalytic activity	Nit1			3.21254e+07	4.34396e+07	3.66532e+07	3.62785e+07	3.92161e+07	4.17726e+07	4.7798e+07	3.57838e+07	4.36652e+07	3.8731e+07
O88958	Glucosamine-6-phosphate isomerase 1 OS=Mus musculus OX=10090 GN=Gnpda1 PE=1 SV=3	metabolic process;transport	cytoplasm	catalytic activity	Gnpda1	Metabolic pathways; Amino sugar and nucleotide sugar metabolism		1.8909e+07	1.70996e+07	1.33143e+07	1.4792e+07	1.83165e+07	1.96761e+07	1.9112e+07	1.50448e+07	1.75277e+07	1.9851e+07
D3Z6Q9	Bridging integrator 2 OS=Mus musculus OX=10090 GN=Bin2 PE=1 SV=1	cell organization and biogenesis;cellular component movement;response to stimulus	cytoplasm;membrane	protein binding	Bin2			2.3932e+06	1.87245e+06	2.46336e+06	0	3362505	2.48143e+06	2.76371e+06	2.06419e+06	1.83565e+06	2.01913e+06
Q61425	Hydroxyacyl-coenzyme A dehydrogenase, mitochondrial OS=Mus musculus OX=10090 GN=Hadh PE=1 SV=2	metabolic process;regulation of biological process;response to stimulus	cytoplasm;membrane;mitochondrion;organelle lumen	catalytic activity;nucleotide binding	Hadh	Fatty acid metabolism; Tryptophan metabolism; Valine, leucine and isoleucine degradation; Metabolic pathways; Lysine degradation; Fatty acid degradation; Butanoate metabolism; Fatty acid elongation	Fatty Acid Beta Oxidation; Fatty Acid Biosynthesis; Mitochondrial LC-Fatty Acid Beta-Oxidation; Tryptophan metabolism	5.59044e+06	7.6634e+06	6.11024e+06	7.27188e+06	7.22683e+06	6.61107e+06	8.66389e+06	6.72906e+06	7.51898e+06	7.93846e+06
P18242	Cathepsin D OS=Mus musculus OX=10090 GN=Ctsd PE=1 SV=1	cell organization and biogenesis;metabolic process	extracellular;membrane;mitochondrion;vacuole	catalytic activity	Ctsd	Tuberculosis; Lysosome; Sphingolipid signaling pathway; Apoptosis		306771	234773	255493	272870	289319	253366	322008	343937	246021	338260
Q3E8L3	Probable FBD-associated F-box protein At5g38565 OS=Arabidopsis thaliana OX=3702 GN=At5g38565 PE=2 SV=2		nucleus	protein binding	AT5G38565			3222749155	3790814640	3132022464	3108239516	3165865142	4227666777	3306979103	3587130452	3422593469	3618435462
Q9WU62	Inner centromere protein OS=Mus musculus OX=10090 GN=Incenp PE=1 SV=2	cell division	chromosome;cytoplasm;cytoskeleton;cytosol;nucleus		Incenp			6.1658e+06	5.65655e+06	1.98671e+06	3.02077e+06	5.07288e+06	3.85207e+06	5.16673e+06	6.53489e+06	3.52486e+06	5.14773e+06
Q9JKL4	NADH dehydrogenase [ubiquinone] 1 alpha subcomplex assembly factor 3 OS=Mus musculus OX=10090 GN=Ndufaf3 PE=1 SV=1	cell organization and biogenesis	membrane;mitochondrion;nucleus		Ndufaf3			33152486	4.79035e+07	5.40994e+07	4.5888e+07	65121325	5.94446e+07	5.53927e+07	6.57958e+07	5.19571e+07	3.96827e+07
Q6PHQ8	N-alpha-acetyltransferase 35, NatC auxiliary subunit OS=Mus musculus OX=10090 GN=Naa35 PE=1 SV=1	cell proliferation;metabolic process;regulation of biological process	cytoplasm	catalytic activity;protein binding	Naa35			2.54152e+08	1.96436e+08	2.02596e+08	1.49233e+08	2.24873e+08	217786098	2.53542e+08	2.3848e+08	200600904	2.25099e+08
Q99N85	28S ribosomal protein S18a, mitochondrial OS=Mus musculus OX=10090 GN=Mrps18a PE=2 SV=1	cell organization and biogenesis;metabolic process	mitochondrion;ribosome	structural molecule activity	Mrps18a	Ribosome		3.70288e+07	4.12907e+07	3.5402e+07	3.46968e+07	3.96172e+07	4.5905e+07	4.16711e+07	2.71134e+07	4.59646e+07	4.71568e+07
Q9CWZ7	Gamma-soluble NSF attachment protein OS=Mus musculus OX=10090 GN=Napg PE=1 SV=1	cell organization and biogenesis;transport	membrane;mitochondrion	protein binding	Napg			1.19295e+07	1.45091e+07	1.95732e+07	3.56112e+06	17263207	1.42353e+07	1.53418e+07	1.56878e+07	11789946	1.67996e+07
Q8BW70	Ubiquitin carboxyl-terminal hydrolase 38 OS=Mus musculus OX=10090 GN=Usp38 PE=1 SV=2	metabolic process		catalytic activity	Usp38			6.43597e+07	6.36276e+07	7.2974e+07	6.67629e+07	9.09079e+07	7.97509e+07	6.75453e+07	8.4722e+07	9.12658e+07	7.28901e+07
P20060	Beta-hexosaminidase subunit beta OS=Mus musculus OX=10090 GN=Hexb PE=1 SV=2	cell organization and biogenesis;cellular component movement;cellular homeostasis;metabolic process;regulation of biological process;reproduction;response to stimulus	membrane;vacuole	catalytic activity;protein binding	Hexb	Glycosphingolipid biosynthesis - globo and isoglobo series; Metabolic pathways; Lysosome; Amino sugar and nucleotide sugar metabolism; Glycosphingolipid biosynthesis - ganglio series; Glycosaminoglycan degradation; Other glycan degradation		6.35584e+06	7.06428e+06	1.40068e+07	6.65846e+06	1.22075e+07	1.09929e+07	1.41315e+07	1.084e+07	7.87802e+06	7.28569e+06
Q9ET26	E3 ubiquitin-protein ligase RNF114 OS=Mus musculus OX=10090 GN=Rnf114 PE=1 SV=2	cell differentiation;development;metabolic process;regulation of biological process	cytoplasm;cytosol;membrane;nucleus	catalytic activity;metal ion binding;protein binding	Rnf114			5.74054e+07	6.88408e+07	6.67758e+07	5.65313e+07	6.9824e+07	8.18484e+07	7.32587e+07	6.12057e+07	6.39221e+07	7.24683e+07
[truncated: 1,782 more rows]
