# Supplementary material for: Chemoproteomics-based target profiling of sinomenine reveals multiple protein regulators of inflammation
Source: Royal Society of Chemistry journal article supplement (doi:10.1039/d1cc01522b), 2021-01-01
Supplement: d1cc01522b3.pdf [file d1cc01522b3.pdf]

## Supporting Information

### Chemoproteomics-based target profiling of sinomenine reveals multiple protein regulators of inflammation

Lianguo Chen, Hong-jian Wang, Teng-fei Ji,\* Chong-Jing Zhang\*

\* Correspondence to:

[jtf@imm.ac.cn](mailto:jtf@imm.ac.cn)

[zhangchongjing@imm.ac.cn](mailto:zhangchongjing@imm.ac.cn)

## Contents

|                                                                                                                                         |    |
|-----------------------------------------------------------------------------------------------------------------------------------------|----|
| Materials.....                                                                                                                          | 4  |
| Cell culture.....                                                                                                                       | 4  |
| The chemical synthesis of SIN derivative (SIN-Y1).....                                                                                  | 4  |
| The anti-inflammatory activity test of SIN derivative (SIN-Y1).....                                                                     | 5  |
| The chemical synthesis of SIN-based probe (SIN-CW).....                                                                                 | 5  |
| Activity detection of SIN-CW .....                                                                                                      | 6  |
| The in-gel fluorescence labeling of SIN-CW in RAW 264.7 .....                                                                           | 6  |
| Pull-down assay.....                                                                                                                    | 7  |
| Trypsin digestion on beads.....                                                                                                         | 7  |
| LC-MS/MS analysis.....                                                                                                                  | 8  |
| Westen blot analysis.....                                                                                                               | 9  |
| Enrichment analysis.....                                                                                                                | 9  |
| RNA interference for genes knockdown.....                                                                                               | 9  |
| RNA extraction and quantification.....                                                                                                  | 10 |
| Levels of inflammatory cytokines (TNF- $\alpha$ , IL-1 $\beta$ , and IL-6) in the supernatant of each group were detected by ELISA..... | 11 |
| Statistics.....                                                                                                                         | 12 |
| References.....                                                                                                                         | 12 |

## Supplementary Figures and Tables

|                                                                                      |    |
|--------------------------------------------------------------------------------------|----|
| Figure S1. The $^1\text{H}$ NMR spectrum of SIN-Y1 in $\text{CDCl}_3$ .....          | 13 |
| Figure S2. The $^{13}\text{C}$ NMR spectrum of SIN-Y1 in $\text{CDCl}_3$ .....       | 13 |
| Figure S3. The mass spectrum of SIN-Y1.....                                          | 14 |
| Figure S4. Effects of SIN and SIN-Y1 on the secretions of IL-1 $\beta$ in cells..... | 14 |
| Figure S5. The $^1\text{H}$ NMR spectrum of SIN-CW in $\text{CDCl}_3$ .....          | 15 |
| Figure S6. The $^{13}\text{C}$ NMR spectrum of SIN-CW in $\text{CDCl}_3$ .....       | 15 |
| Figure S7. The high-resolution mass spectrum of SIN-CW.....                          | 16 |
| Figure S8. Uncropped gels/blots.....                                                 | 16 |

|                                                                                                                                                                                                                                                                        |           |
|------------------------------------------------------------------------------------------------------------------------------------------------------------------------------------------------------------------------------------------------------------------------|-----------|
| <b>Figure S9.</b> Validation of the covalent labeling of SIN-CW probe on Ripk3 in the cell lysate.....                                                                                                                                                                 | <b>17</b> |
| <b>Figure S10.</b> Bubble charts of KEGG pathway analysis.....                                                                                                                                                                                                         | <b>17</b> |
| <b>Figure S11.</b> Bubble charts of GO analysis.....                                                                                                                                                                                                                   | <b>18</b> |
| <b>Figure S12.</b> Selection of the most effective siRNA for corresponding gene.....                                                                                                                                                                                   | <b>19</b> |
| <b>Figure S13.</b> The secretion of TNF- $\alpha$ , IL-1 $\beta$ and IL-6 in LPS-stimulated RAW 264.7 cells after transfection with siRNA-NC and SIN treatment.....                                                                                                    | <b>19</b> |
| <b>Figure S14.</b> The secretion of TNF- $\alpha$ , IL-1 $\beta$ and IL-6 in LPS-stimulated RAW 264.7 cells after transfection with designated siRNA ( <i>Ptges3</i> , <i>Prdx4</i> and <i>Dbnl</i> ) and SIN treatment.....                                           | <b>20</b> |
| <b>Figure S15.</b> The secretion of TNF- $\alpha$ , IL-1 $\beta$ and IL-6 in LPS-stimulated RAW 264.7 cells after transfection with designated siRNA ( <i>Snx5</i> , <i>Dld</i> , <i>Ddx27</i> , <i>Utp18</i> , <i>Myh11</i> and <i>Syne3</i> ) and SIN treatment..... | <b>21</b> |
| <b>Figure S16.</b> The secretion of TNF- $\alpha$ , IL-1 $\beta$ and IL-6 in LPS-stimulated RAW 264.7 cells after transfection with designated siRNA ( <i>Ncaph</i> and <i>Psm6</i> ) and SIN treatment.....                                                           | <b>22</b> |
| <b>Table S1.</b> Lists of 14 hits targeted only in the probe group and with effective siRNA for subsequent gene knockdown experiments.....                                                                                                                             | <b>23</b> |
| <b>Table S2.</b> The level of TNF- $\alpha$ , IL-1 $\beta$ and IL-6 in cells after knockdown of the designated genes ( <i>Ripk3</i> , <i>Ptges3</i> , <i>Prdx4</i> or <i>Dbnl</i> ).....                                                                               | <b>23</b> |
| <b>Table S3.</b> The level of TNF- $\alpha$ , IL-1 $\beta$ and IL-6 in cells after knockdown of the designated genes ( <i>Snx5</i> , <i>Dld</i> , <i>Ddx27</i> , <i>Utp18</i> , <i>Myh11</i> , <i>Syne3</i> or <i>Adh5</i> ).....                                      | <b>24</b> |
| <b>Table S4.</b> The level of TNF- $\alpha$ , IL-1 $\beta$ and IL-6 in cells after knockdown of the designated genes ( <i>Ncaph</i> , <i>Trmt2a</i> or <i>Psm6</i> ).....                                                                                              | <b>26</b> |

## Materials

Sinomenine, SIN-Y1 and SIN-CW were extracted and synthesized in our lab. They were dissolved in DMSO (Sigma-Aldrich, MO, USA) to a final concentration of 300  $\mu$ M and stocked in -20 °C for subsequent research. Tris [(1-benzyl-1H-1, 2, 3-triazol-4-yl) methyl] amine (TBTA, 510758-28-8), and Tris (2-carboxyethyl) phosphine (TCEP) were purchased from Sigma-Aldrich (St. Louis, MO, USA). The TAMRA-azide and biotin-PEG3-azide (CAS: 875770-34-6) were purchased from Click Chemistry Tools, LLC (Scottsdale, AZ, USA).  $\text{CuSO}_4$  was purchased from Beijing Chemical Factory (Beijing, China). Pierce Streptavidin Agarose Resins (20353) were purchased from Thermo Scientific. LPS was purchased from Sigma-Aldrich (USA) and lipofectamine RNAiMAX reagent (13778150) was purchased from Invitrogen (USA). Ripk3 Polyclonal antibody (17563-1-AP) was purchased from Proteintech. Mouse TNF- $\alpha$  Elisa kits (Liv, CK-E20852), IL-6 Elisa kits (Liv, CK-E20188) and IL-1 $\beta$  Elisa kits (Liv, CK-E20174) were purchased from Beijing Bizi Biotechnology Co. LTD. The other Mouse TNF- $\alpha$  Elisa kits and IL-6 Elisa kits were purchased from R&D Systems Inc. and Novus Biologicals, LLC., respectively. The siRNAs were designed and synthesized by Genepharma Company (Suzhou, China).

## Cell culture

RAW 264.7 cell was purchased from China Infrastructure of Cell Line Resource (Beijing, China). These cells were grown in the Dulbecco's Modified Eagle's Medium-F12 basic medium (Invitrogen, CA, USA) supplemented with 10% inactivated fetal bovine serum (FBS, Invitrogen) and cultured at 5%  $\text{CO}_2$  and 37 °C.

## The chemical synthesis of SIN derivative (SIN-Y1)

The synthetic route of SIN-Y1 is shown in **Figure 1a** according to our previous report <sup>1</sup>. Sinomenine hydrochlorid 2 g (5.46 mmol), 10% Pd-C 400 mg, and five drops of hydrochloric acid were dissolved in methanol (65 mL) under the pressure of 1.8  $\text{kg}/\text{cm}^{-2}$ , and the reaction was finished after 6 h. The solution was then filtered through Celite and evaporated to dryness. The sample was dissolved with chloroform, adjusting to pH=7 by saturated sodium bicarbonate solution. The mixture was purified by column chromatography on silica gel eluted with dichloromethane: methanol (50:1-20:1, with 2‰ ammonia) to get SIN-Y1 as white solid with 71.2% yield. Analytical data for the purified probe in the spectra of <sup>1</sup>H NMR and <sup>13</sup>C NMR (**Figure S1** and **Figure S2**) were shown as follows:

$^1\text{H}$  NMR (400 MHz,  $\text{CDCl}_3$ )  $\delta$  6.65 (1H, d,  $J$  = 8.30 Hz, H-2), 6.56 (1H, d,  $J$  = 8.30 Hz, H-1), 6.25 (1H, br s, -OH), 4.27 (1H, d,  $J$  = 13.00 Hz, H-5a), 3.92 (1H, dd,  $J$  = 12.00, 6.80 Hz, H-7), 3.81 (3H, s, 3-OCH<sub>3</sub>), 3.41 (3H, s, 7-OCH<sub>3</sub>), 3.16 (1H, br s, H-9), 2.96 (1H, d,  $J$  = 18.70 Hz, H-10a), 2.80 (1H, dd,  $J$  = 18.70, 6.30 Hz, H-10b), 2.68-2.53 (2H, m, H-16), 2.51 (3H, s, -NCH<sub>3</sub>), 2.28 (1H, d,  $J$  = 12.90 Hz, H-5b), 2.22-2.15 (2H, m, H-8), 1.96-1.94 (2H, m, H-15), 1.65-1.55 (1H, m, H-14).  $^{13}\text{C}$  NMR (125 MHz,  $\text{CDCl}_3$ )  $\delta$  207.11, 145.45, 144.96, 128.71, 121.56, 118.79, 109.65, 83.32, 58.18, 57.59, 56.28, 48.49, 46.90, 43.17, 42.19, 41.45, 37.24, 34.35, 23.75. MS-ESI ( $m/z$ ): 332.20 [ $M + \text{H}$ ]<sup>+</sup>.

### The anti-inflammatory activity test of SIN derivative (SIN-Y1)

To determine the anti-inflammatory activity of SIN-Y1, RAW 264.7 cells were seeded at  $5 \times 10^5$  cells/well in 24-well plates for 24 h and pretreated with SIN (10  $\mu\text{M}$  or 100  $\mu\text{M}$ ), SIN-Y1 (10  $\mu\text{M}$  or 100  $\mu\text{M}$ ) and isopyknic DMSO for 1 h, respectively. Treated cells were further incubated with LPS (0.01 or 0.1  $\mu\text{g/mL}$ ) for 12 h. The cell supernatant were collected and kept at -20 °C before analysis. The levels of TNF- $\alpha$  (**Figure 1b**) and IL-1 $\beta$  (**Figure S4**) in the supernatant were diluted and measured by Elisa kit according to the manufacturer's instructions.

### The chemical synthesis of SIN-based probe (SIN-CW)

The synthetic route of SIN-CW is shown in **Figure 1c**. To a stirred mixture in dry acetonitrile (6 mL) of SIN (131.6 mg, 0.4 mmol) and potassium tert-butyl alcohol (44.8 mg, 0.4 mmol) was added propargyl bromide (70.8 mg, 0.6 mmol) in dry acetonitrile (2.4 mL) dropwise over 45 min. The reaction mixture was stirred for 8 h at room temperature. The reaction was monitored by TLC. After filtration, the filtrate was evaporated under reduced pressure. Then the compound was separated and purified readily by HPLC. The mobile phase system for eluting was composed of water solution containing 0.1% trifluoroacetic acid (Solvent A) and acetonitrile containing 0.1% trifluoroacetic acid (Solvent B) with a flow rate of 3 mL/min. The protocol for the gradient eluting was listed as follows: 0-5 min, 4% B; 5-70 min, 4-30% B. The desired elution was combined, concentrated and lyophilized to give the SIN-based probe (20.5 mg). The structure of purified probe was verified by  $^1\text{H}$ -NMR (500 MHz,  $\text{CDCl}_3$ ) and  $^{13}\text{C}$ -NMR (125 MHz,  $\text{CDCl}_3$ ) at room temperature. Analytical data for the purified probe in the spectra of  $^1\text{H}$  NMR and  $^{13}\text{C}$  NMR (**Figure S5 and Figure S6**) were shown as follows:  $^1\text{H}$  NMR (500 MHz,  $\text{CDCl}_3$ )  $\delta$ : 6.75 (1H, d,  $J$  = 8.3 Hz, H-2), 6.64 (1H, d,  $J$  = 8.3 Hz, H-1), 5.49 (1H, d,  $J$  = 2.1 Hz, H-8), 4.94 (2H, br s, H<sub>2</sub>-1'), 4.39 (1H, d,  $J$  = 15.7 Hz,

H-5a), 3.83 (3H, s, 3-OCH<sub>3</sub>), 3.71 (1H, d, *J* = 7.0 Hz, H-16a), 3.60 (1H, m, H-16b), 3.50 (3H, s, 7-OCH<sub>3</sub>), 3.40-3.45 (1H, m, H-9), 2.94 (1H, s, H-3'), 2.78-2.84 (1H, m, H-10a), 2.63 (3H, s, -NCH<sub>3</sub>), 2.63 (1H, d, *J* = 15.7 Hz, H-5b); 2.20-2.27 (1H, m, H-10b), 2.10-2.14 (1H, m, H-14), 1.24 (1H, d, *J* = 2.3 Hz, H-15b), 1.23 (1H, d, *J* = 7.0 Hz, H-15a). <sup>13</sup>C NMR (125 MHz, CDCl<sub>3</sub>) δ: 191.6, 152.5, 146.1, 144.5, 124.0, 119.2, 118.7, 110.2, 110.1, 82.2, 70.6, 66.4, 55.9, 55.2, 55.0, 51.6, 50.4, 46.5, 40.6, 39.1, 38.7, 27.3. HRMS (ESI) calculated for C<sub>22</sub>H<sub>25</sub>NO<sub>4</sub> [M + H]<sup>+</sup> 368.18564, found 368.18563.

### **Activity detection of SIN-CW**

To determine the effect of SIN and SIN-CW on the viability of RAW 264.7 cell, cells were seeded at 1 × 10<sup>5</sup> cells/well in 96-well plates for 24 h, followed by incubation with different concentrations of SIN and SIN-CW (0.1 nM, 1 nM, 10 nM, 100 nM, 1 μM, 10 μM, 100 μM and 1000 μM) for 24 h. The viability of the cells was determined using the MTT assay and the absorbance was measured at 450 nm.

To determine the anti-inflammatory activity of SIN and SIN-CW on RAW 264.7 cells, cells were seeded at 1 × 10<sup>5</sup> cells/well in 96-well plates for 24 h and pretreated with SIN (0.1, 0.5, 1, 5, 10, 50, 100 or 300 μM), SIN-CW (0.1, 0.5, 1, 5, 10, 50, 100 or 300 μM) and isopyknic DMSO for 1 h, respectively. Treated cells were further incubated with LPS (0.01 μg/mL) for 12 h. And the levels of TNF-α and IL-6 in the collected cell supernatant were measured by Elisa kits according to the manufacturer's instructions.

### **The in-gel fluorescence labeling of SIN-CW in RAW 264.7**

Raw 264.7 cells were cultured in the 6-well plates and grown to 90% confluence before they were harvested with cell Scraper and collected by centrifuge at 1000 g for 3 min. The cell pellets were re-suspended in 300 μL lysis buffer and lyzed by sonication (25% amplification, 5 seconds on and 2 seconds off for 4 cycles). After that, the protein lysis was centrifuged (4°C, 14000 g) for 30 min and then divided into 5 equal portions of 40 μL. Each sample was added 50 μL PBS and incubation with 10 μL different concentrations of SIN-CW (0, 100, 500, 1000 and 3000 μM) for 1 h. Then each sample was added 90 μL PBS (containing 1% protease inhibitor) and 8 μL click buffer, including 4 μL TAMRA-azide (10 mM in DMSO), 2 μL TBTA (10 mM in DMSO) and 2 μL TCEP (100 mM in ddH<sub>2</sub>O). A total 198 μL mixtures were gently vortexed before adding 2 μL CuSO<sub>4</sub> (100 mM in ddH<sub>2</sub>O). The mixture was then shaken (400 rpm) in an incubation shaker at 37 °C for 1 h. The labeled proteins were precipitated by adding 800 μL prechilled acetone and washed the pellets with 500 μL ice-cold methanol twice. The

pellets were air-dried, followed by addition of 40  $\mu$ L 0.4% SDS-PBS and 10  $\mu$ L 5  $\times$  SDS loading buffer to dissolve the proteins. The samples were denatured by heating at 95  $^{\circ}$ C for 10 min and subsequently separated in 10% SDS-PAGE gel. The fluorescence gels were imaged using Typhoon FLA 9500 laser scanner (GE Healthcare Bio-Sciences, Piscataway, NJ) and stained with coomassie brilliant blue for visualization the total proteins.

For the competitive labeling assay, cell lysate samples were treated with high and different concentration of SIN (200, 400, 800, 1600, 3200 and 6400  $\mu$ M) for 60 min before incubating with SIN-CW (200  $\mu$ M), then treated as described above.

### **Pull-down assay**

We identified the targets of SIN through a gel-free ABPP. Raw 264.7 cells were cultured in the 6-well plates and grown to 90% confluence before incubation with SIN-CW (100  $\mu$ M) for 1 h. Then, these cells were harvested, lysed as according to the procedure mentioned in the section of **The in-gel fluorescence labeling of SIN-CW in RAW 264.7**. After that, as much volume of protein lysis buffer was collected as possible, followed by addition of PBS (containing 1% protease inhibitor) to a total 190  $\mu$ L reaction volume. Then, 4  $\mu$ L biotin-PEG3-azide (10 mM in DMSO), 2  $\mu$ L TBTA (10 mM in DMSO) and 2  $\mu$ L TCEP (100 mM in ddH<sub>2</sub>O) were added for every protein sample. Then, 2  $\mu$ L CuSO<sub>4</sub> (100 mM in ddH<sub>2</sub>O) was added in the pre-mixtures above to initiate the cycloaddition. The mixtures were incubated and shaken in an incubation shaker (400 rpm, 37  $^{\circ}$ C) for 1 h. The labeled proteins were precipitated by adding 800  $\mu$ L prechilled acetone and washed the pellets with 500  $\mu$ L ice-cold methanol twice. The pellets were air-dried, followed by addition of 800  $\mu$ L 0.4% SDS-PBS and added 50  $\mu$ L streptavidin-beads. After rotating incubation for 3 h at RT, these beads were collected by centrifuge at 2500 g for 5 min, and washed successively with 1 mL 0.4% SDS-PBS three times, 1 mL 6 M Urea for twice and 1 mL PBS three times, for subsequent experiment.

### **Trypsin digestion on beads**

Following the pull down assay, the beads were re-suspended in 500  $\mu$ L 6 M Urea/PBS solution and then added 25  $\mu$ L dithiothreitol (DTT, 200 mM). The mixture in PE tube was incubated and shocked in 65  $^{\circ}$ C water bath for 15 min. Then, the mixture was incubated and shocked in 35  $^{\circ}$ C water bath for 30 min prior to the addition of iodoacetamide (IAA, 25  $\mu$ L, 400 mM). After adding 950  $\mu$ L ddH<sub>2</sub>O, the mixture was

centrifuged (1400 g, 4 °C) for 3 min. After discarding the supernatant, the beads were added 200 µL 2 M Urea/PBS solution, 2 µL 100 mM CaCl<sub>2</sub> and 4 µL 500 ng/µL trypsin (Promega, MADISON, WI, USA), followed by incubating and shaking overnight at 37 °C. The supernatant was collected after centrifugation (1400 g) for 3 min, the beads were washed by 50 µL ddH<sub>2</sub>O twice. The three portions of supernatant were merged together, followed by addition of formic acid to a final concentration of 1% formic acid. Samples were desalted by using Pierce<sup>TM</sup> C18 Tips (100 µL, Thermo) according to the instructions and subsequently dried in a lyophilizer. Then, the peptide obtained from each sample was dissolved in 10 µL ddH<sub>2</sub>O. The solution was then thoroughly vortexed and centrifuged (13200 rpm) for 10 min at 4 °C. The supernatant (6 µL) was injected into mass spectrometry machine for analysis

### **LC-MS/MS analysis**

The peptides were analyzed by using Orbitrap Fusion Lumos mass spectrometer (Thermo fisher scientific, USA). After loading on a trap packed with Thermo Scientific<sup>TM</sup> Acclaim<sup>TM</sup> PepMap<sup>TM</sup> 100 C18 column (0.3 mm × 5 mm, 5 µm particle size), the chromatographic separation of peptides (6 µL) was carried out on an Acclaim PepMap RSLC C18 column (50 µm × 15 cm, 2 µm particle size) the column temperature was set at 40 °C. The mobile phase is composed of buffer A (water solution containing 0.1% formic acid) and buffer B (an aqueous solution containing 80% acetonitrile and 0.08% formic acid) with a flow rate of 0.3 µL/min. The protocol for the gradient eluting was listed as follows: 0-5 min, 4% B; 5-70 min, 4~30% B; 70-75 min, 30~80% B; 75-80 min, 80% B; 80-85 min, 80~4% B; 80-85 min, 4% B. MS parameters were listed as follows: resolution, 60000; AGC target, 400000; maximum IT (ms), 50; scan range (m/z), 350 to 1500; Target FDR (strict) for PSMs, 0.01; Min. Precursor mass, 350 Da; Max. Precursor mass, 5000 Da. MS<sup>2</sup> parameter were listed as follows: resolution, 15000; AGC target, 5.0e4; maximum IT (ms), 30; HCD Collision Energy (%): 30.

The obtained raw mass spectrometric data was inputted into the Thermo Proteome Discoverer 2.3 software for searching the specific protein information in the uniprot-mouse database. The parameters of “Sequest HT” were set as follows: Trypsin (Full) was selected as the digestion enzyme. Max. Missed Cleavage Sites was 2, Min. Peptide Length was 6 and Max. Peptide Length was 144. Precursor Mass Tolerance was 10 ppm and Fragment Mass Tolerance was 0.02 Da. The modification of Carbamidomethyl/+57.021 Da in cysteine was set in Static Modification section.



### **Western blot analysis**

To validate the protein targets identified by LC-MS/MS, we randomly selected Ripk3 for western blotting experiment. Raw 264.7 cells were cultured in the 10-cm dishes and grown to 90% confluence before they were harvested and lysed. Then, 90  $\mu$ L each protein lysis sample was incubated with 10  $\mu$ L different concentrations of SIN-CW (0, 30, 300 and 3000  $\mu$ M) for 1 h, respectively. After that, the click chemistry step and pull-down experiment were carried out as mentioned in the section of **Pull-down assay**. After eluting at 95°C for 20 min, these bound proteins enriched with streptavidin beads were separated on a 10% SDS-PAGE gel and immunoblotted with Ripk3 Polyclonal antibody (**Figure S9**).

### **Enrichment analysis**

#### ***KEGG pathway***

The Database for Annotation, Visualization and Integrated Discovery (DAVID) was used for the KEGG analysis. First of all, the 92 target genes were inputted in the upload section, and then “uniprot accession” was selected as identifier before submitting the gene list. Secondly, the species option was selected as “Mus musculus”. Then, above gene list was analyzed with functional annotation tool. In annotation summary results section, KEGG pathway was selected.

#### ***GO enrichment analysis***

GO enrichment analysis results were also obtained in DAVID as mentioned above. 92 target genes list was analyzed with functional annotation tool. Three analysis items were selected in annotation summary results: cell components, molecular functions, and biological processes. Finally, we obtained the results of the GO analysis. There were 25 cellular components were identified when corrected by a  $P$  value  $\leq$  0.05 (**Figure S11a**). The top ten cellular components (ranked by  $P$  value) are nucleus, extracellular exosome, nucleolus, small-subunit processome, cytoplasm, Pwp2p-containing subcomplex of 90S preribosome, nuclear speck, spliceosomal complex, nucleoplasm and cell-cell adherens junction in turn. Meanwhile, 25 biological processes were identified when corrected by a  $P$  value  $\leq$  0.05 (**Figure S11b**) and the top ten including mRNA processing, RNA processing, rRNA processing, RNA splicing, cell-cell adhesion, maturation of SSU-rRNA from tricistronic rRNA transcript, cell redox homeostasis, oxidation-reduction process, cortical actin cytoskeleton organization and I-kappaB kinase/NF-kappaB signaling. Furthermore, 10 molecular functions were identified when corrected by a  $P$  value  $\leq$  0.05

(**Figure S11c**), including poly(A) RNA binding, RNA binding, nucleotide binding, mRNA binding, cadherin binding involved in cell-cell adhesion, oxidoreductase activity, 3'-5' exonuclease activity, snoRNA binding, ATP binding, NAD binding.

#### **RNA interference for genes knockdown**

Cells ( $5 \times 10^5$ /mL) were seeded in the 12 well plates and then grew for 12 h. Then, cells were transfected with 80 nM small interfering RNA (siRNA) of negative control (NC) or siRNA of every relative gene in the presence of 6  $\mu$ L lipofectamine<sup>TM</sup> 2000 RNAiMAX transfection reagent for 24h in 1 mL of complete growth medium DMEM containing 10% FBS, according to the manufacturer protocol.

Sequences of effective 14 siRNAs (**Figure S12**) were as follows:

siRipk3\_1: 5' CCACAGAACAUGGAACCAUTT 3'; siRipk3\_2: 5' AUGGUUCCAUGUUCUGUGGTT 3';  
siSnx5\_1: 5' GCAAAGGAUCUCUUGUAUATT 3'; siSnx5\_2: 5' UAUACAAGAGAUCUUUGCTT 3';  
siUtp18\_1: 5' GGAUCUCGUCAGUGCAGUUTT 3'; siUtp18\_2: 5' AACUGCACUGACGAGAUCCTT 3';  
siTrmt2a\_1: 5' CCAUGGCCAUUGCCUACUUTT 3'; siTrmt2a\_2: 5' AAGUAGGCAAUGGCCAUGGTT 3';  
siDdx27\_1: 5' GCGGGCAGCCACUACACUATT 3'; siDdx27\_2: 5' UAGUGUAGUGGCUGCCCGCTT 3';  
siDld\_1: 5' GCUGCAAACAGCAGAGCUATT 3'; siDld\_2: 5' UAGCUCUGCUGUUUGCAGCTT 3';  
siPtges3\_1: 5' CCAAUGAUUCCAAGCAUATT 3'; siPtges3\_2: 5' UAUGCUUGGAAUCAUUUGGTT 3';  
siPsm6\_1: 5' GCUUAUAUUGUGUGGCCUAUTT 3'; siPsm6\_2: 5' AUAGCCACACAAUAUAAGCTT 3';  
siPrdx4\_1: 5' CCGAAUCUCUGCAAGGCUUTT 3'; siPrdx4\_2: 5' AAGCCUUGCAGAGAUUCGGTT 3';  
siNcaph\_1: 5' CCGGGUUCAGUUUACUAATT 3'; siNcaph\_2: 5' UUAGUAAACUGGAACCCGTT 3';  
siAdh5\_1: 5' GGAUCAUUGGUAUCGACAUTT 3'; siAdh5\_2: 5' AUGUCGAUACCAAUGAUCCTT 3';  
siMyh11\_1: 5' GGGCUUCAUGAAGAGGAATT 3'; siMyh11\_2: 5' UCCUCUUAUUGAAGCCCTT 3';  
siSyne3\_1: 5' GGGCUUGAAGGAGAAGCAATT 3'; siSyne3\_2: 5' UUGCUUCUCCUUAAGCCCTT 3';  
siDbnl\_1: 5' CCAACUACAGCUUCCAUAATT 3'; siDbnl\_2: 5' UUAUGGAAGCUGUAGUUGGTT 3'.

#### **RNA extraction and quantification**

Total RNA of RAW 264.7 cells were lysed and isolated with TransZol Up Plus RNA Kit (TransGen Biotech, Beijing, China). The concentration of total RNA samples was detected by NanoPhotometer N50 (Implen, Germany). One microgram total RNA was used for reverse transcription using TransScript One-Step

gDNA Removal and cDNA Synthesis SuperMix kit (TransGen Biotech). cDNAs of each gene were quantified by real-time quantitative polymerase chain reaction (RT-qPCR). RT-qPCR was performed in the 7900HT96 fast real-time PCR system (Applied Biosystems, USA) using the transStart Tip Green qPCR SuperMix kit (TransGen Biotech, Beijing, China). The following system conditions were used: 1 cycle at 95 °C for 30 s, 40 cycles at 95 °C for 15 s and at 60 °C for 60 s, 1 cycle at 95 °C for 15 s, at 60 °C for 15 s and at 95 °C for 15 s. Quantifications of transcripts of the target genes were normalized to GAPDH level, and the relative expression of each target gene was calculated using the  $2^{-\Delta\Delta Ct}$  method. The following 15 primers were used: *Ripk3*: 5'tcaggagatggaagacacg and 5'ccgaactgtgcttggcctacac; *Syne3*: 5'tgcaggcagaaaactccaag and 5'gcagatcttccagctcgttg; *Ddx27*: 5'agaggctcccagttgaaatcct and 5'gccttctgtctgtgttgg; *Dbn1*: 5'gcagaaggaaaggcgaatgt and 5'agaagacagagtgtctaggcg; *Ptges3*: 5'gagaatccggccagtcag and 5'ctacatcctcatcaccacca; *Myh11*: 5'gctagatgaggccacagaga and 5'tgaagtctgagctcccgagc; *Utp18*: 5'tgggttactccttggcct and 5'ccctgccctttcattcct; *Snx5*: 5'caggaatgctgcagaagtt and 5'tcagagtagacaggtcagttgt; *Ncaph*: 5'aggctgtaccattctgacc and 5'agttggaggtgtcgtaggg; *Prdx4*: 5'ccactcttctgacctgaacc and 5'aaggctgaaccaaacgcag; *Prpf6*: 5'ggttccatcgcactgtgaag and 5'ttcccaatctcctctgcc; *Trmt2a*: 5'cacccattccatccagtc and 5'tcctgtgtcctatactccc; *Dld*: 5'tggggcaggagtaattgt and 5'ccatctgacttctgtgtggc; *Psmid6*: 5'ggggcagagatcctgaagt and 5'gacctatagattccagcagctg; *Gapdh*: 5'gtgttcctctgtcccgtaga and 5'gccgtgagtgagtcatact.

**Levels of inflammatory cytokines (TNF- $\alpha$ , IL-1 $\beta$ , and IL-6) in the supernatant of each group were detected by ELISA**

After the target protein in RAW 264.7 cell was specifically knocked down by corresponding siRNA (80 nM), the inflammatory cell model was induced by addition of LPS (0.1  $\mu$ g/mL) to these transfected cells. The RAW 264.7 cells were divided into seven groups: A group, normal cells; B group, inflammatory cell model induced by LPS; C group, inflammatory cell model induced by LPS + SIN; D group, cells transfected by siRNA-NC; E group, cells transfected by siRNA (target protein); F group, cells transfected by siRNA (target protein) + LPS; G group, cells transfected by siRNA (target protein) + LPS + SIN. The levels of released inflammatory factors (TNF- $\alpha$ , IL-1 $\beta$ , and IL-6) in the supernatant of the cells in each group were detected by ELISA. The ELISA procedure was carried out according to the instructions.

## Statistics

Data are represented as means  $\pm$  SD, the unpaired student *t*-test was used for two-group comparison.

When *p*-value was less than 0.05 recognized as statistically significant.

## References

1. C. J. Wei, F. Xu, M. J. Shi, J. W. Hu, J. J. Wang, B. Zhen, X. Wang, T. F. Ji, J. H. Wang, G. H. Du, *J. Asian Nat. Prod. Res.*, 2018, **20**, 277-291.

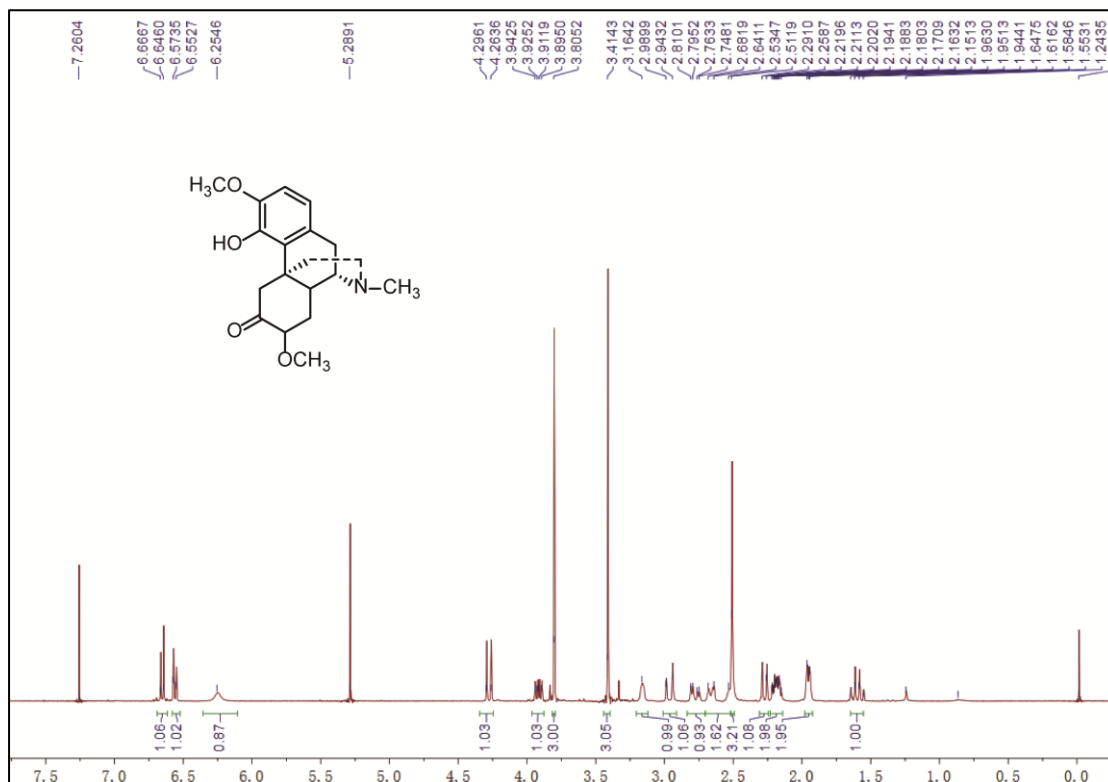

Figure S1. The <sup>1</sup>H NMR spectrum of SIN-Y1 in CDCl<sub>3</sub>.

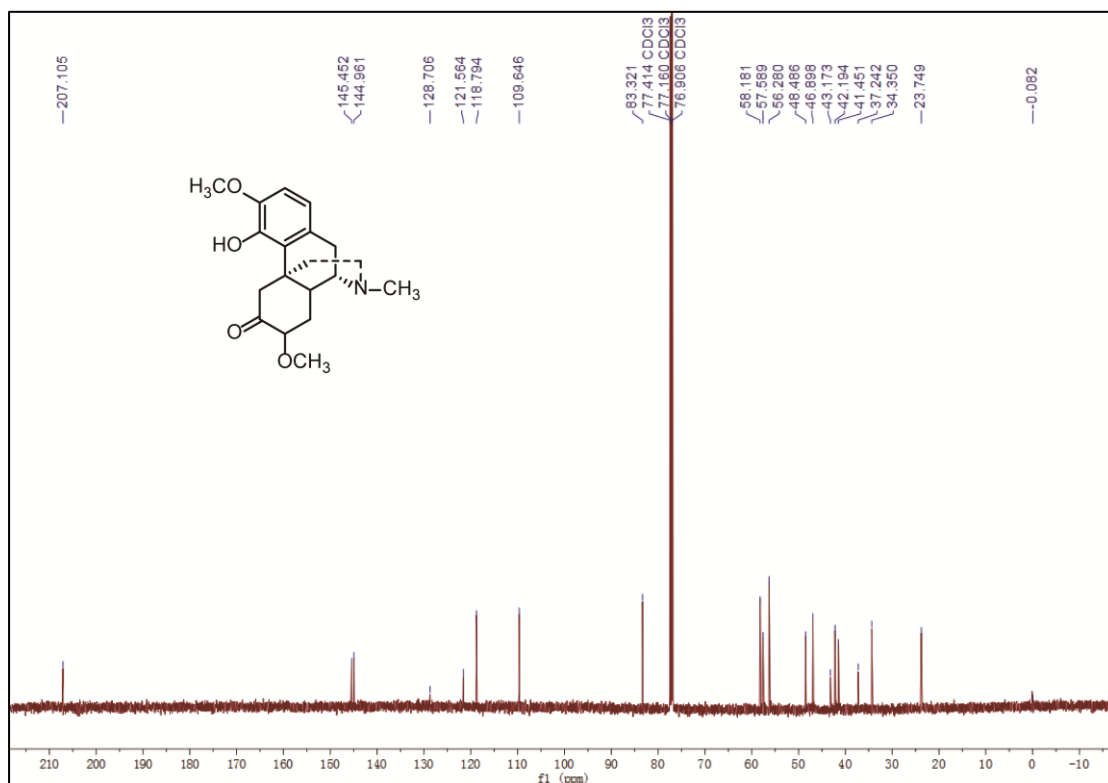

Figure S2. The <sup>13</sup>C NMR spectrum of SIN-Y1 in CDCl<sub>3</sub>.

|             |              |                        |                |                 |                                  |
|-------------|--------------|------------------------|----------------|-----------------|----------------------------------|
| Sample Name | WHJ-1-25     | Position               | P2-F2          | Instrument Name | Instrument 1                     |
| User Name   |              | Inj Vol                | 5              | InjPosition     |                                  |
| Sample Type | Sample       | IRM Calibration Status | Not Applicable | Data Filename   | WHJ-1-25.d                       |
| ACQ Method  | 95MEQH-NEG.m | Comment                |                | Acquired Time   | 11/9/2020 4:05:56 PM (UTC+08:00) |

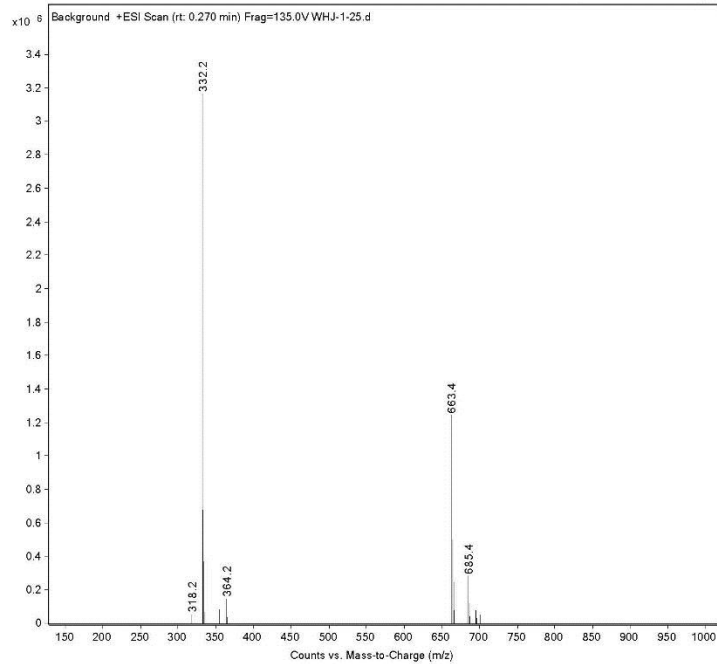

**Figure S3.** The mass spectrum of SIN-Y1.

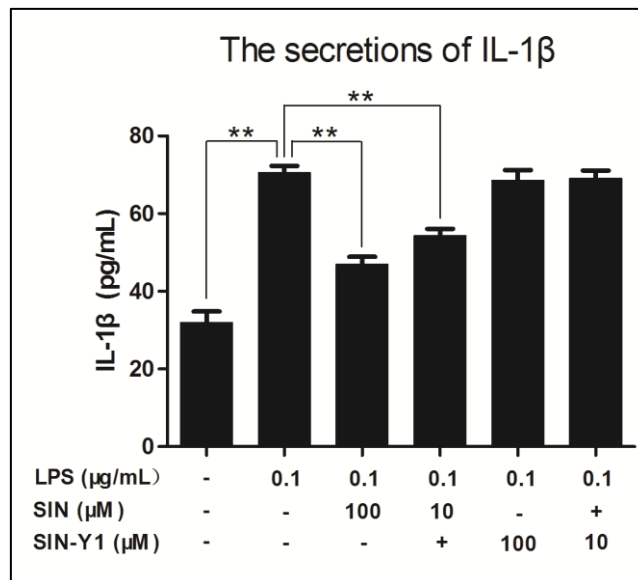

**Figure S4.** Effects of SIN and SIN-Y1 on the secretions of IL-1 $\beta$  in cells treated by two concentrations (10 and 100  $\mu$ M).

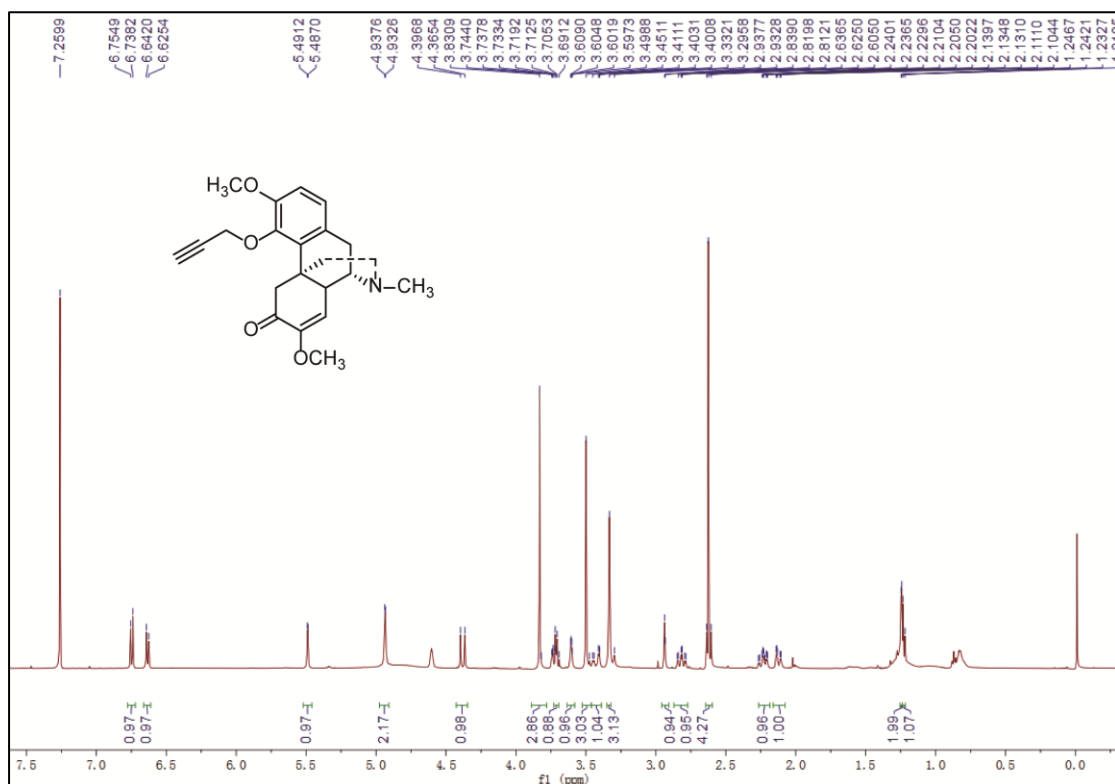

Figure S5. The  $^1\text{H}$  NMR spectrum of SIN-CW in  $\text{CDCl}_3$ .

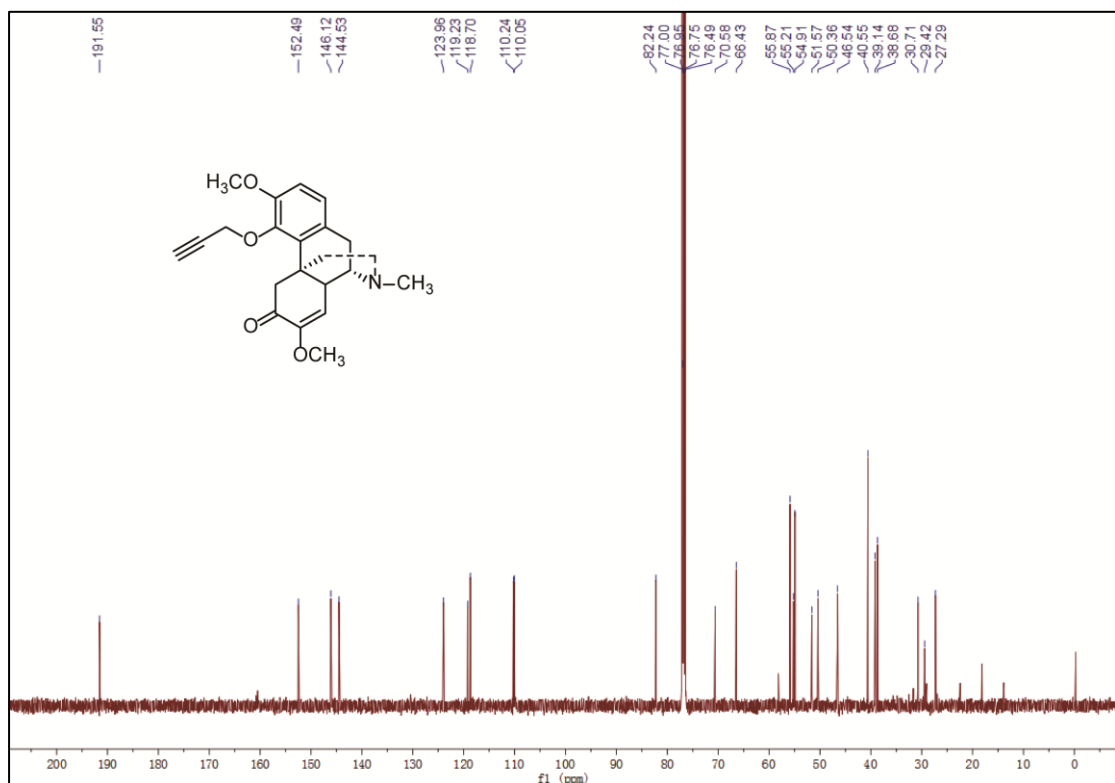

Figure S6. The  $^{13}\text{C}$  NMR spectrum of SIN-CW in  $\text{CDCl}_3$ .

| m/z       | Theo. Mass | Delta (ppm) | RDB equiv. | Composition                                      |
|-----------|------------|-------------|------------|--------------------------------------------------|
| 368.18564 | 368.18563  | 0.01        | 10.5       | C <sub>22</sub> H <sub>26</sub> O <sub>4</sub> N |

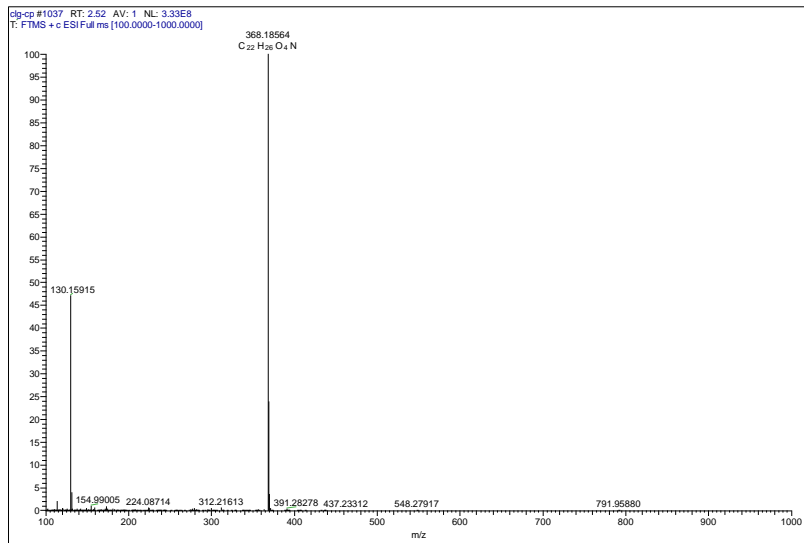

**Figure S7.** The high-resolution mass spectrum of SIN-CW.

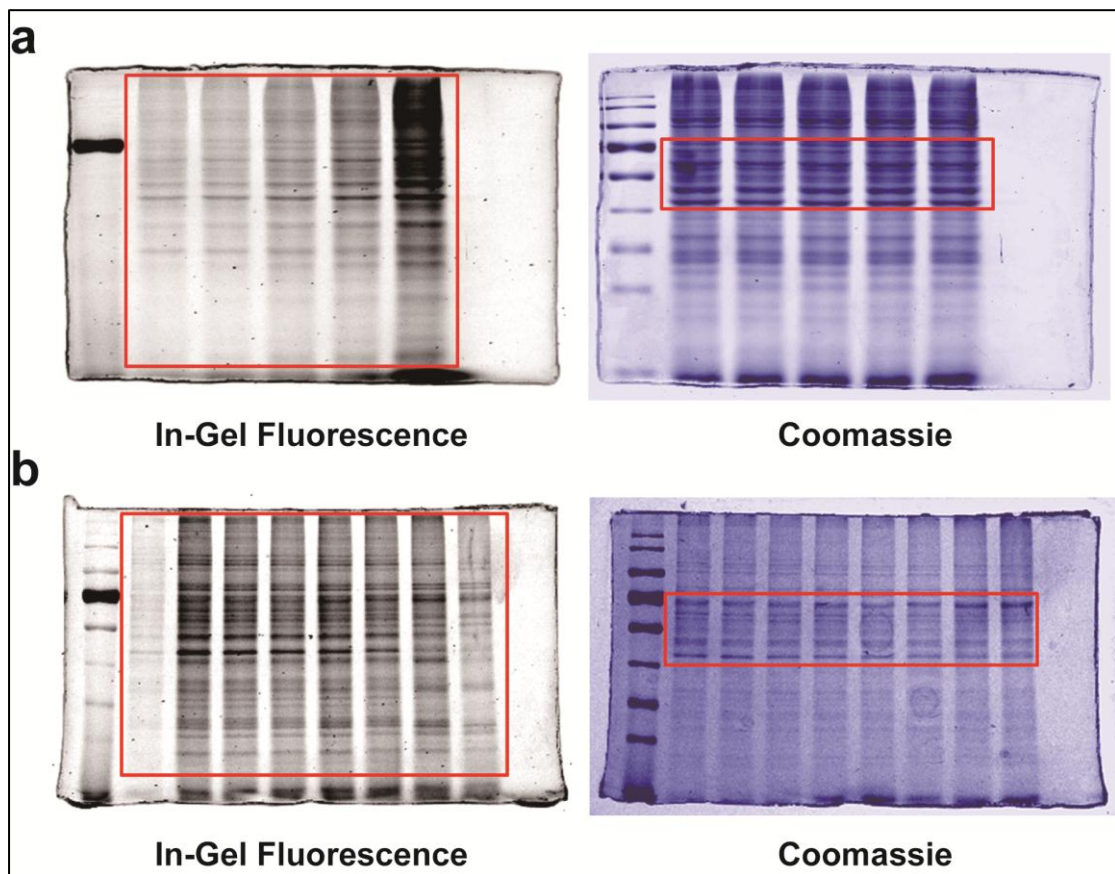

**Figure S8.** Uncropped gels/blots. (a) Concentration-dependent labeling of cell lysate by SIN-CW in SDS-PAGE gel *in vitro*. Left, the gel was scanned by Typhoon; Right, the gel was stained by coomassie



blue; (b) Comparative labeling of cell lysate by SIN and its probe in gel *in vitro*. Left, the gel was scanned by Typhoon; Right, the gel was stained by coomassie blue.

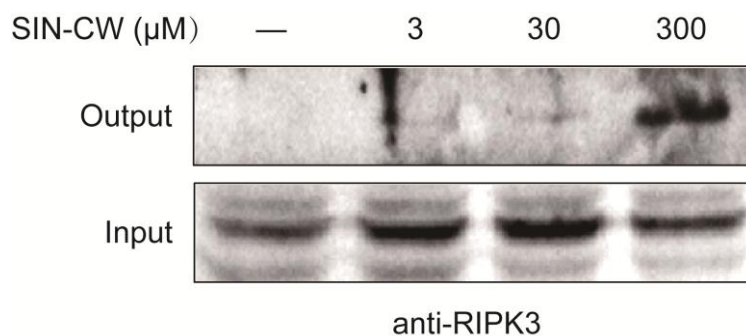

**Figure S9.** Validation of the covalent labeling of SIN-CW probe on Ripk3 in the cell lysate of RAW 264.7 cells. The labeled Ripk3 were conjugated with biotin through click chemistry ('input'), pulled down by streptavidin beads and eluted by boiling the beads at 95 °C ('output'). The input and output samples were analyzed by anti-Ripk3 immunoblotting.

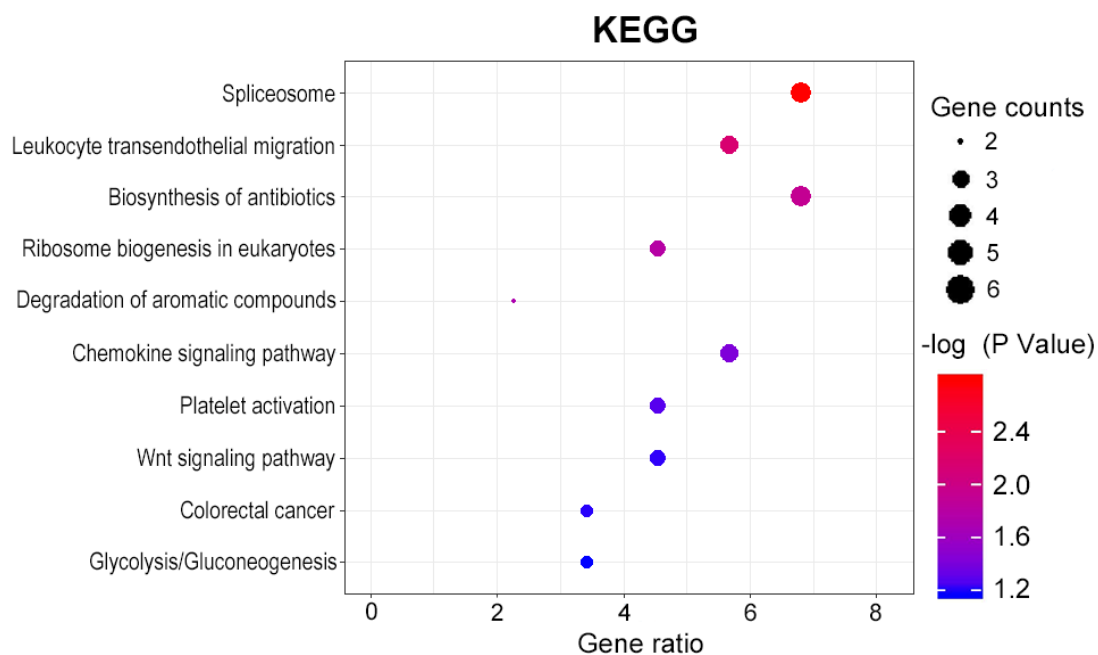

**Figure S10.** Bubble charts of KEGG pathway analysis. Note: pathway (Y axis), gene ratio (X axis), p value (colour) and gene counts (size).

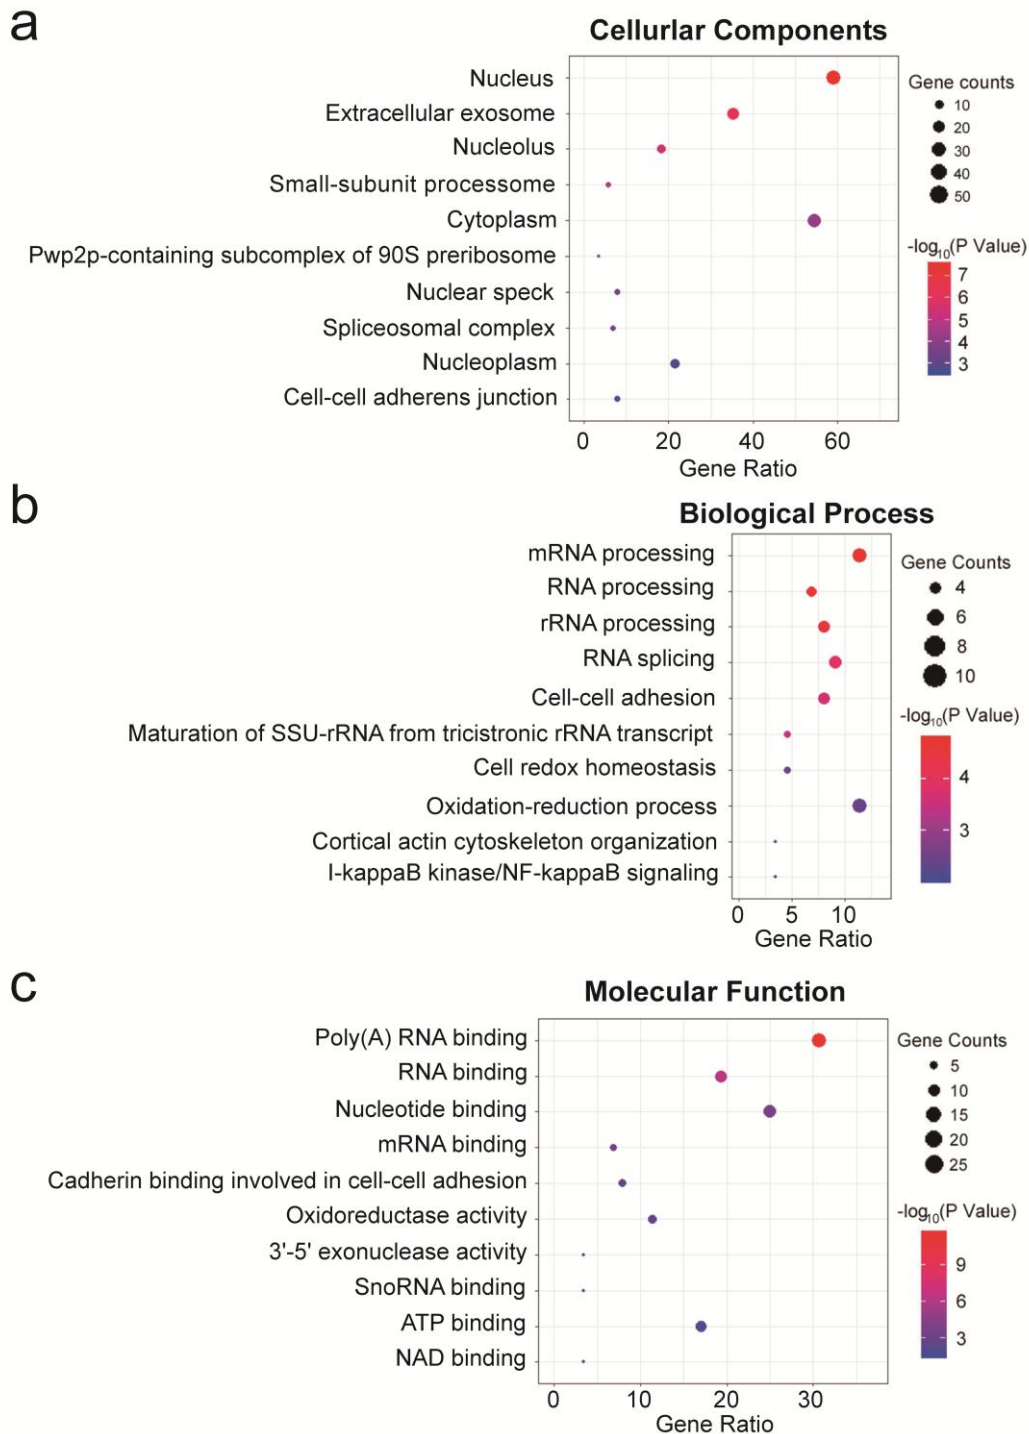

**Figure S11.** Bubble charts of GO analysis. (a) Cell components that the identified 92 proteins located. (b) Biological processes that the identified 92 proteins involved (c) Molecular functions that the identified 92 proteins involved. The cell components, biological processes or molecular functions served as Y axis. The gene ratio (the number of differentially expressed genes in relative channel/the number of differentially expressed genes in this channel) served as X axis. The color denoted  $\log_{10}(p \text{ value})$  and the size represents gene counts.

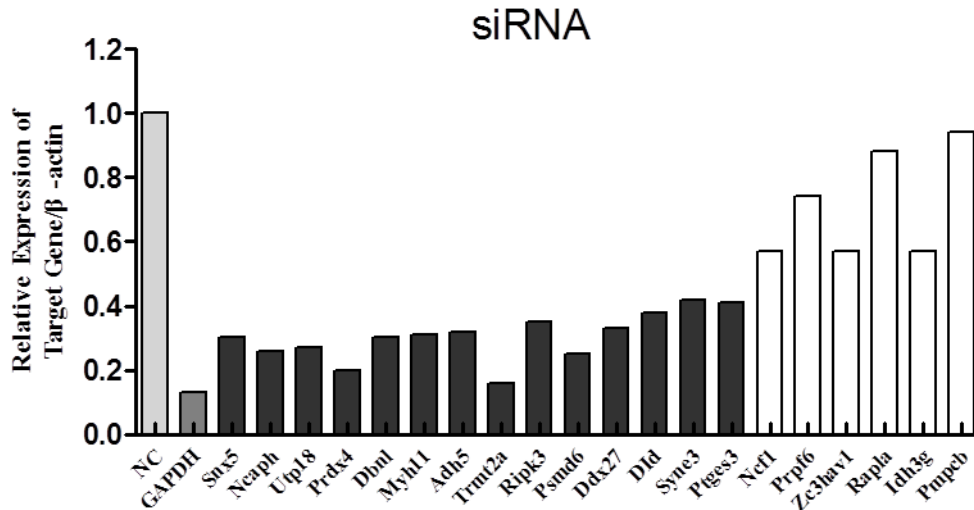

**Figure S12. Selection of effective siRNA for corresponding gene.**The relative mRNA level of 20 genes and *GAPDH* in RAW 264.7 cells was determined by RT-PCR after transfected with 80 nM effective siRNA (silencing efficacy > 50%) for corresponding gene, respectively.

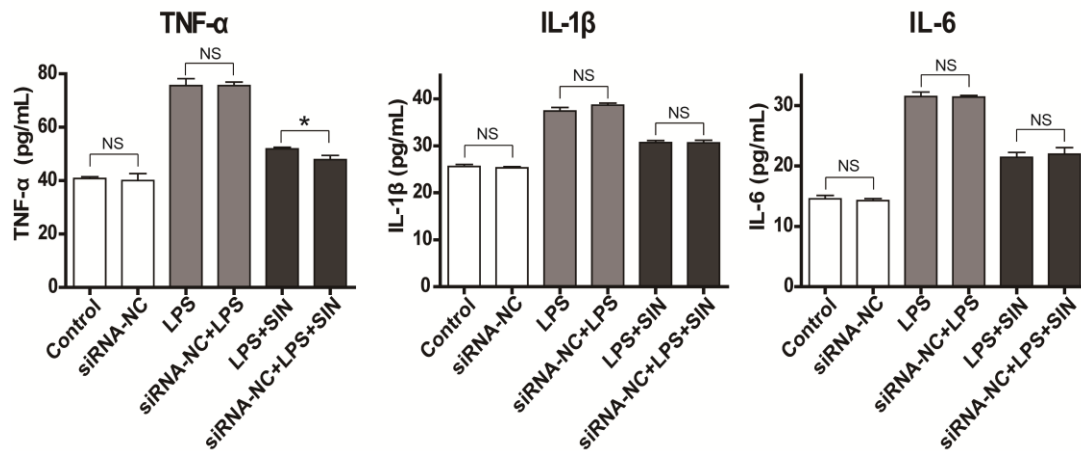

**Figure S13.** The secretion of TNF- $\alpha$ , IL-1 $\beta$  and IL-6 in LPS-stimulated RAW 264.7 cells after transfection with siRNA-NC and SIN treatment. *NS* Represents not statistically significant and *\** Represents  $P < 0.05$  between two groups.

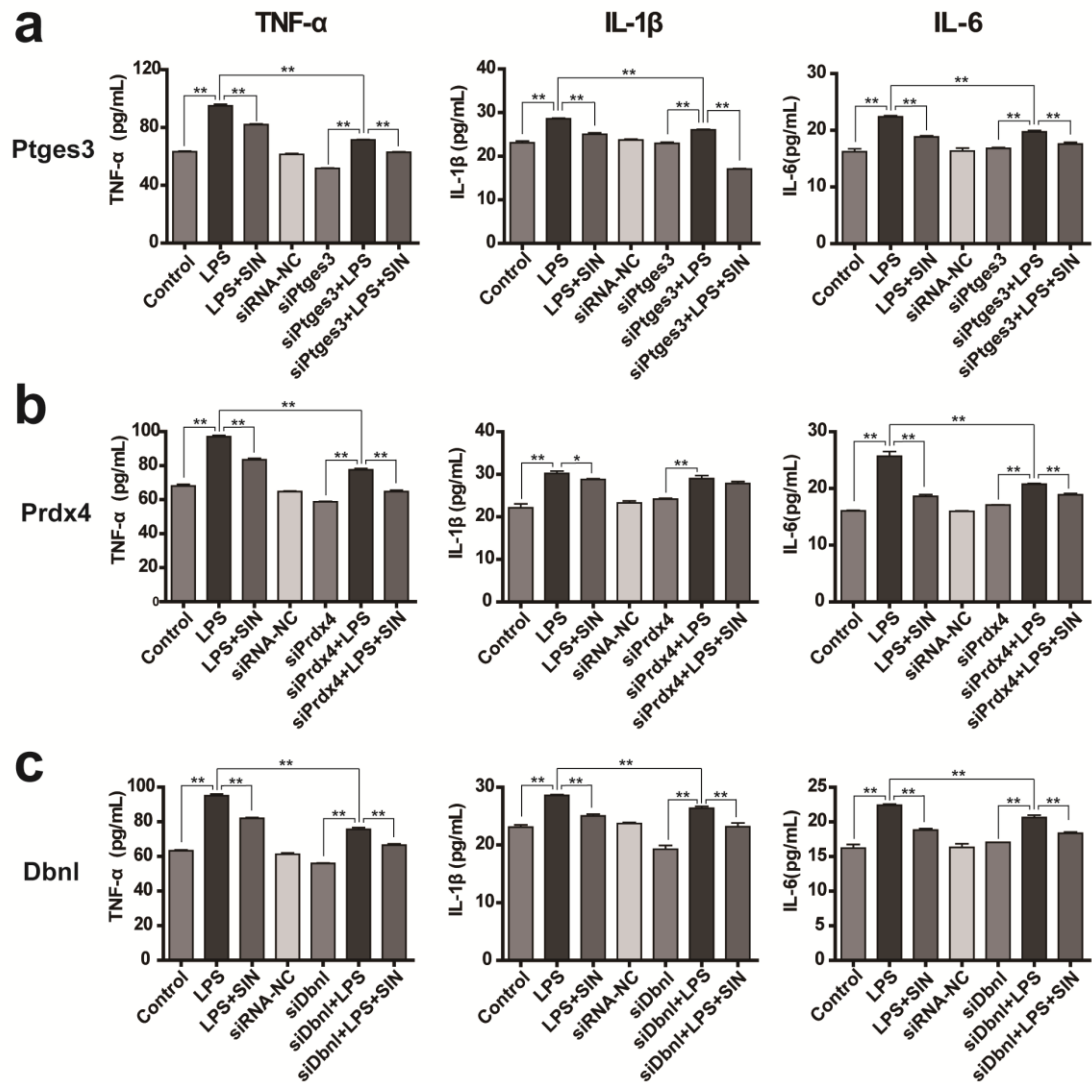

**Figure S14.** The secretion of TNF- $\alpha$ , IL-1 $\beta$  and IL-6 in LPS-stimulated RAW 264.7 cells after transfection with designated siRNA (*Ptges3*, *Prdx4* and *Dbnl*) and SIN treatment. Knockdown anyone of *Ptges3*, *Prdx4* and *Dbnl* in transcription level could decrease the overall expression of inflammatory cytokines in RAW 264.7 cells injured with LPS. \*Represents  $P < 0.05$  and \*\*Represents  $P < 0.01$  between two groups.

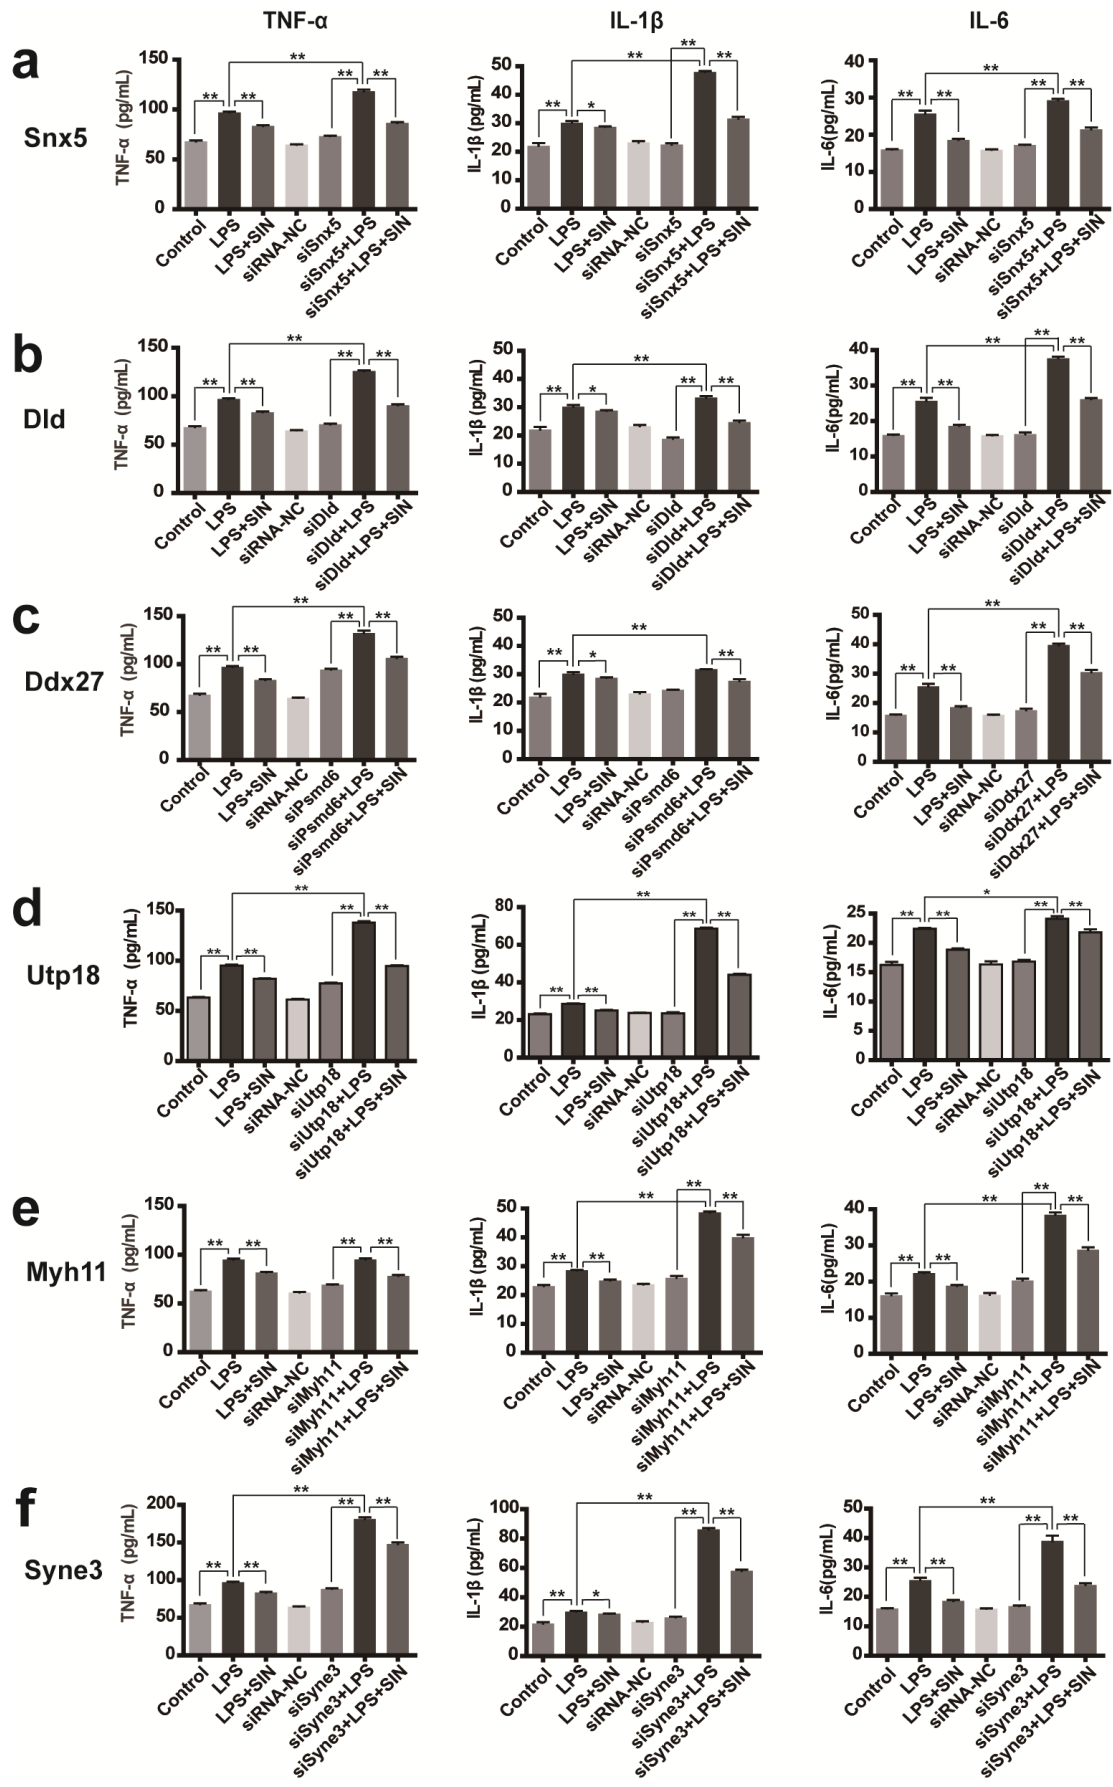

**Figure S15.** The secretion of TNF- $\alpha$ , IL-1 $\beta$  and IL-6 in LPS-stimulated RAW 264.7 cells after transfection with designated siRNA (*SNX5*, *Dld*, *Ddx27*, *Utp18*, *Myh11* and *Syne3*) and SIN treatment. Knockdown one of 6 genes in transcription level could increase the overall expression of inflammatory cytokines in RAW 264.7 cells injured with LPS. \*Represents  $P < 0.05$  and \*\*Represents  $P < 0.01$  between two groups.

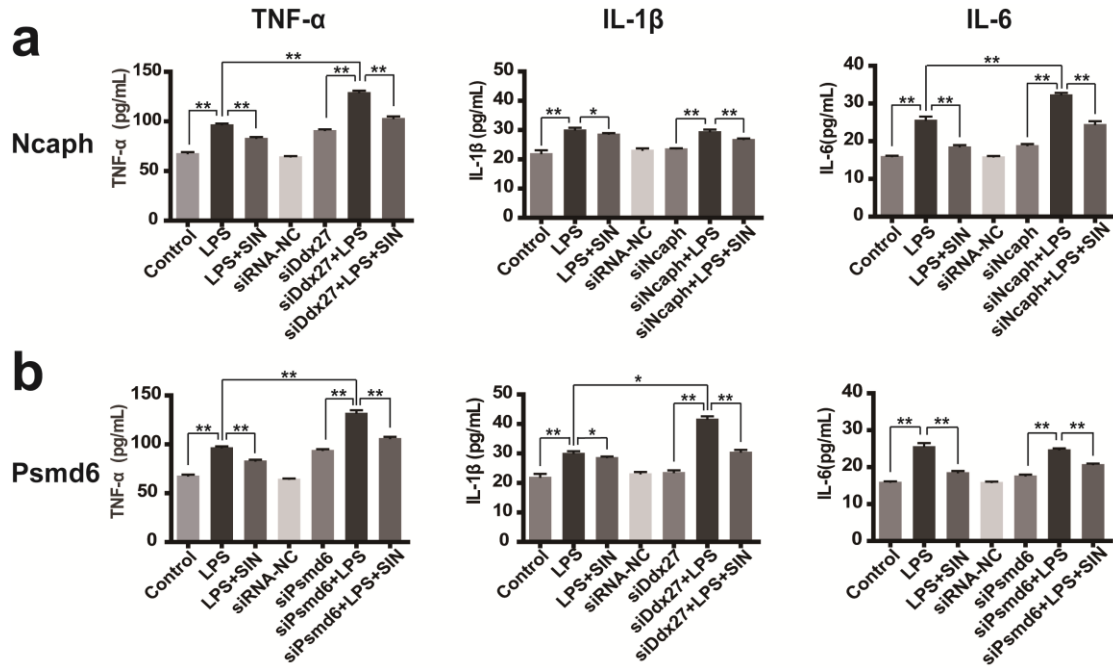

**Figure S16.** The secretion of TNF- $\alpha$ , IL-1 $\beta$  and IL-6 in LPS-stimulated RAW 264.7 cells after transfection with designated siRNA (*Ncaph* and *Psm66*) and SIN treatment. Knockdown one of *Ncaph* and *Psm66* in transcription level could change the expression of inflammatory cytokines in different manners in RAW 264.7 cells injured with LPS. \*Represents  $P < 0.05$  and \*\*Represents  $P < 0.01$  between two groups.

**Table S1. Lists of 14 hits targeted only in the probe group and with effective siRNA for subsequent gene knockdown experiments**

| Protein                                                | Gene name     | Fold Change <sup>a</sup> | P-value               |
|--------------------------------------------------------|---------------|--------------------------|-----------------------|
| Receptor-interacting serine/threonine-protein kinase 3 | <i>Ripk3</i>  | 999 ( $\infty$ )         | $1.05 \times 10^{-7}$ |
| 26S proteasome non-ATPase regulatory subunit 6         | <i>Psmc6</i>  | 999 ( $\infty$ )         | $1.83 \times 10^{-6}$ |
| Dihydrolipoyl dehydrogenase                            | <i>Dld</i>    | 999 ( $\infty$ )         | $5.6 \times 10^{-6}$  |
| Nesprin-3                                              | <i>Syne3</i>  | 999 ( $\infty$ )         | $2.28 \times 10^{-5}$ |
| tRNA (uracil-5-)-methyltransferase homolog A           | <i>Trmt2a</i> | 999 ( $\infty$ )         | 0.002386              |
| Peroxiredoxin-4                                        | <i>Prdx4</i>  | 999 ( $\infty$ )         | 0.002776              |
| Condensin complex subunit 2                            | <i>Ncaph</i>  | 999 ( $\infty$ )         | 0.004247              |
| Sorting nexin-5                                        | <i>Snx5</i>   | 999 ( $\infty$ )         | 0.004553              |
| U3 small nucleolar RNA-associated protein 18 homolog   | <i>Utp18</i>  | 999 ( $\infty$ )         | 0.006165              |
| Alcohol dehydrogenase class-3                          | <i>Adh5</i>   | 999 ( $\infty$ )         | 0.020269              |
| Myosin-11                                              | <i>Myh11</i>  | 999 ( $\infty$ )         | 0.022428              |
| Prostaglandin E synthase 3                             | <i>Ptges3</i> | 999 ( $\infty$ )         | 0.026051              |
| Drebrin-like protein                                   | <i>Dbnl</i>   | 999 ( $\infty$ )         | 0.026054              |
| Probable ATP-dependent RNA helicase DDX27              | <i>Ddx27</i>  | 999 ( $\infty$ )         | 0.040732              |

<sup>a</sup> The fold change represents the mean abundances of targeted protein in probe group compared with that in control group. The fold change of those proteins appeared only in probe group was denoted 999 ( $\infty$ ).

**Table S2. The level of TNF- $\alpha$ , IL-1 $\beta$  and IL-6 in cells after knockdown of the designated genes (*Ripk3*, *Ptges3*, *Prdx4* or *Dbnl*)**

| Gene          | Group           | TNF- $\alpha$      | IL-1 $\beta$       | IL-6               |
|---------------|-----------------|--------------------|--------------------|--------------------|
|               | control         | 63.294 $\pm$ 0.861 | 23.085 $\pm$ 0.696 | 16.210 $\pm$ 0.907 |
|               | LPS             | 95.064 $\pm$ 1.733 | 28.584 $\pm$ 0.260 | 22.400 $\pm$ 0.317 |
|               | LPS+SIN         | 81.995 $\pm$ 0.829 | 25.031 $\pm$ 0.533 | 18.826 $\pm$ 0.372 |
| <i>Ripk3</i>  | siRNA-NC        | 62.307 $\pm$ 0.783 | 23.702 $\pm$ 0.360 | 16.331 $\pm$ 0.902 |
|               | siRipk3         | 57.178 $\pm$ 1.074 | 18.437 $\pm$ 0.368 | 15.688 $\pm$ 0.054 |
|               | siRipk3+LPS     | 74.041 $\pm$ 1.795 | 21.709 $\pm$ 0.148 | 19.100 $\pm$ 0.078 |
|               | siRipk3+LPS+SIN | 66.621 $\pm$ 1.485 | 20.283 $\pm$ 0.263 | 16.644 $\pm$ 0.449 |
|               | control         | 63.294 $\pm$ 0.861 | 23.085 $\pm$ 0.696 | 16.210 $\pm$ 0.907 |
|               | LPS             | 95.064 $\pm$ 1.733 | 28.584 $\pm$ 0.260 | 22.400 $\pm$ 0.317 |
|               | LPS+SIN         | 81.995 $\pm$ 0.829 | 25.031 $\pm$ 0.533 | 18.826 $\pm$ 0.372 |
| <i>Ptges3</i> | siRNA-NC        | 62.307 $\pm$ 0.783 | 23.702 $\pm$ 0.360 | 16.331 $\pm$ 0.902 |

|              |                  |              |              |              |
|--------------|------------------|--------------|--------------|--------------|
|              | siPtges3         | 51.775±0.322 | 22.963±0.415 | 16.818±0.257 |
|              | siPtges3+LPS     | 71.467±0.265 | 26.043±0.234 | 19.719±0.438 |
|              | siPtges3+LPS+SIN | 62.883±0.533 | 17.054±0.178 | 17.595±0.466 |
|              | control          | 68.070±1.692 | 22.124±1.613 | 16.055±0.151 |
|              | LPS              | 97.022±1.537 | 30.186±0.978 | 25.697±1.407 |
|              | LPS+SIN          | 83.486±1.431 | 28.782±0.264 | 18.621±0.554 |
| <i>Prdx4</i> | siRNA-NC         | 65.752±1.898 | 23.284±0.761 | 15.978±0.157 |
|              | siPrdx4          | 58.766±0.477 | 24.160±0.306 | 17.083±0.031 |
|              | siPrdx4+LPS      | 77.573±1.293 | 28.970±1.299 | 20.762±0.278 |
|              | siPrdx4+LPS+SIN  | 64.784±1.301 | 27.851±0.745 | 18.893±0.403 |
|              | control          | 63.294±0.861 | 23.085±0.696 | 16.210±0.907 |
|              | LPS              | 95.064±1.733 | 28.584±0.260 | 22.400±0.317 |
|              | LPS+SIN          | 81.995±0.829 | 25.031±0.533 | 18.826±0.372 |
| <i>Dbn1</i>  | siRNA-NC         | 62.307±0.783 | 23.702±0.360 | 16.331±0.902 |
|              | siDbn1           | 55.983±0.414 | 19.268±1.118 | 17.036±0.009 |
|              | siDbn1+LPS       | 75.651±1.888 | 26.374±0.565 | 20.633±0.567 |
|              | siDbn1+LPS+SIN   | 66.550±1.117 | 23.168±1.115 | 18.350±0.317 |

**Table S3. The level of TNF- $\alpha$ , IL-1 $\beta$  and IL-6 in cells after knockdown of the designated genes (*Snx5*, *Dld*, *Ddx27*, *Utp18*, *Myh11*, *ADH5* or *Syne3*)**

| Gene        | Group          | TNF- $\alpha$ | IL-1 $\beta$ | IL-6         |
|-------------|----------------|---------------|--------------|--------------|
|             | control        | 68.070±1.692  | 22.124±1.613 | 16.055±0.151 |
|             | LPS            | 97.022±1.537  | 30.186±0.978 | 25.697±1.407 |
|             | LPS+SIN        | 83.486±1.431  | 28.782±0.264 | 18.621±0.554 |
| <i>Snx5</i> | siRNA-NC       | 65.752±1.898  | 23.284±0.761 | 15.978±0.157 |
|             | siSnx5         | 73.304±0.941  | 22.519±0.891 | 17.286±0.030 |
|             | siSnx5+LPS     | 118.372±2.763 | 48.016±0.580 | 29.267±0.701 |
|             | siSnx5+LPS+SIN | 86.553±1.211  | 31.626±1.091 | 21.467±0.898 |



|              |                 |               |              |              |
|--------------|-----------------|---------------|--------------|--------------|
|              | control         | 68.070±1.692  | 22.124±1.613 | 16.055±0.151 |
|              | LPS             | 97.022±1.537  | 30.186±0.978 | 25.697±1.407 |
|              | LPS+SIN         | 83.486±1.431  | 28.782±0.264 | 18.621±0.554 |
| <i>Dld</i>   | siRNA-NC        | 65.752±1.898  | 23.284±0.761 | 15.978±0.157 |
|              | siDld           | 70.887±1.297  | 18.840±0.788 | 16.286±0.822 |
|              | siDld+LPS       | 125.962±1.411 | 33.375±0.964 | 37.674±0.779 |
|              | siDld+LPS+SIN   | 90.629±1.593  | 24.748±0.898 | 26.140±0.573 |
|              | control         | 68.070±1.692  | 22.124±1.613 | 16.055±0.151 |
|              | LPS             | 97.022±1.537  | 30.186±0.978 | 25.697±1.407 |
|              | LPS+SIN         | 83.486±1.431  | 28.782±0.264 | 18.621±0.554 |
| <i>Ddx27</i> | siRNA-NC        | 65.752±1.898  | 23.284±0.761 | 15.978±0.157 |
|              | siDdx27         | 91.374±1.197  | 23.696±0.966 | 17.577±0.862 |
|              | siDdx27+LPS     | 129.621±2.192 | 41.810±1.363 | 39.741±0.747 |
|              | siDdx27+LPS+SIN | 103.485±2.786 | 30.584±1.081 | 30.511±1.292 |
|              | control         | 63.294±0.861  | 23.085±0.696 | 16.210±0.907 |
|              | LPS             | 95.064±1.733  | 28.584±0.260 | 22.400±0.317 |
|              | LPS+SIN         | 81.995±0.829  | 25.031±0.533 | 18.826±0.372 |
| <i>Utp18</i> | siRNA-NC        | 62.307±0.783  | 23.702±0.360 | 16.331±0.902 |
|              | siUtp18         | 77.376±1.284  | 23.583±0.852 | 16.823±0.477 |
|              | siUtp18+LPS     | 137.983±2.291 | 68.555±0.978 | 24.118±0.760 |
|              | siUtp18+LPS+SIN | 94.700±1.350  | 44.010±1.062 | 21.811±0.885 |
|              | control         | 63.294±0.861  | 23.085±0.696 | 23.085±0.696 |
|              | LPS             | 95.064±1.733  | 28.584±0.260 | 28.584±0.260 |
|              | LPS+SIN         | 81.995±0.829  | 25.031±0.533 | 25.031±0.533 |
| <i>Myh11</i> | siRNA-NC        | 62.307±0.783  | 23.702±0.360 | 23.702±0.360 |
|              | siMyh11         | 69.260±0.604  | 25.981±1.060 | 25.981±1.060 |
|              | siMyh11+LPS     | 95.180±2.125  | 48.606±0.682 | 48.606±0.682 |
|              | siMyh11+LPS+SIN | 78.426±1.774  | 40.036±1.425 | 40.036±1.425 |
|              | control         | 63.294±0.861  | 23.085±0.696 | 16.210±0.907 |

|              |                 |               |              |              |
|--------------|-----------------|---------------|--------------|--------------|
|              | LPS             | 95.064±1.733  | 28.584±0.260 | 22.400±0.317 |
|              | LPS+SIN         | 81.995±0.829  | 25.031±0.533 | 18.826±0.372 |
| <i>ADH5</i>  | siRNA-NC        | 62.307±0.783  | 23.702±0.360 | 16.331±0.902 |
|              | siADH5          | 70.824±0.690  | 30.125±1.114 | 16.912±0.501 |
|              | siADH5+LPS      | 158.798±4.357 | 40.567±1.521 | 32.785±0.673 |
|              | siADH5+LPS+SIN  | 127.258±4.776 | 34.014±1.496 | 27.439±1.581 |
|              | control         | 68.070±1.692  | 22.124±1.613 | 16.055±0.151 |
|              | LPS             | 97.022±1.537  | 30.186±0.978 | 25.697±1.407 |
|              | LPS+SIN         | 83.486±1.431  | 28.782±0.264 | 18.621±0.554 |
| <i>Syne3</i> | siRNA-NC        | 65.752±1.898  | 23.284±0.761 | 15.978±0.157 |
|              | siSyne3         | 88.215±1.372  | 26.258±1.108 | 16.864±0.314 |
|              | siSyne3+LPS     | 181.149±3.797 | 86.117±1.704 | 39.028±3.135 |
|              | siSyne3+LPS+SIN | 147.960±3.590 | 57.925±1.431 | 24.076±0.923 |

**Table S4. The level of TNF- $\alpha$ , IL-1 $\beta$  and IL-6 in cells after knockdown of the designated genes (*Ncaph*, *Trmt2a* or *Psm6*)**

| Gene          | Group           | TNF- $\alpha$ | IL-1 $\beta$ | IL-6         |
|---------------|-----------------|---------------|--------------|--------------|
|               | control         | 68.070±1.692  | 22.124±1.613 | 16.055±0.151 |
|               | LPS             | 97.022±1.537  | 30.186±0.978 | 25.697±1.407 |
|               | LPS+SIN         | 83.486±1.431  | 28.782±0.264 | 18.621±0.554 |
| <i>Ncaph</i>  | siRNA-NC        | 65.752±1.898  | 23.284±0.761 | 15.978±0.157 |
|               | siNcaph         | 78.746±2.621  | 23.715±0.094 | 18.958±0.517 |
|               | siNcaph+LPS     | 111.406±1.209 | 29.619±0.923 | 32.401±0.709 |
|               | siNcaph+LPS+SIN | 86.361±0.791  | 26.950±0.272 | 24.558±1.229 |
|               | control         | 63.294±0.861  | 23.085±0.696 | 16.210±0.907 |
|               | LPS             | 95.064±1.733  | 28.584±0.260 | 22.400±0.317 |
|               | LPS+SIN         | 81.995±0.829  | 25.031±0.533 | 18.826±0.372 |
| <i>Trmt2a</i> | siRNA-NC        | 62.307±0.783  | 23.702±0.360 | 16.331±0.902 |

|             |                  |               |              |              |
|-------------|------------------|---------------|--------------|--------------|
|             | siTrmt2a         | 65.777±0.941v | 20.667±0.284 | 15.853±0.376 |
|             | siTrmt2a+LPS     | 75.827±2.193  | 37.220±0.965 | 43.557±1.534 |
|             | siTrmt2a+LPS+SIN | 69.488±2.338  | 30.972±0.665 | 29.282±0.943 |
|             | control          | 68.070±1.692  | 22.124±1.613 | 16.055±0.151 |
|             | LPS              | 97.022±1.537  | 30.186±0.978 | 25.697±1.407 |
|             | LPS+SIN          | 83.486±1.431  | 28.782±0.264 | 18.621±0.554 |
| <i>Psm6</i> | siRNA-NC         | 65.752±1.898  | 23.284±0.761 | 15.978±0.157 |
|             | siPsm6           | 94.334±1.227  | 24.523±0.062 | 17.735±0.406 |
|             | siPsm6+LPS       | 132.476±4.291 | 31.780±0.056 | 24.830±0.431 |
|             | siPsm6+LPS+SIN   | 106.398±2.308 | 27.640±1.123 | 20.805±0.330 |

---
